# Supplementary material
Source: Elsevier journal article supplement (https://www.sciencedirect.com/science/article/pii/S0300289616300163)
Supplement: mmc1 [file S0300289616300163:mmc1.pdf]

# Recomendaciones SEPAR de diagnóstico y tratamiento del cáncer de pulmón de células no pequeñas

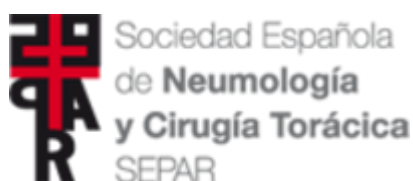

2016

## **INTRODUCCIÓN, OBJETIVOS Y METODOLOGÍA**

### **1. Título**

Recomendaciones SEPAR de diagnóstico y tratamiento del cáncer de pulmón de células no pequeñas.

1.a. Título abreviado: Recomendaciones SEPAR del cáncer de pulmón de células no pequeñas.

### **2. Antecedentes**

La Sociedad Española de Neumología y Cirugía Torácica (SEPAR) promueve, a través del Área de Cirugía Torácica, la elaboración del presente documento con el objeto de proporcionar recomendaciones para la práctica clínica, basadas en las mejores evidencias disponibles, en el proceso de diagnóstico y tratamiento de los pacientes afectados por cáncer de pulmón de células no pequeñas o no microcítico.

Estas recomendaciones se enmarcan en el trabajo que viene desarrollando SEPAR para la elaboración de documentación clínica relativa a dicha enfermedad y se suma al fondo documental disponible y que incluye distintos aspectos como son la nomenclatura, clasificación, diagnóstico, estadificación, terapéutica o la valoración del riesgo quirúrgico (1-5), que también suponen un elemento básico para la redacción del presente trabajo.

### **3. Necesidad y objetivos**

Según datos publicados por la Agencia Internacional para la Investigación en Cáncer (IACR) (6), en 2012 la incidencia de cáncer de pulmón (CP) en España fue de 26.715 casos, lo que representa el 16,9% de los tumores entre los hombres (21.780 casos) y el 5,7% entre las mujeres (4.935 casos).

En 2012 fallecieron en España 21.118 personas al año por su causa, 17.430 hombres (el 27,4% de todas las muertes por cáncer en varones), y 3.688 mujeres (el 9,4% de las muertes por cáncer en mujeres). Es la primera causa de muerte por cáncer en el sexo masculino, y la tercera en el femenino.

La gravedad relacionada con la incidencia y pronóstico del CP, la complejidad de las técnicas diagnósticas y la mayor disponibilidad de tratamientos hacen necesaria una constante actualización de los procesos de práctica clínica en esta enfermedad.

La necesidad de analizar la práctica clínica en nuestro medio y adaptarla a nuestra realidad hace aconsejable la elaboración de un documento que incorpore los últimos avances implementados en las distintas fases del proceso asistencial de nuestro sistema de salud, bajo la visión experta de los profesionales de las distintas especialidades que se integran en los comités multidisciplinarios.

Por tanto, este documento pretende tener un carácter dinámico que se vea facilitado por mejoras continuas con actualización de las recomendaciones según cambien las evidencias disponibles, por la publicación y revisión online, por favorecer la equidad del sistema sanitario, garantizando la mejor atención a los pacientes y por apoyar institucionalmente el proceso de toma de decisiones de los distintos profesionales.

#### **4. Grupos a los que va dirigido**

##### **4.a. Grupos considerados**

Los grupos de profesionales a los que va dirigida la presente guía son:

- Neumólogos, cirujanos torácicos, oncólogos, radioterapeutas, patólogos, internistas y otros especialistas directamente implicados en el tratamiento de los pacientes con carcinoma pulmonar de células no pequeñas o en la prevención de esta enfermedad.
- Otros médicos y profesionales de la salud

##### **4.b. Grupos no considerados**

- Pacientes diagnosticados de cáncer de pulmón de células pequeñas.

#### **5. Ámbito**

El ámbito de las recomendaciones incluirá la asistencia para la toma de decisiones en atención primaria y especializada en los procesos relacionados con el estudio de pacientes con sospecha clínica o radiológica de cáncer de pulmón, así como en la prevención.

También incluirá la asistencia para la toma de decisiones en atención especializada por parte de los distintos especialistas y comités multidisciplinares en los casos de cáncer de pulmón no microcítico en los procesos de diagnóstico y estadificación, además de en las decisiones relacionadas con los distintos aspectos terapéuticos.

## **6. Metodología**

Los coordinadores establecieron el temario del documento y asignaron, en consenso con el Área de Cirugía Torácica, cuatro directores, uno para cada capítulo, entre algunos de los profesionales de nuestra sociedad con mayor relevancia en la realización de trabajos similares.

Para cada apartado de los distintos capítulos se seleccionó un autor principal, en consenso entre los coordinadores y el Área de Cirugía Torácica. Dichos autores principales fueron mayoritariamente, pero no de forma exclusiva, miembros de SEPAR y fueron los encargados de seleccionar los colaboradores necesarios para cada tema tratado.

Todos los miembros del equipo recibieron una normativa específica en la que se incluyeron los vínculos al material necesario para su formación en la realización de las recomendaciones de práctica clínica, incluyendo su diseño, búsqueda y selección de literatura, evaluación y síntesis de las evidencias, así como la formulación de recomendaciones ajustadas al nivel de evidencia.

Una vez realizado y recopilado todo el material, se llevó a cabo una primera evaluación por los directores de los capítulos y posteriormente por los coordinadores de la guía. Después se realizó una nueva revisión por parte de los autores, intentando obtener la mayor homogeneidad en el contenido de los capítulos y del documento completo. Finalmente se hizo una revisión por parte de los autores de las recomendaciones y por el Comité Científico de SEPAR, hasta llegar al documento final (figura 1).

Figura 1. Esquema de trabajo seguido para la elaboración del documento.

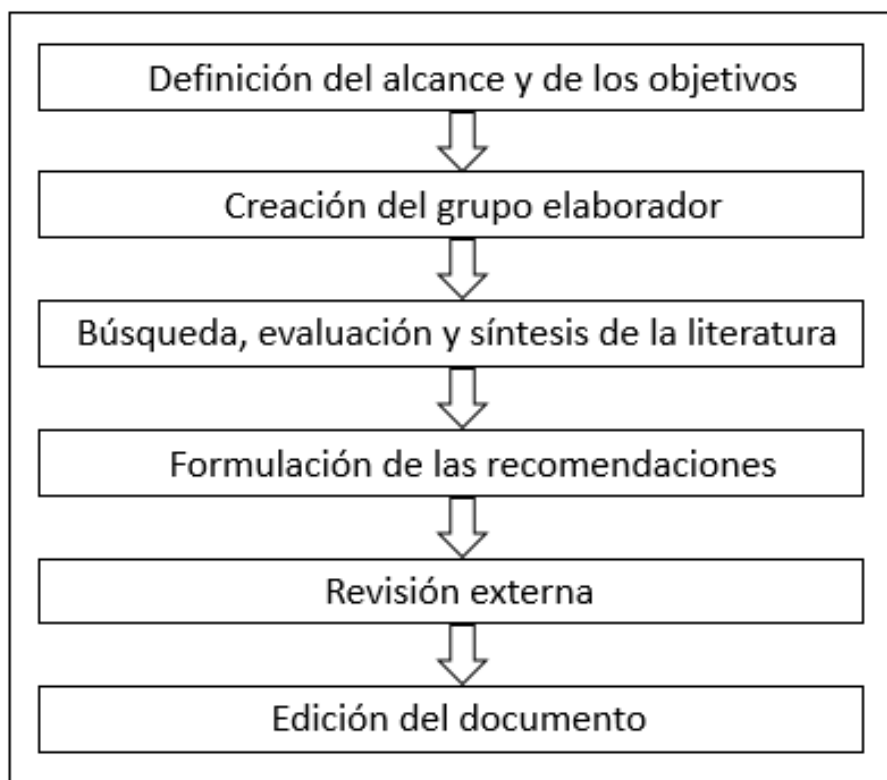

La búsqueda, evaluación y síntesis de la literatura comenzó, generalmente, por la revisión de otros documentos sobre el tema, a través de internet o páginas web de los organismos que las han elaborado. A continuación se realizaron búsquedas de revisiones sistemáticas y posteriormente de estudios individuales y originales. La búsqueda se realizó a través de bases de datos como la Biblioteca Cochrane, Medline (Pubmed u Ovid), DARE, EMBASE, Scopus o Google Scholar, y no estuvo limitada por la fecha de la publicación ni por otras variables, a no ser que fuera recomendado por alguno de los coordinadores de los capítulos.

En la formulación de las recomendaciones se han tenido en cuenta dos aspectos:

- La evaluación de la calidad global de la evidencia científica, buscando la confianza de que el efecto que estiman los estudios es cierto.
- La graduación de la fuerza de las recomendaciones, decidiéndose hasta que punto se puede confiar en que si se practica una recomendación el beneficio será mayor que el riesgo.

Para la formulación de recomendaciones se ha utilizado el grado de recomendación según el *American College of Chest Physicians-ACCP Grading System* (tabla 1). Este sistema se basa en dos dimensiones; en el equilibrio entre el beneficio y el riesgo (1 o 2) y en la calidad de la evidencia científica (A, B o C). Recomendaciones consistentes con evidencia de alta calidad tienen el grado recomendación 1A. Las que alcancen esta puntuación son aquellas para las que ese podría afirmar con confianza que los nuevos estudios cambiarían, con baja probabilidad, la dirección del efecto. Estas recomendaciones se aplicarían a la mayoría de los pacientes en la mayoría de las circunstancias. Pero a medida que el grado de recomendación disminuye, los valores y preferencias del paciente probablemente jugarían un papel cada vez más importante en la elección de los mejores tratamientos o intervenciones para cada paciente (7).

Tabla 1. Grados de recomendación según el *American College of Chest Physicians-ACCP Grading System*. Modificado de la referencia 7.

| Grado de recomendación                                  | Beneficio vs riesgo                                                                                            | Fuerza metodológica de la evidencia de soporte                                                                                                                                                                   | Implicaciones                                                                                                                                                                                                                                                       |
|---------------------------------------------------------|----------------------------------------------------------------------------------------------------------------|------------------------------------------------------------------------------------------------------------------------------------------------------------------------------------------------------------------|---------------------------------------------------------------------------------------------------------------------------------------------------------------------------------------------------------------------------------------------------------------------|
| 1A. Recomendación fuerte, evidencia de alta calidad     | Los beneficios sobrepasan claramente los riesgos o viceversa                                                   | Evidencia consistente de ensayos clínicos aleatorizados sin limitaciones importantes o excepcionalmente evidencia fuerte de estudios observacionales                                                             | Recomendación que puede aplicarse en la mayoría de los pacientes y en la mayoría de las circunstancias. Más investigación es muy poco probable que cambien nuestra confianza en la estimación del efecto                                                            |
| 1B. Recomendación fuerte, evidencia de moderada calidad | Los beneficios sobrepasan claramente los riesgos o viceversa                                                   | Evidencia de ensayos clínicos aleatorizados con limitaciones importantes (resultados inconsistentes, defectos metodológicos, evidencia indirecta o imprecisa) o evidencia muy fuerte de estudios observacionales | Recomendación que puede aplicarse en la mayoría de los pacientes y en la mayoría de las circunstancias. La investigación de alta calidad bien puede tener un impacto importante en nuestra confianza en la estimación del efecto y puede cambiar la estimación      |
| 1C. Recomendación fuerte, evidencia de baja calidad     | Los beneficios sobrepasan claramente los riesgos o viceversa                                                   | Evidencia de al menos un resultado crítico de estudios observacionales, series de casos, o de ensayos clínicos aleatorizados con defectos serios o evidencia indirecta                                           | Recomendación que puede aplicarse en la mayoría de los pacientes y en muchas de las circunstancias. La investigación de alta calidad es probable que tenga un impacto importante en nuestra confianza en la estimación del efecto y puede cambiar la estimación     |
| 2A. Recomendación débil, evidencia de alta calidad      | Los beneficios de balancean estrechamente con los riesgos                                                      | Evidencia consistente de ensayos clínicos aleatorizados sin limitaciones importantes o excepcionalmente evidencia fuerte de estudios observacionales                                                             | La mejor acción puede diferir dependiendo de las circunstancias, de los pacientes o de los valores sociales. Más investigación es muy poco probable que cambien nuestra confianza en la estimación del efecto                                                       |
| 2B. Recomendación débil, evidencia de moderada calidad  | Los beneficios de balancean estrechamente con los riesgos                                                      | Evidencia de ensayos clínicos aleatorizados con limitaciones importantes (resultados inconsistentes, defectos metodológicos, evidencia indirecta o imprecisa) o evidencia muy fuerte de estudios observacionales | La mejor acción puede diferir dependiendo de las circunstancias, de los pacientes o de los valores sociales. La investigación de alta calidad bien puede tener un impacto importante en nuestra confianza en la estimación del efecto y puede cambiar la estimación |
| 2C. Recomendación débil, evidencia de baja calidad      | Incertidumbre en el cálculo de los beneficios y los riesgos, los cuales pueden estar estrechamente balanceados | Evidencia de al menos un resultado crítico de estudios observacionales, series de casos, o de ensayos clínicos aleatorizados con defectos serios o evidencia indirecta                                           | Otras alternativas pueden ser igualmente razonables. . La investigación de alta calidad es probable que tenga un impacto importante en nuestra confianza en la estimación del efecto y puede cambiar la estimación                                                  |

## 7. Financiación

Ninguno de los autores o coordinadores ha recibido pago alguno por su participación en la elaboración de este documento.

## Bibliografía

1. Sánchez de Cos J, Hernández JH, López MF, Sánchez SP, Gratacós AR, Porta RR; Sociedad Española Neumología y Cirugía Torácica. Normativa SEPAR sobre estadificación del cáncer de pulmón. Arch Bronconeumol. 2011;47:454-65.
2. Varela-Simó G, Barberà-Mir JA, Cordovilla-Pérez R, Duque-Medina JL, López-Encuentra A, Puente-Maestu L; Sociedad Española de Neumología y Cirugía Torácica. Normativa sobre valoración del riesgo quirúrgico en el carcinoma broncogénico. Arch Bronconeumol. 2005;41:686-97.
3. Carrillo Arias F, Cueto Ladrón de Guevara A, Díaz Jiménez JP, Martínez González del Río J, Padilla Alarcón J, Sánchez de Cos Escuin J. Normativa sobre terapéutica del carcinoma broncogénico. Barcelona: Ediciones Doyma; 2005.
4. Grupo Cooperativo de Carcinoma Broncogénico de la Sociedad Española de Neumología y Cirugía Torácica. Estadificación ganglionar intraoperatoria en la cirugía del carcinoma broncogénico. Documento de consenso. Arch Bronconeumol. 2001;37:495-503.
5. Lopez Encuentra A, León González C, López Mejías J, Martínez Gonzalez del Río J, París Romeu F, Sánchez Lloret J, et al. Nomenclatura y clasificación del carcinoma broncogénico. Arch Bronconeumol. 1990;26:54-60.
6. Ferlay J, Soerjomataram I, Ervik M, Dikshit R, Eser S, Mathers C, et al. GLOBOCAN 2012 v1.0, Cancer Incidence and Mortality Worldwide: IARC CancerBase No. 11. Disponible en: <http://globocan.iarc.fr/Default.aspx>
7. Lewis SZ, Diekemper R, Addrizzo-Harris DJ. Methodology for development of guidelines for lung cancer: Diagnosis and management of lung cancer, 3rd ed: American College of Chest Physicians evidence-based clinical practice guidelines. Chest. 2013;143(5 Suppl):41S-50S.

## **1. PREVENCIÓN Y CRIBADO**

### **1.a. FACTORES DE RIESGO**

#### **1.a.1. Cáncer de pulmón. Factores de riesgo**

Es bien conocido que el humo del cigarrillo es el principal agente causal del CP. Sin embargo se ha identificado la existencia de otros factores como parte integrante de la etiología del CP que pueden actuar incluso sinérgicamente con el humo del cigarrillo, dando lugar a un incremento de la prevalencia del CP. A lo largo del siglo XX se demostró que diversas sustancias actúan como agentes carcinógenos muy potentes para el CP, identificados como carcinógenos respiratorios ocupacionales: radón, arsénico, asbesto, cromatos, éteres de clorometilo, níquel, hidrocarburos policíclicos aromáticos, alquitrán y la polución ambiental, fruto de carcinógenos generados por la combustión de gasolina y diésel, de forma muy especial en áreas urbanas.

También existen diversos carcinógenos domésticos ambientales tales como; radón, asbesto, el del humo del cigarrillo, así como el humo de chimeneas y cocinas (hollín), que puede contener sustancias carcinógenas respiratorias.

Los principales factores de riesgo de desarrollo de CP que han sido identificados son (1):

- Humo del cigarrillo: Se trata del agente responsable del desarrollo de CP en un 90% de los casos. Este factor etiológico para CP ha sido ampliamente estudiado en diversos estudios epidemiológicos.
- Dieta: Se han llevado a cabo estudios que demuestran la posible relación entre la dieta y el desarrollo de CP a lo largo de las últimas décadas. En general se puede concluir que los individuos que ingieren mayores cantidades de frutas y vegetales, con elevado contenido en antioxidantes, estarían más protegidos para el desarrollo de CP.
- Actividad física: Los individuos con mayor actividad física tienen un riesgo más bajo para el desarrollo de CP que los sedentarios, incluso tras ajustar por consumo de cigarrillos.
- Exposiciones ocupacionales: tal como mencionado arriba, la exposición continuada a los diferentes agentes, ambientales domésticos o industriales, incrementa el riesgo de CP en las personas expuestas, al margen del humo del cigarrillo, en el caso de que también sean fumadores.



- Radiaciones: La exposición continuada a radiaciones ionizantes aumenta el riesgo de CP.
- Polución ambiental: Este factor puede contribuir al desarrollo de CP especialmente en zonas urbanas, en las que el grado de contaminación ambiental es más elevado.
- Factores relacionados con el huésped: La susceptibilidad genética es un factor de riesgo importante puesto que no todos los individuos fumadores y/o expuestos a agentes carcinogénicos desarrollan CP. De hecho, diversos estudios han demostrado la existencia de una agregación familiar para el desarrollo del CP.
- Existencia de una enfermedad pulmonar adquirida: Además de los factores genéticos hereditarios, la susceptibilidad al desarrollo de CP se ve incrementada si los individuos padecen una enfermedad respiratoria subyacente como la enfermedad pulmonar obstructiva crónica (EPOC), de forma predominante, y las enfermedades fibróticas del tipo neumoconiosis, la fibrosis pulmonar idiopática y la esclerosis sistémica. Si bien las implicaciones de estas dos últimas entidades en la etiología del CP no están del todo esclarecidas, dado que mientras algunos estudios han puesto de manifiesto que las enfermedades intersticiales aumentan el riesgo de CP, otras investigaciones han demostrado que el CP puede ocasionar dichas enfermedades.

Dado que la mayoría de los estudios se han centrado en estudiar los mecanismos por los cuales la EPOC favorece el desarrollo de CP, a continuación se describen los mecanismos y eventos biológicos implicados en la mayor predisposición de los pacientes EPOC a desarrollar CP.

### **1.a.2. Cáncer de pulmón y EPOC**

La EPOC y el CP son dos entidades de elevada prevalencia que irán en aumento en las próximas décadas dado que el número de mujeres fumadoras es cada vez mayor en nuestras sociedades. Diversos estudios han mostrado que la EPOC, y más concretamente el enfisema pulmonar, es un factor de riesgo *per se* para el desarrollo de CP. En este sentido, se ha demostrado la presencia de ciertas alteraciones moleculares en las vías aéreas de pacientes con EPOC y CP. De entre ellas destacan modificaciones en la expresión de genes implicados en el remodelado tisular así como en procesos de defensa celulares. Por similitud con otras neoplasias, la inflamación crónica de la vía aérea y pulmones es probablemente uno de los mecanismos fisiopatológicos que juega un papel más relevante en el desarrollo de CP en los pacientes con EPOC. Así, diversas citoquinas, entre las que destaca el papel del factor de crecimiento endotelial vascular (VEGF), parecen jugar un papel clave en la amplificación de la

respuesta mutagénica inicial (figura 1). El estrés oxidativo, como consecuencia directa de los componentes del humo del cigarrillo y/o el aumento de la presencia de células inflamatorias en la vía aérea y pulmones de los pacientes, también parece jugar un papel clave en el desarrollo del CP. Las alteraciones epigenéticas y otros mecanismos biológicos también parecen ser un sustrato para el desarrollo de CP en pacientes con enfermedades crónicas respiratorias. A continuación se describen los mecanismos y eventos moleculares sobre los que se ha demostrado su mayor implicación en el desarrollo de CP en los pacientes con enfermedades crónicas respiratorias como la EPOC.

Figura 1. Papel de las citoquinas en la amplificación de la respuesta mutagénica inicial.

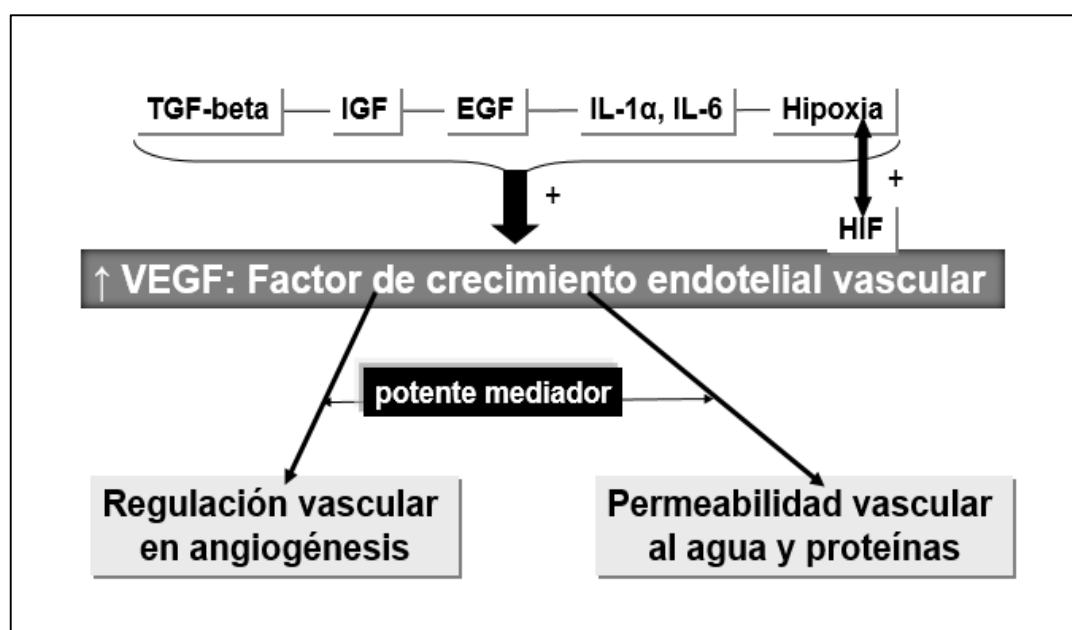

#### 1.a.2.a. Asociación entre cáncer de pulmón y EPOC

El cáncer de pulmón es una de las principales causas de muerte debidas a cáncer en todo el mundo. El cáncer de pulmón de células no pequeñas (CPCNP) representa aproximadamente el 80% de todos los casos de CP. Esta enfermedad es raramente curable, con una tasa de supervivencia global inferior al 15% a los 5 años. El tratamiento curativo de elección es la cirugía, si bien sólo el 25% de los pacientes son tributarios de ser intervenidos quirúrgicamente ya sea por la existencia de una enfermedad subyacente grave, como la EPOC, o bien por la propia diseminación de la enfermedad neoplásica y/o estadificación del tumor. Asimismo se estima que la supervivencia a 5 años de los pacientes operados es inferior al 50% (2). Por otro lado, está bien establecido que la EPOC, enfermedad también de muy elevada prevalencia en

nuestro medio (3), es un factor de riesgo independiente para el desarrollo de CP (4-8) (figura 2). Así, se ha descrito que la incidencia de cáncer de pulmón es entre 2 y 5 veces superior en los pacientes fumadores con EPOC moderada y grave, al compararla con poblaciones de fumadores sin EPOC (4-8).

Figura 2. La EPOC como factor de riesgo en el desarrollo del CP (7).

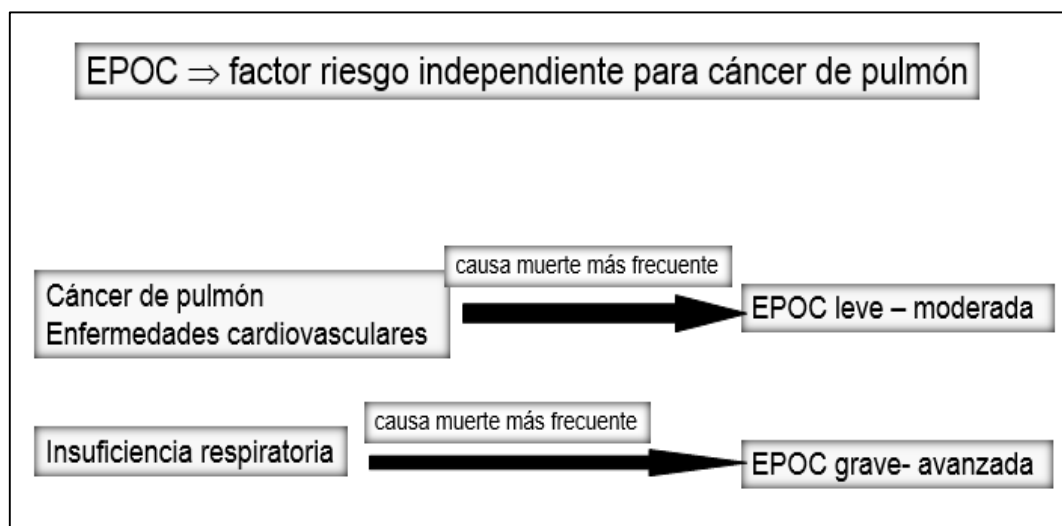

Se ha puesto de manifiesto en un estudio muy exhaustivo que dentro de la EPOC, el fenotipo enfisematoso parece ser el más fuertemente implicado con el desarrollo del CP en los pacientes (figura 3) (4). Las incidencias de CP y EPOC parecen disminuir de forma significativa en respuesta al cese del hábito tabáquico, aunque permanecen más elevadas durante años en los individuos ex-fumadores que en los nunca fumadores (5).

Figura 3. Relación del fenotipo enfisematoso de la EPOC con el CP (4).

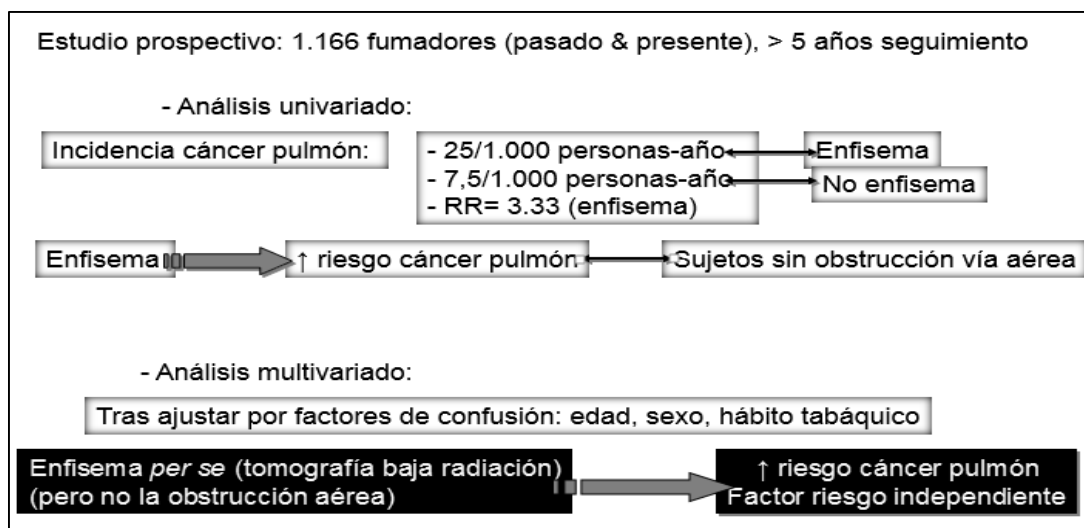

### *Recomendación*

- En la EPOC (fenotipo enfisema especialmente) la incidencia de CP está elevada (Grado 1A).

#### *1.a.2.b. Inflamación y cáncer de pulmón en pacientes con EPOC*

Los mecanismos biológicos mediante los cuales la EPOC induce un aumento en el riesgo de aparición de una neoplasia son todavía escasamente conocidos. Si bien, se acepta que la inflamación crónica puede jugar un papel clave en la patogenia del CP en estos pacientes, al igual que sucede en otros órganos y enfermedades, como el páncreas, el colon y el esófago, en los que la inflamación crónica constituye un buen substrato patológico para el desarrollo ulterior de neoplasias relacionadas. De hecho, se estima que la inflamación crónica contribuye al desarrollo de un 25% de los cánceres en los pacientes (9). Es posible que la inflamación persistente en la vía aérea de los pacientes con EPOC induzca alteraciones en el epitelio bronquial y el microambiente pulmonar que favorezcan la carcinogénesis. Estudios experimentales han puesto de manifiesto que en pacientes con EPOC y en fumadores aumenta la expresión de ciertas citoquinas como la interleuquina (IL)-6, IL-8, e IL-10, que a su vez mediante la inducción de la enzima ciclooxigenasa-2, promueven la respuesta inflamatoria en los linfocitos (10). Concretamente, estas citoquinas pueden inhibir la apoptosis, interferir con los mecanismos de reparación celular, y promover la angiogénesis (10), contribuyendo así al proceso neoproliferativo (figura 4).

Otros mecanismos inflamatorios implicados en el CP son el VEGF, potente regulador de angiogénesis, la hipoxia, el factor de crecimiento epidermoide (EGF) y el factor de crecimiento transformante-beta (TGF-beta). Todo esto lleva a pensar que la inflamación crónica es probablemente clave en la amplificación del proceso de mutagénesis inicial, en la facilitación del crecimiento tumoral (creación de un ambiente pro-angiogénico) y en la formación de metástasis a distancia (10) (figura 1). Es interesante destacar que la inflamación crónica en las vías aéreas persiste incluso años después del cese del hábito tabáquico, constituyendo probablemente uno de los mecanismos fisiopatológicos subyacentes para el desarrollo del CP en los pacientes con EPOC, incluso tras varios años de la interrupción del hábito de fumar. En los próximos años cabrá identificar los eventos celulares y moleculares derivados de la persistencia de la inflamación crónica (órganos linfoides terciarios, macrófagos y otras

estructuras) en las vías aéreas y pulmones de pacientes con enfermedades crónicas respiratorias (11,12), que pudieran estar, a su vez, implicados en el desarrollo de un CP.

Figura 4. Papel de la EPOC y el humo del cigarrillo en el proceso neoproliferativo del cáncer de pulmón.

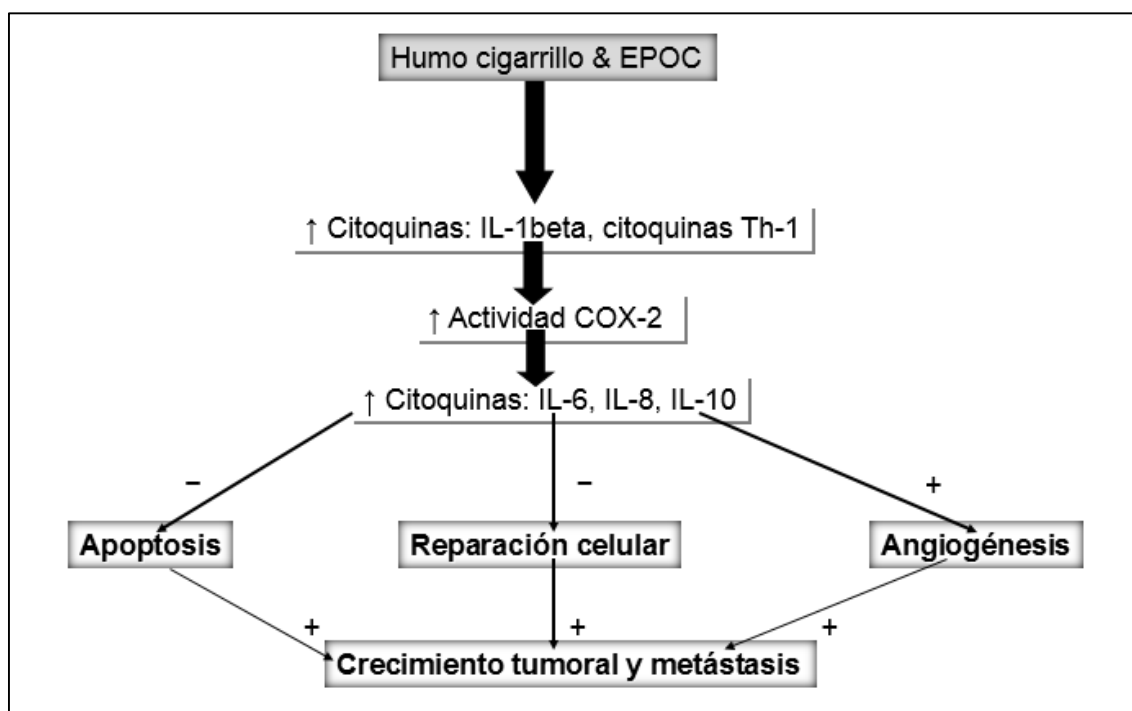

Además, los niveles de otras citoquinas como el factor de necrosis tumoral (TNF)-alfa, IL-2, y leptina también estaban aumentados (13) en el compartimento de vía aérea (condensado de aire exhalado) de pacientes con CP. Dada la pequeña invasividad en la obtención de este tipo de muestra, cabría la posibilidad de la utilización de este método diagnóstico escasamente invasivo para el diagnóstico precoz y sobre todo el seguimiento de los pacientes con CP (14,15). De todos modos, se trata de una técnica que presenta todavía problemas de variabilidad en la recolección y calidad de la muestra, factores que limitan su implementación a tal fin en la práctica clínica diaria por ahora. Por otro lado, el receptor del factor EGF (EGFR) es un receptor celular de superficie caracterizado por la presencia de un dominio tirosina quinasa, que modula numerosas funciones celulares, las cuales, a su vez, determinan el grado de tumorigénesis, la invasividad tumoral y la resistencia al tratamiento. Se trata de un marcador importante en el CP, claramente demostrado por las posibles mutaciones sufridas por la molécula, pero la identificación del papel específico de su sobre-expresión es todavía muy controvertida, dado

que aún se debe de confirmar que se trate de un buen predictor de respuesta al tratamiento con los inhibidores específicos de la tirosina quinasa del EGFR (16).

En un estudio reciente (17) se puso de manifiesto que los niveles de diversos parámetros de inflamación, especialmente citoquinas y factores de crecimiento, estaban aumentados en el epitelio bronquial sano, alejado al tumor, de pacientes con CP con y sin EPOC. En el mismo estudio (17) también se puso de manifiesto que diversos parámetros inflamatorios sistémicos, incluido el recuento de neutrófilos, estaban elevados en los pacientes con CP, con y sin EPOC. Además se estimó que la sensibilidad y especificidad para cáncer de pulmón de los parámetros TNF-alfa y TGF-beta obtenidos en el epitelio bronquial fueron elevadas a partir de cierto nivel en los pacientes con EPOC (17). En el compartimento sanguíneo, el TNF-alfa resultó ser el parámetro con mayor especificidad y sensibilidad para cáncer de pulmón en los mismos pacientes (17).

### *Recomendación*

- Los eventos moleculares y celulares de inflamación local (vía aérea y pulmonar) contribuyen a la patogenia del CP en pacientes con enfermedades crónicas respiratorias (Grado 1A).

#### *1.a.2.c. Estrés oxidativo y cáncer de pulmón en pacientes con EPOC*

Otro de los mecanismos potencialmente implicado en el desarrollo de CP en pacientes portadores de una EPOC sería la presencia de niveles aumentados de estrés oxidativo y nitrosativo, eventos moleculares ya habitualmente presentes en dichos pacientes, tanto a nivel bronquial y sistémico (18,19). Además el consumo de cigarrillos, en sus fases gaseosa y sólida, conlleva *per se* un aumento elevado de producción de especies reactivas de oxígeno y nitrógeno (ROS y RNS, respectivamente), así como una activación de células inflamatorias (leucocitos), que a su vez contribuirán a aumentar más los niveles de oxidantes tanto a nivel local como sistémico. Un exceso en la producción de radicales oxigenados y nitrogenados, no neutralizado por los sistemas antioxidantes tisulares, (desarrollo de estrés oxidativo y nitrosativo) podrá inducir modificaciones estructurales y funcionales en otras estructuras y organelos de la célula como los lípidos, las proteínas y el ADN, repercutiendo así negativamente en todas las cascadas de señalización y vías metabólicas dependientes de las mismas (figura 5).

Figura 5. Papel del estrés oxidativo en el CP de pacientes con EPOC.

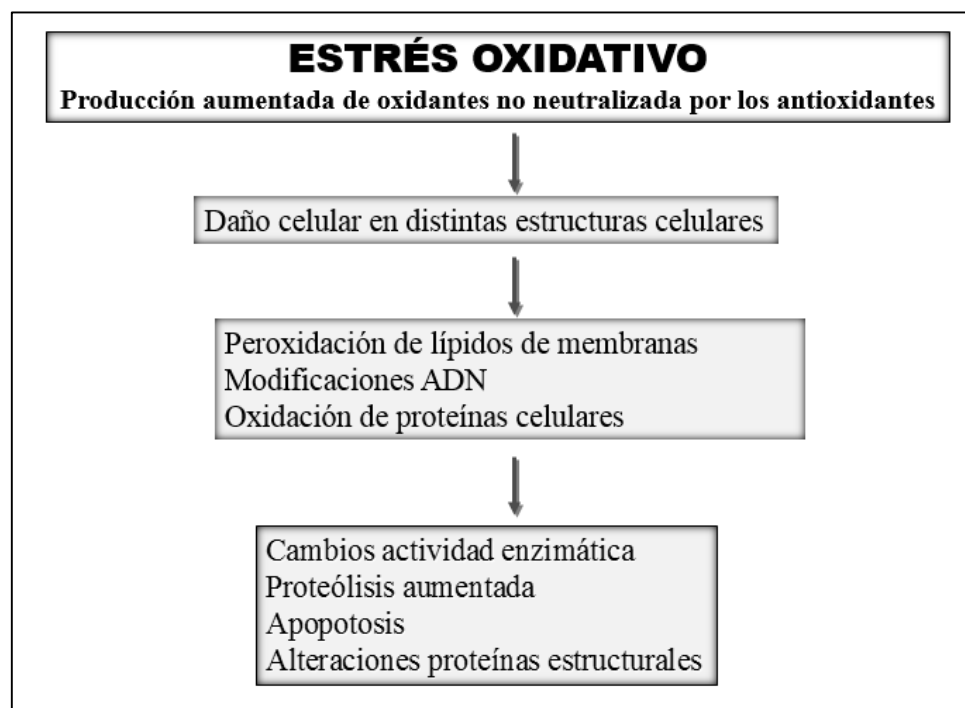

Las proteínas y el ADN nuclear constituyen las moléculas diana de los efectos deletéreos del exceso de oxidantes en los tejidos. Se ha descrito niveles aumentados de estrés oxidativo y nitrosativo, así como la presencia de proteínas modificadas por las ROS y RNS en la sangre de pacientes con CP, tales como el fibrinógeno, la transferrina, el plasminógeno y la ceruloplasmina (20). En otro estudio más reciente se demostraron niveles aumentados de estrés nitrosativo (inmunohistoquímica) en la zona tumoral respecto de la zona circundante sin afectación tumoral, en pacientes sin EPOC (21). En el mismo trabajo, se procedió a la identificación (proteómica) de las proteínas modificadas por un exceso de RNS en la zona tumoral, resultando ser proteínas antioxidantes, enzimas del metabolismo de la glucosa y lípidos, proteínas implicadas en la apoptosis, y proteínas estructurales, entre las más destacables (21). Los autores concluyeron que las especies oxidantes derivadas del óxido nítrico jugaban, probablemente, un papel preponderante en la patogénesis del CP. También se ha demostrado unos niveles más elevados de marcadores de estrés oxidativo en la sangre de pacientes con CP avanzado, especialmente en aquéllos portadores de un carcinoma escamoso (22).

En un estudio más reciente (17), se ha podido demostrar que los niveles de diversos parámetros de estrés oxidativo estaban aumentados en el epitelio bronquial sano, distante al tumor, de pacientes con CP, especialmente en aquéllos con EPOC, mientras que el contenido de antioxidantes estaba disminuido en los mismos pacientes respecto de los sujetos control.

Concretamente se identificó que diversas proteínas estructurales y funcionales (actina, vimentina, cofilina-1, superóxido dismutasas, alfa-1 antitripsina, y anhidrasa carbónica) estaban oxidadas en el epitelio bronquial sano de los pacientes con CP respecto de los sujetos control (17). En el mismo estudio se pudo demostrar que los niveles de ciertos marcadores de estrés oxidativo como el ADN oxidado, el anión superóxido y los niveles totales de proteínas oxidadas estaban aumentados en la sangre de los pacientes con EPOC y CP respecto de los sujetos control (17). Además se puso de manifiesto que la sensibilidad y especificidad para CP de los parámetros ADN oxidado y anión superóxido fueron elevadas por encima de un valor mínimo obtenido en sangre en todos los pacientes con EPOC (17).

### *Recomendaciones*

- El estrés oxidativo local (vía aérea y pulmonar) contribuye a la patogenia del CP en pacientes con enfermedades crónicas respiratorias. (Grado 1A).
- El estrés oxidativo sistémico (sangre) es un potencial valor predictivo de desarrollo de CP en pacientes con EPOC (Grado 1B).

#### *1.a.2.d. Alteraciones epigenéticas y cáncer de pulmón en pacientes con EPOC*

También se ha puesto de manifiesto la existencia de asociaciones entre vías de respuesta celular al estrés oxidativo (regulación de sistemas antioxidantes, receptores esteroideos, hemo oxigenasas, e hipoxia) y mecanismos epigenéticos, definidos como las modificaciones funcionales heredables del ADN sin inducir cambios en su secuencia (23,24). En este sentido, los mecanismos moleculares que sustentan los cambios epigenéticos pueden dividirse en 4 grandes categorías: 1) metilación del ADN, 2) modificaciones covalentes de las histonas, 3) mecanismos no covalentes (remodelado del nucleosoma e incorporación de variantes de histonas), y 4) ARNs no codificantes, como los microARNs (23,24). Se ha visto además que modificaciones postransduccionales aberrantes de las histonas tienen un valor predictivo y pronóstico en el CP (23,24). Más concretamente se ha demostrado que la expresión aberrante de reguladores epigenéticos como las deacetilasas de las histonas (HDACs), complejos multiproteicos reguladores de la expresión génica en residuos de lisina, están implicadas en el desarrollo de EPOC y de CP (23,25). Por ejemplo, la expresión de las HDACs 2, 5, y 8 estaba reducida en los pulmones de pacientes con EPOC de diversos grados de gravedad (23,25). Los niveles de HDAC2 estaban también disminuidos en respuesta al humo del cigarrillo en los pacientes con EPOC (23-26). Otro estudio realizado en líneas celulares de



epitelio bronquial mostró que el estrés oxidativo redujo los niveles de la HDAC2 (26). Los niveles de la HDAC dependiente del sustrato NAD<sup>+</sup>, Sirtuin 1 (SIRT1), también estaban disminuidos en pacientes con EPOC (23-26). También se ha demostrado que la inhibición de la actividad HDAC en conjunto, mediante el inhibidor tricostatina A, indujo cambios moleculares e histológicos compatibles con enfisema en el parénquima pulmonar de ratas (27). Además también se ha puesto de manifiesto en otra investigación en un modelo *in vitro* que la HDAC2 deteriora la ruta antioxidante mediada por el factor nuclear relacionado con el factor eritroide-2 (Nrf2), a través de un incremento de los niveles de estrés oxidativo (23). Todos estos estudios ponen en evidencia que la expresión aberrante de HDACs está implicada en la patogénesis de la EPOC y que el estrés oxidativo puede ser un mediador clave en este proceso (25). En muestras procedentes de tumores pulmonares se observó un aumento de la expresión de las enzimas HDAC1 y HDAC3 (23-26). También se pudo demostrar que el humo del cigarrillo activa la molécula de señalización “*nuclear factor*” (NF)- $\kappa$ B mediante la reducción de la actividad HDAC y la modificación de la estructura de las proteínas HDAC1, HDAC2, y HDAC3 (26).

Otra modificación epigenética de elevado interés en el estudio del CP es la metilación del ADN. Se trata de una de las modificaciones epigenéticas más relevantes del genoma, dado que afecta diversos genes supresores de tumores implicados en procesos celulares diversos como la apoptosis, la adherencia celular, la reparación del ADN y el control del ciclo celular (28). Esta modificación consiste en la incorporación de un grupo metilo en las citosinas que preceden a guanidinas (CpG dinucleótidos). La metilación del ADN en la región promotora del gen da lugar a su silenciación e inactivación. De ahí el papel relevante de este tipo de modificaciones en el desarrollo de tumores cuando afectan de forma específica regiones promotoras de genes antitumorales. Durante la carcinogénesis, los fenómenos de metilación del ADN ocurren de forma precoz y frecuente. Por dicha razón el análisis de la metilación del ADN aparece como un mecanismo molecular de interés en el estudio de la biología del cáncer así como para su utilización como marcador de carcinogénesis. Otra ventaja que ofrece el análisis de la metilación del ADN se basa en que puede ser analizada en otros órganos a distancia como la sangre, el esputo, o el lavado broncoalveolar. En un estudio (29), se observaron perfiles diferentes de hipermetilación del ADN en tumores de pulmón según el tipo histológico y el sexo de los pacientes. También se ha propuesto recientemente que la metilación aberrante de diversos genes, especialmente de los genes supresores de tumores es clave para el inicio y desarrollo del CP. Más concretamente, la metilación aberrante de genes implicados en el control

del ciclo celular, la apoptosis, la reparación del ADN, y la aparición de metástasis estaría implicada en el proceso de carcinogénesis en el CP (30).

Por último, otro mecanismo epigenético de interés consiste en el análisis del potencial valor de los microARNs para el diagnóstico precoz del cáncer de pulmón en pacientes con EPOC. En este sentido, un estudio reciente puso de manifiesto que diversos microARNs detectados en sangre podrían ser utilizados en el futuro para el diagnóstico precoz y seguimiento (pronóstico) de pacientes con diversos tipos histológicos de CP (31). Sin embargo, a pesar de todo este conocimiento, en los pacientes con EPOC, falta todavía por identificar los genes susceptibles de sufrir metilaciones aberrantes en la vía aérea y parénquima pulmonar, que podrían inducir la carcinogénesis en dichos compartimentos.

### *Recomendación*

- Las alteraciones epigenéticas (pulmón y sangre) son potenciales marcadores de diagnóstico precoz, seguimiento y pronóstico de CP (Grado 1B/C).
- En las alteraciones epigenéticas (pulmón y sangre) está pendiente la identificación de potenciales marcadores de diagnóstico precoz de CP en pacientes con EPOC (Grado 1C).

#### *1.a.2.e. Señalización, EPOC y cáncer de pulmón*

Un mecanismo de interés dentro de las relaciones entre la epigenética y el estrés oxidativo en el CP es el factor inducible a la hipoxia (HIF)-1alfa y HIF-2alfa. Este factor juega un papel relevante en el desarrollo del cáncer, a través del control directo de la expresión de reguladores epigenéticos tales como las demetilinas de lisina (26). Se ha demostrado que la inhibición de HIF-1alfa mediante técnicas de silenciación de su ARN dio lugar a una mejor supervivencia de los ratones con CP medida por la reducción de la proliferación de las células tumorales y del proceso de angiogénesis (26). La vía de señalización celular NF- $\kappa$ B (p65, Rel B, c-rel, p52, and p50) modula procesos de vida y muerte celulares en respuesta a diversos estímulos como el estrés oxidativo y la inflamación. En este sentido, se ha observado también la existencia de una relación entre estrés oxidativo, TNF-alfa y NF- $\kappa$ B/AP-1 en un modelo de células de cáncer de pulmón, que tuvo como consecuencia la acetilación de histonas así como un aumento de la producción de IL-8 en dichas células (20).

## Resumen de recomendaciones

| Recomendación                                                                                                                                                           | Grado |
|-------------------------------------------------------------------------------------------------------------------------------------------------------------------------|-------|
| En la EPOC (fenotipo enfisema especialmente) la incidencia de CP está elevada.                                                                                          | 1A    |
| Los eventos moleculares y celulares de inflamación local (vía aérea y pulmonar) contribuyen a la patogenia del CP en pacientes con enfermedades crónicas respiratorias. | 1A    |
| El estrés oxidativo local (vía aérea y pulmonar) contribuye a la patogenia del CP en pacientes con enfermedades crónicas respiratorias.                                 | 1A    |
| El estrés oxidativo sistémico (sangre) es un potencial valor predictivo de desarrollo de CP en pacientes con EPOC.                                                      | 1B    |
| Las alteraciones epigenéticas (pulmón y sangre) son potenciales marcadores de diagnóstico precoz, seguimiento y pronóstico de CP.                                       | 1B/C  |
| En las alteraciones epigenéticas (pulmón y sangre) está pendiente la identificación de potenciales marcadores de diagnóstico precoz de CP en pacientes con EPOC.        | 1C    |

## Bibliografía

1. Alberg AJ, Ford JG, Samet JM; American College of Chest Physicians. Epidemiology of lung cancer: ACCP evidence-based clinical practice guidelines (2nd edition). Chest. 2007;132(3 Suppl):29S-55S.
2. Duque JK, Lopez-Encuentra A, Porta RR. Survival of 2,991 patients with surgical lung cancer: the denominator effect in survival. Chest. 2005;128:2274-81.
3. Miravittles M, Soler-Cataluna JJ, Calle M, Molina J, Almagro P, Antonio QJ, et al. Guía española de la EPOC (GesEPOC). Actualización 2014. Arch Bronconeumol. 2014;50 Suppl 1:1-16.
4. de Torres JP, Bastarrika G, Wisnivesky JP, Alcaide AB, Campo A, Seijo LM, et al. Assessing the relationship between lung cancer risk and emphysema detected on low-dose CT of the chest. Chest. 2007;132:1932-8.
5. Mayne ST, Buenconsejo J, Janerich DT. Previous lung disease and risk of lung cancer among men and women nonsmokers. Am J Epidemiol. 1999;149:13-20.

6. Papi A, Casoni G, Caramori G, Guzzinati I, Boschetto P, Ravenna F, et al. COPD increases the risk of squamous histological subtype in smokers who develop non-small cell lung carcinoma. *Thorax*. 2004;59:679-81.
7. Sin DD, Anthonisen NR, Soriano JB, Agusti AG. Mortality in COPD: Role of comorbidities. *Eur Respir J*. 2006;28:1245-57.
8. Skillrud DM, Offord KP, Miller RD. Higher risk of lung cancer in chronic obstructive pulmonary disease. A prospective, matched, controlled study. *Ann Intern Med*. 1986;105:503-7.
9. Cho WC, Kwan CK, Yau S, So PP, Poon PC, Au JS. The role of inflammation in the pathogenesis of lung cancer. *Expert Opin Ther Targets*. 2011;15:1127-37.
10. O'Byrne KJ, Dalglish AG. Chronic immune activation and inflammation as the cause of malignancy. *Br J Cancer*. 2001;85:473-83.
11. Bracke KR, Verhamme FM, Seys LJ, Bantsimba-Malanda C, Cunoosamy DM, Herbst R, et al. Role of CXCL13 in cigarette smoke-induced lymphoid follicle formation and chronic obstructive pulmonary disease. *Am J Respir Crit Care Med*. 2013;188:343-55.
12. Litsiou E, Semitekolou M, Galani IE, Morianos I, Tsoutsas A, Kara P, et al. CXCL13 production in B cells via Toll-like receptor/lymphotoxin receptor signaling is involved in lymphoid neogenesis in chronic obstructive pulmonary disease. *Am J Respir Crit Care Med*. 2013;187:1194-202.
13. Carpagnano GE, Spanevello A, Curci C, Salerno F, Palladino GP, Resta O, et al. IL-2, TNF-alpha, and leptin: local versus systemic concentrations in NSCLC patients. *Oncol Res*. 2007;16:375-81.
14. Carpagnano GE, Spanevello A, Curci C, Salerno F, Palladino GP, Resta O, et al. IL-2, TNF-alpha, and leptin: local versus systemic concentrations in NSCLC patients. *Oncol Res*. 2007;16:375-81.
15. Conrad DH, Goyette J, Thomas PS. Proteomics as a method for early detection of cancer: a review of proteomics, exhaled breath condensate, and lung cancer screening. *J Gen Intern Med*. 2008;23 Suppl 1:78-84.

16. Iyer R, Bharthuar A. A review of erlotinib--an oral, selective epidermal growth factor receptor tyrosine kinase inhibitor. *Expert Opin Pharmacother*. 2010;11:311-20.
17. Barreiro E, Fermoselle C, Mateu-Jimenez M, Sanchez-Font A, Pijuan L, Gea J, et al. Oxidative stress and inflammation in the normal airways and blood of patients with lung cancer and COPD. *Free Radic Biol Med*. 2013;65:859-71.
18. Barreiro E, Peinado VI, Galdiz JB, Ferrer E, Marin-Corral J, Sanchez F, et al. Cigarette smoke-induced oxidative stress: A role in chronic obstructive pulmonary disease skeletal muscle dysfunction. *Am J Respir Crit Care Med*. 2010;182:477-88.
19. Fermoselle C, Rabinovich R, Ausin P, Puig-Vilanova E, Coronell C, Sanchez F, et al. Does oxidative stress modulate limb muscle atrophy in severe COPD patients? *Eur Respir J*. 2012;40:851-62.
20. Pignatelli B, Li CQ, Boffetta P, Chen Q, Ahrens W, Nyberg F, et al. Nitrated and oxidized plasma proteins in smokers and lung cancer patients. *Cancer Res*. 2001;61:778-84.
21. Masri FA, Comhair SA, Koeck T, Xu W, Janocha A, Ghosh S, et al. Abnormalities in nitric oxide and its derivatives in lung cancer. *Am J Respir Crit Care Med*. 2005;172:597-605.
22. Esme H, Cemek M, Sezer M, Saglam H, Demir A, Melek H, et al. High levels of oxidative stress in patients with advanced lung cancer. *Respirology*. 2008;13:112-6.
23. Lawless MW, O'Byrne KJ, Gray SG. Targeting oxidative stress in cancer. *Expert Opin Ther Targets*. 2010;14:1225-45.
24. Sharma S, Kelly TK, Jones PA. Epigenetics in cancer. *Carcinogenesis*. 2010;31:27-36.
25. Lawless MW, O'Byrne KJ, Gray SG. Oxidative stress induced lung cancer and COPD: opportunities for epigenetic therapy. *J Cell Mol Med*. 2009;13:2800-21.
26. Lawless MW, Norris S, O'Byrne KJ, Gray SG. Targeting histone deacetylases for the treatment of disease. *J Cell Mol Med*. 2009;13:826-52.

27. Mizuno S, Yasuo M, Bogaard HJ, Kraskauskas D, Natarajan R, Voelkel NF. Inhibition of histone deacetylase causes emphysema. *Am J Physiol Lung Cell Mol Physiol*. 2011;300:L402-L413.
28. Esteller M. Epigenetics in cancer. *N Engl J Med*. 2008;358:1148-59.
29. Hawes SE, Stern JE, Feng Q, Wiens LW, Rasey JS, Lu H, et al. DNA hypermethylation of tumors from non-small cell lung cancer (NSCLC) patients is associated with gender and histologic type. *Lung Cancer*. 2010;69:172-9.
30. Wang S, Wang Z. Epigenetic aberrant methylation of tumor suppressor genes in small cell lung cancer. *J Thorac Dis*. 2013;5:532-7.
31. Cazzoli R, Buttitta F, Di NM, Malatesta S, Marchetti A, Rom WN, et al. microRNAs derived from circulating exosomes as noninvasive biomarkers for screening and diagnosing lung cancer. *J Thorac Oncol*. 2013;8:1156-62.

## **1.b. DESHABITUACIÓN TABÁQUICA**

El tabaquismo es la principal causa de enfermedad y muerte prevenible en todo el mundo. Uno de cada dos fumadores fallecerá prematuramente por una causa relacionada con el tabaquismo, fundamentalmente CP, enfermedades cardiovasculares y respiratorias, perdiendo al menos una década de expectativa de vida al compararlos con aquellos que nunca han fumado. Dejar de fumar tiene una repercusión considerable en cuanto a la esperanza de vida, la reducción de la morbilidad y la disminución de los costes de asistencia sanitaria asociados al tratamiento de las enfermedades relacionadas con el consumo de tabaco (1). El CP constituye una importante causa de muerte en todo el mundo con más de 1,3 millones de fallecimientos al año, significando el CPCNP más del 80% del total de los tumores primarios del pulmón (2).

Una parte significativa de los pacientes con CP, tienen una historia previa de consumo de tabaco, muchos están fumando en el momento del diagnóstico y continúan fumando incluso después de su diagnóstico. Se ha comprobado que continuar fumando después del diagnóstico de CP, conlleva múltiples consecuencias negativas para estos pacientes, como son el aumento de la toxicidad del tratamiento y disminución de su eficacia. En general, los pacientes que

continúan fumando después del diagnóstico tienen peores resultados que los pacientes que se mantienen abstinentes. Sabiendo esto, los médicos deben alentar a dejar de fumar en este subgrupo de pacientes (3).

Aunque el tabaco es un agente causal bien establecido en el CP, no existe mucha investigación sobre la evaluación de los efectos del consumo de tabaco después de un diagnóstico de cáncer. Una evaluación general de los efectos del uso continuado del tabaco demuestra que el tabaco aumenta la toxicidad del tratamiento del cáncer, la recurrencia, segundos tumores primarios, y la mortalidad en los pacientes con cáncer. Pocos estudios han informado acerca de los posibles beneficios de la cesación después de un diagnóstico de cáncer, pero los datos sugieren la mejoría del pronóstico, mejora la supervivencia y la evolución con el tratamiento, en pacientes con CP que dejan de fumar. La mejora de la eficacia del tratamiento para dejar el tabaco y el acceso al apoyo para el abandono ha sido escasamente investigado en el ámbito de la oncología en comparación con la población general, sin embargo, los pacientes con CP son receptivos a las intervenciones para dejar de fumar (4). Se necesitan futuros estudios para comprender los efectos del abandono del tabaco sobre la biología del cáncer que ayuden a definir el mejor enfoque a fin de fomentar el abandono del tabaco, y darnos cuenta de los beneficios potenciales del abandono, teniendo en cuenta las características del paciente y el estrés asociado con el diagnóstico de CP.

### **1.b.1. Acciones dirigidas al abordaje del tabaquismo.**

#### **1.b.1.a. *Identificación del fumador y efectos sobre la intervención clínica.***

Es necesario implantar en las consultas un sistema que asegure que a todos los pacientes y en todas las visitas clínicas se les va a interrogar y a documentar acerca del consumo de tabaco. Añadir a los signos vitales (tensión arterial, pulso, peso, temperatura, frecuencia respiratoria) el consumo de tabaco (fumador actual, exfumador, nunca fumador). Se ha demostrado que la aplicación de sistemas clínicos diseñados para incrementar y mejorar la evaluación y la documentación del hábito tabáquico aumenta de modo significativo las tasas de intervención de los profesionales sanitarios sobre sus pacientes fumadores (5). El diagnóstico de cáncer ha sido denominado como una “situación idónea” y tanto los médicos como el personal de enfermería tenemos una oportunidad singular para aprovecharla incrementando la motivación de los pacientes para el abandono del tabaco.

### ***Recomendación***

- Se debe preguntar a todos los pacientes si fuman, y se debe documentar su hábito tabáquico en la Historia Clínica. Se ha demostrado que los sistemas clínicos de selección, como la ampliación de los signos vitales de modo que incluya el hábito tabáquico o el uso de otros sistemas de recuerdo, como pegatinas para las historias o avisos del ordenador, incrementan significativamente las tasas de intervención por los profesionales sanitarios (Grado 1A).

1.b.1.b. *Las intervenciones terapéuticas para ayudar a los fumadores a dejar de fumar deben combinar el asesoramiento psicológico con la farmacoterapia.*

El tratamiento farmacológico para la adicción de la nicotina es a la vez eficaz y seguro en una variedad de poblaciones, incluyendo los pacientes con enfermedad cardiovascular. Los fármacos de primera elección son los más seguros y eficaces para el tratamiento del tabaquismo y han sido aprobados por la *Food and Drug Administration USA* (FDA) para este uso, excepto si hay contraindicaciones y en poblaciones específicas para las cuales no hay datos de eficacia suficientes (p. ej., embarazadas, fumadores leves y adolescentes). Disponemos de 7 fármacos de primera línea que aumentan de forma fiable a largo plazo las tasas de abstinencia de fumar e incluyen terapia sustitutiva con nicotina –TSN- (chicles, parches, inhalador, pastillas y spray nasal de nicotina), bupropion, y la vareniclina. Los médicos también deben considerar la terapia combinada que ha demostrado ser eficaz y segura (5). La medida del efecto para cada una de las opciones de medicamentos, tanto en monoterapia como en combinación, se resume en la tabla 1.

Los últimos meta-análisis demuestran que los fármacos más eficaces y seguros para el abandono del tabaco son la TSN, bupropion y vareniclina. En una reciente revisión que analiza 12 meta-análisis en los que se evaluaron 267 ensayos clínicos que incluyeron 101.804 fumadores, se observó que la eficacia de los diferentes fármacos fue para la TSN (OR 1,84; IC 95%: 1,71-1,99), bupropion (OR 1,82; IC 85%: 1,60-2,06) y vareniclina (OR 2,88; IC 95%: 2,40-3,47). Vareniclina fue en comparación, superior a bupropion y a TSN en monoterapia, pero no fue más efectiva a la TSN combinada (OR 1,06; IC 95%: 0,75-1,48), y esta última combinación fue también superior a la TSN en monoterapia (6).



Tabla 1. Eficacia y tasas de abstinencia de varias medicaciones y combinaciones en comparación con placebo 6 meses después del abandono (5).

| Medicación                                                                     | Número de grupos | Razón de posibilidades estimada (IC del 95%) | Tasa de abstinencia estimada (IC del 95%) |
|--------------------------------------------------------------------------------|------------------|----------------------------------------------|-------------------------------------------|
| Placebo                                                                        | 80               | 1,0                                          | 13,8                                      |
| <b>MONOTERAPIAS</b>                                                            |                  |                                              |                                           |
| Vareniclina (2g/día)                                                           | 5                | 3,1 (2,5 3,8)                                | 33,2 (28,0 37,8)                          |
| Spray nasal de nicotina                                                        | 4                | 2,3 (1,7 3,0)                                | 26,7 (21,5 32,7)                          |
| Parche de nicotina a dosis altas (>25 mg) (duración estándar y largo duración) | 4                | 2,3 (1,7 3,0)                                | 26,5 (21,3 32,5)                          |
| Chicle de nicotina a largo plazo (>14 semanas)                                 | 6                | 2,2 (1,5 3,2)                                | 26,1 (19,7 33,6)                          |
| Vareniclina 1 mg/día                                                           | 3                | 2,1 (1,5 3,0)                                | 25,4 (19,6 32,2)                          |
| Inhalador de nicotina                                                          | 6                | 2,1 (1,5-2,9)                                | 24,8 (19,1-31,6)                          |
| Clonidina                                                                      | 3                | 2,1 (1,2 3,7)                                | 25,0 (15,7 37,3)                          |
| Bupropión SR                                                                   | 26               | 2,0 (1,8 2,2)                                | 24,2 (22,2 25,4)                          |
| Parche de nicotina (6-14 semanas)                                              | 32               | 1,9 (1,7 2,2)                                | 23,4 (21,3 25,8)                          |
| Parche de nicotina a largo plazo (>14 semanas)                                 | 10               | 1,9 (1,7-2,3)                                | 23,7 (21,0-25,6)                          |
| Nortriptilina                                                                  | 5                | 1,8 (1,3 2,6)                                | 22,5 (16,8 29,4)                          |
| Chicle de nicotina (6-14 semanas)                                              | 15               | 1,5 (1,2 1,7)                                | 19,0 (16,5 21,9)                          |
| <b>TERAPIAS COMBINADAS</b>                                                     |                  |                                              |                                           |
| Parche (largo plazo; >14 semanas) + TSN (chicle o spray) a demanda             | 3                | 3,6 (2,5 5,2)                                | 36,5 (28,6 45,3)                          |
| Parche + bupropión SR                                                          | 3                | 2,5 (1,9 3,4)                                | 28,9 (23,5 35,1)                          |
| Parche + nortriptilina                                                         | 2                | 2,3 (1,3-4,2)                                | 27,3 (17,2-40,4)                          |
| Parche + inhalador de nicotina                                                 | 2                | 2,2 (1,3 3,6)                                | 25,8 (17,4 35,5)                          |
| Parche + antidepressivos de segunda generación (paroxetina, venlafaxina)       | 3                | 2,0 (1,2 3,4)                                | 24,3 (16,1 35,0)                          |

### Recomendación

- La terapia farmacológica de primera línea asociada al asesoramiento psicológico ha demostrado ser coste-efectiva y se deben proporcionar a todos los fumadores (Grado 1A).

### 1.b.2. Interrogantes clínicas y recomendaciones.

De acuerdo con los métodos y recomendaciones analizados en la 3ª Edición de la *American College of Chest Physicians (ACCP) Lung Cancer Guidelines* podemos establecer diversas preguntas y recomendaciones entre los pacientes fumadores (7,8).

1.b.2.a. *¿Influye el uso de la Tomografía Computarizada de baja dosis (TCBD) como modalidad de cribado del cáncer de pulmón para impulsar el abandono del tabaco?*

Diversos estudios han evaluado la eficacia de la intervención sobre el tabaquismo asociada al cribado de cáncer de pulmón mediante TCBD (9-16). Los resultados son muy limitados ante la falta de grupos control, y existen serias dificultades para valorar su consecuencia real, lo que demuestra que no se dispone actualmente de evidencia de que o bien el cribado por sí solo o el hallazgo de una lesión no maligna tenga un efecto sustancial en las tasas de abandono, incluso cuando va acompañada de intervención mínima (tabla 2).

*Recomendación*

- Se recomienda que a los fumadores sometidos a cribado con TCBD se les proporcione consejo para dejar de fumar asociado a farmacoterapia (Grado 1B).

Tabla 2. Cribado con TCBD, intervención, estatus tabáquico, actitudes y resultados. Modificado de la referencia bibliográfica 8.

|                             |         |           |                       | % Consumo de tabaco al inicio |       | % Intento de abandono |       | % Abstinencia   |                 | % Recaidas en antiguos fumadores |                 |
|-----------------------------|---------|-----------|-----------------------|-------------------------------|-------|-----------------------|-------|-----------------|-----------------|----------------------------------|-----------------|
| Autor                       | N Total | % Hombres | Tipo de intervención  | TCBD                          | Contr | TCBD                  | Contr | TCBD            | Contr           | TCBD                             | Contr           |
| Schnoll <sup>9</sup>        | 55      | 0         | Consejo               | 100                           | --    | --                    | --    | 16 <sup>a</sup> | --              | --                               | --              |
| Cox <sup>10</sup>           | 1475    | 53        | Ninguna               | 61                            | --    | --                    | --    | 14 <sup>b</sup> | --              | 10                               | --              |
| Clark <sup>11</sup>         | 85      | 54        | Internet              | 61                            | --    | 68                    | --    | 5 <sup>b</sup>  | --              | --                               | --              |
|                             | 86      | 48        | Material de autoayuda | 61                            | --    | 48                    | --    | 10 <sup>b</sup> | --              | --                               | --              |
| Ashraf <sup>12</sup>        | 4104    | 55        | Consejo breve         | 75                            | 77    | --                    | --    | 11 <sup>b</sup> | 10 <sup>b</sup> | 10 <sup>c</sup>                  | 11 <sup>c</sup> |
| Styn <sup>13</sup>          | 2094    | 49        | Consejo breve         | 100                           | --    | 59                    | --    | 16 <sup>b</sup> | --              | --                               | --              |
| Anderson <sup>14</sup>      | 2083    | 45        | Consejo breve         | 35                            | --    | --                    | --    | 29 <sup>d</sup> | --              | 4 <sup>e</sup>                   | --              |
| MacRedmond <sup>15</sup>    | 449     | --        | Consejo breve         | 69                            | --    | --                    | --    | 19 <sup>f</sup> | --              | 2                                | --              |
| Van der Aalst <sup>16</sup> | 1284    | 100       | Folleto informativo   | 91                            | 78    | --                    | --    | 14 <sup>f</sup> | 16 <sup>f</sup> | --                               | --              |

Contr = control. TCBD = Tomografía computarizada de baja dosis. <sup>a</sup> Tasa de abstinencia al mes de seguimiento. <sup>b</sup> Tasa de abstinencia al año de seguimiento. <sup>c</sup> Recaidas al año de seguimiento. <sup>d</sup> Tasa de abstinencia prolongada. <sup>e</sup> Recaidas al 6º año de seguimiento. <sup>f</sup> Tasa de abstinencia al 2º año de seguimiento.

### 1.b.2.b. ¿Como deberíamos afrontar el abandono del tabaco en los pacientes con CP que van a ser intervenidos quirúrgicamente?

Un porcentaje considerable de pacientes diagnosticados de CP pueden ser candidatos a cirugía. El consumo de tabaco potencia la aparición de complicaciones en el postoperatorio. El apoyo psicológico y la farmacoterapia, incluyendo TSN, facilitan las posibilidades de abstinencia disminuyendo el riesgo quirúrgico (17). Varios estudios (18-22) han evaluado el abandono del tabaco en el preoperatorio sobre la incidencia de complicaciones en pacientes con CP e incluyen algunas consideraciones sobre las mismas (tabla 3). Entre los resultados, los diferentes autores concluyen que los que abandonaron el tabaco sufrieron menos complicaciones postquirúrgicas con una menor estancia y mortalidad hospitalaria. Los pacientes que van a ser sometidos a cirugía por CP representan un gran oportunidad para que al diagnóstico y en el periodo perioperatorio, se aborde su tabaquismo. Aparte del tratamiento farmacológico y el consejo, es aconsejable además la entrega de material de autoayuda, folletos informativos sobre el riesgo de fumar y la cirugía, reforzado si es factible con un seguimiento de apoyo telefónico.

Tabla 3. Influencia del abandono sobre los resultados en la cirugía del CP. Modificado de la referencia 8.

| Referencia                    | N     | % Hombres | % Neumonectomía | Complicación pulmonar Postoperatoria<br>Condición de fumador (%) |          |           |       |
|-------------------------------|-------|-----------|-----------------|------------------------------------------------------------------|----------|-----------|-------|
|                               |       |           |                 | Actual                                                           | Reciente | Exfumador | Nunca |
| Mason 2009 <sup>18</sup>      | 7,990 | 48        | 7               | 7                                                                | 6        | 6         | 3     |
| Barrera 2005 <sup>19</sup>    | 300   | 48        | 5               | 23                                                               | 23       | 19        | 8     |
| Nakagawa 2001 <sup>20</sup>   | 280   | 58        | 4               | 43                                                               | 54       | 35        | 24    |
| Vaporciyan 2002 <sup>21</sup> | 261   | 70        | 100             | --                                                               | 22       | 9         | 15    |
| Groth 2009 <sup>22</sup>      | 120   | 100       | 10              | 44                                                               | 19       | 42        | --    |

### Recomendaciones

- Para mejorar las tasas de abandono en este grupo de pacientes, es recomendable el uso de terapia farmacológica (Grado 1B).
- Se recomienda únicamente el consejo para dejar de fumar, en aquellos pacientes en los que la farmacoterapia esté contraindicada o sea rechazada (Grado 2C).

- La elección del momento idóneo del abandono del hábito de fumar no parece modificar el riesgo de complicaciones postoperatorias, sí se recomienda que se inicie el tratamiento en el período preoperatorio (Grado 2C).

1.b.2.c. *¿En los pacientes que van a ser sometidos a quimioterapia, cómo debemos abordar el abandono del tabaco?*

El empleo de la quimioterapia (QT) en estos pacientes puede dificultar el enfoque del abandono del tabaquismo. En estos casos debemos emplear la terapia cognitivo conductual asociada al tratamiento farmacológico. En aquellos pacientes que tengan poca motivación estaría indicada la entrevista motivacional. Muchos de estos pacientes presentan síntomas depresivos, parece ser que el uso de bupropion mejora las tasas de abstinencia y la calidad de vida en estos pacientes en comparación con aquellos tratados con placebo (23).

*Recomendaciones*

- Se recomienda tanto el consejo como la terapia farmacológica a fin de mejorar las tasas de abandono a este grupo de pacientes (Grado 1B).
- Se recomienda bupropion en aquellos pacientes que presenten síntomas depresivos (Grado 2B).

1.b.2.d. *¿Cuál es el efecto de dejar de fumar en pacientes con cáncer de pulmón sometidos a radioterapia?*

Debido a que la radioterapia (RT) es una intervención que puede garantizar la curación, en prevención de complicaciones, está justificada la farmacoterapia para el abandono del tabaco. Una revisión retrospectiva demostró que continuar fumando aumentó el riesgo de complicaciones de la RT, con hospitalizaciones más prolongadas, mucositis y elevadas tasas de necrosis ósea post-radiación (24).

*Recomendación*

- Recomendamos consejo más farmacoterapia a los pacientes sometidos a RT (Grado 1B).

## Resumen de recomendaciones

| Recomendación                                                                                                                                                                                                                                                                                                                                                                                                                                             | Grado |
|-----------------------------------------------------------------------------------------------------------------------------------------------------------------------------------------------------------------------------------------------------------------------------------------------------------------------------------------------------------------------------------------------------------------------------------------------------------|-------|
| Se debe preguntar a todos los pacientes si fuman, y se debe documentar su hábito tabáquico en la Historia Clínica. Se ha demostrado que los sistemas clínicos de selección, como la ampliación de los signos vitales de modo que incluya el hábito tabáquico o el uso de otros sistemas de recuerdo, como pegatinas para las historias o avisos del ordenador, incrementan significativamente las tasas de intervención por los profesionales sanitarios. | 1A    |
| La terapia farmacológica de primera línea asociada al asesoramiento psicológico ha demostrado ser coste-efectiva y se deben proporcionar a todos los fumadores.                                                                                                                                                                                                                                                                                           | 1A    |
| Se recomienda que a los fumadores sometidos a cribado con TCBD se les proporcione consejo para dejar de fumar asociado a farmacoterapia.                                                                                                                                                                                                                                                                                                                  | 1B    |
| Para mejorar las tasas de abandono en el grupo de pacientes que van a ser intervenidos quirúrgicamente, es recomendable el uso de terapia farmacológica.                                                                                                                                                                                                                                                                                                  | 1B    |
| Se recomienda únicamente el consejo para dejar de fumar, en aquellos pacientes que van a ser intervenidos quirúrgicamente en los que la farmacoterapia esté contraindicada o sea rechazada.                                                                                                                                                                                                                                                               | 2C    |
| La elección del momento idóneo del abandono del hábito de fumar no parece modificar el riesgo de complicaciones postoperatorias, sí se recomienda que se inicie el tratamiento en el período preoperatorio.                                                                                                                                                                                                                                               | 2C    |
| Se recomienda tanto el consejo como la terapia farmacológica a fin de mejorar las tasas de abandono al grupo de pacientes que van a ser sometidos a QT.                                                                                                                                                                                                                                                                                                   | 1B    |
| Se recomienda bupropion en aquellos pacientes que van a ser sometidos a QT y que presenten síntomas depresivos.                                                                                                                                                                                                                                                                                                                                           | 2B    |
| Recomendamos consejo más farmacoterapia a los pacientes sometidos a RT.                                                                                                                                                                                                                                                                                                                                                                                   | 1B    |

## Bibliografía

1. Jha P, Ramasundarahettige C, Landsman V, Rostron B, Thun M, Anderson RN, et al. 21st-century hazards of smoking and benefits of cessation in the United States. *N Engl J Med*. 2013;368:341-50.
2. Jemal A, Bray F, Center MM, Ferlay J, Ward E, Forman D. Global cancer statistics. *CA Cancer J Clin*. 2011;61:69-90.

3. Waller LL, Weaver KE, Petty WJ, Miller AA. Effects of continued tobacco use during treatment of lung cancer. *Expert Rev Anticancer Ther*. 2010;10:1569-75.
4. Gritz ER, Toll BA, Warren GW. Tobacco use in the oncology setting: advancing clinical practice and research. *Cancer Epidemiol Biomarkers Prev*. 2014;23:3-9.
5. Fiore MC, Jaén CR, Baker TB, Bailey WC, Benowitz NL, Curry SJ, et al. Treating Tobacco Use and Dependence: 2008 Update. Clinical Practice Guideline. Rockville, MD: US Department of Health and Human Services. Public Health Service; May, 2008. Traducción al español: Guía de tratamiento del tabaquismo. Jimenez Ruiz CA, Jaén CR (Coordinadores de la traducción). Sociedad Española de Neumología y Cirugía Torácica. SEPAR. Mayo 2010.
6. Cahill K, Stevens S, Perera R, Lancaster T. Pharmacological interventions for smoking cessation: an overview and network meta-analysis. *Cochrane Database Syst Rev*. 2013 May 31;5:CD009329. doi: 10.1002/14651858.CD009329.pub2.
7. Lewis SZ, Diekemper R, Addrizzo-Harris D. Methodology for development of guidelines for lung cancer: diagnosis and management of lung cancer, 3rd ed: American College of Chest Physicians evidence-based clinical practice guidelines. *Chest*. 2013;143(Suppl):41S-50S .
8. Leone FT, Evers-Casey S, Toll BA, Vachani A. Treatment of Tobacco use in lung cancer. Diagnosis and management of lung cancer, 3rd ed: American College of Chest Physicians evidence-based clinical practice guidelines. *Chest*. 2013;143(Suppl):61S-77S.
9. Schnoll RA, Miller SM, Unger M, McAleer C, Halbherr T, Bradley P. Characteristics of female smokers attending a lung cancer screening program: a pilot study with implications for program development. *Lung Cancer*. 2002;37:257-65.
10. Cox LS, Clark MM, Jett JR, Patten CA, Schroeder DR, Nirelli LM, et al. Change in smoking status after spiral chest computed tomography scan screening. *Cancer*. 2003;98:2495-501.
11. Clark MM , Cox LS , Jett JR , Patten CA, Schroeder DR, Nirelli LM, et al. Effectiveness of smoking cessation self-help materials in a lung cancer screening population. *Lung Cancer*. 2004;44:13-21.
12. Ashraf H, Tønnesen P, Holst Pedersen J, Dirksen A, Thorsen H, Døssing M. Effect of CT screening on smoking habits at 1-year follow-up in the Danish Lung Cancer Screening Trial (DLCST). *Thorax*. 2009;64:388-92.
13. Styn MA, Land SR, Perkins KA, Wilson DO, Romkes M, Weissfeld JL. Smoking behavior 1 year after computed tomography screening for lung cancer: effect of physician referral for abnormal CT findings. *Cancer Epidemiol Biomarkers Prev*. 2009;18:3484-89.

- 14 . Anderson CM, Yip R, Henschke CI, Yankelevitz DF, Ostroff JS, Burns DM, et al . Smoking cessation and relapse during a lung cancer screening program. *Cancer Epidemiol Biomarkers Prev.* 2009;18:3476-83.
15. MacRedmond R, McVey G, Lee M, Costello RW, Kenny D, Foley C, et al . Screening for lung cancer using low dose CT scanning: results of 2 year follow up. *Thorax.* 2006;61: 54-56.
16. Van der Aalst CM, de Koning HJ, van den Bergh KAM , Willemsen MC, van Klaveren RJ. The effectiveness of a computer-tailored smoking cessation intervention for participants in lung cancer screening: a randomised controlled trial. *Lung Cancer.* 2012;76:204-10.
17. Khullar D, Maa J. The impact of smoking on surgical outcomes. *J Am Coll Surg.* 2012;215:418-26.
18. Mason DP, Subramanian S, Nowicki ER, Grab JD, Murthy SC, Rice TW, et al. Impact of smoking cessation before resection of lung cancer: a Society of Thoracic Surgeons General Thoracic Surgery Database study. *Ann Thorac Surg.* 2009;88:362-70.
19. Barrera R, Shi W, Amar D, Thaler HT, Gabovich N, Bains MS, et al. Smoking and timing of cessation: impact on pulmonary complications after thoracotomy. *Chest.* 2005;127:1977-83.
20. Nakagawa M, Tanaka H, Tsukuma H, Kishi Y. Relationship between the duration of the preoperative smoke-free period and the incidence of postoperative pulmonary complications after pulmonary surgery. *Chest.* 2001;120:705-10.
21. Vaporciyan AA, Merriman KW, Ece F, Roth JA, Smythe WR, Swisher SG, et al. Incidence of major pulmonary morbidity after pneumonectomy: association with timing of smoking cessation. *Ann Thorac Surg.* 2002;73:420-25.
22. Groth SS, Whitson BA, Kuskowski MA, Holmstrom AM, Rubins JB, Kelly RF . Impact of preoperative smoking status on postoperative complication rates and pulmonary function test results 1-year following pulmonary resection for non small cell lung cancer. *Lung Cancer.* 2009;64:352-57.
23. Schnoll RA, Martinez E, Tatum KL, Weber DM, Kuzla N, Glass M, et al. A bupropion smoking cessation clinical trial for cancer patients. *Cancer Causes Control.* 2010;21:811-820.
24. Zevallos JP, Mallen MJ, Lam CY, Karam-Hage M, Blalock J, Wetter DW, et al. Complications of radiotherapy in laryngopharyngeal cancer: effects of a prospective smoking cessation program. *Cancer.* 2009;115:4636-44.

## 1.c. CRIBADO

La experiencia con el cribado del CP comienza en la década de los años sesenta del siglo pasado. Lamentablemente, los primeros intentos de demostrar un beneficio atribuible al cribado fueron un fracaso (1-3). Se realizaron en total 5 estudios de asignación aleatoria con herramientas de cribado rudimentarias como la radiografía de tórax y la citología de esputo. Casi todos compararon la radiografía anual con cribado más frecuente (entre 4 y 6 meses), y ninguno demostró un beneficio claro a favor del grupo de intervención. El estudio más conocido y eje histórico de la oposición al cribado es el conocido como *Mayo Lung Project* (MLP) que comparó la realización de radiografías de tórax y citología de esputo cada 4 meses con una radiografía anual. El MLP obtuvo unos resultados intrigantes, entre los que destaca un aumento significativo de la incidencia de cáncer en el grupo de cribado (17%). Los resultados de un análisis reciente confirman un exceso de 69 cánceres después de más de 25 años de seguimiento en el grupo de cribado frecuente comparado con el grupo control (4). Este dato ha sido atribuido históricamente al sobrediagnóstico (5). Un estudio contemporáneo del MLP realizado en Checoslovaquia también detectó más cánceres por cribado con idéntico hallazgo en cuanto a la mortalidad (1). El resultado definitivo tras 15 años de seguimiento tampoco resultó favorable a la radiografía convencional como herramienta de cribado (6). La publicación reciente de los resultados del estudio *Prostate, Lung, Colorectal and Ovarian cancer randomized study* (PLCO) pone punto final al debate generado en torno al cribado con radiografía de tórax (7). El PLCO demostró que el cribado con esta técnica de imagen no reduce la mortalidad por CP. Se trató de un estudio con más de 150.000 participantes, incluyendo no fumadores, en el que la incidencia acumulada de cáncer de pulmón, mortalidad, histología, y estadio tumoral fueron similares en dos grupos de asignación aleatoria tras 4 años consecutivos de cribado con radiografía de tórax y 13 años de seguimiento. Por lo tanto, el conjunto de la evidencia científica, incluyendo los resultados del PLCO y de los 5 estudios aleatorizados anteriormente mencionados, demuestra que la radiografía de tórax anual no reduce la mortalidad por CP y no es recomendable como herramienta de cribado.

### 1.c.1. TC de tórax de baja dosis. Evidencia.

El entusiasmo y las expectativas generadas por la tomografía computarizada (TC) como herramienta de cribado se han visto recompensadas recientemente con la publicación de los



resultados del *National Lung Screening Trial* (NLST) patrocinado por el NCI norteamericano (8). Los datos de este estudio se unen a la evidencia aportada por ocho estudios de asignación aleatoria y más de una docena de cohortes dedicadas al cribado de CP mediante TC de baja dosis de radiación ( $\leq 1,5$  mSv) y suponen un claro cambio de tendencia. El NLST contó con la participación de 53.454 fumadores o exfumadores de edades comprendidas entre los 55 y 74 años, con un consumo tabáquico acumulado de al menos 30 paquetes-año. El período máximo de abstinencia para ser considerado apto para el estudio se fijó arbitrariamente en 15 años. En el estudio participaron 33 centros de los EEUU, miembros de dos redes especializadas en imagen y el manejo y tratamiento del CP (ACRIN y LSS). Los radiólogos participantes recibieron formación específica, aunque no se utilizó un protocolo concreto de seguimiento para el manejo consensuado de los hallazgos por TC. En comparación con un censo contemporáneo de fumadores, los participantes en el NLST eran más frecuentemente exfumadores (aproximadamente el 50%) y tenían un nivel educativo mayor que la media. Además, casi un 90% de los mismos eran de raza blanca (8). El diseño del NLST incluyó la realización de una radiografía de tórax anual al grupo control, hecho condicionado por la incertidumbre acerca de los resultados, entonces desconocidos, del PLCO. Mención aparte merecen los dos estudios europeos ya concluidos y de asignación aleatoria conocidos como el *Detection and Screening of Early Lung Cancer by Novel Imaging Technology and Molecular Essays Trial* (DANTE) y el *Danish Lung Cancer Screening Trial* (DLCST) que a diferencia del NLST obviaron la radiografía de tórax en el grupo control. Ambos estudios contaban con menor tamaño muestral que el patrocinado por el NCI pero prolongaron el cribado durante mas tiempo (5 años) (9,10).

El hallazgo más significativo del NLST fue una reducción en la mortalidad por CP de un 20% en el grupo de cribado comparado con el grupo control. Ni el DANTE ni el DLCST obtuvieron un resultado tan positivo, aunque la suma de los tres estudios se mantiene muy favorable al cribado, contabilizándose 291 muertes en los grupos de TC de baja dosis frente a 474 en los grupos control (11). El resto de los estudios aleatorizados de cribado, entre los que destacan el *Nederlands-Leuvens Longkanker Screenings Onderzoek* (NELSON) europeo el estudio alemán conocido como LUSI, el británico UKLS y otro Italiano (ITALUNG) aportarán un total de mas de 20.000 participantes y sus resultados serán conocidos en breve (10-14).

Cabe destacar que los estudios iniciales de cribado por TC demostraron que esta técnica de imagen detecta 10 veces más nódulos que la radiografía convencional (15,16). Por lo tanto, su mayor problema es la especificidad. Para evitar catalogar un gran número de nódulos benignos como positivos, el NELSON cuenta con la opción de realizar una TC a corto plazo en

aquellos sujetos con hallazgos indeterminados en la TC basal. El análisis volumétrico de los nódulos supone otra novedad y facilita la determinación del tiempo de duplicación de un nódulo indeterminado para clasificarlo como positivo o negativo. La realización de dicha TC redundaba en una notable disminución de la tasa de falsos positivos (24,2% en la primera ronda del NLST vs 2,6% en el NELSON) (17). En todo caso, la gran cantidad de falsos positivos descritos por los investigadores del NLST no se tradujo en un aumento importante de la morbilidad en sujetos con nódulos benignos. Solo un 2% de los participantes precisaron una biopsia durante los tres años de cribado y menos del 1% de los pacientes sin cáncer sometidos a una biopsia sufrieron complicaciones reseñables. Este hecho se debe a que la inmensa mayoría de los hallazgos positivos fueron objeto de seguimiento radiológico y que por lo tanto su evolución radiológica permitió evitar intervenciones cruentas.

La experiencia de las cohortes internacionales es tranquilizadora en este sentido. En la más destacada por número de sujetos participantes y trayectoria científica, conocida como *International Early Lung Cancer Action Program* (iELCAP), se demuestra que el uso de un protocolo de actuación predeterminado para la evaluación y seguimiento de los nódulos pulmonares detectados por cribado con TC garantiza que más de un 90% de las biopsias realizadas serán diagnósticas de un CP y por lo tanto estarán bien indicadas (18). De esta forma resulta factible evitar que la inmensa mayoría de sujetos con un resultado positivo experimenten complicaciones a consecuencia de una biopsia a pesar de no tener cáncer. No obstante, es obvio que el valor predictivo positivo de la TC tanto en el NLST como en otros estudios es bajo y representa un problema de primera magnitud para la implantación de cribado a gran escala. Por ello, algunos autores recomiendan limitar la incorporación de programas de cribado a centros con amplia experiencia en el manejo de nódulos pulmonares y su abordaje multidisciplinar (5). Se trata de distinguir entre nódulos benignos y malignos en una población de alto riesgo con una prevalencia de cáncer de entre 1-2% y gran número de nódulos pulmonares indeterminados con tamaños superiores a los 4-6 mm que suponen el límite de lo considerado seguro para seguimiento con TC anual. En el NLST, por ejemplo, fue necesario cribar a más de 300 sujetos para salvar una vida con la consiguiente aparición de más de 100 falsos positivos. Es indudable que aunque el hallazgo de un nódulo sospechoso no suponga la realización inmediata de una biopsia, puede conllevar la aparición de ansiedad en el sujeto sano y por supuesto el coste adicional de más pruebas de imagen además del riesgo que conlleva la radiación adicional recibida por este motivo (por ejemplo la realización de una PET-TC o de pruebas de imagen seriadas). Aun así, es importante reiterar, que en la mayoría de los casos, solo el crecimiento de un nódulo condiciona la sospecha de malignidad y debe ser esgrimido como criterio para

intervenir. Además, si el protocolo se ciñe a los sujetos de mayor riesgo, como pacientes de mayor edad con enfisema, el número de cribajes necesario para salvar una vida se reduce a la mitad (19). En relación a esta última afirmación, varios estudios, incluyendo el propio NLST han demostrado la importancia del enfisema como factor de riesgo que permite optimizar la selección de sujetos, y por ende reducir los costes, los falsos positivos y la ansiedad atribuibles al cribado (19-22).

Además del gran número de falsos positivos detectados por TC, preocupa la posibilidad del sobrediagnóstico. Como ya hemos comentado, se trata de un hecho determinante en la interpretación de los intrigantes resultados del MLP y se ha citado como un sesgo importante por varios autores a la hora de matizar su apoyo u oponer resistencia a la implantación a gran escala de programas de cribado por TC (23,24). Aunque el aumento de números de cáncer en el grupo de cribado del MLP pudo verse alterado por el diseño del estudio, otros estudios también encontraron un mayor número de cánceres detectados por el cribado en comparación con un grupo control, incluyendo el NLST. Sin embargo, otros estudios entre los que destacan el PLCO y sobre todo la cohorte iELCAP, no coinciden con estos hallazgos. En la publicación de sus resultados originales, iELCAP otorga especial importancia a la invasividad histológica de la inmensa mayoría de cánceres detectados por el cribado y sometidos a cirugía (18). De un total de 377 tumores intervenidos quirúrgicamente, 358 mostraban signos histológicos de invasión, progresión local o regional. Ninguno de los tumores detectados en la ronda de cribado anual y tan solo 19 en la ronda basal parecían histológicamente inofensivos. Además, el grupo de la Universidad de Navarra comparó los perfiles inmunohistoquímicos y moleculares de un grupo de tumores detectados por cribado con otro detectado de forma convencional, y no encontró diferencias significativas entre ambos (25). Tampoco es habitual el hallazgo de un carcinoma pulmonar incidental en estudios de necropsias de pacientes fallecidos por otra causa (26). Por último, cabe destacar la experiencia anecdótica pero llamativa de 13 pacientes diagnosticados de CP por cribado en la cohorte iELCAP que se negaron a tratamiento quirúrgico. Todos ellos fallecieron a consecuencia del cáncer (18).

Mención aparte merece el riesgo de la radiación. Algunos autores, estiman que se trata de un riesgo real, aunque inferior en magnitud al beneficio del cribado (5). Basándose en modelos matemáticos surgidos de la experiencia atómica de Hiroshima y Nagasaki, y en la evidencia de varias cohortes de sujetos sometidos a múltiples pruebas de imagen y seguimiento prolongado, calculan que el riesgo de producirse un CP atribuible a la radiación recibida con motivo del cribado por TC es de un cáncer por cada 2500 TC (24,5). Sin embargo, otros autores consideran altamente improbable que exista un riesgo razonable atribuible a dosis inferiores a

los 100 mSV, muy por encima del total recibido en estudios como el NLST (8 mSv) (27). La Asociación Americana de Física Médica se ha pronunciado recientemente al respecto, e insiste en que dosis médicas inferiores a los 50-100 mSv conllevan un riesgo extremadamente bajo o inexistente (28).

Finalmente, el tabaquismo es un factor fundamental en muchos aspectos relacionados con el cribado de CP. Diversos estudios sugieren que el momento del primer cribado supone una buena oportunidad para educar sobre el tabaco y, sobre todo, para ofrecer un programa de deshabituación a fumadores activos (29). Algunos estudios observacionales han destacado un aumento de las tasas de deshabituación en relación con el cribado. En el estudio NELSON, el único de asignación aleatoria en el que se ha investigado de momento la relación entre cribado y deshabituación, no se encontraron diferencias en las tasas de abstinencia entre los grupos de intervención y control (30). Estos resultados descartan la teoría sugerida por algunos de que el cribado puede dar una sensación de seguridad al fumador disminuyendo así su interés por dejar de fumar. El impacto que puedan tener cribados sucesivos con sus correspondientes recomendaciones para dejar de fumar no es conocido, aunque existen estudios recientes que sugieren una mejoría significativa de la relación entre coste y efectividad de los programas de cribado de cáncer de pulmón al incorporar la deshabituación tabáquica (31). Los datos de coste y efectividad en nuestro medio tampoco son conocidos, pero una publicación reciente analizando la relación coste-beneficio del NLST sugiere que cada año de vida atribuible al cribado costaría unos \$52,000 (IC95%; 34,000-106,000) en los EEUU (32). Como el coste del cribado radica sobre todo en la realización de las TC, es probable que en nuestro medio el análisis fuese mucho más favorable, ya que una exploración radiológica con TC de baja dosis en nuestro país cuesta aproximadamente la mitad que en los EEUU (XXXII International Conference on Lung Cancer Screening. Pamplona. España).

### *Recomendaciones*

- El cribado de CP mediante radiografía de tórax anual en pacientes de alto riesgo no es eficaz y, por lo tanto, no es recomendable (Grado 1A).
- El cribado anual mediante TC de baja dosis de radiación en individuos con alto riesgo reduce la mortalidad por CP (Grado 1B).
  - La definición de alto riesgo no está claramente establecida, pero el único estudio aleatorizado y controlado que ha demostrado una reducción en la mortalidad utilizó los siguientes criterios de inclusión: edad entre 55 y 74 años, al menos 30

paquetes-año de tabaquismo y un máximo período de abstinencia tabáquica de 15 años (Grado 1B).

- Según estudios de tipo descriptivo el enfisema y la EPOC confieren de forma independiente un aumento del riesgo de desarrollar un CP (Grado 2B).
  - El riesgo de morbilidad por procedimientos invasivos para el diagnóstico de hallazgos positivos en las TC de cribado es muy bajo (Grado 1B).
  - El riesgo de la radiación recibida con motivo del cribado probablemente es muy bajo. No existen estudios fiables al respecto y los modelos matemáticos utilizados para determinar el riesgo de la radiación ionizante son especulativos y basados en conclusiones derivadas de los efectos biológicos de la radiación atribuida a las explosiones nucleares de Hiroshima y Nagasaki. Dicho riesgo es difícil de predecir para dosis de radiación por debajo de los 50-100 mSv y puede ser inexistente (Grado 2C).
  - Se recomienda el uso de un protocolo predeterminado de seguimiento en los programas de cribado basado en las técnicas de imagen con la intención de reducir de forma significativa la tasa de falsos positivos y evitar biopsias innecesarias (Grado 1B).
- No existe evidencia suficiente para poder recomendar el número de cribados, ni el intervalo de tiempo entre ellos, a los que debe someterse un individuo de alto riesgo.
- La mayor parte de los estudios de los que se ha obtenido evidencia para las recomendaciones anteriores se han hecho con 1 cribado anual durante al menos 3 años.
- El cribado de CP proporciona una excelente oportunidad para ofrecer un programa de deshabituación tabáquica (Grado 1B). La incorporación de los programas de deshabituación a los programas de cribado puede mejorar la relación entre coste y efectividad (Grado 2C).

Notas a las recomendaciones: Los criterios de inclusión del estudio NLST mencionados en la segunda recomendación y que están siendo utilizados por la gran mayoría de guías y recomendaciones ya publicadas, son criterios que fueron seleccionados de forma arbitraria para llevar a cabo un ensayo clínico. Por lo tanto, la definición de alto riesgo utilizando estos criterios debe ser provisional hasta que dispongamos de más estudios aclaratorios.

## Resumen de recomendaciones

| Recomendación                                                                                                                                 | Grado |
|-----------------------------------------------------------------------------------------------------------------------------------------------|-------|
| El cribado de CP mediante radiografía de tórax anual en pacientes de alto riesgo no es eficaz y, por lo tanto, no es recomendable.            | 1A    |
| El cribado anual mediante TC de baja dosis de radiación en individuos con alto riesgo reduce la mortalidad por CP.                            | 1B    |
| El cribado de CP proporciona una excelente oportunidad para ofrecer un programa de deshabituación tabáquica.                                  | 1B    |
| La incorporación de los programas de deshabituación tabáquica a los programas de cribado puede mejorar la relación entre coste y efectividad. | 2C    |

## Bibliografía

1. Kubík A, Polák J. Lung cancer detection: results of a randomized prospective study in Czechoslovakia. *Cancer*. 1986;57:2427-2437.
2. Fontana RS, Sanderson DR, Woolner LB, Taylor WF, Miller WE, Muhm JR. Lung cancer screening: the Mayo program. *J Occup Med*. 1986;28:746-750.
3. Brett GZ. The value of lung cancer detection by six-monthly chest radiographs. *Thorax*. 1968;23:414-420.
4. Marcus PM, Harris A, Offord KP. Extended Lung Cancer Incidence Follow-up in the Mayo Lung Project and Overdiagnosis. *JNCI*. 2006;98:748-56.
5. Detterbeck FC, Mazzone PJ, Naidich DP, Bach PB. Screening for lung cancer: Diagnosis and management of lung cancer, 3rd ed: American College of Chest Physicians evidence-based clinical practice guidelines. *Chest*. 2013;143(5 Suppl):e78S-92S.
6. Kubik AK, Parkin DM, Zatloukal P. Czech Study on Lung Cancer Screening: post-trial follow-up of lung cancer deaths up to year 15 since enrollment. *Cancer*. 2000;89(11 Suppl):2363-2368.
7. Oken MM, Hocking WG, Kvale PA, Andriole GL, Buys SS, Church TR, et al. Screening by chest radiograph and lung cancer mortality: the Prostate, Lung, Colorectal, and Ovarian (PLCO) randomized trial. *JAMA*. 2011;306:1865-73.

8. Aberle DR, Adams AM, Berg CD, Black WC, Clapp JD, Fagerstrom RM, et al. Reduced lung-cancer mortality with low-dose computed tomographic screening. *N Engl J Med*. 2011;365:395-409.
9. Infante M, Cavuto, S, Lutman FR, Brambilla G, Chiesa G, Ceresoli G, et al. A randomized study of lung cancer screening with spiral computed tomography: three-year results from the DANTE trial. *Am J Respir Crit Care Med*. 2009;180:445-53.
10. Saghir Z, Dirksen A, Ashraf H, Bach KS, Brodersen J, Clementsen PF, et al. CT screening for lung cancer brings forward early disease. The randomised Danish lung cancer screening trial: status after five annual screening rounds with low-dose CT. *Thorax*. 2012;67:296-301.
11. Bach P, Mirkin J, Oliver T, Azzoli CG, Berry DA, Brawley OW, et al. Benefits and harms of CT screening for lung cancer: a systematic review. *JAMA*. 2012;307:2418-2429.
12. van Klaveren RJ, Oudkerk M, Prokop M, Scholten ET, Nackaerts K, Vernhout R, et al. Management of lung nodules detected by volume CT scanning. *N Engl J Med*. 2009;361:2221-2229.
13. Lopes Pegna A, Picozzi G, Mascalchi M, Maria Carozzi F, Carrozzi L, Comin C, et al. ITALUNG Study Research Group. Design, recruitment and baseline results of the ITALUNG trial for lung cancer screening with low-dose CT. *Lung Cancer*. 2009;64:34-40.
14. Blanchon T, Bréchot JM, Grenier PA, Ferretti GR, Lemarié E, Milleron B, et al. Dépiscan Group. Baseline results of the Dépiscan study: a French randomized pilot trial of lung cancer screening comparing low dose CT scan (LDCT) and chest X-ray (CXR). *Lung Cancer*. 2007;58:50-58.
15. Henschke CI, McCauley DI, Yankelevitz DF, Naidich DP, McGuinness G, Miettinen OS, et al. Early Lung Cancer Action Project: Overall Design and Findings From Baseline Screening. *Lancet*. 1999;354:99-105.
16. Sone S, Takashima S, Li F, Yang Z, Honda T, Maruyama Y, et al. Mass screening for lung cancer with mobile spiral computed tomography scanner. *Lancet*. 1998;351:1242-1245.
17. Ru Zhao Y, Xie X, de Koning HJ, Mali WP, Vliegenthart R, Oudkerk M. NELSON lung cancer screening study. *Cancer Imaging*. 2011;11:s79-84.
18. Henschke CI, Yankelevitz DF, McCauley DI, Sone S, Hanaoka T, Markowitz S, et al. Survival of Patients with Stage I Lung Cancer Detected on CT screening. *N Engl J Med*. 2006;355:1763-71.

19. Kovalchik SA, Tammemagi M, Berg CD, Caporaso NE, Riley TL, Korch M, et al. Targeting of Low-Dose CT Screening According to the Risk of Lung Cancer Death. *N Engl J Med*. 2013;369:245-54.
20. de Torres JP, Bastarrika G, Wisnivesky JP, Alcaide AB, Campo A, Seijo LM, et al. Assessing the Relationship between Lung Cancer Risk and Emphysema Detected on Low-dose Computed Tomography of the Chest. *Chest*. 2007;132:1932-8.
21. de-Torres JP, Casanova C, Marín JM, Zagaceta J, Alcaide AB, Seijo LM, et al. Exploring the impact of screening with low-dose CT on lung cancer mortality in mild to moderate COPD patients: A pilot study. *Respir Med*. 2013;107:702-7.
22. Wilson DO, Weissfeld JL, Balkan A, Schragin JG, Fuhrman CR, Fisher SN, et al. Association of radiographic emphysema and airflow obstruction with lung cancer. *Am J Respir Crit Care Med*. 2008;178:738–744.
23. Bach PB. Inconsistencies in findings from the Early Lung Cancer Action Project studies of lung cancer screening. *J Natl Cancer Inst*. 2011;103:1002-1006.
24. Ruano-Ravina A, Pérez Ríos M, Fernández-Villar A. Cribado de cáncer de pulmón con tomografía computarizada de baja dosis después del National Lung Screening Trial. El debate continúa abierto. *Arch Bronconeumol*. 2013;49:158–165.
25. Pajares MJ, Zudaire I, Lozano MD, Agorreta J, Bastarrika G, Torre W, et al. Molecular Profiling of Computed Tomography Screen-Detected Lung Nodules Shows Multiple Malignant Features. *Cancer Epidemiol Biomarkers Prev*. 2006;15:373-380.
26. Mansera RL, Dodd M, Byrnes G, Irving LB, Campbell DA. Incidental lung cancers identified at coronal autopsy: implications for overdiagnosis of lung cancer by screening. *Respiratory Medicine*. 2005;99:501–507.
27. Hendee WR, O'Connor MK. Radiation Risks of Medical Imaging: Separating Fact from Fantasy. *Radiology*. 2012;264:312-21.
28. American Association of Physicists in Medicine. AAPM Position Statement on Radiation Risks from Medical Imaging Procedures. College Park, MD: AAPM; 2011. Policy PP25-A.
29. Taylor KL, Sanderson Cox L, Zincke N, Mehta L, McGuire C, Gelmann E. Lung cancer screening as a teachable moment for smoking cessation. *Lung Cancer*. 2007;56:125-134.



30. van der Aalst CM, van Klaveren RJ, van den Bergh KAM, Willemsen MC, de Koning HJ. The impact of a lung cancer computed tomography screening result on smoking abstinence. *Eur Respir J*. 2011;37:1466–1473.
31. Villanti AC, Jiang Y, Abrams DB, Pyenson BS (2013) A Cost-Utility Analysis of Lung Cancer Screening and the Additional Benefits of Incorporating Smoking Cessation Interventions. *PLoS ONE* 8(8): e71379. doi:10.1371/journal.pone.0071379.
32. Black WC, Gareen IF, Soneji SS, Sicks JD, Keeler EB, Aberle DR, et al, for the National Lung Screening Trial Research Team. Cost-Effectiveness of CT Screening in the National Lung Screening Trial. *N Engl J Med*. 2014;371:1793-802.

## **2. PRESENTACIÓN CLÍNICA. ESTUDIOS DE IMAGEN Y ANALÍTICOS. RIESGO QUIRÚRGICO Y EVALUACIÓN FUNCIONAL**

### **2.a. DIAGNÓSTICO CLÍNICO. MARCADORES SÉRICOS**

#### **2.a.1. Diagnóstico clínico**

La sospecha clínica de un CP se basa la historia clínica y en la capacidad de reconocer signos y síntomas propios pero en ocasiones poco específicos de la enfermedad.

La edad, el consumo de tabaco (dosis acumulada), la historia familiar de CP y de la esfera orofaríngea y la exposición al asbesto incrementan el riesgo de CP. Los síntomas y signos de debut más frecuentes son: tos (8-75%), dolor torácico (20-49%), disnea (3-60%), hemoptisis o expectoración hemoptoica (6-35%), astenia (0-10%), anorexia y pérdida de peso (0-68%), acropaquia (0-20%) y fiebre (0-20%) (1,2). Aunque muchos de estos signos y síntomas son los mismos que los de la EPOC que con frecuencia coexiste estos pacientes, la aparición "*de novo*", persistencia o modificación si ya existían, de uno o varios de ellos, en personas de riesgo (varón, mayor de 50 años, antecedente de neoplasia, fumador o ex fumador), debe alertar acerca de la posibilidad de padecer un CP. En el estudio de Hamilton et al, la disnea y la hemoptisis fueron los dos factores clínicos asociados de forma independiente al CP (3). La tos, astenia, pérdida de peso y anorexia son los síntomas asociados a un mayor retraso en la derivación de estos pacientes al especialista (2). El 15% de los pacientes está asintomático en el momento del diagnóstico (2).

La extensión locoregional puede dar lugar a un síndrome de Pancoast, dolor o palpación de una tumoración en pared torácica, dolor en el hombro, disfonía por infiltración del nervio recurrente, parálisis frénica, derrame pleural, disfagia, un síndrome de la vena cava superior o un derrame pericárdico con signos de taponamiento. La extensión extratorácica puede producir dolor óseo, fracturas patológicas, adenopatías supraclaviculares, hepatomegalia o trastornos neurológicos focales o generales, entre ellos dolor de cabeza o un síndrome confusional. El 10% de los enfermos desarrolla manifestaciones locales o sistémicas llamadas síndromes paraneoplásicos. Los más frecuentes son: hipercalcemia, hiponatremia, hipocalcemia, anemia, trombocitosis y síndromes leucemoides, síndromes de secreción inadecuada de la hormona

antidiurética y de Cushing, osteoartropatía hipertrófica néumica, acropaquias, síndromes miasteniformes, polimiositis, dermatomiositis y tromboembolismo pulmonar.

Existen factores organizativos que pueden influir en la calidad y eficiencia del proceso diagnóstico de un CP. Ante la sospecha clínica, tanto el especialista de medicina primaria como el especialista del servicio de urgencias médicas que eventualmente puede ser quien realice la primera visita de un paciente afecto de un CP, deben activar los mecanismos de alerta y derivación del enfermo. Aunque la influencia en la supervivencia del tiempo transcurrido desde el primer síntoma hasta el diagnóstico y desde éste hasta el tratamiento quirúrgico no está demostrado (4,5) la mayoría de las guías de práctica clínica recomiendan la derivación inmediata del enfermo con una sospecha de CP al neumólogo y a las unidades de diagnóstico rápido, así como la consideración del caso en un comité multidisciplinar (1).

### *Recomendación*

- Ante la sospecha clínica de un CP, el paciente debe remitirse de forma rápida al especialista, ser incluido en un circuito de diagnóstico rápido, y valorado por un equipo multidisciplinar (Grado 2C).

### **2.a.2. Marcadores séricos**

El papel de los marcadores séricos en la detección precoz (cribado) y diagnóstico del CP no está probado y no existen en la actualidad recomendaciones claras respecto a su determinación y utilidad en la práctica clínica. Esto se debe sobre todo a su baja sensibilidad y a la falta de especificidad de órgano. Por otro lado, la evidencia científica que existe respecto a su valor pronóstico y utilidad para el seguimiento del CP (monitorización de la respuesta al tratamiento, detección preclínica de las recurrencias) ha permitido establecer algunas recomendaciones aunque con un nivel de evidencia bajo.

Los marcadores séricos mejor estudiados son el antígeno del carcinoma escamoso, (squamous cell carcinoma antigen o SCC), el antígeno carcinoembrionario (cancinoembryonic antigen o CEA), el antígeno del fragmento 19 de la citoqueratina (cytokeratin 19 fragment

antigen 21-1 o CYFRA21-1), el antígeno de cáncer 125 (cancer antigen 125) y la enolasa neuronal específica (neuron specific enolase o NSE).

El CYFRA21-1 es el marcador más específico de CP incluyendo el carcinoma escamoso. El SCC en cifras superiores a 2 mg/L se asocia a una probabilidad cercana al 95% de padecer un CP y a un 80% de probabilidad de que éste sea un carcinoma escamoso. Valores de CA125 superiores a 100 U/mL y de CEA superiores a 10 mg/L se asocian a una alta probabilidad de padecer un adenocarcinoma o un carcinoma de células grandes. El NSE en suero es un marcador altamente específico de carcinoma microcítico.

En la mayor parte de estudios publicados, CYFRA 21.1, CEA and CA 125 fueron factores pronósticos independientes de supervivencia global en el carcinoma de células no microcíticas en estadio I-IIIa (6-21) y la NSE del carcinoma microcítico pero no del no microcítico (22,23). Otros autores no han encontrado en cambio este valor pronóstico (24). Una revisión reciente del papel del CEA en el CP ha encontrado que este marcador tumoral se asocia a un peor pronóstico (mayor riesgo de recidiva y muerte) independientemente del tratamiento, particularmente para los adenocarcinomas, incluyendo estadios iniciales tratados quirúrgicamente (I-II). Sin embargo, en ninguno de los estudios incluidos en la revisión se demostró su valor diagnóstico (7). Algunos autores han puesto de manifiesto el elevado valor pronóstico de supervivencia global de un índice que combina el CEA y el CYFRA 21.1 (9,25). Otros autores en cambio no han encontrado valor pronóstico a este índice (24).

Patel et al. encontraron que la combinación del CEA, CYFRA 21.1 y SCC tenía una elevada sensibilidad para la detección preclínica de la recidiva tras el tratamiento quirúrgico del CP y por tanto debería ser utilizada en el seguimiento de estos pacientes (26).

Hasta qué punto la presencia de un marcador sérico elevado en determinados subgrupos de enfermos puede ser determinante para realizar un tratamiento adicional o modificar el estándar no está claro. Matsuoka et al. consideran a los pacientes afectados de un adenocarcinoma estadio patológico I y un nivel de CEA preoperatorio alto candidatos para un tratamiento adyuvante tras la cirugía (10).

En la etapa de estudio diagnóstico inicial de un tumor pulmonar, el *European Group on Tumor Markers* recomienda realizar las siguientes determinaciones: CYFRA 21-1 y CEA para los adenocarcinomas y carcinomas de células grandes, CYFRA 21-1 para el carcinoma escamoso y CYFRA 21-1 y NSE para el carcinoma microcítico (27) (tabla 1).

## Recomendación

- En la evaluación inicial del CP, los marcadores tumorales séricos, particularmente el CEA y CYFRA 21-1, pueden ser de ayuda en el diagnóstico y en la estimación del pronóstico (Grado 2C).

Tabla 1. Marcadores séricos recomendados por el *European Group on Tumor Markers* en la etapa de estudio diagnóstico inicial de un tumor pulmonar.

| Subtipo histológico de CP    | Marcador         |
|------------------------------|------------------|
| Adenocarcinoma               | CYFRA 21-1 y CEA |
| Carcinoma de células grandes |                  |
| Carcinoma escamoso           | CYFRA 21-1       |
| Carcinoma microcítico        | CYFRA 21-1 y NSE |

## Resumen de recomendaciones

| Recomendación                                                                                                                                                                                | Grado |
|----------------------------------------------------------------------------------------------------------------------------------------------------------------------------------------------|-------|
| Ante la sospecha clínica de un CP, el paciente debe remitirse de forma rápida al especialista, ser incluido en un circuito de diagnóstico rápido, y valorado por un equipo multidisciplinar. | 2C    |
| En la evaluación inicial del CP, los marcadores tumorales séricos, particularmente el CEA y CYFRA 21-1, pueden ser de ayuda en el diagnóstico y en la estimación del pronóstico.             | 2C    |

## Bibliografía

1. Ost DE, Jim Yeung S-Ch, Tanoue LT, Gould MK. Clinical and Organizational Factors in the Initial Evaluation of Patients With Lung Cancer. *Diagnosis and Management of Lung Cancer*, 3rd ed: American College of Chest Physicians Evidence-Based Clinical Practice Guidelines. *Chest*. 2013;143(Suppl):e121S–e141S.
2. Buccheri G, Ferrigno D. Lung cancer: clinical presentation and specialist referral time. *Eur Respir J*. 2004;24:898–904.

3. Hamilton W, Peters TJ, Round A, Sharp D. What are the clinical features of lung cancer before the diagnosis is made? A population based case control study. *Thorax*. 2005;60:1059–65.
4. Aragonese FG, Moreno N, Leon P, Fontan EG, Folque E, The Bronchogenic Carcinoma Cooperative Group of the Spanish Society of Pneumology. Influence of delays on survival in the surgical treatment of bronchogenic carcinoma and Thoracic Surgery (GCCB-S). *Lung Cancer*. 2002;36:59–63.
5. Cañizares MA, Rivo JE, Blanco M, Toscano A, García EM, Purriños MJ. Influencia de la demora quirúrgica en la supervivencia de los pacientes intervenidos por carcinoma broncogénico. *Arch Bronconeumol*. 2007;43:165-70.
6. Kulpa J, Wojcik E, Reinfuss M, Kołodziejwski L. Carcinoembryonic antigen, squamous cell carcinoma antigen, CYFRA 21-1, and neuron-specific enolase in squamous cell lung cancer patients. *Clin Chem*. 2002;48:1931-7.
7. Grunnet M, Sorensen JB. Carcinoembryonic antigen (CEA) as tumor marker in lung cancer. *Lung Cancer*. 2012;76:138-43.
8. Kato T, Ishikawa K, Aragaki M, Sato M, Okamoto K, Ishibashi T, et al. Optimal predictive value of preoperative serum carcinoembryonic antigen for surgical outcomes in stage I non-small cell lung cancer: Differences according to histology and smoking status. *J Surg Oncol*. 2013;107:619-24.
9. Tomita M, Shimizu T, Ayabe T, Yonei A, Onitsuka T. Prognostic significance of tumour marker index based on preoperative CEA and CYFRA 21-1 in non-small cell lung cancer. *Anticancer Res*. 2010;30:3099-102.
10. Matsuoka K, Sumitomo S, Nakashima N, Nakajima D, Misaki N. Prognostic value of carcinoembryonic antigen and CYFRA21-1 in patients with pathological stage I non-small cell lung cancer. *Eur J Cardiothorac Surg*. 2007;32:435-9.
11. Hanagiri T, Sugaya M, Takenaka M, Oka S, Baba T, Shigematsu Y, et al. Preoperative CYFRA 21-1 and CEA as prognostic factors in patients with stage I non-small cell lung cancer. *Lung Cancer*. 2011;74:112-7.
12. Sawabata N, Ohta M, Takeda S, Hirano H, Okumura Y, Asada H, et al. Serum carcinoembryonic antigen level in surgically resected clinical stage I patients with non-small cell lung cancer. *Ann Thorac Surg*. 2002;74:174-9.
13. Hotta K, Segawa Y, Takigawa N, Kishino D, Saeki H, Nakata M, et al. Evaluation of the relationship between serum carcinoembryonic antigen level and treatment outcome in

- surgically resected clinical-stage I patients with non-small-cell lung cancer. *Anticancer Res.* 2000;20:2177-80.
14. Okada M, Nishio W, Sakamoto T, Uchino K, Yuki T, Nakagawa A, et al. Prognostic significance of perioperative serum carcinoembryonic antigen in non-small cell lung cancer: analysis of 1,000 consecutive resections for clinical stage I disease. *Ann Thorac Surg.* 2004;78:216-21.
  15. Okada M, Nishio W, Sakamoto T, Uchino K, Yuki T, Nakagawa A, et al. Effect of histologic type and smoking status on interpretation of serum carcinoembryonic antigen value in non-small cell lung carcinoma. *Ann Thorac Surg.* 2004;78:1004-9.
  16. Sakao Y, Tomimitsu S, Takeda Y, Natsuaki M, Itoh T. Carcinoembryonic antigen as a predictive factor for postoperative tumor relapse in early-stage lung adenocarcinoma. *Eur J Cardiothorac Surg.* 2004;25:520-2.
  17. Tomita M, Matsuzaki Y, Edagawa M, Shimizu T, Hara M, Onitsuka T. Prognostic significance of preoperative serum carcinoembryonic antigen level in lung adenocarcinoma but not squamous cell carcinoma. *Ann Thorac Cardiovasc Surg.* 2004;10:76-80.
  18. Buccheri G, Ferrigno D. Identifying patients at risk of early postoperative recurrence of lung cancer: a new use of the old CEA test. *Ann Thorac Surg.* 2003;75:973-80.
  19. Mizuguchi S, Nishiyama N, Iwata T, Nishida T, Izumi N, Tsukioka T. Serum Sialyl Lewis x and cytokeratin 19 fragment as predictive factors for recurrence in patients with stage I non-small cell lung cancer. *Lung Cancer.* 2007;58:369-75.
  20. Muley T, Dienemann H, Ebert W. CYFRA 21-1 and CEA are independent prognostic factors in 153 operated stage I NSCLC patients. *Anticancer Res.* 2004;24:1953-6.
  21. Icard P, Regnard JF, Essomba A, Panebianco V, Magdeleinat P, Levasseur P. Preoperative carcinoembryonic antigen level as a prognostic indicator in resected primary lung cancer. *Ann Thorac Surg.* 1994;58:811-4.
  22. Zhao WX, Luo JF. Serum neuron-specific enolase levels were associated with the prognosis of small cell lung cancer: a meta-analysis. *Tumour Biol.* 2013;34:3245-8.
  23. Yan HJ, Tan Y, Gu W. Neuron specific enolase and prognosis of non-small cell lung cancer: a systematic review and meta-analysis. *J BUON.* 2014;19:153-6.
  24. Blankenburg F, Hatz R, Nagel D, Ankerst D, Reinmiedl J, Gruber C, et al. Preoperative CYFRA 21-1 and CEA as prognostic factors in patients with stage I non-small cell lung cancer: external validation of a prognostic score. *Tumour Biol.* 2008;29:272-7.
  25. Moro D, Villemain D, Vuillez JP, Delord CA, Brambilla C. CEA, CYFRA21-1 and SCC in non-small cell lung cancer. *Lung Cancer.* 1995;13:169-76.

26. Patel JL, Erickson JA, Grenache DG, Roberts WL. Value of CYFRA 21-1, carcinoembryonic antigen, and squamous cell carcinoma antigen as tumor markers in non-small cell lung cancer patients. *Journal of Clinical Oncology*, 2008 ASCO Annual Meeting Proceedings (Post-Meeting Edition). Vol 26, No 15S (May 20 Supplement), 2008:19042.
27. European Group on Tumor Markers. Lung cancer. Tumour markers. Serum tumour markers. [http://www.egtm.eu/professionals/lung\\_cancer](http://www.egtm.eu/professionals/lung_cancer)

## **2.b. TÉCNICAS DE IMAGEN. RADIOGRAFÍA. TC, PET, RMN, US**

Las pruebas de imagen juegan un papel esencial para establecer el diagnóstico y estadificación del CP de forma precisa (1). El ritmo actual del desarrollo tecnológico de estas pruebas es tan rápido que la evidencia de la efectividad de las técnicas más nuevas como la TC multidetector, la tomografía por emisión de positrones (PET) o la PET-TC es escasa.

### **2.b.1. Radiografía de tórax**

La radiografía de tórax sigue siendo la técnica de imagen más utilizada para descartar un posible CP y para estudiar el efecto de determinados tratamientos (2).

Una radiografía simple de tórax de alta calidad en proyección postero-anterior (no se requiere en la actualidad la proyección lateral de forma habitual) (1) es esencial para iniciar el estudio ante la sospecha clínica de un CP (1). Cabe destacar que el no diagnóstico de un CP es una de las causas más frecuentes de mala praxis en radiología, con su consecuente implicación legal (2).

La sensibilidad para diagnosticar lesiones broncopulmonares malignas con radiografía de tórax se halla entre el 36% y el 84%, dependiendo de la población a estudio y del tamaño tumoral (2). Para mejorar la sensibilidad de las radiografía de tórax en el diagnóstico de nódulos pulmonares se están desarrollando sistemas de detección asistidos por ordenador, si bien parece que su utilidad es mayor cuando sirven de apoyo a radiólogos con menor experiencia (2).



La presencia de signos radiológicos como el ensanchamiento hilar, derrame pleural o atelectasia con los signos y síntomas de sospecha descritos anteriormente han de ponernos sobre aviso ante la más que posible existencia de un CP, por lo que el paciente deberá ser remitido urgentemente a un equipo multidisciplinario que se dedique al estudio del CP (3).

Ante un nódulo pulmonar solitario ( $\leq 3$  cm) detectado de forma casual, podemos realizar un diagnóstico si existen ciertos patrones de calcificación. Los patrones de calcificación difusos, centrales, laminados o en “palomita de maíz” se consideran benignos y, si son claramente evidentes, no requieren una mayor evaluación. Sin embargo, en ocasiones hay patrones de calcificación, como el punteado o el excéntrico, que no excluyen malignidad, siendo en estos casos necesario complementar el estudio.

Independientemente de todo ello, cuando se identifica un nódulo de características indeterminadas por radiografía de tórax, se recomienda revisar los estudios radiológicos previos (4) y realizar una TC de tórax (preferiblemente con cortes finos incluyendo el nódulo) para determinar la naturaleza de dicho nódulo.

### *Recomendaciones*

- En todo paciente con un NP indeterminado en una radiografía de tórax y/o TC, se recomienda la revisión de todo su historial de pruebas de imagen (Grado 1C).
- En caso de un NP indeterminado diagnosticado por radiografía de tórax se recomienda la realización de una TC para ayudar en la caracterización de la lesión (Grado 1C).

### **2.b.2. Tomografía computarizada**

Los progresivos avances en la tecnología de la TC han llevado a una disminución en el tiempo de adquisición de imágenes y artefactos secundarios al movimiento y a una mejora en la resolución espacial y delimitación de las diferentes estructuras anatómicas. Estas circunstancias, junto con la amplia disponibilidad de esta técnica, han hecho de la TC la prueba de referencia en el diagnóstico y estadificación del CP, siendo de obligada realización en todo paciente con lesiones sospechosas de malignidad en la radiografía de tórax (4,5).

A pesar del importante papel de la TC en la valoración de una posible afectación ganglionar mediastínica e infiltración de estructuras adyacentes al pulmón (como grandes vasos, columna vertebral y pared torácica), su principal función reside en la evaluación más precisa de todo nódulo o masa pulmonar sospechoso de malignidad.

Tradicionalmente, un nódulo pulmonar (NP) solitario ha sido definido como una opacidad menor de 3 cm, más o menos redondeada y delimitada en su totalidad por parénquima pulmonar aireado. En los TC actuales, los NPs detectados son cada vez más pequeños y, con mayor frecuencia, múltiples. Es por ello que en alguna de las últimas guías clínicas (ACCP 2013), la presencia de pequeños nódulos en el contexto de un NP dominante sigue incluyéndose entre los algoritmos de manejo del NP solitario (4,6).

Los NPs con calcificaciones de patrón benigno o tamaño inferior a 5 mm tienen una baja probabilidad de ser malignos. Sin embargo, muchos NPs no cumplen estos criterios motivo por el que los algoritmos de actuación clínica basados en la mayor evidencia científica disponible son fundamentales en la labor del clínico. Por otro lado, aunque la frecuencia con la que se detectan NPs de origen indeterminado en la TC convencional no puede ser extrapolada de aquélla hallada en las TC de baja radiación de programas de cribado, es un hecho conocido la habitual detección de NPs en pacientes sometidos a una TC de tórax por otras indicaciones. El concepto de NP indeterminado hace referencia a aquellos nódulos sin patrón benigno de calcificación u otros rasgos sugestivos de etiología benigna como la densidad grasa intranodular (signo patognomónico de hamartoma).

Cuando se detecta un NP solitario en un programa de cribado existen parámetros clínicos y radiológicos relacionados con una mayor probabilidad de malignidad. Entre los tomográficos, los más importantes están relacionados con el tamaño, forma, densidad y velocidad de crecimiento. Atendiendo a estos y otros rasgos radiológicos, la sensibilidad, especificidad y precisión diagnóstica para malignidad atribuidas a la TC helicoidal han sido del 89%, 61% y 83%, respectivamente (7).

El tamaño de un NP se ha correlacionado estrechamente con la probabilidad de malignidad en diferentes estudios (8). Una revisión de la literatura del cribado de CP con TC de baja radiación demostró la siguiente proporción de nódulos malignos según su tamaño: < 1% (< 5 mm), 6-28% (5-10 mm), 33-64% (11-20 mm) y 64-82% (> 20 mm) (9). Así pues, las lesiones pulmonares focales de más de 3 cm, conocidas como masas pulmonares, deberán de ser consideradas malignas mientras no se demuestre lo contrario.

A pesar de ser uno de los pilares en la valoración de todo NP indeterminado, la tasa de crecimiento de las lesiones malignas es ampliamente variable, al igual que sucede con la evolución de lesiones benignas. Mientras que lesiones inflamatorias agudas modifican su tamaño y morfología en el transcurso de pocos días, aquellas de carácter subagudo o crónico pueden presentar tiempos de duplicación tumoral solapados al que presentan muchas de las lesiones malignas (10). Sin embargo, resulta de capital importancia conocer y revisar el histórico de pruebas de imagen de todo paciente sospechoso de padecer un CP (4).

Con respecto a la densidad de un NP en la TC, se han descrito diferentes patrones de calcificación típicos de lesiones benignas: en palomita de maíz, central, laminado. La presencia de patrones excéntricos o punteados se ha relacionado con un origen maligno. Una clasificación de especial importancia por sus implicaciones en diferentes algoritmos de decisión de recientes Guías de Práctica Clínica (*National Comprehensive Cancer Network-NCCN 2014, American Thoracic Society-ATS 2012*) (figura 1), es la que categoriza a los nódulos pulmonares en: sólidos, no sólidos (*pure GGO = ground glass opacity*) y parcialmente sólidos (11). De particular interés son las lesiones no sólidas que evolucionan hacia un patrón parcialmente sólido, hecho que puede indicar el desarrollo de un componente maligno invasivo.

Los signos radiológicos de la TC relacionados más frecuentemente con el origen maligno de un NP son: márgenes espiculados (HR 5,5), retracción pleural (HR 1,9) y signo de convergencia vascular (HR 1,7) (12). Otros signos descritos son la presencia de un bronquio dilatado en dirección a la lesión y la pseudocavitación (13). La cavitación real, especialmente cuando se asocia a engrosamiento e irregularidad de sus paredes, es altamente sugestiva de enfermedad maligna.

La multiplicidad de los nódulos es de difícil interpretación. Aunque es ampliamente aceptado que abundantes nódulos de entre 5 y 10 mm son por lo general benignos, es habitual que tumores malignos de mayor tamaño detectados en forma de masas, presenten asociadas lesiones satélites subcentimétricas que tanto pueden ser malignas como benignas. Por otra parte, la presencia de nódulos múltiples, mayores de 1 cm con frecuencia es signo de afectación metastásica de un tumor primario extratorácico, conocido o no.

Figura 1. Algoritmo de seguimiento propuesto para los nódulos pulmonares a partir de la Guía de la NCCN (2014).

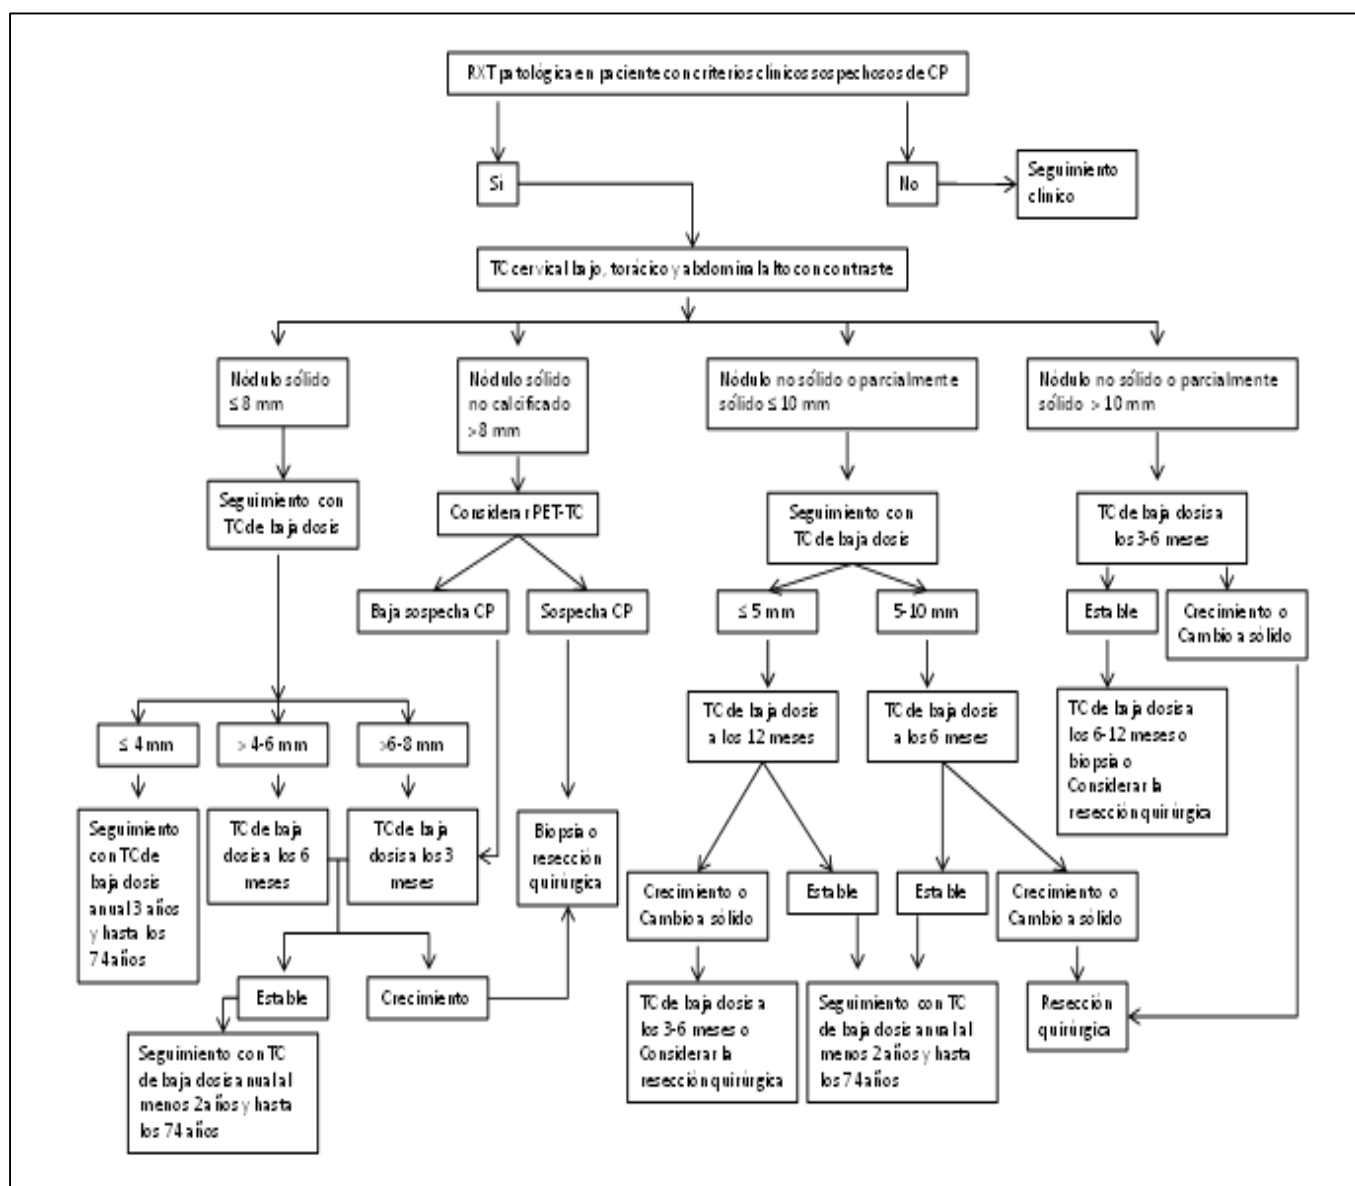

### Recomendación

- En caso de un NP sólido que ha permanecido estable durante al menos dos años, se recomienda no prolongar por más tiempo el seguimiento (Grado 2C).

### 2.b.3. 18-FDG PET-TC

El uso combinado de la TC con la PET utilizando la 18-fluorodesoxiglucosa (18-FDG) como marcador y el *standard uptake value* (SUV) como unidad de valoración, representa una importante herramienta en el diagnóstico y planificación del tratamiento en el CP así como una aproximación a la caracterización del NP (5). La PET modifica la indicación terapéutica hasta en un 24,4% de las ocasiones, evita toracotomías no curativas en el 5,2% y modifica el abordaje terapéutico en un 40% de candidatos a quimio-radioterapia radical. La obtención no sincrónica de las imágenes de TC y PET dificultaba en algunos casos la fusión de las mismas consecuencias de los movimientos respiratorios, sobre todo en las cúpulas diafragmáticas, problema que se ha resuelto en los equipos más nuevos utilizando el “gating” (14,15).

En el NP solitario mayor de 7 mm, la PET-TC tiene una sensibilidad del 97%, una especificidad del 85%, un valor predictivo positivo (VPP) del 88,4%, un valor predictivo negativo (VPN) del 94,8% y una exactitud diagnóstica del 93% con una diferencia estadísticamente significativa frente a otras pruebas utilizadas por separado usando un SUV de corte de 2,5; no obstante, se recomienda una estimación visual comparándolo con los vasos del mediastino (15,16).

En la estadificación del descriptor “T” presenta una exactitud diagnóstica del 70-97%. Mejora la información morfológica al diferenciar el tumor de la lesión inflamatoria o atelectasia subyacente y valorar mejor la infiltración mediastínica, sobre todo si se usa contraste yodado. Todo ello es de ayuda si hay que realizar una PAAF o planificar un volumen para RT. Una segunda exploración entre 150 a 500 minutos tras la primera puede diferenciar entre procesos inflamatorios (disminuye el SUV) y tumorales (mantienen, incluso aumenta, el SUV). Desgraciadamente, procesos como la tuberculosis, las micosis y la sarcoidosis se comportan como los tumores. Hay que comentar la posibilidad de falsos negativos en el caso de nódulos menores de 5 mm, el carcinoma bronquioalveolar, algunos subtipos de adenocarcinoma (mucinoso) y los tumores carcinoides (15,16).

En el derrame pleural tiene una sensibilidad del 100%, especificidad del 71%, VPP del 63% y VPN del 100%, lo que evita estudios más agresivos cuando no existe captación pleural, si bien su bajo VPP obliga a los mismos ante cualquier positividad (15).

En la estadificación “N” es donde este estudio tiene mayor trascendencia, con una sensibilidad del 79-85% y una especificidad del 89-92%. Según aumenta el tamaño del ganglio, aumenta la sensibilidad y disminuye la especificidad, la cual aumenta cuando disminuye el tamaño de éste. En los ganglios mayores de 1,5 cm la sensibilidad se acerca al 100% y la

especificidad al 78%. En los ganglios menores de 1 cm la sensibilidad llega al 82% y la especificidad al 93%. El VPN es, en general, del 90-95%, el VPP es menor del 70%, con una exactitud diagnóstica del 78-93%. El 5% de falsos negativos se deben a micrometástasis que sabemos que no empeoran el pronóstico tras la cirugía. Es por ello que todos los ganglios mayores de 1,5 cm sin captación y los que captan de cualquier tamaño deben ser biopsiados (17,18).

En la estadificación “M” tiene una exactitud diagnóstica del 82-92% aunque en este caso sin diferencia estadísticamente significativa clara con la TC o PET por separado. Es capaz de detectar hasta un 7,7% de metástasis malignas ocultas evitando así tratamientos quirúrgicos no curativos. A nivel de las glándulas adrenales, el PET-TC tiene una sensibilidad del 92% con un SUV >3.1, del 100% si se compara con la captación hepática y una especificidad del 98%. En las metástasis óseas la sensibilidad es similar a la gammagrafía con Tc<sup>99</sup> pero con especificidad, VPP y VPN superior a la misma. A nivel cerebral, el uso de la 18-FDG no es útil para detectar metástasis (15, 19, 20).

También tiene su utilidad en el seguimiento tras el tratamiento con cirugía y radioterapia. La realización de la prueba a los 2 meses de dichos procedimientos permite diferenciar la necrosis e inflamación postquirúrgica de la celularidad maligna viable con una sensibilidad entre el 72-96% y una especificidad del 82-92%. En el caso de tratamiento con QT, a las tres semanas ya puede predecir la respuesta al tratamiento.

### *Recomendaciones*

- En pacientes con ganglios aumentados de tamaño, sin metástasis a distancia con o sin captación en la 18FDG-PET-TC, se recomienda estadificación clínica invasiva (Grado 1C).
- En pacientes con ganglios de tamaño normal, sin metástasis a distancia con captación en la PET-TC de los mismos, se recomienda estadificación invasiva (Grado 1C).
- En pacientes con estadio clínico IA con tumor periférico con PET-TC sin ganglios de tamaño aumentado ni captación ganglionar mediastínica, no es necesaria la estadificación clínica invasiva (Grado 2B).

#### **2.b.4. Resonancia magnética**

Se han publicado múltiples estudios que comparan la resonancia magnética (RM) con la TC para la estadificación del CP. En general, la RM no ha mostrado suficientes ventajas como para sustituir a la TC con ese objetivo (21). Sin embargo, la RM ofrece ventajas para el diagnóstico y estadificación del CP en situaciones y pacientes seleccionados. La imagen de RM tiene una excelente resolución de contraste de los tejidos blandos, representa los vasos hiliares y mediastínicos sin necesidad de administrar medio de contraste, adquiere imágenes multiplanares directas que proporcionan gran detalle anatómico de zonas complejas y no utiliza radiación ionizante.

Las imágenes de RM también pueden ser de utilidad para diferenciar entre tejido tumoral y neumonitis distal, para identificar la afectación pericárdica o miocárdica de tumores adyacentes al corazón, de la vena cava superior o de la aorta, así como la infiltración del mediastino, la región subcarinal y la ventana aorto-pulmonar.

La RM es una exploración óptima para estudiar la extensión local del CP del sulcus superior (22), dado que los planos coronal y sagital directos muestran la anatomía de la cúpula de la pared torácica, del plexo braquial, los vasos subclavios, los forámenes vertebrales o cualquier invasión de la médula ósea. Desde la introducción de la TC multidetector, capaz de generar reconstrucciones multiplanares de calidad, se ha reducido la necesidad de la RM con esta finalidad.

Aunque la TC sigue siendo la técnica de elección para estadificación ganglionar, hilar y mediastínica, la RM puede ser útil para distinguir los ganglios linfáticos de los vasos sanguíneos sin utilizar medio de contraste intravenoso, motivo por el que puede ser una alternativa cuando está contraindicada su administración. Sin embargo, tiene el inconveniente de que el movimiento respiratorio deteriora la resolución espacial, con borrosidad de las imágenes, de modo que varios ganglios pequeños próximos pueden aparecer como un conglomerado adenopático. Además, no identifica las calcificaciones de adenopatías benignas, fácilmente reconocidas por la TC.

En la actualidad se acepta el uso de la RM para excluir la existencia de metástasis cerebrales en pacientes con un adenocarcinoma potencialmente curable que presentan clínica neurológica y una TC no concluyente (23).

Recientemente se han realizado estudios que comparan la precisión en el diagnóstico del nódulo pulmonar de las exploraciones de PET, TC dinámico, RM dinámica y SPECT-SCAN. Los resultados muestran una sensibilidad y especificidad similares en todas estas exploraciones (4). También se demuestra que la RM con medio de contraste paramagnético puede tener un papel relevante en el estudio de los nódulos pulmonares (21). Por otro lado, el uso reciente de imágenes de fusión de PET y RM resulta prometedor, si bien todavía es pronto para saber cuál será su papel en la práctica clínica (24).

### **2.b.5. Estudios ultrasonográficos**

El papel de la ecografía o ultrasonografía (US) en el diagnóstico del CP es muy limitado, si bien la ausencia de radiaciones ionizantes y la posibilidad de su exploración a la cabecera del paciente pueden ser de utilidad en enfermos especialmente sensibles a la radiación o en los de difícil movilización (25).

Por las propiedades físicas de los ultrasonidos, su utilidad en las enfermedades torácicas siempre ha sido secundaria, limitándose su uso principalmente a la valoración de la enfermedad pleural. En manos expertas son capaces de detectar la presencia de derrames pleurales de hasta 5 ml, resultando ser más precisos para esta finalidad que la radiografía convencional (26). También permiten detectar masas pleurales secundarias, visualizando lesiones pleurales parietales y viscerales de hasta 5 mm, además de diferenciar la atelectasia pasiva por derrame pleural de la atelectasia obstructiva, ocasionada por un tumor central en un 50% de las ocasiones (26).

En el pulmón sólo podrán valorarse mediante US aquellas neoplasias periféricas que presenten contacto pleural (27). La invasión de la pleura parietal y la pared torácica se manifiesta como una pérdida del deslizamiento pulmonar normal durante la respiración, fácilmente identificable mediante el uso de los ultrasonidos. Estudios recientes han demostrado que esta técnica tiene mayor rentabilidad que la TC y la RM de 1,5 teslas para valorar la invasión de la pared torácica (27).

A pesar de que el papel de la US en el diagnóstico por imagen del CP es escaso o casi nulo, su papel en la radiología intervencionista del tórax es fundamental. Las neoplasias periféricas con contacto pleural son susceptibles de punción bajo guía ecográfica con una sensibilidad del 97% y una precisión del 98% (26). La posibilidad de visualizar en tiempo real



la punta de la aguja permite puncionar nódulos a partir de 1 cm, evitar una zona de necrosis intralesional y acceder a localizaciones complejas, limitadas para otras técnicas de imagen.

## Resumen de recomendaciones

| Recomendación                                                                                                                                                                                  | Grado |
|------------------------------------------------------------------------------------------------------------------------------------------------------------------------------------------------|-------|
| En todo paciente con un NP indeterminado en una radiografía de tórax y/o TC, se recomienda la revisión de todo su historial de pruebas de imagen.                                              | 1C    |
| En caso de un NP indeterminado diagnosticado por radiografía de tórax se recomienda la realización de una TC para ayudar en la caracterización de la lesión.                                   | 1C    |
| En caso de un NP sólido que ha permanecido estable durante al menos dos años, se recomienda no prolongar por más tiempo el seguimiento.                                                        | 2C    |
| En pacientes con ganglios aumentados de tamaño, sin metástasis a distancia con o sin captación en la 18FDG-PET-TC, se recomienda estadificación clínica invasiva.                              | 1C    |
| En pacientes con ganglios de tamaño normal, sin metástasis a distancia con captación en la PET-TC de los mismos, se recomienda estadificación invasiva.                                        | 1C    |
| En pacientes con estadio clínico IA con tumor periférico con PET-TC sin ganglios de tamaño aumentado ni captación ganglionar mediastínica, no es necesaria la estadificación clínica invasiva. | 2B    |

## Bibliografía

1. Lim E, Baldwin D, Beckles M, Duffy J, Entwisle J, Faivre-Finn C, et al. Guidelines on the radical management of patients with lung cancer. *Thorax*. 2010;65(Suppl III):1-27.
2. De Hoop B, De Boo DW, Gietema HA, van Hoorn F, Mearadji B, Schijf L, et al. Computer-aided detection of lung cancer on chest radiographs: Effect on observer performance. *Radiology*. 2010;257:532-40.
3. The diagnosis and treatment of lung cancer. National Institute for Health and Clinical Excellence. Nice Clinical Guideline, 121. London: 2011.
4. Gould MK, Donington J, Lynch WR, Mazzone PJ, Midthun DE, Naidich DP, et al. Evaluation of individuals with pulmonary nodules: When is it lung cancer?. Diagnosis and management of lung cancer, 3er ed: American College of Chest Physicians Evidence-Based Clinical Practice Guidelines. *Chest*. 2013;143(5 Suppl):e93S-120S.

5. Álvarez-Martínez CJ, Bastarrika-Alemán G, Disdier-Vicente C, Fernández-Villar F, Hernández-Hernández JR, Maldonado Suárez A, et al. Normativa SEPAR sobre el manejo del nódulo pulmonar solitario. *Arch Bronconeumol*. 2014;50:285-93.
6. Colt HG, Murgu SD, Korst RJ, Slatore CG, Unger M, Quadrelli S. Follow-up and surveillance of the patient with lung cancer after curative-intent therapy: Diagnosis and management of lung cancer, 3rd ed: American College of Chest Physicians evidence-based clinical practice guidelines. *Chest*. 2013;143(5 Suppl):e437S-54S.
7. Seemann MD, Seemann O, Luboldt W, Bonél H, Sittek H, Dienemann H, et al. Differentiation of malignant from benign solitary pulmonary lesions using chest radiography, spiral CT and HRCT. *Lung Cancer*. 2000;29:105-24.
8. Henschke CI, Yankelevitz DF, Naidich DP, McCauley DI, McGuinness G, Libby DM, et al. CT screening for lung cancer: suspiciousness of nodules according to size on baseline scans. *Radiology*. 2004;231:164-8.
9. Wahidi MM, Govert JA, Goudar RK, Gould MK, McCrory DC. American College of Chest Physicians. Evidence for the treatment of patients with pulmonary nodules: when is it cancer? *Chest*. 2007;132:94S–107S.
10. Detterbeck FC, Gibson CJ. Turning gray: the natural history of lung cancer over time. *J Thorac Oncol*. 2008;3:781-92.
11. Jaklitsch M, Jacobson FL, Austin JH, Field JK, Jett JR, Keshavjee S, et al. The American Association for Thoracic Surgery guidelines for lung cancer screening using low-dose computed tomography scans for lung cancer survivors and other high-risk groups. *J Thorac Cardiovasc Surg*. 2012;144:33-8.
12. Harders SW, Madsen HH, Rasmussen TR, Hager H, Rasmussen F. High resolution spiral CT for determining the malignant potential of solitary pulmonary nodules: refining and testing the test. *Acta Radiol*. 2011;52:401-409.
13. Kishi K, Homma S, Kurosaki A, Motoi N, Kohno T, Nakata K, et al. Small lung tumors with the size of 1cm or less in diameter: clinical, radiological, and histopathological characteristics. *Lung Cancer*. 2004;44:43-51.
14. Taus A, Aguiló R, Curull V, Suárez-Piñera M, Rodríguez-Fuster A, Rodríguez de Dios N, et al. Impacto del 18-FDG PET-TAC en el abordaje terapéutico del cáncer de pulmón no microcítico. *Arch Bronconeuml*. 2014;50:99-104.
15. Pinilla I, Gómez León N. The usefulness of PET/CT in lung cancer. *Radiología*. 2009;51:248-60.

16. Opoka L, Kunikowska J, Podgajny Z, Szolkowska M, Błasińska-Przerwa K, Burakowska B, et al. Accuracy of FDG PET/CT in the evaluation of solitary pulmonary lesions –own experience. *Pneumol Alergol Pol.* 2014;82:198-205.
17. Silvestri GA, Gonzalez AV, Jantz MA, Margolis ML, Gould MK, Tanoue LT, et al. Methods for Staging Non-small Cell Lung Cancer: Diagnosis and management of lung cancer, 3rd ed: American College of Chest Physicians evidence-based clinical practice guidelines. *Chest.* 2013;143(5suppl):e211S-e250S.
18. De Leyn P, Doooms C, Kuzdzal J, Lardinois D, Passlick B, Rami-Porta R, et al. Revised ESTS guidelines for preoperative mediastinal lymph node staging for non-small-cell lung cancer. *Eur J Cardiothorac Surg.* 2014;45:787-98.
19. Alonso Moralejo R, Sayas Catalán J, García Luján R, Coronado Poggio M, Monsó Molas E, López Encuentra A. Utilidad de la tomografía por emisión de positrones en la detección de metástasis ocultas extratorácicas en el carcinoma broncogénico no células pequeña. *Arch Bronconeumol.* 2010;46:238-43.
20. Na F, Wang J, Li C, Deng L, Xue J, Lu Y. Primary tumor standardized uptake value measured on F18-fluorodeoxyglucose positron emission tomography is of prediction value for survival and local control in non-small-cell lung cancer receiving radiotherapy: Meta-Analysis. *J Thorac Oncol.* 2014;9:834-42.
21. Biederer J, Hintze C, Fabel M. MRI of pulmonary nodules: technique and diagnostic value. *Cancer Imaging.* 2008;8:125-130.
22. Manenti G, Raguso M, D'Onofrio S, Altobelli S, Scarano AL, Vasili E, et al. Pancoast tumor: the role of magnetic resonance imaging. *Case Rep Radiol.* 2013;2013:479120.
23. Paul NS, Ley S, Metser U. Optimal imaging protocols for lung cancer staging: CT, PET, MR imaging, and the role of imaging. *Radiol Clin North Am.* 2012;50:935-49.
24. Partovi S, Kohan A, Rubbert C, Vercher-Conejero JL, Gaeta C, Yuh R, et al. Clinical oncologic applications of PET/MRI: a new horizon. *Am J Nucl Med Mol Imaging.* 2014;4:202-12.
25. Koh DM, Burke S, Davies N, Padley SP. Transthoracic US of the chest: clinical uses and applications. *Radiographics.* 2002;22:e1.
26. Vollmer I, Gayete A. Ecografía torácica. *Arch Bronconeumol.* 2010;46:27-34.
27. Gallego Gómez MP, García Benedito P, Pereira Boo D, Sánchez Pérez M. Chest ultrasonography in pleuropulmonary disease. *Radiología.* 2014;56:52-60.

## **2.c. EVALUACIÓN PREOPERATORIA DEL RIESGO QUIRÚRGICO**

Actualmente, mientras se investiga la efectividad de otras alternativas de tratamiento local y sistémico, seguimos considerando la cirugía de resección pulmonar como el mejor tratamiento para los pacientes con CP en estadios localizados o localmente avanzado tras haber recibido un tratamiento de inducción efectivo (1). Sin embargo, la cirugía es un tratamiento que ofrece beneficios a costa de exponer al paciente a algún riesgo de complicaciones inmediatas, y en un pequeño porcentaje de casos, incluso mortalidad; además, pueden existir secuelas a largo plazo. Por estos motivos, la selección estricta de pacientes y la discusión con el enfermo de las diferentes alternativas y resultados de nuestra práctica es imperativa.

Aunque las recomendaciones incluidas a continuación se dirigen a la evaluación de pacientes con un CP, pueden hacerse extensivas para la evaluación preoperatoria de pacientes con cualquier otra patología por la que se indique una resección pulmonar.

### **3.c.1. La evaluación funcional estándar**

Siguiendo las guías publicadas (2-4) el primer escalón en la evaluación preoperatoria es la cuantificación del riesgo cardiovascular. Una vez evaluado, analizaremos la función pulmonar del paciente y a continuación, si es preciso, su capacidad de esfuerzo aeróbico. Los datos objetivos obtenidos nos permitirán conocer de forma bastante precisa el riesgo quirúrgico del paciente y localizar posibles áreas de mejora para disminuirlo o, en su defecto, derivar al paciente a recibir tratamiento no quirúrgico (figura 1).

Figura 1. Algoritmo de decisión para la clasificación del riesgo quirúrgico.

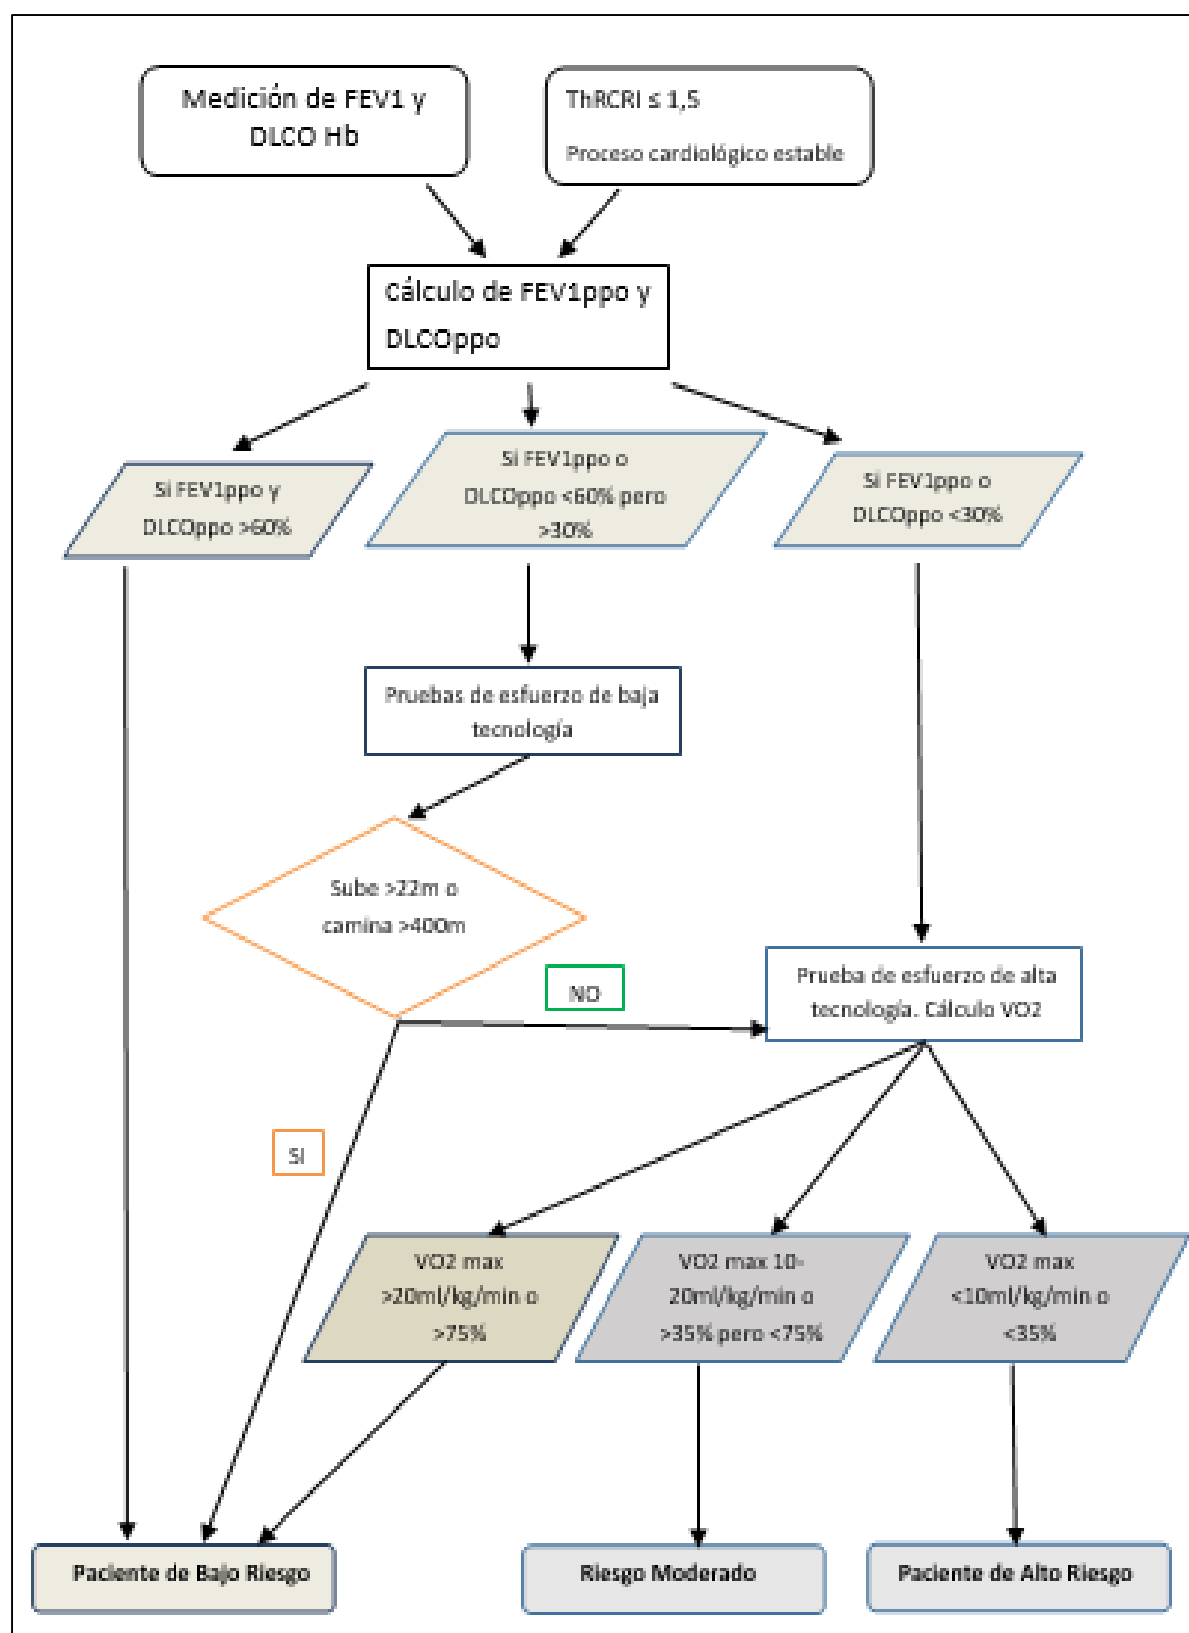

### 3.c.1.a. Evaluación cardiológica

#### 3.c.1.a.1. *Evaluación cardiológica en un paciente sin enfermedad cardiaca activa.*

Para realizar con éxito una resección pulmonar se requiere una situación cardiológica estable. Se estima que el riesgo de sufrir un infarto agudo de miocardio (IAM) tras una resección pulmonar está entre el 1 y el 5% según la *American College of Cardiology* y la *American Heart Association* (ACC/AHA) (5).

La evaluación cardiológica debe comenzar por la historia clínica centrada en reconocer síntomas y factores de riesgo cardiovasculares, la exploración general y un electrocardiograma en condiciones basales (2-4). Con los datos obtenidos calcularemos el índice de riesgo cardiológico específico para pacientes sometidos a resección pulmonar (6) que es una modificación específica para cirugía torácica del índice de riesgo cardiológico utilizado hasta entonces (7). Este nuevo índice, conocido como *Thoracic Revised Cardiac Risk Index* (ThRCRI) (6), clasifica a los pacientes en 4 categorías según el valor preoperatorio de la creatinina, la presencia o no de enfermedad cerebrovascular previa, de cardiopatía isquémica y la necesidad de neumonectomía. Se han realizado al menos dos revisiones de la capacidad clasificatoria y predictiva de este índice (8,9). En ambos casos se comprobó que su aplicación permite clasificar a los pacientes en categorías de riesgo diferentes estadísticamente, lo que permite la identificación preoperatoria de aquellos pacientes que precisan un estudio preoperatorio cardiológico específico y que se pueden beneficiar de una monitorización postoperatoria más exhaustiva. De acuerdo con el riesgo asociado a cada categoría aquellos pacientes cuyo ThRCRI sea mayor a 1,5 deben ser remitidos a una consulta cardiológica (3,5). También deberán ser evaluados por un cardiólogo todos aquellos pacientes que estén en tratamiento activo por una enfermedad cardiológica aparentemente estable pero sin seguimiento regular y aquellos en los que se sospeche un proceso de nueva aparición o que no puedan subir 2 pisos de escaleras por disnea no explicada.

Probablemente la prueba de ejercicio cardiorrespiratoria reglada puede ser igual de útil y válida que un test de estrés cardiológico al descubrir posibles situaciones de isquemia miocárdica oculta y poder cuantificar su magnitud a través de los parámetros de función del ventrículo izquierdo que se miden durante la prueba (3). Por eso, se empieza a recomendar que se realice para definir mejor la reserva coronaria y la función cardiológica de los pacientes.

### 3.c.1.a.2. Evaluación cardiológica en un paciente que presenta o ha presentado recientemente un proceso cardiológico activo

Existe un grupo de condiciones cuya presencia obliga a un tratamiento intensivo inmediato que supone, entre otras cosas, retrasar o a veces suspender el proceso quirúrgico previsto (tabla 1). Cualquiera de estas situaciones necesita la evaluación por un cardiólogo (5).

Tabla 1. Procesos cardiacos activos que precisan de una valoración por parte de cardiología. Cortesía de Fleisher et al. (5).

| Listado de procesos cardiacos activos                                                              |                                                                                                                                                                                                                                                                                                                     |
|----------------------------------------------------------------------------------------------------|---------------------------------------------------------------------------------------------------------------------------------------------------------------------------------------------------------------------------------------------------------------------------------------------------------------------|
| Condición patológica                                                                               | Ejemplo                                                                                                                                                                                                                                                                                                             |
| Síndromes coronarios inestables                                                                    | Angina severa o inestable<br>IAM reciente*                                                                                                                                                                                                                                                                          |
| Insuficiencia cardiaca descompensada en estado funcional IV, que ha empeorado o de nueva aparición |                                                                                                                                                                                                                                                                                                                     |
| Arritmias significativas                                                                           | Bloqueo AV de alto grado<br>Bloqueo Mobitz II auriculoventricular<br>Bloqueos de 3er grado<br>Arritmias ventriculares sintomáticas<br>Arritmias supraventriculares con respuesta ventricular no controlada<br>Bradicardia sintomática<br>Taquicardia ventricular sintomática de reciente aparición o reconocimiento |
| Enfermedad valvular severa                                                                         | Estenosis aórtica severa sintomática, con área valvular menor de 1cm <sup>2</sup> o con gradiente de presión mayor de 40mmHg<br>Estenosis mitral sintomática                                                                                                                                                        |

\* IAM reciente. Se distingue el IAM agudo, aquel que tiene menos de 7 días de evolución del IAM reciente, aquel que lleva entre 7 y 30 días de evolución.

Existe evidencia de que se debe evitar la realización de una resección pulmonar en un paciente con IAM reciente dentro de los 30 días siguientes (4). Por otro lado, se ha comprobado, que hasta un año después de haber colocado un stent coronario, la probabilidad de sufrir algún evento cardiológico mayor tras una resección pulmonar sigue significativamente más elevado respecto a la población que no ha sufrido problemas cardiológicos previos (10).

### *Recomendaciones*

- Todo paciente con una situación cardiológica estable y un ThRCRI menor o igual a 1,5 puede ser intervenido sin necesitar una evaluación cardiológica específica (Grado 1C).
- Todo paciente con un proceso cardiológico activo debe ser evaluado por un cardiólogo y, dependiendo del diagnóstico y su tratamiento, es posible que el paciente necesite una discusión individualizada antes de decidir el mejor tratamiento de su tumor (Grado 1C).
- Se debe evitar la realización de una resección pulmonar en un paciente con IAM reciente dentro de los 30 días siguientes (Grado 1B)

#### **3.c.1.b. Evaluación funcional respiratoria**

Del estudio progresivo de los factores funcionales respiratorios sabemos que sobre los valores de FEV1 y DLCO Hb va a pivotar gran parte del riesgo de la resección pulmonar. En este momento, existen datos suficientes que apoyan la necesidad de evaluar tanto los valores volumétricos dinámicos de la espirometría forzada como la capacidad de difusión (2-4) en todos los pacientes. Según lo que conocemos hoy, el valor del FEV1 ha perdido una parte de su importancia en favor del valor de la determinación de DLCO ajustada por la hemoglobina real del paciente. Hay varias razones para ello: por un lado, está demostrado que el FEV1 más importante para determinar la ocurrencia de complicaciones respiratorias en el postoperatorio inmediato es el valor del FEV1 del primer día frente a cualquier valor estimado postoperatorio (11). Por otro, se ha publicado que el FEV1previsto postoperatorio (FEV1ppo) en pacientes que parten de un FEV1% >70% no se relaciona significativamente con la ocurrencia de complicaciones postoperatorias (12). Finalmente, también se ha demostrado la presencia de un efecto reducción de volumen en pacientes enfisematosos que es responsable de que el FEV1ppo infraestime el valor real del FEV1 postoperatorio en pacientes con EPOC tipo enfisema (13). Varios estudios han demostrado que estos pacientes pueden tener una mejoría de su FEV1 3 a 6 meses después de la cirugía (14,15). Pese a estos detalles, se sabe que un valor de FEV1 y su correspondiente FEV1ppo bajos se asocian con un incremento en las complicaciones respiratorias y la mortalidad postoperatorias (3).

La ausencia de una buena correlación entre los valores de la espirometría forzada y la capacidad de difusión (16) y su importancia en los pacientes que han recibido quimioterapia de



inducción, han hecho que en este momento se recomiende la medición de DLCO a todos los pacientes. Además se ha demostrado que los valores de DLCO<sub>ppo</sub> son buenos predictores de la ocurrencia de complicaciones cardiorrespiratorias y de mortalidad, incluso en pacientes con valores espirométricos normales (16) y que la DLCO tiene valor pronóstico a largo plazo (17).

El problema que se plantea a continuación es cuál es el valor mínimo del FEV1 y de la DLCO a partir del cual el riesgo de la resección no es aceptable. Según datos de varios trabajos, cuando el FEV1 es inferior al 30%, la incidencia de complicaciones puede alcanzar el 43% (18) y según un análisis realizado utilizando curvas ROC (19), el punto de corte más ajustado para predecir la ocurrencia de complicaciones es el 60%. Respecto a la capacidad de transferencia del CO, se demostró que los pacientes con DLCO<40% sometidos a resección tenían una mortalidad mucho más elevada a largo plazo por causas no tumorales (20). Sin embargo, los valores importantes en la predicción del riesgo son los estimados dependiendo de la cantidad de parénquima que se vaya a resecar y de la cantidad de parénquima atelectásico incluido en la resección. Por eso, el punto de corte se va a establecer al calcular los valores de FEV1 y DLCO previstos postoperatorios.

### 3.c.1.b.1. *¿Cómo calcular los valores de FEV1 y DLCO previstos postoperatorios?*

Pese a la importancia que se le atribuyen a estos valores, no existe unanimidad acerca de cómo deben ser calculados y existen novedades interesantes que pueden hacer que los resultados sean mucho más exactos respecto a lo que ahora podemos obtener.

De momento, se recomienda utilizar el método de cuantificar la perfusión pulmonar solamente cuando la resección a realizar sea un neumonectomía (3). Para el cálculo se utilizará la siguiente fórmula (válida para los valores de FEV1 y DLCO):

$FEV1_{ppo} = FEV1 \times (1 - \text{porcentaje de la perfusión correspondiente al pulmón que se va a resecar})$ .

Cuando el cálculo se refiere a una resección menor a un pulmón completo se recomienda utilizar la fórmula en la que se realiza el cálculo según el número de segmentos anatómicos a resecar, teniendo en cuenta la presencia o ausencia de obstrucción completa del bronquio principal, lobar o alguno de los segmentarios. La fórmula a utilizar sería (igualmente válida

para valores de FEV1 y DLCO):  $FEV1_{ppo} = FEV1 \times (1 - y/z)$ , donde  $y$  es el número de segmentos a resear y  $z$  es el número de segmentos funcionantes.

De los resultados de la mayoría de los estudios publicados se puede concluir que valores tanto de FEV1 como DLCO previstos postoperatorios por debajo del 40% se asocian a un alto riesgo de morbilidad postoperatoria y una supervivencia significativamente menor que la de pacientes con igual estadio tumoral (21). Sin embargo, hay series en las que estos pacientes tienen aceptables tasas de morbilidad y mortalidad a 30 días e incluso a largo plazo. Se trata de series de pacientes muy seleccionados con una buena capacidad de ejercicio (ver apartado siguiente) o en los que se han utilizado abordajes mínimamente invasivos.

### *Recomendaciones*

- En todo paciente con CP al que se evalúa para una resección pulmonar, se deben medir tanto el FEV1 como la DLCO (Grado 1B).
- A todo paciente evaluado para resección pulmonar se le calcularán los valores de FEV1 y DLCO ajustada a la hemoglobina del paciente previstos postoperatorios para la toma de decisiones (Grado 1C).
- Si el cálculo de FEV1 y DLCO previstos postoperatorios es  $>60\%$ , no son necesarios más estudios (Grado 1C).
- Si al realizar el cálculo de los valores previstos postoperatorios, el  $FEV1_{ppo}$  o la  $DLCO_{ppo}$  están por debajo del 60% pero ese valor calculado es superior al 30% se recomienda realizar una prueba de baja tecnología para evaluar la capacidad de ejercicio aeróbico del paciente (Grado 1C).
- Si al realizar el cálculo, cualquiera el  $FEV1_{ppo}$  o la  $DLCO_{ppo}$  fueran inferiores al 30%, el paciente debe ser remitido para la realización de una prueba de ejercicio cardiopulmonar reglada en laboratorio (Grado 1B).

### **3.c.1.c. Evaluación de la capacidad de ejercicio**

Dependiendo de la gravedad de la alteración pulmonar, las guías recomiendan realizar dos tipos diferentes de pruebas para evaluar la capacidad de ejercicio aeróbico.

### 3.c.1.c.1. *Pruebas de baja tecnología*

#### 3.c.1.c.1.a. *Prueba de subir escaleras limitada por síntomas*

Esta modalidad implica que el paciente ascienda 22 m. de escaleras (7 pisos). Si alcanza esta altura sin pararse, el paciente puede someterse a una resección pulmonar con una probabilidad baja de sufrir complicaciones cardiorrespiratorias (alrededor del 16%) y muy baja de fallecer (cercana al 1%) (22). Además, la altura alcanzada ha demostrado tener una alta correlación con los valores de consumo de oxígeno (VO<sub>2</sub>) y subir 22 m. de altura se relaciona con tener un consumo de al menos 15ml/kg/min. Aunque las guías recomiendan su realización, esta prueba no está exenta de problemas bien por falta de seguridad para el paciente bien porque la metodología de desarrollo y análisis de los datos no es estándar entre los estudios y se están evaluando posibles alternativas. De momento se admite que si el paciente es capaz de subir los 22 m. de altura, independientemente de cuál sea su función pulmonar puede ser remitido a cirugía con seguridad (tabla 3).

#### 3.c.1.c.1.b. *ShuttleWalking Test*

Pese a la existencia de resultados que difieren mucho entre sí, se admite que esta prueba puede servir para discriminar pacientes con una buena capacidad de ejercicio y evitar así la realización de una prueba cardiopulmonar reglada en el laboratorio. Si el paciente es capaz de recorrer más de 25 largos, o lo que es lo mismo, 400 m. de forma continuada se admite que debe tener un VO<sub>2</sub>  $\geq$  15ml/kg/min por lo que se puede indicar la cirugía.

### 3.c.1.c.2. *Prueba de ejercicio cardiopulmonar de alta tecnología (CPET)*

Se trata de una prueba sofisticada y segura para el paciente, en la que se registran y miden todos los parámetros cardiopulmonares más importantes implicados en el ejercicio. De todos los datos que se obtienen, el valor del consumo de oxígeno máximo alcanzado es el que estratifica mejor el riesgo quirúrgico del paciente (23) y por tanto es el valor con el que vamos a tomar las decisiones. En general, se admite que valores de consumo superiores a los 20ml/kg/min son seguros para realizar cualquier tipo de resección pulmonar mientras que aquellos pacientes con valores entre 10 y 15ml/kg/min o entre el 35 y 75% del consumo de oxígeno ajustado para el peso del enfermo, tienen un riesgo incrementado de sufrir complicaciones cardiopulmonares postoperatorias (tabla 3). Se ha calculado que con un VO<sub>2</sub> predicho postoperatorio superior al 75% del que le corresponde por peso, la probabilidad de

complicación postoperatoria es del 10%. En el polo opuesto, valores del VO<sub>2</sub> inferiores a 12ml/kg/min se han asociado con una mortalidad del 13%.

### *Recomendaciones*

- Si un paciente no alcanza los 22m en la prueba de subir escaleras o no llega a recorrer los 400m en el *shuttle walking test*, debe ser remitido para realizar una prueba de ejercicio cardiopulmonar reglado en laboratorio con medición directa del consumo de oxígeno (Grado 1C).
- Si el consumo medido de un paciente en la CPET es inferior a 10ml/kg/min o al 35% de lo que le corresponde acorde a su peso, se recomienda que el paciente no se someta a una resección anatómica, se utilice un abordaje mínimamente invasivo o sea derivado a un tratamiento no quirúrgico (Grado 1C).

### **3.c.2. Situaciones especiales**

#### *3.c.2.a. Ausencia de pruebas de función pulmonar válidas*

La continuidad que supone la presencia de un algoritmo de decisión, permite inferir que ante la falta de pruebas funcionales, es obligado hacer una prueba de ejercicio cardiopulmonar reglada para conocer el consumo de oxígeno y tomar decisiones según este resultado.

#### *3.c.2.b. Ausencia de pruebas de ejercicio válidas*

Si un paciente no puede realizar ninguna de las pruebas de ejercicios validadas por la presencia de comorbilidad incapacitante, se sabe que estos pacientes tienen un riesgo elevado de complicaciones y mortalidad postoperatorias (24). Se trata de pacientes en los que es necesaria una discusión individualizada y donde la opinión del paciente debe tener mucha importancia.

#### *3.c.2.c. Pacientes ancianos (mayores de 80 años)*

La prevalencia del CP aumenta con la edad. La decisión sobre el mejor tratamiento posible en pacientes mayores de 80 años debe tener en cuenta el estadio tumoral, la expectativa de vida según el sexo del paciente, su *performance status* y por supuesto, la comorbilidad.

Las evidencias de las series de pacientes publicadas indican que en estadio I se pueden conseguir supervivencias largas a costa de ofrecer una morbilidad más severa que la observada en pacientes más jóvenes y que puede afectar a más del 20% de los casos (25). La mortalidad descrita se encuentra entre el 0 y 9% (2). Para conseguir buenos resultados, es necesario hacer un estudio completo y estricto de la situación funcional y la capacidad de ejercicio de estos enfermos, sin descartar por la edad la posibilidad de la resección pulmonar.

#### 3.c.2.d. *Evaluación tras tratamiento de inducción*

Todo paciente sometido a un tratamiento de inducción con quimio o radio-quimioterapia deberá ser sometido al mismo algoritmo de decisión que aquellos pacientes no tratados con anterioridad. Además, se pueden hacer las siguientes consideraciones respecto del riesgo en estos pacientes: El descenso de la DLCO% inferior al 20% de su valor previo al tratamiento no modifica el riesgo quirúrgico respecto al estimado previamente (26). Aquellos pacientes con descenso de la DLCO/VA superior al 8% respecto al valor previo a la inducción (27) y aquellos enfermos con un DLCO ajustada por hemoglobina inferior al 45% tras la inducción (26,28) tienen un riesgo muy aumentado de sufrir complicaciones en el postoperatorio inmediato y de tener una mala calidad de vida posterior. Serían susceptibles de discusión individualizada y de recibir una información exhaustiva antes de proceder a la toma de decisiones y a la resección.

#### *Recomendaciones*

- En pacientes ancianos con tumores potencialmente curables mediante la resección pulmonar, se recomienda que se realice una evaluación completa independientemente de la edad (Grado 1C).
- A los pacientes tratados con quimioterapia de inducción se les repetirán las pruebas de función pulmonar, especialmente la DLCO, para una correcta evaluación del riesgo quirúrgico (Grado 2C).

## Resumen de recomendaciones

| Recomendación                                                                                                                                                                                                                                                                                 | Grado |
|-----------------------------------------------------------------------------------------------------------------------------------------------------------------------------------------------------------------------------------------------------------------------------------------------|-------|
| Todo paciente con una situación cardiológica estable y un ThRCRI menor o igual a 1,5 puede ser intervenido sin necesitar una evaluación cardiológica específica.                                                                                                                              | 1C    |
| Todo paciente con un proceso cardiológico activo debe ser evaluado por un cardiólogo y, dependiendo del diagnóstico y su tratamiento, es posible que el paciente necesite una discusión individualizada antes de decidir el mejor tratamiento de su tumor.                                    | 1C    |
| Se debe evitar la realización de una resección pulmonar en un paciente con IAM reciente dentro de los 30 días siguientes.                                                                                                                                                                     | 1B    |
| En todo paciente con CP al que se evalúa para una resección pulmonar, se deben medir tanto el FEV1 como la DLCO.                                                                                                                                                                              | 1B    |
| A todo paciente evaluado para resección pulmonar se le calcularán los valores de FEV1 y DLCO ajustada a la hemoglobina del paciente previstos postoperatorios para la toma de decisiones.                                                                                                     | 1C    |
| Si el cálculo de FEV1 y DLCO previstos postoperatorios es >60%, no son necesarios más estudios.                                                                                                                                                                                               | 1C    |
| Si al realizar el cálculo de los valores previstos postoperatorios, el FEV1ppo o la DLCOppo están por debajo del 60% pero ese valor calculado es superior al 30% se recomienda realizar una prueba de baja tecnología para evaluar la capacidad de ejercicio aeróbico del paciente.           | 1C    |
| Si al realizar el cálculo, cualquiera el FEV1ppo o la DLCOppo fueran inferiores al 30%, el paciente debe ser remitido para la realización de una prueba de ejercicio cardiopulmonar reglada en laboratorio.                                                                                   | 1B    |
| Si un paciente no alcanza los 22m en la prueba de subir escaleras o no llega a recorrer los 400m en el <i>shuttle walking test</i> , debe ser remitido para realizar una prueba de ejercicio cardiopulmonar reglado en laboratorio con medición directa del consumo de oxígeno.               | 1C    |
| Si el consumo medido de un paciente en la CPET es inferior a 10ml/kg/min o al 35% de lo que le corresponde acorde a su peso, se recomienda que el paciente no se someta a una resección anatómica, se utilice un abordaje mínimamente invasivo o sea derivado a un tratamiento no quirúrgico. | 1C    |
| En pacientes ancianos con tumores potencialmente curables mediante la resección pulmonar, se recomienda que se realice una evaluación completa independientemente de la edad.                                                                                                                 | 1C    |

|                                                                                                                                                                                      |    |
|--------------------------------------------------------------------------------------------------------------------------------------------------------------------------------------|----|
| A los pacientes tratados con quimioterapia de inducción se les repetirán las pruebas de función pulmonar, especialmente la DLCO, para una correcta evaluación del riesgo quirúrgico. | 2C |
|--------------------------------------------------------------------------------------------------------------------------------------------------------------------------------------|----|

## Bibliografía

1. Rami-Porta R, Crowley JJ, Goldstraw P. The revised TNM staging system for lung cancer. *Ann Thorac Cardiovasc Surg*. 2009;15:4-9.
2. Brunelli A, Charloux A, Bolliger CT, Rocco G, Sculier JP, Varela G, et al. ERS/ESTS clinical guidelines on fitness for radical therapy in lung cancer patients (surgery and chemo-radiotherapy). *Eur Respir J*. 2009;34:17-41.
3. Brunelli A, Kim AW, Berger KI, Addrizzo-Harris DJ. Physiologic evaluation of the patient with lung cancer being considered for resectional surgery: Diagnosis and management of lung cancer, 3rd ed: American College of Chest Physicians evidence-based clinical practice guidelines. *Chest*. 2013;143(5 Suppl):e166S-90S.
4. Lim E, Baldwin D, Beckles M, Duffy J, Entwisle J, Faivre-Finn C, et al. Guidelines on the radical management of patients with lung cancer. *Thorax*. 2010;65(Suppl III):1-27.
5. Fleisher LA, Beckman JA, Brown KA, Calkins H, Chaikof EL, Fleischmann KE, et al. ACC/AHA 2007 guidelines on perioperative cardiovascular evaluation and care for noncardiac surgery: a report of the American College of Cardiology/American Heart Association Task Force on Practice Guidelines (Writing Committee to Revise the 2002 Guidelines on Perioperative Cardiovascular Evaluation for Noncardiac Surgery) developed in collaboration with the American Society of Echocardiography, American Society of Nuclear Cardiology, Heart Rhythm Society, Society of Cardiovascular Anesthesiologists, Society for Cardiovascular Angiography and Interventions, Society for Vascular Medicine and Biology, and Society for Vascular Surgery. *J Am Coll Cardiol*. 2007;50:e159-241.
6. Brunelli A, Varela G, Salati M, Jimenez MF, Pompili C, Novoa N, et al. Recalibration of the revised cardiac risk index in lung resection candidates. *Ann Thorac Surg*. 2010;90:199-203.

7. Lee TH, Marcantonio ER, Mangione CM, Thomas EJ, Polanczyk CA, Cook EF, et al. Derivation and prospective validation of a simple index for prediction of cardiac risk of major noncardiac surgery. *Circulation*. 1999;100:1043-9.
8. Brunelli A, Cassivi SD, Fibla J, Halgren LA, Wigle DA, Allen MS, et al. External validation of the recalibrated thoracic revised cardiac risk index for predicting the risk of major cardiac complications after lung resection. *Ann Thorac Surg*. 2011;92:445-8.
9. Ferguson MK, Saha-Chaudhuri P, Mitchell JD, Varela G, Brunelli A. Prediction of major cardiovascular events after lung resection using a modified scoring system. *Ann Thorac Surg*. 2014;97:1135-40.
10. Fernandez FG, Crabtree TD, Liu J, Meyers BF. Incremental risk of prior coronary arterial stents for pulmonary resection. *Ann Thorac Surg*. 2013;95:1212-8.
11. Varela G, Brunelli A, Rocco G, Marasco R, Jimenez MF, Sciarra V, et al. Predicted versus observed FEV1 in the immediate postoperative period after pulmonary lobectomy. *Eur J Cardiothorac Surg*. 2006;30:644-8.
12. Brunelli A, Al Refai M, Monteverde M, Sabbatini A, Xiume F, Fianchini A. Predictors of early morbidity after major lung resection in patients with and without airflow limitation. *Ann Thorac Surg*. 2002;74:999-1003.
13. Varela G, Brunelli A, Rocco G, Jimenez MF, Salati M, Gatani T. Evidence of lower alteration of expiratory volume in patients with airflow limitation in the immediate period after lobectomy. *Ann Thorac Surg*. 2007;84:417-22.
14. Brunelli A, Xiume F, Refai M, Salati M, Marasco R, Sciarra V, et al. Evaluation of expiratory volume, diffusion capacity, and exercise tolerance following major lung resection: a prospective follow-up analysis. *Chest*. 2007;131:141-7.
15. Edwards JG, Duthie DJ, Waller DA. Lobar volume reduction surgery: a method of increasing the lung cancer resection rate in patients with emphysema. *Thorax*. 2001;56:791-5.
16. Ferguson MK, Vigneswaran WT. Diffusing capacity predicts morbidity after lung resection in patients without obstructive lung disease. *Ann Thorac Surg*. 2008;85:1158-64.
17. Ferguson MK, Dignam JJ, Siddique J, Vigneswaran WT, Celauro AD. Diffusing capacity predicts long-term survival after lung resection for cancer. *Eur J Cardiothorac Surg*. 2012;41:e81-6.



18. Berry MF, Villamizar-Ortiz NR, Tong BC, Burfeind WR Jr., Harpole DH, D'Amico TA, et al. Pulmonary function tests do not predict pulmonary complications after thoracoscopic lobectomy. *Ann Thorac Surg.* 2010;89:1044-51.
19. Licker MJ, Widikker I, Robert J, Frey JG, Spiliopoulos A, Ellenberger C, et al. Operative mortality and respiratory complications after lung resection for cancer: impact of chronic obstructive pulmonary disease and time trends. *Ann Thorac Surg.* 2006;81:1830-7.
20. Liptay MJ, Basu S, Hoaglin MC, Freedman N, Faber LP, Warren WH, et al. Diffusion lung capacity for carbon monoxide (DLCO) is an independent prognostic factor for long-term survival after curative lung resection for cancer. *J Surg Oncol.* 2009;100:703-7.
21. Martin-Ucar AE, Fareed KR, Nakas A, Vaughan P, Edwards JG, Waller DA. Is the initial feasibility of lobectomy for stage I non-small cell lung cancer in severe heterogeneous emphysema justified by long-term survival? *Thorax.* 2007;62:577-80.
22. Brunelli A, Refai M, Xiume F, Salati M, Sciarra V, Socci L, et al. Performance at symptom-limited stair-climbing test is associated with increased cardiopulmonary complications, mortality, and costs after major lung resection. *Ann Thorac Surg.* 2008;86:240-7.
23. Benzo R, Kelley GA, Recchi L, Hofman A, Sciarra F. Complications of lung resection and exercise capacity: a meta-analysis. *Respir Med.* 2007;101:1790-7.
24. Brunelli A, Sabbatini A, Xiume F, Borri A, Salati M, Marasco RD, et al. Inability to perform maximal stair climbing test before lung resection: a propensity score analysis on early outcome. *Eur J Cardiothorac Surg.* 2005;27:367-72.
25. Brock MV, Kim MP, Hooker CM, Alberg AJ, Jordan MM, Roig CM, et al. Pulmonary resection in octogenarians with stage I nonsmall cell lung cancer: a 22-year experience. *Ann Thorac Surg.* 2004;77:271-7.
26. Margaritora S, Cesario A, Cusumano G, Cafarotti S, Corbo GM, Ferri L, et al. Is pulmonary function damaged by neoadjuvant lung cancer therapy? A comprehensive serial time-trend analysis of pulmonary function after induction radiochemotherapy plus surgery. *J Thorac Cardiovasc Surg.* 2010;139:1457-63.
27. Cerfolio RJ, Talati A, Bryant AS. Changes in pulmonary function tests after neoadjuvant therapy predict postoperative complications. *Ann Thorac Surg.* 2009;88:930-5.

28. Takeda S, Funakoshi Y, Kadota Y, Koma M, Maeda H, Kawamura S, et al. Fall in diffusing capacity associated with induction therapy for lung cancer: a predictor of postoperative complication? *Ann Thorac Surg.* 2006;82:232-6.

### 3. ESTUDIOS DE CONFIRMACIÓN CITO-HISTOLÓGICA Y ESTADIFICACIÓN

#### 3.a. ESTADIOS

En la práctica habitual, cuando se diagnostica a un paciente de CP, además de evaluar la importancia de datos relacionados con el paciente como la edad, los síntomas, el *performance status*, la comorbilidad, la actitud frente a la enfermedad, etc., hay dos parámetros del tumor cuyo conocimiento es imprescindible: la estirpe histológica y el estadio TNM.

La clasificación por estadios es esencialmente una descripción de la extensión anatómica del tumor. Implica definiciones claras y precisas que permitan clasificar a cada tumor de forma común y consistente. El avance en las herramientas diagnósticas, cada vez más sensibles y precisas, ayuda a establecer con mayor exactitud y grado de certeza la extensión de la enfermedad en un paciente concreto, pero no modifica las definiciones de los diferentes descriptores T, N o M. Sin embargo, a medida que dichas técnicas permiten conocer nuevos detalles y se llega a conocer su posible valor pronóstico, la clasificación TNM se va haciendo más compleja. Por tanto, es muy conveniente revisarla periódicamente (1).

##### 3.a.1. Utilidad de la clasificación TNM

Su importancia práctica deriva de la posibilidad de obtener información pronóstica fiable y de la ayuda en la planificación del tratamiento y en la evaluación de los resultados del mismo. Además de estos objetivos de interés clínico directo, una buena clasificación facilita el intercambio de información entre diferentes centros, al proporcionar un método de transmitir la experiencia clínica sin ambigüedad. Por todo ello, ha de considerarse también como una herramienta básica en la investigación del cáncer.

La clasificación TNM tiene indudable valor pronóstico, y en los análisis de supervivencia global efectuados con los datos de la última edición, se calculó que podía explicar aproximadamente un 30% de la variabilidad de la misma (2) en un conjunto muy amplio de pacientes. Sin embargo, es evidente que las expectativas vitales de un paciente concreto dependen de una gran variedad de circunstancias, algunas conocidas (edad, *performance status*,

comorbilidad, tratamiento recibido, etc.) y otras, no. Como ha señalado Detterbeck, el pronóstico de un paciente, incluso si se tienen en cuenta una gran cantidad de variables, es algo inherentemente complejo que lleva aparejado un alto grado de incertidumbre (1).

Además del valor pronóstico, una clasificación TNM precisa es de importancia crítica para orientar la elección del mejor tratamiento posible. Sin embargo, el grado de extensión no dicta, sin más, el tratamiento a aplicar; éste depende también de otros rasgos del tumor (estirpe histológica, rasgos biológicos que influyen en la quimiosensibilidad o radiosensibilidad, etc.) y de circunstancias del paciente (edad, situación funcional cardiorrespiratoria, comorbilidad o actitud frente a la enfermedad) (1). Aunque esto es evidente, en la práctica existe un vínculo tan estrecho entre el estadio TNM y los protocolos o algoritmos terapéuticos, que los cambios en la clasificación pueden suscitar confusión. Así, en una reciente encuesta practicada a especialistas en el manejo del CP, en la que se preguntaba por la opción terapéutica a elegir ante los mismos pacientes clasificados según la anterior y la actual edición TNM, se observó que el 77% de los especialistas alteraría la pauta seleccionada en respuesta a un cambio en la designación del estadio (3). Sin embargo, esta actitud carece de fundamento, puesto que sólo los ensayos clínicos bien diseñados permiten decidir sobre el mejor tratamiento (4).

Aunque idealmente, una clasificación completa debería abarcar todos los atributos que definen la historia natural de la enfermedad y determinan la mejor opción terapéutica, en la práctica, para cualquier cáncer y para el CP en particular, son muchos los componentes que se deben considerar, además de la extensión anatómica. A este respecto, es conocida la importancia reciente de conocer la estirpe histológica cada vez con mayor detalle y no sólo según la simple división tradicional en dos grupos, microcítico o no microcítico (5). Por otro lado, los avances obtenidos en el conocimiento de las alteraciones genómicas y moleculares y la aparición de fármacos con mecanismo de acción muy selectivo frente a mutaciones que alteran la conducta biológica de las células neoplásicas suscitan la esperanza de clasificar a los tumores según sus propiedades biológicas, algo que podría tener relevancia terapéutica. Sin embargo, los conocimientos al respecto son todavía muy escasos y fragmentarios. Aunque se conocen ya diversas mutaciones con trascendencia clínica y terapéutica, no se sabe mucho todavía acerca de la conexión entre muchas alteraciones genéticas y la conducta biológica (tasa de crecimiento, propensión a metastatizar, etc.) ni sobre cómo van cambiando esas propiedades con el desarrollo temporal del tumor (1). Si se aspira, además, a que la clasificación sea completa, sería preciso integrar en la misma circunstancias dependientes del paciente cuyo valor pronóstico es bien conocido (edad, performance status, comorbilidad, estado funcional

cardiorrespiratorio, etc.). Por todo ello, parece muy complejo elaborar una clasificación multidimensional, que integre orgánicamente toda la información conocida.

### 3.a.2. Clasificación TNM de la IASLC (7ª edición)

La *International Association for the Study of Lung Cancer* (IASLC) organizó un Comité Internacional de Estadificación que recogió retrospectivamente los datos de 100.869 pacientes diagnosticados entre 1990 y 2000, sometidos a diversas modalidades terapéuticas, quirúrgicas o no, y seguidos al menos durante 5 años. Procedían de 45 fuentes pertenecientes a 20 países de varios continentes. Los hallazgos del estudio que pudieran constituir recomendaciones para cambiar algún componente T, N o M fueron validados internamente (por región geográfica y tipo de base de datos) y externamente con enfermos del registro *Surveillance, Epidemiology and End Results* (SEER) estadounidense (2,6,7).

El análisis principal que da base a la nueva clasificación se basó en los CPCNP. Pese a disponer de información sobre diversos aspectos del **componente T**, sólo se pudo analizar con detalle el tamaño tumoral, la existencia de nódulos acompañantes y la diseminación pleural. Se observó una relación directa muy estrecha entre el tamaño y la supervivencia global, lo que permitió establecer nuevos subgrupos T según dicho criterio (tabla 1). También se comprobó la significación pronóstica de la presencia y localización de nódulos adicionales. Si estos se localizan en el mismo lóbulo del tumor primario, ahora son clasificados como T3; si en el mismo pulmón, pero en distinto lóbulo, como T4, y si se hallan en el otro pulmón, como M1. La presencia de derrame pleural maligno o pericárdico, que implican una supervivencia muy pobre, se considera ahora como M1 (tabla 1).

**Componente N.** Se encontraron también diferencias significativas en la supervivencia a los 5 años en tres grandes grupos de enfermos: a) quienes tenían afectación de una sola zona N1 patológica (48%), b) de múltiples zonas N1 patológicas (35%) o una sola N2 patológica (34%) y c) múltiples zonas N2 patológicas (20%). Pero estos hallazgos no pudieron ser validados por áreas geográficas ni categorías T por lo que no se recomendaron cambios relativos a N para la nueva clasificación (8).

**Componente M.** Tras el análisis detallado de la supervivencia, se decidió subdividir el componente M en M1a (presencia de diseminación pleural, pericárdica o nódulo/s pulmonar/es contralateral/es) y M1b (metástasis a distancia) (4) (tabla1).

Tabla 1. Cáncer de pulmón. Clasificación TNM-estadios de la IASLC-2009. Descriptores TNM.

|                                           |                                                                                                                                                                                                                                                                                                                                                                                                                                                                             |
|-------------------------------------------|-----------------------------------------------------------------------------------------------------------------------------------------------------------------------------------------------------------------------------------------------------------------------------------------------------------------------------------------------------------------------------------------------------------------------------------------------------------------------------|
| <b>T (tumor primario)</b>                 |                                                                                                                                                                                                                                                                                                                                                                                                                                                                             |
| TX                                        | El tumor primario no puede ser evaluado, o tumor probado por la existencia de células tumorales malignas en esputo o lavados bronquiales pero no visualizado por métodos de imagen o broncoscopia.                                                                                                                                                                                                                                                                          |
| T0                                        | No evidencia de tumor primario.                                                                                                                                                                                                                                                                                                                                                                                                                                             |
| Tis                                       | Carcinoma in situ.                                                                                                                                                                                                                                                                                                                                                                                                                                                          |
| T1                                        | Tumor $\leq 3$ cm en su mayor diámetro, rodeado por pulmón o pleura visceral, sin evidencia broncoscópica de invasión más proximal del bronquio lobar (es decir: no hay invasión en el bronquio principal) <sup>a</sup>                                                                                                                                                                                                                                                     |
| T1a                                       | Tumor $\leq 2$ cm en su mayor diámetro.                                                                                                                                                                                                                                                                                                                                                                                                                                     |
| T1b                                       | Tumor $>2$ cm y $\leq 3$ cm en su mayor diámetro.                                                                                                                                                                                                                                                                                                                                                                                                                           |
| T2                                        | Tumor $>3$ cm y $\leq 7$ cm en su mayor diámetro o un tumor con cualquiera de las siguientes características (Los tumores T2 con estas características se clasificarán como T2a si su diámetro es $\leq 5$ cm): afecta al bronquio principal, distante 2 o más cm de la carina principal; invade la pleura visceral; asociado con atelectasia o neumonitis obstructiva que se extiende hasta la región hiliar pero no afecta al pulmón entero.                              |
| T2a                                       | Tumor $>3$ cm y $\leq 5$ cm en su mayor diámetro.                                                                                                                                                                                                                                                                                                                                                                                                                           |
| T2b                                       | Tumor $>5$ cm y $\leq 7$ cm en su mayor diámetro.                                                                                                                                                                                                                                                                                                                                                                                                                           |
| T3                                        | Tumor $>7$ cm o de cualquier tamaño que invada directamente cualquiera de las siguientes estructuras: pared torácica (incluyendo los tumores del sulcus superior), diafragma, nervio frénico, pleura mediastínica, pericardio parietal; o un tumor a menos de 2 cm de la carina principal pero sin invadirla; o asociado a atelectasia o neumonitis obstructiva del pulmón entero o existencia de nódulo(s) tumoral(es) separado(s) del tumor primario, en su mismo lóbulo. |
| T4                                        | Tumor de cualquier tamaño que invada cualquiera de las siguientes estructuras: mediastino, corazón, grandes vasos, tráquea, nervio recurrente laríngeo, esófago, cuerpo vertebral, carina; o existencia de nódulo(s) tumoral(es) separado(s) del tumor primario, en un lóbulo diferente del pulmón homolateral.                                                                                                                                                             |
| <b>N (ganglios linfáticos regionales)</b> |                                                                                                                                                                                                                                                                                                                                                                                                                                                                             |
| NX                                        | Los ganglios linfáticos regionales no pueden ser evaluados.                                                                                                                                                                                                                                                                                                                                                                                                                 |
| N0                                        | No existen metástasis ganglionares linfáticas regionales.                                                                                                                                                                                                                                                                                                                                                                                                                   |
| N1                                        | Metástasis en ganglios linfáticos peribronquiales homolaterales y/o hilares homolaterales e intrapulmonares, incluyendo la afectación por extensión directa.                                                                                                                                                                                                                                                                                                                |
| N2                                        | Metástasis en ganglios linfáticos mediastínicos homolaterales y/o subcarinales.                                                                                                                                                                                                                                                                                                                                                                                             |
| N3                                        | Metástasis ganglionares linfáticas mediastínicas contralaterales, hilares contralaterales, escalénicas homolaterales o contralaterales, o supraclaviculares.                                                                                                                                                                                                                                                                                                                |
| <b>M (metástasis a distancia)</b>         |                                                                                                                                                                                                                                                                                                                                                                                                                                                                             |
| MX                                        | Las metástasis a distancia no pueden ser evaluadas.                                                                                                                                                                                                                                                                                                                                                                                                                         |
| M0                                        | No existen metástasis a distancia.                                                                                                                                                                                                                                                                                                                                                                                                                                          |
| M1                                        | Existen metástasis a distancia.                                                                                                                                                                                                                                                                                                                                                                                                                                             |
| M1a                                       | Existencia de nódulo(s) tumoral(es) separado(s) del tumor primario, en un lóbulo del pulmón contralateral; tumor con nódulos pleurales o derrame pleural (o pericárdico) maligno <sup>b</sup> .                                                                                                                                                                                                                                                                             |
| M1b                                       | Existen metástasis a distancia.                                                                                                                                                                                                                                                                                                                                                                                                                                             |

<sup>a</sup> La poco frecuente diseminación superficial de un tumor de cualquier tamaño con su componente invasivo limitado a la pared bronquial, el cual puede extenderse proximalmente hasta el bronquio principal, se clasifica también como T1.

<sup>b</sup> La mayoría de los derrames pleurales (y pericárdicos) asociados al cáncer de pulmón son debidos al tumor. Sin embargo, hay algunos pacientes en quienes múltiples estudios citopatológicos del líquido pleural (o pericárdico) son negativos para tumor, el líquido no es hemático y no es un exudado. Cuando estos elementos y el juicio clínico indiquen que el derrame no está relacionado con el tumor, el derrame debe ser excluido como elemento de estadificación y el paciente debe ser clasificado como T1, T2, T3 o T4.

**Agrupación de estadios.** Después de un complejo análisis estadístico, se elaboraron las diferentes curvas de supervivencia que, sin solaparse entre ellas, presentaban peores cifras a medida que aumentaba la extensión tumoral. Se establece una nueva agrupación de estadios (7) (tabla 2), cuyas supervivencias a los 5 años, fueron, según estadificación clínica y patológica

respectivamente, las siguientes: IA 50% y 73%, IB 43% y 58%, IIA 36% y 46%, IIB 25% y 36%, IIIA 19% y 24%, IIIB 7% y 9% y IV 2% y 13%.

El comité de Estadificación de la IASLC analizó también los datos de pacientes con carcinoma de células pequeñas (CPCP) y tumores carcinoides. Aunque no encontraron una separación de supervivencia entre estadios tan neta como en los CPCNP, concluyen con la conveniencia de aplicar en estas estirpes la misma clasificación (10,11).

Tabla 2. Cáncer de pulmón. Clasificación TNM-estadios de la IASLC-2009. Agrupación de estadios.

|                  |             |             |       |
|------------------|-------------|-------------|-------|
| Carcinoma oculto | TX          | N0          | M0    |
| Estadio 0        | Tis         | N0          | M0    |
| Estadio IA       | T1 a,b      | N0          | M0    |
| Estadio IB       | T2a         | N0          | M0    |
| Estadio IIA      | T1 a,b      | N1          | M0    |
|                  | T2a         | N1          | M0    |
|                  | T2b         | N0          | M0    |
| Estadio IIB      | T2b         | N1          | M0    |
|                  | T3          | N0          | M0    |
| Estadio IIIA     | T1,T2       | N2          | M0    |
|                  | T3          | N1,N2       | M0    |
|                  | T4          | N0,N1       | M0    |
| Estadio IIIB     | T4          | N2          | M0    |
|                  | Cualquier T | N3          | M0    |
| Estadio IV       | Cualquier T | Cualquier N | M1a,b |

### 3.a.3. Ventajas y limitaciones de la nueva clasificación TNM

Junto a la consistencia de esta nueva clasificación, tal vez la ventaja más destacable sea la universalización de la misma, tanto en un sentido geográfico (al incluir la base de datos a pacientes procedentes de todo el mundo), como en cuanto a la modalidad terapéutica aplicada (a diferencia de la edición anterior, se incluyen también pacientes no sometidos a cirugía) y a las estirpes histológicas (se recomienda para los CPCP y los tumores carcinoides) (7,10,11).

La nueva agrupación de estadios (con la inclusión de algunos subgrupos T4N0 resecables en el estadio IIIA o la nueva consideración de los nódulos satélites) es más acorde con las posibilidades quirúrgicas. Por otro lado, la nueva subdivisión de los estadios tempranos

plantea la cuestión de si estaría indicado el tratamiento adyuvante en el nuevo estadio IB, ya que los ensayos en que se basan las recomendaciones al respecto utilizaban la anterior clasificación TNM (4,13).

La principal limitación deriva del carácter retrospectivo de las fuentes de datos empleadas, que no fueron diseñadas para estudiar dicha clasificación TNM y que a menudo carecían de detalles anatómicos precisos sobre la extensión tumoral, número y estaciones ganglionares afectadas o grado de extensión de las metástasis. En consecuencia, no se pudieron validar con significación estadística suficiente muchos de los descriptores T que siguen estando incluidos. Por este motivo la propia IASLC ha iniciado un proyecto prospectivo encaminado a actualizar de nuevo la clasificación TNM en 2016, validando todos los descriptores T, N y M, especialmente los que no lo han sido hasta ahora (12).

### *Recomendación*

-En pacientes con sospecha o diagnóstico confirmado de CP, se recomienda efectuar una cuidadosa evaluación clínica que permita establecer un estadio TNM inicial. (Grado 1B) (14).

### **Resumen de recomendaciones**

| Recomendación                                                                                                                                                    | Grado |
|------------------------------------------------------------------------------------------------------------------------------------------------------------------|-------|
| En pacientes con sospecha o diagnóstico confirmado de CP, se recomienda efectuar una cuidadosa evaluación clínica que permita establecer un estadio TNM inicial. | 1B    |

### **Bibliografía**

1. Detterbeck F. Stage classification and prediction of prognosis. Difference between accountants and speculators. J Thorac Oncol. 2013;8:820-822.
2. Rami-Porta R, Ball D, Crowley J, Giroux DJ, Jett J, Travis WD, et al. The IASLC Lung Cancer Staging Project: proposals for the revision of the T descriptors in the forthcoming (seventh) edition of the TNM classification for lung cancer. J Thorac Oncol. 2007;2:593-602.



3. Boffa DJ, Detterbeck FC, Smith EJ, Rami-Porta R, Crowley J, Zelterman D, et al. Should the 7<sup>th</sup> Edition of the Lung Cancer Stage classification system change treatment algorithms in non-small cell lung cancer. *J Thorac Oncol*. 2010;5:1779-1783.
4. Vansteenkiste JF, Shepherd FA. The seventh tumor, node, metastasis staging system and lung cancer treatment choices. *J Thorac Oncol*. 2010;5:1724-1725.
5. Hirsch FR, Spreatico A, Novello S, Wood MD, Simms L, Papotti M. The prognostic and predictive role of histology in advanced non-small cell lung cancer. *J Thorac Oncol*. 2008;3:1468-81.
6. Goldstraw P (Editor). Staging manual in thoracic oncology. Editorial Rx Press: Orange Park, Florida, USA; 2009.
7. Goldstraw P, Crowley J, Chansky K, Giroux DJ, Groome PA, Rami-Porta R et al. The IASLC Lung Cancer Staging Project: Proposals for the Revision of the TNM Stage Groupings in the Forthcoming (seventh) Edition of the TNM Classification for Lung Cancer. *J Thorac Oncol*. 2007;2:706-14.
8. Rusch VW, Crowley J, Giroux DJ, Goldstraw P, Im JG, Tsuboi M, et al. The IASLC Lung Cancer Staging Project: proposals for the revision of the N descriptors in the forthcoming seventh edition of the TNM classification for lung cancer. *J Thorac Oncol*. 2007;2:603-12.
9. Postmus PE, Brambilla E, Chansky K, Crowley J, Goldstraw P, Patz EF Jr, et al. The IASLC Lung Cancer Staging Project: proposals for revision of the M descriptors in the forthcoming (seventh) edition of the TNM classification of lung cancer. *J Thorac Oncol*. 2007;2:686-93.
10. Shepherd FA, Crowley J, Van Houtte P, Postmus PE, Carney D, Chansky K, et al. The International Association for the Study of Lung Cancer lung cancer staging project: proposals regarding the clinical staging of small cell lung cancer in the forthcoming (seventh) edition of the tumor, node, metastasis classification for lung cancer. *J Thorac Oncol*. 2007;2:1067-77.
11. Travis WD, Giroux DJ, Chansky K, Crowley J, Asamura H, Brambilla E, et al. The IASLC Lung Cancer Staging Project: proposals for the inclusion of broncho-pulmonary carcinoid tumors in the forthcoming (seventh) edition of the TNM Classification for Lung Cancer. *J Thorac Oncol*. 2008;3:1213-23.

12. Giroux D, Rami-Porta R, Chansky K, Crowley JJ, Groome PA, Postmus PE, et al. The IASLC Lung Cancer Staging Project: Data elements for the Prospective Project. *J Thorac Oncol.* 2009;4:679-85.
13. Pignon JP, Tribodet H, Scagliotti GV. Lung adjuvant cisplatin evaluation: a pooled analysis by the LACE collaboration group. *J Clin Oncol.* 2008;26:3552-3559.
14. Detterbeck FC, Lewis SZ, Diekemper R, Addrizzo-Harris DJ, Alberts WM. Diagnosis and Management of Lung Cancer. 3rd ed: American College of Chest Physicians. Evidence-Based Clinical Practice Guidelines. *Chest.* 2013;3:7S–37S.

### **3b. CLASIFICACIÓN Y ESTUDIO ANATOMOPATOLÓGICO. FACTORES PRONÓSTICOS**

Hace unos años, una subclasificación histológica de los diferentes tipos de CP era considerada poco importante para el tratamiento y pronóstico de los mismos. Básicamente, solo se consideraba necesario diferenciar entre el CPCP y el resto. Hoy día es indispensable establecer la diferenciación patológica entre adenocarcinoma, carcinoma de células escamosas y otros tipos histológicos. Esto se debe, entre otros factores, a los avances producidos en el conocimiento de rutas moleculares específicas con nuevas vías de tratamiento, así como a la caracterización de los pacientes con adenocarcinoma, que hace dirigir las terapias diana (elección de Inhibidores de Tirosin Kinasa-ITKs) en aquellos adenocarcinomas con ciertas mutaciones genéticas; también lo imponen los avances en el tratamiento de los CPCNP, con medicamentos mucho más eficaces en un tipo determinado de tumores frente a la toxicidad de algunos fármacos en otros tipos tumorales (1). Además, en muchos casos se trata de una enfermedad avanzada, no susceptible de cirugía, por lo que el diagnóstico ha de hacerse, en un porcentaje elevado de casos, en muestras pequeñas y/o citológicas (2,3).

#### **3.b.1. Clasificación histológica**

El diagnóstico anatomopatológico de los tumores pulmonares se hace de acuerdo a la clasificación de la *World Health Organization* (WHO) del año 2015 (4) (tabla 1).

Tabla 1. Clasificación de tumores epiteliales malignos invasivos de pulmón. WHO 2015 (4).

|                                                                            |
|----------------------------------------------------------------------------|
| <b>ADENOCARCINOMA</b>                                                      |
| Lepídico, acinar, papilar, micropapilar, sólido                            |
| Mucinoso invasivo                                                          |
| Mixto, mucinoso y no mucinoso                                              |
| Coloide, fetal, entérico, mínimamente invasivo                             |
| Lesiones preinvasivas: Hiperplasia adenomatosa atípica                     |
| Adenocarcinoma in situ                                                     |
| <b>CARCINOMA DE CÉLULAS ESCAMOSAS</b>                                      |
| Queratinizante, no queratinizante, basaloide                               |
| Lesión preinvasiva: carcinoma de células escamosas in situ                 |
| <b>TUMORES NEUROENDOCRINOS</b>                                             |
| Carcinoma de células pequeñas, carcinoma neuroendocrino de células grandes |
| Tumor carcinoide, hiperplasia difusa de células neuroendocrinas            |
| <b>CARCINOMA DE CÉLULAS GRANDES</b>                                        |
| <b>CARCINOMA ADENOESCAMOSO</b>                                             |
| <b>CARCINOMA SARCOMATOIDE</b>                                              |
| Pleomórfico, de células fusiformes, de células gigantes                    |
| Carcinosarcoma, blastoma pulmonar                                          |
| <b>CARCINOMAS INCLASIFICABLES Y OTROS</b>                                  |
| NUT carcinoma, carcinoma linfopitelioma-like                               |
| Tumores tipo glándula salivar                                              |

En el año 2011, un equipo multidisciplinar representando a la IASLC, la ATS y la *European Respiratory Society* (ERS), hace una propuesta de revisión de este sistema clasificatorio, referido básicamente a la clasificación del adenocarcinoma y su distinción del carcinoma de células escamosas (5). Proponen una terminología algo diferente para los diagnósticos en piezas de resección quirúrgica (tabla 2), y para los que se realizan en biopsias pequeñas y/o citologías (1) (tabla 3). Esta nueva clasificación está basada principalmente en la histología, pero además contempla datos clínicos, moleculares, radiológicos y quirúrgicos. También hacen una serie de recomendaciones para el manejo y conservación de los distintos tipos de muestras para ulteriores estudios moleculares e inmunohistoquímicos (IHQ). Alrededor de un 70% de los CP están en fase avanzada, por tanto no quirúrgica, en el momento del

diagnóstico. En estos casos solo se dispondrá de material de biopsia o citológico, muchas veces escaso, para hacer todos los estudios morfológicos, de IHQ y moleculares que se exigen en la actualidad (6). Es muy importante por ello, aprovechar la muestra al máximo, siguiendo los protocolos de diagnóstico establecidos. Se recomienda tener los resultados en 7-10 días laborables desde la recepción de la muestra.

Las muestras óptimas para el estudio molecular de los diferentes biomarcadores son las fijadas en formol e incluidas en parafina. Todos los tipos de muestras (procedentes de cirugía, broncoscopia, biopsia por punción o muestras citológicas) son válidas siempre que contengan una cantidad suficiente de células tumorales. En el material citológico se prefieren los bloques tisulares y citologías en base líquida (7).

Tabla 2. Clasificación de IASCL/ATS/ERS del Adenocarcinoma Pulmonar en piezas quirúrgicas (5).

|                                                                                                       |
|-------------------------------------------------------------------------------------------------------|
| <b>LESIONES PREINVASIVAS</b>                                                                          |
| Hiperplasia Adenomatosa Atípica.                                                                      |
| Adenocarcinoma In Situ (≤3 cm, antes BAC)                                                             |
| No Mucinoso                                                                                           |
| Mucinoso                                                                                              |
| Mixto mucinoso/no mucinoso                                                                            |
| <b>Adenocarcinoma Mínimamente Invasivo (≤3 cm tumor<br/>predominante lepidico con ≤5 mm invasion)</b> |
| No Mucinoso                                                                                           |
| Mucinoso                                                                                              |
| Mixto mucinoso/no mucinoso                                                                            |
| <b>ADENOCARCINOMA INVASIVO</b>                                                                        |
| Predominante Acinar                                                                                   |
| Predominante Papilar                                                                                  |
| Predominante Micropapilar                                                                             |
| Predominante Sólido con producción de Mucina                                                          |
| <b>Variantes de Adenocarcinoma Invasivo</b>                                                           |
| Adenocarcinoma Mucinoso Invasivo (antes mucinoso BAC)                                                 |
| Coloide                                                                                               |
| Fetal (Alto y bajo grado)                                                                             |
| Entérico                                                                                              |

BAC: Carcinoma Bronquioloalveolar. IASLC: International Association for the Study of Lung Cancer. ATS: American Thoracic Society. ERS: European Respiratory Society.

Tabla 3. Clasificación IASLC/ATS /ERS de tumores malignos de pulmón en biopsias pequeñas y citologías (5).

| 2004 OMS Clasificación                                                        | Biopsias pequeñas y/o citologías: IASLC/ATS/ERS                                                                                                                                                           |
|-------------------------------------------------------------------------------|-----------------------------------------------------------------------------------------------------------------------------------------------------------------------------------------------------------|
| Adenocarcinoma                                                                |                                                                                                                                                                                                           |
| Subtipo mixto                                                                 | Patrones morfológicos de Adc. claramente presentes:                                                                                                                                                       |
| Acinar                                                                        | Adenocarcinoma, describir los patrones presentes incluyendo el patrón micropapilar no incluido en la clasificación de la OMS 2004                                                                         |
| Papilar                                                                       | Comentario: Si hay patrón lepidico puro, decir que no se puede excluir un componente invasivo en muestra pequeña                                                                                          |
| Sólido                                                                        |                                                                                                                                                                                                           |
| Carcinoma Bronquioloalveolar no mucinoso                                      | Adenocarcinoma con patrón lepidico (si es puro, añadir nota: no puede excluirse componente invasivo)                                                                                                      |
| Bronchioloalveolar carcinoma (mucinoso)                                       | Adenocarcinoma mucinoso (describir patrones presentes)                                                                                                                                                    |
| Fetal                                                                         | Adenocarcinoma con patrón fetal                                                                                                                                                                           |
| Mucinoso (coloide)                                                            | Adenocarcinoma con patrón coloide                                                                                                                                                                         |
| Células anillo sello                                                          | Adenocarcinoma con (describir patrones presentes) y células en anillo de sello                                                                                                                            |
| Células Claras                                                                | Adenocarcinoma con (describir patrones presentes) y células claras                                                                                                                                        |
| Sin contraparte en clasificación 2004 OMS. La mayoría adenocarcinomas sólidos | No existe patrón morfológico de adenocarcinoma. Diagnóstico basado en tinciones especiales e IHQ: Carcinoma de Células No Pequeñas, probable Adenocarcinoma.                                              |
| Carcinoma de Células Escamosas                                                |                                                                                                                                                                                                           |
| Papillar                                                                      | Patrón morfológico claramente presente:                                                                                                                                                                   |
| Células Claras                                                                | Carcinoma de Células Escamosas                                                                                                                                                                            |
| Células Pequeñas                                                              |                                                                                                                                                                                                           |
| Basaloide                                                                     |                                                                                                                                                                                                           |
| Sin contraparte en OMS 2004                                                   | No hay patrón morfológico de escamoso. Diagnóstico basado en tinciones especiales e IHQ: CPCNP probable escamoso                                                                                          |
| Carcinoma de Células Pequeñas                                                 | Carcinoma de Células Pequeñas                                                                                                                                                                             |
| Carcinoma de Células Grandes                                                  | Carcinoma de Células Grandes, no especificado de otro modo (NOS)                                                                                                                                          |
| Carcinoma Neuroendocrino de Células Grandes (CNECG)                           | CPCNP con morfología NE y marcadores NE positivos posible (CNECG)                                                                                                                                         |
| Carcinoma de Células Grandes con Morfología NE                                | Carcinoma de células No Pequeñas con morfología Neuroendocrina (marcadores neuroendocrinos negativos)<br>Comentario: Es un CPCNP con sospecha de CNECG, pero las tinciones no muestran diferenciación NE. |
| Carcinoma Adenoescamoso                                                       | Patrón morfológico de adenocarcinoma y escamoso presentes: CPCNP con patrones de adenocarcinoma y escamoso.<br>Comentario: Puede representar carcinoma adenoescamoso                                      |
| Sin contraparte en la OMS 2004                                                | No hay patrón morfológico de adenocarcinoma ni escamoso, las tinciones separan ambos componentes.: CPCNP añadiendo los resultados de IHQ.<br>Comentario: Puede representar carcinoma adenoescamoso        |
| Carcinoma Sarcomatoide                                                        | CPCNP pobremente diferenciado, con carcinoma fusiforme y/o carcinoma de células gigantes (mencionar si hay presente adenocarcinoma o escamoso)                                                            |

IASLC: International Association for the Study of Lung Cancer. ATS: American Thoracic Society. ERS: European Respiratory Society. OMS Organización Mundial de la Salud. CPCNP: Cancer pulmonar de células no pequeñas. IHC: Inmunohistoquímica. NE: Neuroendocrino. CNECG: Carcinoma neuroendocrino de células grandes.

### 3.b.2. Estudio anatomopatológico.

Se consideran tres tipos de CPCNP:

**-Carcinoma de células escamosas:** Histológicamente son tumores constituidos por células de tamaño grande y citoplasma abundante. En las formas bien diferenciadas hay queratinización del citoplasma y puentes intercelulares. Se reconocen tres variantes; queratinizante, no queratinizante y basaloide. Así mismo se incluye el carcinoma de células escamosas *in situ* (lesión preinvasiva). Inmunohistoquímicamente expresan citoqueratinas de alto peso molecular y CEA. El marcador más importante, aunque no muy específico, es la P63, también P40 y las citoqueratinas 5/6 (CK5/6). También pueden expresar el factor de transcripción tiroideo (TTF-1) en un porcentaje muy pequeño de casos.

No se han descrito alteraciones moleculares relevantes (gen del factor del crecimiento epidérmico–EGFR; menos del 1%, generalmente en pacientes no fumadores).

**-Adenocarcinoma:** Actualmente es el tipo histológico más frecuente. Como los carcinomas escamosos, están constituidos por células de tamaño grande. Los núcleos son vesiculosos y claros, con nucleolo y el citoplasma es amplio, con formación de vacuolas de moco. Este tipo de tumores muestra una gran heterogeneidad, con más de un patrón morfológico dentro del mismo tumor (8). Es recomendable diferenciar entre adenocarcinoma y carcinoma de células escamosas, incluso en biopsias de pequeño tamaño o material de citología (9). Según la clasificación de la IASLC, referida a piezas de resección quirúrgica, se describen (5) cinco patrones predominantes para el adenocarcinoma invasivo (lepídico, acinar, papilar, micropapilar y sólido) y cuatro variantes (adenocarcinoma invasivo mucinoso, coloide, fetal y entérico). Algunos de estos tienen implicaciones pronósticas.

En el informe anatomopatológico hay que hacer constar el porcentaje aproximado de cada uno de los patrones predominantes que existan en cada uno de los tumores. Por otro lado, en esta clasificación del adenocarcinoma, y solo en piezas de resección quirúrgica, también se contemplan una serie de lesiones preinvasivas: hiperplasia adenomatosa atípica (HAA), adenocarcinoma *in situ* (AIS) con sus variantes mucinoso y no mucinoso y el adenocarcinoma mínimamente invasivo (MIA), generalmente no mucinoso. Se recomienda distinguir los adenocarcinomas *in situ* y los mínimamente invasivos de los adenocarcinomas invasivos (9).

Con IHQ, la expresión de TTF1 es el mejor marcador para el adenocarcinoma (cerca del 85% de positividad) independientemente del tipo de muestra. También son positivos para citoqueratina 7 (CK 7) y napsina A.

En la clasificación de la OMS el llamado adenocarcinoma bronquioloalveolar (BAC) incluía un grupo de tumores heterogéneo y con diferentes comportamientos. En la nueva clasificación, en los tumores diagnosticados como AIS, MIA, adenocarcinoma invasivo no mucinoso de patrón lepidico predominante y el adenocarcinoma mucinoso invasivo sería conveniente añadir la expresión “antes adenocarcinoma bronquioloalveolar”.

En los adenocarcinomas, además, se describen varias alteraciones moleculares con implicaciones terapéuticas y pronósticas. Las más importantes son las mutaciones EGFR (8,10) que se encuentran en alrededor del 13% de los casos; estas mutaciones son predictoras de sensibilidad al tratamiento con ITKs (4) y son más frecuentes en mujeres no fumadoras.

Otro tipo de alteración genética, también con implicación terapéutica, es la translocación del gen de la quinasa del linfoma anaplásico EML4-ALK (que se encuentra entre 1-4%), también con la posibilidad de utilización de un fármaco diana (crizotinib) autorizado recientemente.

Sin embargo, son más frecuentes las mutaciones de KRAS (hasta 40%), aunque todavía no hay fármacos diana para su tratamiento y no responden a ITKs. Son de mal pronóstico. Asimismo, se han encontrado mutaciones de ROS1, BRAF y HER2 (3 y 2%, respectivamente) con terapias diana en estudio. Todas estas mutaciones son excluyentes entre sí.

**-Tumores neuroendocrinos:** Con su variante carcinoma neuroendocrino de células grandes, que muestra diferenciación morfológica neuroendocrina y expresión positiva de marcadores neuroendocrinos por IHQ (cromogranina, sinaptofisina y CD56). Son tumores con mal pronóstico y en ellos se han descrito de forma ocasional mutaciones de EGFR.

**-Carcinoma de células grandes:** Corresponde a CP con células de tamaño grande, sin la morfología, arquitectura o la IHQ de escamoso, glandular o carcinoma de células pequeñas (11). La especificación del subtipo de todos los CPCNP es imprescindible para una decisión terapéutica. En la actualidad, la estirpe tumoral es el parámetro que va a señalar la indicación para las determinaciones genéticas específicas de cada caso y por tanto el tratamiento individualizado en cada paciente.

En general, quedan excluidos para todos estos estudios tumores como los sarcomas, así como los neuroendocrinos, y tumores menos frecuentes como carcinoma mucoepidermoide y carcinoma adenoide quístico, ya que para ellos no existe un tratamiento específico.

Por otro lado hay tumores histológicamente poco diferenciados, que con ayuda de ciertos marcadores IHQ pueden encuadrarse en uno de los tipos histológicos descritos anteriormente. El objetivo actual es reducir a menos del 10% de todos los tumores, los clasificados como CPCNP (comúnmente expresado en inglés como *not otherwise specified-NOS*) (12). En cualquier caso, es casi segura la necesidad de determinaciones anatomopatológicas o moleculares por realizar en un futuro próximo; por todo esto es importante economizar el tejido o la muestra citológica.

Figura 1. Algoritmo diagnóstico anatomopatológico.

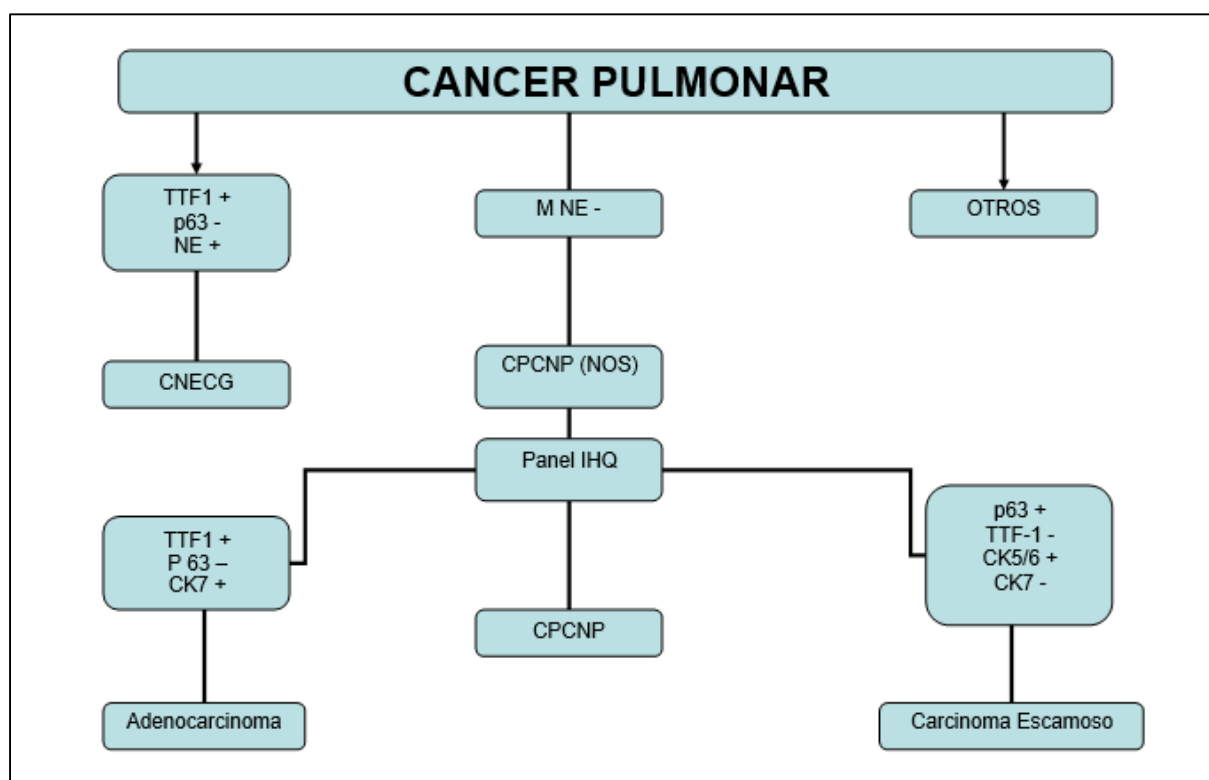

CNECG: Carcinoma neuroendocrino de células grandes. MNE: Marcadores neuroendocrinos. CPCNP: Carcinoma pulmonar de células no pequeñas. IHQ: Inmunohistoquímica. TTF-1: Factor transcripción tiroideo. CK: Citoqueratina 7,5/6.



Así pues, para llegar a un diagnóstico más preciso se propone un panel mínimo de anticuerpos, por IHQ (figura 1). Está admitido por la mayoría de los autores que con el panel que incluye TTF-1, P40, CK7 y CK5/6 y marcadores neuroendocrinos puede llegarse al diagnóstico de una estirpe tumoral casi en el 90% de los casos en todo tipo de muestras (13,14) (tanto de resección quirúrgica como de biopsia y de citología). El inmunoperfil del carcinoma escamoso es TTF-1 negativo, P40 positivo y CK5/6 positivo de forma difusa. Para el adenocarcinoma, aunque tiene un perfil más heterogéneo, se admite una positividad para TTF-1 en casi el 90%, sobre todo si es de forma difusa, y para CK 7.

### *Recomendaciones*

-En pacientes con diagnóstico de CPNCP, se recomienda la diferenciación entre adenocarcinoma y carcinoma de células escamosas, incluso en biopsias de pequeño tamaño o material de citología (Grado 1B).

-En pacientes con tumores glandulares (adenocarcinomas) se recomienda distinguir los adenocarcinomas *in situ* y los mínimamente invasivos de los adenocarcinomas invasivos (Grado 1C).

### **3.b.3. Factores pronósticos.**

Permiten identificar pacientes con mayor riesgo de progresar la enfermedad. El factor pronóstico más importante es el estadio de extensión según la clasificación TNM (14,15). Sin embargo cada día cobra más importancia la influencia de factores no anatómicos sobre el pronóstico. El subtipo histológico por ejemplo está asociado a una conducta más o menos agresiva: el adenocarcinoma tiene mayor capacidad de presentar metástasis ganglionares y a distancia que los escamosos, y dentro de los primeros, los tumores de patrón sólido y micropapilar, suelen tener conducta más agresiva que el patrón lepidico no mucinoso en el que existe menor capacidad de diseminación. También la invasión vasculolinfática (todavía factor opcional en la clasificación TNM) empeora el pronóstico (16).

Se han descrito múltiples alteraciones genéticas y moleculares que afectan a protooncogenes, genes supresores y genes reparadores del ADN. Ahora se conocen varias

alteraciones moleculares relevantes con implicación clínica y pronóstica, al disponerse de fármacos específicos para un tratamiento individualizado.

Hay unos biomarcadores predictivos de respuesta al tratamiento diana con ITKs. El más importante, por su frecuencia, es la mutación de EGFR: solo las delecciones en el exón 19 y las mutaciones puntuales en el exón 21 (L858R) han demostrado valor predictivo de respuesta (17). Otras mutaciones menos frecuentes, en el exón 18 o 21(L861Q) y en el 20, tienen un significado incierto. La mutación T790M en el exón 20 es importante porque está asociada a resistencia a ITKs. El segundo más importante corresponde a las translocaciones de ALK. Las mutaciones de KRAS están asociadas a menor supervivencia total y supervivencia libre de progresión (18).

Hay que hacer determinación de EGFR sistemáticamente en casos de tumores en estadios avanzados, excepto en los escamosos. En este tipo histológico, puede plantearse su determinación, solo en pacientes nunca fumadores. La determinación de translocación de ALK debe hacerse en los casos de adenocarcinomas en que el EGFR ha resultado negativo (*Wild-type* o nativo, es decir no mutado). Si este fuera así mismo negativo puede hacerse mutación de KRAS (19-21).

### Recomendación

- Se debe realizar la determinación de las mutaciones en el gen EGFR y los reordenamientos de ALK en todos los pacientes con CPCNP, no escamoso, en estadio IV, independientemente del hábito tabáquico y en todos los pacientes no fumadores, independientemente de la histología del tumor (Grado 1B).

### Resumen de recomendaciones

| Recomendación                                                                                                                                                                                | Grado |
|----------------------------------------------------------------------------------------------------------------------------------------------------------------------------------------------|-------|
| En pacientes con diagnóstico de CPNCP, se recomienda la diferenciación entre adenocarcinoma y carcinoma de células escamosas, incluso en biopsias de pequeño tamaño o material de citología. | 1B    |
| En pacientes con tumores glandulares (adenocarcinomas) se recomienda distinguir los adenocarcinomas <i>in situ</i> y los mínimamente invasivos de los adenocarcinomas invasivos.             | 1C    |

|                                                                                                                                                                                                                                                                                             |    |
|---------------------------------------------------------------------------------------------------------------------------------------------------------------------------------------------------------------------------------------------------------------------------------------------|----|
| Se debe realizar la determinación de las mutaciones en el gen EGFR y los reordenamientos de ALK en todos los pacientes con CPCNP, no escamoso, en estadio IV, independientemente del hábito tabáquico y en todos los pacientes no fumadores, independientemente de la histología del tumor. | 1B |
|---------------------------------------------------------------------------------------------------------------------------------------------------------------------------------------------------------------------------------------------------------------------------------------------|----|

## Bibliografía

1. Nicholson AG, Gonzalez D, Shah P, Pynegar MJ, Deshmukh, M, Rice A, et al. Refining the diagnosis and EGFR status of non-small cell lung carcinoma in biopsy and cytologic material, using a panel of mucin staining, TTF1, cytokeratin 5/6, and P63, and EGFR mutation analysis. *J Thorac Oncol.* 2010;5:436-441.
2. Davison MR, Gazdar AF, Clarke BE. The Pivotal role in the management of lung cancer. *J Thorac Dis.* 20135(Suppl 5):S463-S478.
3. Sterlacci W, Spasenija S, Schmid T, Oberaigner W, Auberger J, Fiegl M, et al. Tissue-Sparing Application of the Newly Proposed IASLC/ATS/ERS Classification of Adenocarcinoma of the Lung Shows Practical Diagnostic Impact. *Am J Clin Pathol.* 2012;137:946-956.
4. Travis WD, Brambilla E, Burke AP, Marx A, Nicholson AG, editors. World Health Organization Classification of Tumours of the Lung, Pleura, Thymus and Heart. WHO classification of tumours. International Agency for Research on Cancer. Lyon, France: 2015.
5. Travis WD, Brambilla E, Noguchi M, Nicholson A, Geisinger KR, Yatabe Y, et al. IASLC/ATS/ERS Internacional Multidisciplinary Classification of Lung Adenocarcinoma. *J Thorac Oncol.* 2011;6:244-285.
6. Travis WD, Rekhtman N, Riley GJ, Geisinger KR, Asamura H, Brambilla E, et al. Pathologic diagnosis of advanced lung cancer based on small biopsies and cytology. A paradigm shift. *J Thorac Oncol.* 2010;5:411-4.
7. Libro Blanco de la Anatomía Patológica en España 2015.
8. Kerr KM. Pulmonary adenocarcinomas: classification and reporting. *Histopathology* 2009;54:12-27.

9. Schwartz AM, Rezaei MK. Diagnostic Surgical Pathology in Lung Cancer. Diagnosis and Management of lung Cancer, 3rd ed: American Collage of Chest Physicians Evidence-Based Clinical Practice Guidelines. Chest. 2013;143(suppl):e251S-e262S.
10. Pirker R, Herth FJF, Kerr KM, Filipits, Taron M, Gandara D, et al. Consensus for EGFR mutation testing in non-small cell lung cancer .Results from a European workshop. J Thorac Oncol. 2010;5:1706-13.
11. Wallace, WA. The challenge of classifying poorly differentiated tumours in the lung. Histopathology. 2009;54:28-42.
12. Rossi G, Pelosi G, Graciano P, Barbareschi M and Papotti M. A Reevaluation of the Clinical Significance of Histological Subtyping of Non- Small-Cell Lung Carcinoma: Diagnostic Algorithms in the Era of Personalizad Tratments. Inter J Surg Pathol. 2009;17:206-18.
13. Peters S, Adjei AA, Gridelli C, Reck M, Kerr K, Felip E. Metastatic non-small-cell lung cancer (NSCLC): ESMO Clinical Practice Guidelines for diagnosis, treatment and follow-up. Ann Oncol 23 (Supplement 7):Vii 56- Vii64 2012 doi:10.1093/annonc/mds226.
14. Rekhtman N, Ang DC, Sima CS, Travis WD, Moreira AL. Immunohistochemical algorithm for differentiation of lung adenocarcinoma and squamous cell carcinoma based on large series of whole-tissue sections with validation in small specimens. Mod Pathol. 2011;24:1348-1359.
15. León P, Moreno N, González F, Cañizares MA, García MD, Genovés M, et al. Análisis multicéntrico de supervivencia y factores pronósticos en el carcinoma no microcítico de pulmón en estadio I patológico según la nueva clasificación TNM de 2009. Arch Bronconeumol. 2011;47:441-446.
16. Yoshizawa A , Motoi N, Riely GJ, Sima CS, Gerald WL, Kris MG, et al. Impact of proposed IASLC/ATS/ERS classification of lung adenocarcinoma: prognostic subgroups and implications for further revision of staging based on analysis of 514 stage I cases. Mod Pathol. 2011;24:653-6.
17. Gomez JJ, Concha A, Felip E, Isla D, López-Ríos F, Paza Ares L, et al. Recomendaciones para la determinación de biomarcadores en el carcinoma de pulmón no microcítico avanzado. Consenso nacional de la Sociedad Española de Anatomía Patológica y de la Sociedad Española de Oncología Médica. Rev Esp Patol. 2012;45:14-18.

18. Langer CJ. Roles of EGFR and KRAS Mutations in the Treatment of Patients with Non-Small-Cell Lung Cancer. *P T*. 2011;36:263-279.
19. Lindeman NI, Cagle PT, Beasley MB, Chitale DA, Dacic S, Giaccone G, et al. Molecular testing guideline for selection of lung cancer patients for EGFR and ALK tyrosine kinase inhibitors: guideline from the College of American Pathologists, International Association for the Study of Lung Cancer, and Association for Molecular Pathology. *Arch Pathol Lab Med*. 2013;137:828-60.
20. Felip E, Concha A, de Castro J, Gómez-Román J, Garrido P, Ramirez J, et al. Biomarker testing in advanced non –small-cell lung cancer: a National Consensus of the Spanish Society of Pathology and the Spanish Society of Medical Oncology. *Clin Transl Oncol*. 2015;17:103-12.
21. López-Rios F, de Castro J, Concha A, Garrido P, Gómez–Román J, Isla D, et al. Actualización de las recomendaciones para la determinación de biomarcadores en el carcinoma de pulmón avanzado de célula no pequeña. Consenso Nacional de la Sociedad Española de Anatomía Patológica y de la Sociedad Española de Oncología Médica. *Rev Esp Patol*. 2015;48:80-89.

### **3.c. MÉTODOS NO INVASIVOS. CITOLOGÍA DE ESPUTO**

#### **3.c.1. Citología de esputo**

El esputo es el fluido biológico más accesible para el análisis de las células exfoliadas del árbol bronquial y la citología de esputo es el procedimiento diagnóstico más económico y menos invasivo para el estudio de pacientes con sospecha de CP al detectar la morfología aberrante de las células tumorales (1).

Aunque en países desarrollados las muestras broncoscópicas han desplazado a la citología de esputo, esta técnica puede ser una herramienta de gran interés para los pacientes con sospecha de neoplasia avanzada y/o marcada afectación del estado general en los que sólo se quiere confirmar la enfermedad, evitando cualquier riesgo, en pacientes con carcinoma

microcítico o en aquellos que rechazan otros procedimientos invasivos como la broncoscopia o punción transtorácica.

Además de su economía y sencillez, el análisis de la citología del esputo tiene la ventaja de recoger material de todo el aparato respiratorio. No obstante, cuando una citología de esputo es positiva, no proporciona información de la localización precisa del tumor (ni tan siquiera si el origen ha sido del árbol bronquial, esófago o más superior en laringe o boca) (2), ni de la extensión neoplásica en el árbol bronquial, por lo que en los pacientes con cáncer y candidatos a tratamiento quirúrgico, la broncoscopia seguirá siendo necesaria para establecer la resecabilidad y descartar segundas neoplasias.

La calidad del esputo y la preservación son muy importantes para obtener un resultado certero. Debe explicarse al paciente la diferencia entre la expulsión de secreciones bronquiales mediante la expectoración y la de saliva para evitar la esta última. El esputo más rentable es el primero de la mañana, al ser el más celular por el acúmulo de secreciones durante la noche. La recogida del esputo debe realizarse antes de desayunar, sin limpiarse los dientes, tras enjuagarse la boca con agua y mejor aún después la realización de gargarismos con una solución salina. La expectoración se realizará tras varias inspiraciones profundas con un fuerte golpe de tos. Según las preferencias del laboratorio de citopatología, el esputo se recogerá en fresco o en solución fijadora. Cada muestra de esputo fresco se expulsará en un recipiente de plástico, estéril, de boca ancha y se enviará inmediatamente para su procesado al laboratorio o, si no es posible la entrega inmediata, se guardará hasta no más de 24 horas en el frigorífico. Si se va a demorar la entrega más de 24 horas, se recomienda añadir una solución de alcohol etílico al 50% o 70%. Si se va a procesar mediante el método de Saccomanno, el esputo individual o el obtenido en varios días se depositará en un recipiente de plástico con una solución de alcohol etílico al 50% y polietilenglicol al 2% (Carbowax) para su procesado.

La rentabilidad de la citología de esputo depende de variables relacionadas con la muestra y características del tumor. Es necesaria una correcta recogida del esputo, con un número suficiente de especímenes, manteniendo una preservación correcta y un procesado adecuado de las mismas. Se obtiene una mayor rentabilidad en tumores centrales, de mayor tamaño y cuando se presentan con clínica de hemoptisis (3).

Se recomiendan al menos tres muestras en días diferentes. Con el análisis de una única muestra, la sensibilidad puede ser del 68%, con dos del 78% y con tres o más esputos del 86% (4). En tumores centrales la rentabilidad es del 71% mientras que en lesiones periféricas es del

49% (3). Las revisiones sistemáticas (3,5,6) sobre la rentabilidad diagnóstica de la citología de esputo estiman una sensibilidad comprendida entre el 42% y el 97% y una especificidad entre el 68 y 100%, con una sensibilidad y especificidad globales del 66% y 99%, pero destacando una importante heterogeneidad en las publicaciones.

La citopreparación con nuevas técnicas como el Thin-Prep puede mejorar la rentabilidad de la citología de esputo (7), al igual que se ha sugerido que el esputo inducido comparado con la expectoración espontánea puede aumentar la rentabilidad en lesiones periféricas y de menor tamaño (8).

Las técnicas de biología molecular aplicadas en el esputo pueden diagnosticar, dependiendo de los métodos utilizadas, entre un 30-50% de los pacientes con mutación del EGFR evitando otras muestras (9).

### *Recomendación*

-La citología de esputo en un método sencillo y no invasivo, pero con una sensibilidad variable dependiendo de las condiciones de recogida, procesado y características del tumor. Un resultado negativo debe continuarse con otras pruebas diagnósticas invasivas (Grado 1C).

### **Resumen de recomendaciones**

| Recomendación                                                                                                                                                                                                                                                      | Grado |
|--------------------------------------------------------------------------------------------------------------------------------------------------------------------------------------------------------------------------------------------------------------------|-------|
| La citología de esputo en un método sencillo y no invasivo, pero con una sensibilidad variable dependiendo de las condiciones de recogida, procesado y características del tumor. Un resultado negativo debe continuarse con otras pruebas diagnósticas invasivas. | 1C    |

## Bibliografía

1. D'Urso V, Doneddu V, Marchesi I, Collodoro A, Pirina P, Giordano A, et al. Sputum análisis: non-invasive early lung cancer detection. *J Cell Physiol*. 2013;228:945-951.
2. Mehta AC, Marty JJ, Lee FYW. Sputum cytology. *Clin Chest Med*. 1993;14:69-85.
3. Rivera MP, Mehta AC, Wahidi MM. Establishing the diagnosis of lung cancer: Diagnosis and management of lung cancer, 3rd ed: American College of Chest Physicians evidence-based clinical practice guidelines. *Chest*. 2013;143(5 Suppl):e142S-65S.
4. Böcking A, Biesterfeld S, Chatelain R, Gien-Gerlach G, Esser E. Diagnosis of bronchial carcinoma on sections of paraffin embedded sputum. Sensitivity and specificity of an alternative to Sputum cytology. *Acta Cytol*. 1992;36:37-47.
5. Schreiber G, McCrory DC. Performance characteristics of different modalities for diagnosis of suspected lung cancer: summary of published evidence. *Chest*. 2003;123(suppl 1):115S-128S.
6. Rivera MP, Mehta AC. Initial diagnosis of lung cancer: ACCP evidence-based clinical practice guidelines (2nd ed). *Chest*. 2007;132(suppl 3):131S-148S.
7. Choi YD, Han CW, Kim JH, Oh IJ, Lee JS, Nam JH, et al. Effectiveness of sputum cytology using ThinPrep method for evaluation of lung cancer. *Diagn Cytopathol*. 2008;36:167-71.
8. Agustí C, Xaubet A, Montón C, Solé M, Soler N, Carrión M, et al. Induced sputum in the diagnosis of peripheral lung cancer not visible endoscopically. *Respir Med*. 2001;95:822-8.
9. Hubers AJ, Neuderman DA, Yatabe Y, Wood MD, Tull J, Tarón M, et al. EGFR mutation análisis in sputum of lung cancer patients: a multitechnique study. *Lung Cancer* 2013; 82: 38-43.



### **3.d. TÉCNICAS MÍNIMAMENTE INVASIVAS: BRONCOSCOPIA, PUNCIÓN TRANSBRONQUIAL CIEGA (PTB), ULTRASONOGRAFIA ENDOBRONQUIAL (EBUS), ULTRASONOGRAFÍA ENDOSCÓPICA DIGESTIVA (EUS), BRONCOSCOPIA DE NAVEGACIÓN ELECTROMAGNÉTICA (BNE), PUNCIÓN ASPIRATIVA CON AGUJA FINA (PAAF), TORACOCENTESIS-BIOPSIA PLEURAL. PUNCIÓN ASPIRATIVA TRANSTORÁCICA CON AGUJA FINA (PAAFT)**

Durante los últimos años, los casos de pacientes que presentan CPCNP han aumentado tanto en número como en complejidad (1). El 75% de los pacientes presentan síntomas, enfermedad metastásica o localmente avanzada en el momento del diagnóstico. Sabiendo que una detección temprana es vital, surge el requerimiento de nuevas estrategias de intervención que ayuden a conseguir esto y que conlleven una mejoría en el diagnóstico de esta enfermedad.

El desarrollar una adecuada cadena de intervención, que incluya prevención, el diagnóstico en fases tempranas y una estadificación correcta, es muy importante para ofrecer a estos pacientes un tratamiento y seguimiento adecuados. Es aquí donde las técnicas mínimamente invasivas ofrecidas por la Neumología Intervencionista cobran importancia, haciendo de estos procedimientos herramientas importantes en la detección temprana del CP. El papel del neumólogo en el CPCNP ha evolucionado desde un enfoque tardío a una intervención temprana más personalizada y multidisciplinar (2).

La situación clínica de estos pacientes en el momento del diagnóstico es a veces complicada, ya que la comorbilidad que les acompaña con frecuencia es grave. Esto limita el alcance de los métodos convencionales, haciendo del intervencionismo broncoscópico una herramienta diagnóstica fiable y segura, minimizando el riesgo al que se enfrentan, especialmente en aquellos casos considerados no candidatos a ningún procedimiento quirúrgico (3).

Acceder a bronquios segmentarios y subsegmentarios del árbol traqueobronquial mediante técnicas broncoscópicas convencionales, por poner un ejemplo, puede resultar muy complicado debido a su tamaño y localización. El desarrollo de nuevas técnicas en

intervencionismo broncoscópico ha conseguido que se pueda acceder a lesiones en la periferia pulmonar, logrando superar esta limitación. Entre estas destacan la broncoscopia por navegación electromagnética (BNE) y la ultrasonografía endobronquial (EBUS) radial. Recientemente se han incorporado nuevas técnicas que permiten mejorar el diagnóstico en lesiones precancerosas, como pueden ser la imagen de banda estrecha (*narrow band imaging* - NBI), la autofluorescencia (AF) y la tomografía por coherencia óptica (TCO) (4).

Los diferentes subtipos histológicos del CP suponen un desafío, debido a su prevalencia a escala global en todos los cánceres, siendo los más importantes el escamoso y el adenocarcinoma. Este último, además de haber aumentado su incidencia en un 40%, presenta el problema de su localización periférica sin visión endoscópica, que limita mucho la rentabilidad de los procedimientos convencionales. Técnicas como la BNE o el EBUS radial se postulan como alternativas fiables y seguras que, además, aumentan la rentabilidad (5).

Las metástasis mediastínicas linfáticas pueden detectarse inicialmente por métodos no invasivos, como la TC y la PET. Una vez hecho esto, es necesario obtener muestras de los ganglios patológicos y realizar estudios que permitan la estadificación ganglionar y conocer la estirpe histológica para un adecuado tratamiento (6). El riesgo de enfermedad oculta hace necesario pronosticar y estadificar adecuadamente la afectación de los ganglios linfáticos. Existen estudios donde se registra una afectación N2 en el 6,5% de los pacientes con CPCNP en estadio clínico I por TC y PET (7). Estos resultados nos obligan a confirmar la estadificación y reestadificación de pacientes, para poder ofrecer el tratamiento más idóneo.

Si se compara la EBUS lineal con la TC y el PET en la estadificación del CP, se comprueba que el primero aporta una mayor sensibilidad, especificidad y valor predictivo positivo en la estadificación de los ganglios linfáticos, tanto a nivel mediastínico como hilar (8) (tabla 1).

En el proceso diagnóstico para la detección temprana del CP, los procedimientos mínimamente invasivos han hecho que el intervencionismo neumológico concentre su desarrollo en nuevos procedimientos diagnósticos y terapéuticos endobronquiales. Ejemplos de esto son la broncoscopia rígida con sus respectivas terapias (láser endobronquial, electrocauterio, braquiterapia, crioterapia y stent), y técnicas diagnósticas como EBUS, ultrasonografía endoscópica (EUS) y BNE.

Los procedimientos endoscópicos mínimamente invasivos son económicos y seguros, con una alta rentabilidad, aunque requieren una curva de aprendizaje y una progresiva integración en los algoritmos diagnósticos y de manejo en la clínica diaria.

Tabla 1. Comparación EBUS versus TC y PET en la estadificación de CPCNP (8).

|           | Sensibilidad (%) | Especificidad (%) | Precisión diagnóstica (%) |
|-----------|------------------|-------------------|---------------------------|
| TC        | 76,9             | 55,3              | 60,8                      |
| PET       | 80               | 70,1              | 72,5                      |
| EBUS-PAAF | 92,3             | 100               | 98                        |

TC: Tomografía computarizada. PET: Tomografía por emisión de positrones. EBUS-PAAF: Ultrasonografía endobronquial-punción aspirativa con aguja fina.

### *Recomendación*

- Ante la sospecha de CP con afectación mediastínica por técnicas de imagen y sin evidencia de enfermedad metastásica extratorácica (PET negativa), se recomienda establecer el diagnóstico de CP con el método menos invasivo y más seguro (broncoscopia convencional con PTB, EBUS con PAAF, EUS con PTB, punción transtorácica o mediastinoscopia) (Grado 1C).
- Ante el hallazgo en TC o PET de una lesión sugestiva de metástasis única, ésta debe confirmarse por citohistología, especialmente en pacientes potencialmente quirúrgicos (Grado 2A).

### **3.d.1. Métodos diagnósticos**

#### *3.d.1.a. Autofluorescencia*

La AF es una técnica endoscópica que se basa en las diferencias de espectro visuales en la mucosa bronquial. Dependiendo de sus condiciones, la absorción de la luz variará, lo que permite distinguir las zonas sanas de las patológicas. Las imágenes se tratan mediante un proceso de integración de las diferentes longitudes de onda obtenidas al iluminar la mucosa traqueobronquial y empleando filtros de banda roja y verde. Así se consiguen diferenciar las zonas de la mucosa normal, que se visualiza de color verde, de las zonas patológicas, que presentan un aspecto más rojizo o marrón.

Mediante la AF se pueden detectar en fase precoz lesiones precancerosas, como la hiperplasia de la capa basal, el metaplasma, la displasia, el carcinoma in situ (CIS) y el carcinoma microinvasivo. La AF también permite apreciar los márgenes de afectación tumoral, consiguiendo una información crucial para valorar en los casos extremos los límites de resección quirúrgica en casos seleccionados. Su principal limitación es que no permite diferenciar la displasia de las alteraciones inflamatorias, lo que conlleva una alta tasa de falsos positivos (9).

#### 3.d.1.d. *Broncoscopia con imagen de banda estrecha*

Es una técnica broncoscópica basada en la aplicación de filtros sobre la imagen obtenida al realizar una exploración, lo que permite incrementar el contraste y la resolución con la que se observa la micro-estructura de las paredes bronquiales, los vasos y capilares de la mucosa y las diferentes capas de la pared bronquial.

La NBI es efectiva para diferenciar lesiones precancerosas vasculares, como la displasia angiogénica escamosa, que se manifiesta mediante la colección anormal de vasos presentando células displásicas dentro de la mucosa bronquial. La NBI ha mostrado mayor sensibilidad en detectar displasia angiogénica escamosa si se compara con la luz blanca y la AF broncoscópica.

La AF y la NBI son herramientas alternativas en la detección temprana del CP, con una precisión diagnóstica similar aunque ambos presentan un elevado número de falsos positivos. La ACCP recomienda la NBI o AF, cuando se dispone de ellas, para delimitar los márgenes tumorales en pacientes que podrían ser candidatos a una resección temprana del CP (10).

#### 3.d.1.c. *Tomografía por coherencia óptica*

Es una técnica que consiste en la emisión de luz a gran intensidad (no son ultrasonidos ni tampoco son radiaciones) para obtener una imagen casi histológica, con la limitación de que solo alcanza unos 3 mm de profundidad. La TCO se realiza a través de un catéter óptico que no requiere contacto y, por medio de infrarrojos, obtiene imágenes microscópicas con una resolución espacial que permite distinguir lesiones pre-neoplásicas y CIS. Esta técnica permite explorar la membrana basal y detallar su disrupción como signo de microinvasión, pero no discrimina la displasia de alto grado del CIS (11).

### **3.d.2 Procedimientos de estadificación invasivos no quirúrgicos**

#### **3.d.2.a. Punción transbronquial ciega o convencional**

Desarrollada a mediados de los 80 por el Dr. Wang, permite la obtención de muestras citológicas e histológicas de ganglios hiliares y mediastínicos mediante la realización de punciones transbronquiales a ciegas a través del canal del broncoscopio. Esta técnica sigue vigente y es más rápida y económica que el EBUS, siempre y cuando se cuente con personal experimentado. Sin embargo, la rentabilidad diagnóstica es inferior a la de la EBUS, que, a diferencia de la punción transbronquial ciega o convencional (PTB), presenta la ventaja de permitir la visualización de la punción en tiempo real (12).

La precisión diagnóstica en las técnicas habituales, como el lavado bronquial, cepillado y biopsias se incrementa con la asociación de PTB consiguiendo así el diagnóstico de CP en un 61,1% sin incrementar las complicaciones, concluyendo la seguridad de esta técnica. Su precisión diagnóstica puede incrementarse si se combina la broncoscopia convencional con una EBUS o EUS (13).

La sensibilidad de la PTB puede verse influenciada por factores como son el tamaño de los ganglios y la localización en el TC y la experiencia del broncoscopista. Se consideran patológicas por TC las adenopatías con un diámetro menor superior a 9 mm. También aumenta la rentabilidad cuando se dispone de la posibilidad de realizar el estudio citológico intra-procedimiento (ROSE). Su eficacia diagnóstica es cercana a la de la EBUS si se realiza en la región subcarinal, mientras que disminuye en el resto de las regiones (58% respecto a 84%) (12).

En los casos con sospecha de CP basada en técnicas de imagen y sin evidencia de enfermedad metastásica extratorácica (PET-TC negativo), se debe realizar un estudio de extensión con procedimientos mínimamente invasivos y seguros como PTB, EBUS o EUS. Se consideran positivos por PET-TC los ganglios torácicos con una captación superior a un SUV de 3, siendo este un punto de corte de alta sensibilidad pero baja especificidad. Para pacientes con sospecha de estación ganglionar N2 - N3, se recomienda la combinación del EBUS/EUS como la mejor prueba para la estadificación (14). Todos los estudios muestran la superioridad del EBUS sobre la PTB convencional, ya que presenta una mayor sensibilidad, especificidad y seguridad en el procedimiento, aunque siempre hay que tener en cuenta la experiencia del personal y la disponibilidad de equipamiento de cada unidad.

#### 3.d.2.b. *Punción aspirativa con aguja fina*

La punción aspirativa con aguja fina (PAAF) es una técnica diagnóstica que consiste en la punción con una aguja específica de un ganglio linfático u otra lesión pulmonar en estudio, para su posterior análisis anatomopatológico. Su combinación con la EBUS/EUS permite la evaluación y estadificación de ganglios linfáticos mediastínicos en pacientes con CP. Es un procedimiento mínimamente invasivo que mejora la sensibilidad, especificidad y precisión diagnóstica y reduce la necesidad de la mediastinoscopia u otros procedimientos tradicionales (toracotomía), más agresivos y de mayor coste. Las muestras citológicas e histológicas que se toman por medio de esta prueba dan lugar a mejores resultados, que pueden complementarse con otras técnicas, tanto inmunohistoquímicas como de estudio molecular, que permiten una estadificación y caracterización del CP más exacta (15).

#### 3.d.2.c. *Ultrasonografía endobronquial y ultrasonografía endoscópica digestiva*

La EBUS es un procedimiento mínimamente invasivo que se realiza con sedación consciente o anestesia general. La evaluación de las muestras de las adenopatías hiliares y mediastínicas se realiza en tiempo real por ultrasonografía, ya sea endobronquial o endoscópica, haciendo más precisa la estadificación de la patología en estudio. La EBUS está indicada para la valoración de los ganglios linfáticos mediastínicos e hiliares, siendo accesibles todas las regiones excepto las áreas 5, 6, 8 y 9.

### 3.d.2.c.1 Rentabilidad e indicaciones

Yasufuku tomó muestras de ganglios linfáticos mediastínicos por medio de la EBUS demostrando una sensibilidad de 94,6% y especificidad del 100% con precisión diagnóstica del 96%. El mismo autor comparó la rentabilidad de la EBUS con la mediastinoscopia en 153 pacientes con cáncer potencialmente resecable con afectación ganglionar en regiones N2-N3, obteniendo una sensibilidad de 85% y 79% respectivamente con especificidad similar del 100% concluyendo que se debe realizar la EBUS antes de la mediastinoscopia al tener menos morbilidad, coste, estancias hospitalarias y similar rentabilidad (16). Otros estudios han descrito la capacidad de la EBUS para diferenciar los ganglios linfáticos benignos de los malignos obteniendo una sensibilidad del 95%, especificidad del 100% y precisión diagnóstica de 97,1%. En 2014 surge una actualización del algoritmo de estadificación mediastínica publicado por la Sociedad Europea de Cirugía Torácica (ESTS) en el año 2007, en la que se indica que, en casos de adenopatías o captación patológica de ganglios linfáticos mediastínicos en el PET, se requiere confirmación citológica. Las guías recomiendan la EBUS/EUS como primera opción en el diagnóstico y estadificación de adenopatías mediastínicas e hiliares, al ser técnicas mínimamente invasivas y de elevada sensibilidad. Aunque algunos recomiendan realizar mediastinoscopia videoasistida ante un resultado negativo (17,18,19), la mayor experiencia y rendimiento actual con EBUS/EUS hacen aconsejable recurrir a dicho procedimiento sólo en caso de resultado dudoso o no valorable (ver el algoritmo de estadificación ganglionar del mediastino en la figura 1 del capítulo 3.e). La combinación de estadificación endoscópica y quirúrgica presenta mayor precisión (20,21).

Herth ha publicado su experiencia con 502 pacientes, a los que se realizaron un total de 572 punciones en ganglios linfáticos con 535 diagnósticos (94%), presentando una sensibilidad de 92%, especificidad del 100% y un valor predictivo positivo de 93%. El mismo autor ha descrito que en ganglios menores a 1cm, es decir, radiológicamente no patológicos, la EBUS presenta una sensibilidad para detectar malignidad del 92,3% y una especificidad de 100% con un valor predictivo negativo del 96,3%. De estos hallazgos se deduce que se deben puncionar las adenopatías mediastínicas que se encuentren al realizar una exploración con EBUS, siempre que sean superiores a los 5 mm en su diámetro menor. Se logra así evitar exploraciones quirúrgicas innecesarias en uno de cada 5 pacientes que no tenían evidencia de enfermedad mediastínica por TC (22).

La EBUS se ha incorporado eficazmente al campo de la neumología, debido a su bajo riesgo de complicaciones y gran utilidad en la evaluación de los ganglios linfáticos hiliares y mediastínicos en el cáncer de pulmón, con una sensibilidad de 88% y especificidad de 100%. Por todo ello, esta técnica goza en la actualidad de un claro protagonismo en las guías de prevención, diagnóstico, terapia y post-tratamiento del cáncer pulmonar. Diversos estudios sugieren que la implementación de métodos diagnósticos endoscópicos mínimamente invasivos, como la EBUS y la EUS, reduce la necesidad de realizar una estadificación quirúrgica del mediastino, en el estudio de extensión del carcinoma broncogénico. En los pacientes que presentan afectación adenopática en las áreas paraesofágicas o mediastínicas posterior e inferior se suele precisar de la realización de EUS al no poderse alcanzar con EBUS (23).

Estudios recientes han comparado la mediastinoscopia con la EBUS y la EUS mostrando una sensibilidad de 79% y 85% respectivamente, cifra que mejora hasta un 94% si se combinan los dos procedimientos (24).

Las complicaciones de la EBUS son similares a las que presenta la PTB convencional. Se observan algunas diferencias dependiendo del centro y la experiencia del broncoscopista, siendo este último el factor de más importancia, con cifras que varían desde el 0,03% hasta el 1,79%. La principal complicación es el sangrado (0,73%), que es autolimitado, en la mayoría de veces tras la punción. Otras complicaciones son el neumotórax, neumomediastino, infección, broncoespasmo y laringoespasmo (25).

Por tanto, la combinación EBUS/EUS ha permitido aumentar la seguridad y la precisión diagnóstica, así como ahorro en costes. Esto permite la valoración de todas las estaciones ganglionares mediastínicas, a excepción de la región 6. Hay trabajos que encuentran una afectación de hasta el 32,9% de los ganglios menores de 1 cm, combinando estas dos técnicas en pacientes diagnosticados de CP (26). Según los datos obtenidos en otros estudios, la EBUS por sí sola presentaba una sensibilidad de 79%, especificidad de 100% y precisión diagnóstica de 84%, cifras que ascendían hasta el 100% si combinaba con EUS (27).

En la figura 1 se pueden observar las diferentes regiones ganglionares según el método diagnóstico por el que se puede acceder a ellas, de acuerdo con la última edición del TNM. Se muestran las áreas accesibles a la EBUS (ganglios color rojo) y a la EUS (color verde), así como las áreas no accesibles por ultrasonografía (ganglios color gris oscuro) (28).



Al revisar la rentabilidad de las distintas técnicas broncoscópicas mínimamente invasivas en la estadificación del mediastino en los casos de CPCNP, se observan excelentes resultados en todas ellas (29) (tabla 2).

Figura 1. Ganglios linfáticos regionales.

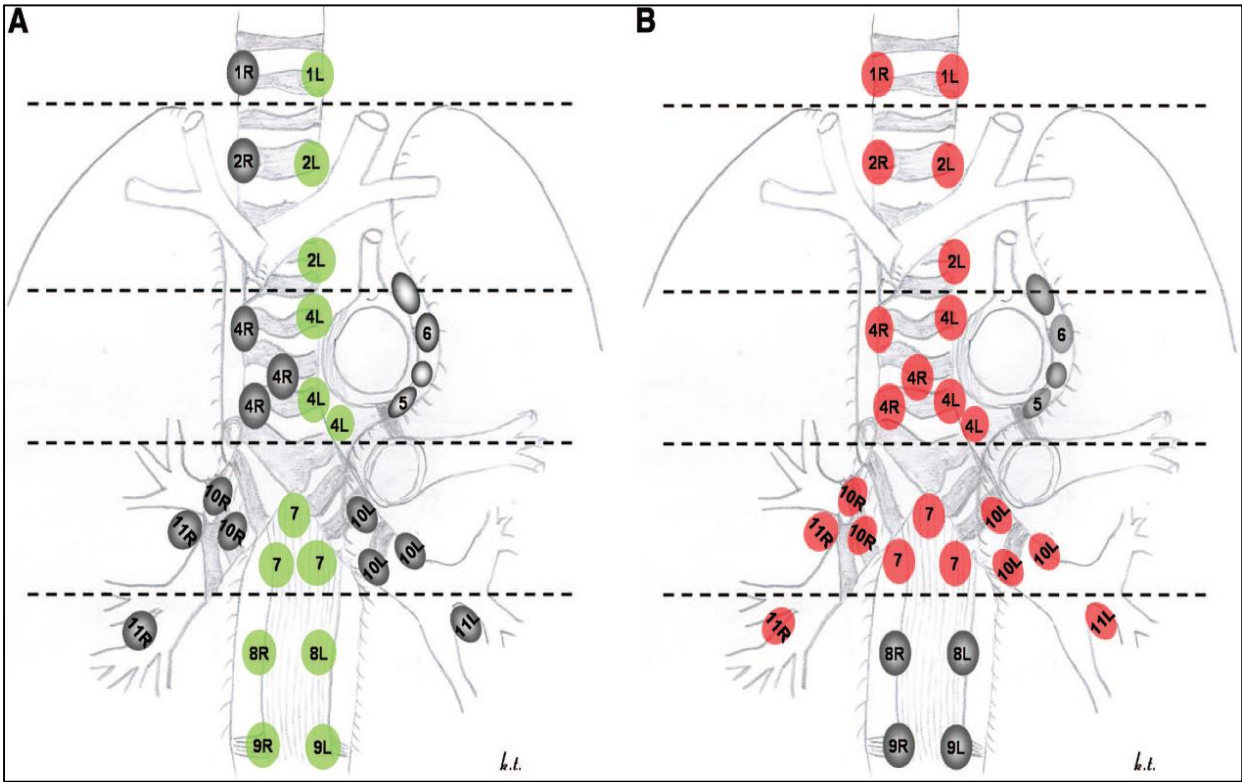

Tabla 2. Rentabilidad diagnóstica en la evaluación mediastínica.

|      | Sensibilidad (%) | Especificidad (%) | Precisión diagnóstica (%) |
|------|------------------|-------------------|---------------------------|
| TBNA | 78               | 99                | —                         |
| EBUS | 79–95            | 99–100            | 97–98                     |
| EUS  | 78–87            | 96–98             | —                         |

TBNA: Aspiración mediante punción transbronquial bajo guía de ecografía transbronquial. EBUS: Ultrasonografía endobronquial. EUS: Ultrasonografía endoscópica.

### *Recomendaciones*

- El EBUS es superior a la estadificación quirúrgica en pacientes con alta sospecha de afectación tumoral mediastínica (Grado 1C).
- La combinación de EBUS/EUS es la prueba diagnóstica no invasiva de mayor rendimiento en la estadificación del CP por su alta sensibilidad, especificidad, baja morbilidad y costo reducido. Esta combinación EBUS/EUS tiene una mayor rentabilidad que la estadificación quirúrgica al permitir la obtención de muestras tanto de lesiones pulmonares como de adenopatías mediastínicas (Grado 1C).
- En pacientes sin metástasis a distancia y con alta sospecha de N2-N3 ya sea por TC o por PET, se recomienda realizar EUS o EBUS o la combinación de ambas (Grado 1B).

#### *3.d.2.d. EBUS radial*

Se trata de un método ultrasonográfico que emite de forma circunferencial a 360° un haz de ultrasonidos de frecuencias muy altas, en torno a los 20 MHz, lo que se traduce en una gran resolución. Permite la obtención de imágenes de gran calidad tanto de la pared traqueal o bronquial como de lesiones en la periferia del parénquima pulmonar. Se puede confirmar el objetivo, mejorando la precisión diagnóstica en las adenopatías mediastínicas respecto a otros métodos como la biopsia transbronquial a ciegas, con o sin fluoroscopia. Los estudios prospectivos con EBUS radial han demostrado una sensibilidad y precisión diagnóstica del 89% y 94% respectivamente. Respecto a la detección de tumores centrales intratorácicos, su precisión es del 75%, cifra superior a la de la TC (51%). Debido a su gran calidad de imagen permite diferenciar entre infiltración tumoral de la pared y compresión extrínseca sin invasión de la misma (30) (tabla 3).

La minisonda radial se introduce a través del broncoscopio y, una vez localizada la lesión, se retira la sonda dejando el catéter y se pueden introducir las herramientas (cepillo, biopsia, catéter aspiración) para tomar las muestras correspondientes. Eberhardt obtiene una precisión diagnóstica del 69% con la EBUS radial, incrementando esta precisión a 88% al combinarla con el broncoscopio por navegación electromagnética. Este diagnóstico es comparable a la biopsia transtorácica de ganglios pulmonares con diámetros de 25mm (31). Por

tanto, en los pacientes con un nódulo pulmonar periférico sospechoso de CP, se recomienda la EBUS radial como procedimiento de elección (14).

Tabla 3. Evaluación EBUS radial versus TC.

|      | Especificidad (%) | Sensibilidad (%) | Precisión diagnóstica (%) |
|------|-------------------|------------------|---------------------------|
| EBUS | 100               | 89               | 94                        |
| TC   | 28                | 75               | 51                        |

TC: Tomografía computarizada. EBUS: Ultrasonografía endobronquial.

### *Recomendación*

-En pacientes con un nódulo pulmonar periférico sospechoso de malignidad no candidatos a cirugía, la EBUS radial se recomienda como modalidad diagnóstica (Grado 1C).

### *3.d.2.e. Broncoscopia por navegación electromagnética*

Es una técnica desarrollada para acceder a los nódulos periféricos u otras lesiones pulmonares en la periferia de difícil acceso con la broncoscopia convencional. Proporciona una orientación en tiempo real mediante una sonda y utilizando un campo magnético generado por una tabla accesorio debajo del paciente. Es necesario programar y asignar los límites anatómicos donde se incluye la lesión. El sensor se carga en un catéter flexible, pasando a través del canal del broncoscopio. Este se acuña en el segmento indicado, prosiguiendo la sonda hasta llegar a la lesión. A continuación se retira la sonda y se introducen las herramientas necesarias para llevar a cabo la extracción de muestras.

Como es una técnica compleja esta muy influenciada por la experiencia del personal, pero también influyen el tamaño y localización de las lesiones estando el diagnóstico de

precisión en el rango de 59-74%. Seijo obtiene una precisión diagnóstica del 67%, con una sensibilidad y especificidad para malignidad de 71% y 100% respectivamente, destacando el hecho de que la presencia del signo del bronquio es el factor más determinante, incrementando el éxito del diagnóstico al 79% (32).

La BNE es un procedimiento seguro, que mejora la precisión diagnóstica de las lesiones periféricas, permitiendo la obtención de muestras no solo de estas lesiones, sino también de ganglios linfáticos mediastínicos. Además de no irradiar, se caracteriza por precisar una curva de aprendizaje siendo complementario de otros procedimientos diagnósticos como la EBUS radial o lineal.

### *Recomendación*

- En pacientes con lesiones pulmonares periféricas de difícil acceso se recomienda la realización de broncoscopia por navegación electromagnética, si el personal de la unidad tienen la experiencia y el equipo disponibles (Grado 1C).

### *3.d.2.f. Toracocentesis y biopsia pleural*

La toracocentesis y la biopsia pleural cerrada son las dos técnicas que aportan más información en el estudio de los derrames pleurales. Sin embargo, en una primera toracocentesis tan solo se consigue un diagnóstico etiológico en torno al 60%, lo que obliga a realizar con frecuencia pruebas complementarias, como son la biopsia pleural o la toracoscopia.

Después de los derrames paraneumónicos, los derrames malignos son los más frecuentes. Cualquier estirpe tumoral puede ser causante de estos derrames, siendo el adenocarcinoma la más frecuente (33).

Entre las causas más frecuentes de derrame pleural maligno destacan los de origen metastásico, principalmente cáncer de pulmón, mama, ovario y linfomas. Dentro del grupo del CP, la estirpe más prevalente es el adenocarcinoma. En la última revisión de la estadificación del CP, el derrame pleural maligno es considerado M1a por su mal pronóstico (29). La toracocentesis es el primer paso para diagnosticar y determinar las características del derrame y ser evaluado según los criterios de Light.

La citología del líquido pleural es el principal método para la detección de células tumorales, con una sensibilidad en el diagnóstico citológico desde un 40% hasta un 87%. Cuando la citología es negativa pero las dudas sobre el derrame pleural persisten, la biopsia pleural está indicada, permitiendo el análisis histológico, los estudios hormonales y de mutaciones específicas.

La ecografía torácica es útil para localizar derrames, así como lesiones en la pared torácica o engrosamientos pleurales. Se incrementa el rendimiento de la toracocentesis y biopsia pleural un 17% en los derrames malignos (35), al permitir obtener mejores muestras. Asimismo, mejora el manejo de procedimientos paliativos como puede ser la colocación de un catéter pleural permanente tipo *PleurX* en comparación con procedimientos sin guía endoscópica.

La biopsia pleural es una herramienta importante en el diagnóstico del derrame pleural maligno. Numerosos autores muestran la alta rentabilidad de esta técnica, obteniendo valores de sensibilidad del 63%, especificidad del 100%, precisión diagnóstica del 73,9%, valor predictivo negativo del 52,8% y valor predictivo positivo del 100%. Estos resultados empeoran ligeramente en el mesotelioma (36).

Al comparar los procedimientos para la obtención del tejido pleural, observamos sensibilidades del 86% para la biopsia pleural cerrada, 94% en la toracoscopia y 100% en la toracotomía (32). La incidencia de siembra pleural es mayor con la toracoscopia que con la biopsia cerrada y si a esto le añadimos el mayor coste de la toracoscopia, concluimos que la biopsia pleural cerrada con control ecográfico es la primera técnica de elección en los pacientes con CPCNP reservándose la toracoscopia para los derrames que no han sido diagnosticados con este procedimiento.

### 3.d.2.g. *Punción aspirativa con aguja fina transtorácica*

Esta técnica se realiza habitualmente mediante control por TC, aunque puede hacerse también mediante control ecográfico. Tiene su mayor utilidad en caso de lesiones periféricas no alcanzables por otro procedimiento, y especialmente cuando hay discordancia entre la probabilidad clínica de cáncer y los resultados de las pruebas de imagen o cuando las preferencias del paciente ante los riesgos de un procedimiento quirúrgico así lo indiquen (38). En un estudio, se estimó que el resultado de la punción aspirativa con aguja fina transtorácica (PAAFT) permitía reducir la realización de cirugía innecesaria desde el 39 hasta el 15% en

casos de nódulo pulmonar indeterminado (39). La sensibilidad global para diagnóstico de malignidad es  $\geq 90\%$ , aunque este porcentaje depende de muchas circunstancias: así, en caso de nódulo  $< 15$  mm, es de 70-82% (1). Los resultados no concluyentes varían ampliamente: entre 1 y 55% (38) y los falsos negativos se estiman en el 20%, de modo que un resultado negativo obliga a realizar otras pruebas para descartar neoplasia.

La complicación más frecuente de la PAAFT es el neumotórax (15%), precisando drenaje el 6,7%. La frecuencia es mayor cuanto más pequeño es el nódulo y más alejado de la pared torácica. La hemorragia importante ocurren en menos del 1%. Estas complicaciones son más frecuentes en caso de pacientes mayores de 60 años, fumadores y con EPOC (40). Está contraindicada en caso de mala función respiratoria, pulmón único, diátesis hemorrágica y presencia de enfisema o bullas extensas en la pared del nódulo.

### 3.d.2.h. *Comités de tumores multidisciplinares*

Dada la multiplicidad de técnicas disponibles para el diagnóstico y estadificación del CP y la estrecha vinculación de estas con la decisión terapéutica final, es aconsejable discutir la indicación de las pruebas a realizar en el seno de comités de tumores multidisciplinares (41), procurando la adecuada coordinación entre especialidades para que el tiempo del proceso diagnóstico sea el mínimo posible.

## Resumen de recomendaciones

| Recomendación                                                                                                                                                                                                                                                                                                                                        | Grado |
|------------------------------------------------------------------------------------------------------------------------------------------------------------------------------------------------------------------------------------------------------------------------------------------------------------------------------------------------------|-------|
| Ante la sospecha de CP con afectación mediastínica por técnicas de imagen y sin evidencia de enfermedad metastásica extratorácica (PET negativa), se recomienda establecer el diagnóstico de CP con el método menos invasivo y más seguro (broncoscopia convencional con PTB, EBUS con PAAF, EUS con PTB, punción transtorácica o mediastinoscopia). | 1C    |
| Ante el hallazgo en TC o PET de una lesión sugestiva de metástasis única, ésta debe confirmarse por citohistología, especialmente en pacientes potencialmente quirúrgicos.                                                                                                                                                                           | 2A    |
| La EBUS es superior a la estadificación quirúrgica en pacientes con alta sospecha de afectación tumoral mediastínica.                                                                                                                                                                                                                                | 1C    |

|                                                                                                                                                                                                                                                                                                                                                                                         |    |
|-----------------------------------------------------------------------------------------------------------------------------------------------------------------------------------------------------------------------------------------------------------------------------------------------------------------------------------------------------------------------------------------|----|
| La combinación de EBUS/EUS es la prueba diagnóstica no invasiva de mayor rendimiento en la estadificación del CP por su alta sensibilidad, especificidad, baja morbilidad y costo reducido. Esta combinación EBUS/EUS tiene una mayor rentabilidad que la estadificación quirúrgica al permitir la obtención de muestras tanto de lesiones pulmonares como de adenopatías mediastínicas | 1C |
| En pacientes sin metástasis a distancia y con alta sospecha de N2-N3 ya sea por TC o por PET, se recomienda realizar EUS o EBUS o la combinación de ambas.                                                                                                                                                                                                                              | 1B |
| En pacientes con un nódulo pulmonar periférico sospechoso de malignidad no candidatos a cirugía, la EBUS radial se recomienda como modalidad diagnóstica.                                                                                                                                                                                                                               | 1C |
| En pacientes con lesiones pulmonares periféricas de difícil acceso se recomienda la realización de broncoscopia por navegación electromagnética, si el personal de la unidad tienen la experiencia y el equipo disponibles.                                                                                                                                                             | 1C |

## Bibliografía

1. Daniels JMA, Sutedja TG. Detection and minimally invasive treatment of early squamous lung cancer. *Ther Adv Med Oncol*. 2013;5:235-48.
2. Tofts RP, Lee PM, Sung AW. Interventional pulmonology approaches in the diagnosis and treatment of early stage non small cell lung cancer. *Transl Lung Cancer Res*. 2013;2:316-31.
3. Kennedy TC, McWilliams A, Edell E, Sutedja T, Downie G, Yung R, et al. Bronchial intraepithelial neoplasia/early central airways lung cancer: ACCP evidence-based clinical practice guidelines (2nd edition). *Chest*. 2007;132(3 Suppl):221S-233S.
4. Czarnecka K, Yasufuku K. Interventional pulmonology: focus on pulmonary diagnostics. *Respirology*. 2013;18:47-60.
5. Herth FJ, Eberhardt R. Endobronchial ultrasound and electromagnetic navigation bronchoscopy in the diagnosis of peripheral lung lesions. *Expert Opin Med Diagn*. 2008;2:461-6.
6. Terán MD, Brock MV. Staging lymph node metastases from lung cancer in the mediastinum. *J Thorac Dis*. 2014;6:230-6.

7. Lee PC, Port JL, Korst RJ, Liss Y, Meherally DN, Altorki NK. Risk factors for occult mediastinal metastases in clinical stage I non-small cell lung cancer. *Ann Thorac Surg.* 2007;84:177-81.
8. Yasufuku K, Nakajima T, Motoori K, Sekine Y, Shibuya K, Hiroshima K, et al. Comparison of endobronchial ultrasound, positron emission tomography, and CT for lymph node staging of lung cancer. *Chest.* 2006;130:710-8.
9. Zaric B, Perin B, Becker HD, Herth FF, Eberhardt R, Jovanovic S, et al. Combination of narrow band imaging (NBI) and autofluorescence imaging (AFI) videobronchoscopy in endoscopic assessment of lung cancer extension. *Med Oncol.* 2012;29:1638-42.
10. Herth FJF, Eberhardt R, Anantham D, Gompelmann D, Zakaria MW, Ernst A. Narrow-band imaging bronchoscopy increases the specificity of bronchoscopic early lung cancer detection. *J Thorac Oncol.* 2009;4:1060-5.
11. Michel RG, Kinasewitz GT, Fung KM, Keddissi JL. Optical coherence tomography as an adjunct to flexible bronchoscopy in the diagnosis of lung cancer: a pilot study. *Chest.* 2010;138:984-8.
12. Herth F, Becker HD, Ernst A. Conventional vs endobronchial ultrasound-guided transbronchial needle aspiration: a randomized trial. *Chest.* 2004;125:322-5.
13. Zhang R, Ying K, Shi L, Zhang L, Zhou L. Combined endobronchial and endoscopic ultrasound-guided fine needle aspiration for mediastinal lymph node staging of lung cancer: a meta-analysis. *Eur J Cancer.* 2013;49:1860-7.
14. Detterbeck FC, Postmus PE, Tanoue LT. The stage classification of lung cancer: Diagnosis and management of lung cancer, 3rd ed: American College of Chest Physicians evidence-based clinical practice guidelines. *Chest.* 2013;143(5 Suppl):e191S-210S.
15. Herth FJF, Rabe KF, Gasparini S, Annema JT. Transbronchial and transoesophageal (ultrasound-guided) needle aspirations for the analysis of mediastinal lesions. *Eur Respir J.* 2006;28:1264-75.
16. Yasufuku K, Pierre A, Darling G, de Perrot M, Waddell T, Johnston M, et al. A prospective controlled trial of endobronchial ultrasound-guided transbronchial needle



aspiration compared with mediastinoscopy for mediastinal lymph node staging of lung cancer. *J Thorac Cardiovasc Surg*. 2011;142:1393-1400.

17. Silvestri GA, Gonzalez AV, Jantz MA, Margolis ML, Gould MK, Tanoue LT, et al. Methods for staging non-small cell lung cancer: Diagnosis and management of lung cancer, 3rd ed: American College of Chest Physicians evidence-based clinical practice guidelines. *Chest*. 2013;143:e211S–e250S.
18. Rintoul RC, Glover MJ, Jackson C, Hughes V, Tournoy KG, Dooms C, et al. Cost effectiveness of endosonography versus surgical staging in potentially resectable lung cancer: a health economics analysis of the ASTER trial from a European perspective. *Thorax*. 2014;69:679–681.
19. Sharples LD, Jackson C, Wheaton E, Griffith G, Annema JT, Dooms C, et al. Clinical effectiveness and costeffectiveness of endobronchial and endoscopic ultrasound relative to surgical staging in potentially resectable lung cancer: results from the ASTER randomised controlled trial. *Health Technol Assess*. 2012;16:1–75.
20. De Leyn P, Dooms C, Kuzdzal J, Lardinois D, Passlick B, Rami-Porta R, et al. Preoperative mediastinal lymph node staging for non-small cell lung cancer: 2014 update of the 2007 ESTS guidelines *Transl Lung Cancer Res*. 2014;3:225–233.
21. Zhang R, Ying K, Shi L, Zhang L, Zhou L. Combined endobronchial and endoscopic ultrasound-guided fine needle aspiration for mediastinal lymph node staging of lung cancer: a meta-analysis. *Eur J Cancer*. 2013;49:1860-1867.
22. Herth FJF, Eberhardt R, Vilman P, Krasnik M, Ernst A. Real-time endobronchial ultrasound guided transbronchial needle aspiration for sampling mediastinal lymph nodes. *Thorax*. 2006;61:795-8.
23. Herth FJF. Nonsurgical staging of the mediastinum: EBUS and EUS. *Semin Respir Crit Care Med*. 2011;32:62-8.
24. Annema JT, van Meerbeeck JP, Rintoul RC, Dooms C, Deschepper E, Dekkers OM, et al. Mediastinoscopy vs endosonography for mediastinal nodal staging of lung cancer: a randomized trial. *JAMA*. 2010;304:2245-52.

25. Eapen GA, Shah AM, Lei X, Jimenez CA, Morice RC, Yarmus L, et al. Complications, consequences, and practice patterns of endobronchial ultrasound-guided transbronchial needle aspiration: Results of the AQUIRE registry. *Chest*. 2013;143:1044-53.
26. Harewood GC, Pascual J, Raimondo M, Woodward T, Johnson M, McComb B, et al. Economic analysis of combined endoscopic and endobronchial ultrasound in the evaluation of patients with suspected non-small cell lung cancer. *Lung Cancer*. 2010;67:366-71.
27. Gu P, Zhao YZ, Jiang LY, Zhang W, Xin Y, Han BH. Endobronchial ultrasound-guided transbronchial needle aspiration for staging of lung cancer: a systematic review and meta-analysis. *Eur J Cancer*. 2009;45:1389-96.
28. Tournoy KG, Annema JT, Krasnik M, Herth FJF, van Meerbeeck JP. Endoscopic and endobronchial ultrasonography according to the proposed lymph node map definition in the seventh edition of the tumor, node, metastasis classification for lung cancer. *J Thorac Oncol*. 2009;4:1576-84.
29. Sánchez de Cos J, Hernández JH, López MFJ, Sánchez SP, Gratacós AR, Porta RR, et al. Normativa SEPAR sobre estadificación del cáncer de pulmón. *Arch Bronconeumol*. 2011;47:454-65.
30. Herth F, Ernst A, Schulz M, Becker H. Endobronchial ultrasound reliably differentiates between airway infiltration and compression by tumor. *Chest*. 2003;123:458-62.
31. Eberhardt R, Anantham D, Ernst A, Feller-Kopman D, Herth F. Multimodality bronchoscopic diagnosis of peripheral lung lesions: a randomized controlled trial. *Am J Respir Crit Care Med*. 2007;176:36-41.
32. Seijo LM, de Torres JP, Lozano MD, Bastarrika G, Alcaide AB, Lacunza MM, et al. Diagnostic yield of electromagnetic navigation bronchoscopy is highly dependent on the presence of a Bronchus sign on CT imaging: results from a prospective study. *Chest*. 2010;138:1316-21.
33. Martín Díaz E, Arnau Obrer A, Martorell Cebollada M, Cantó Armengod A. La toracocentesis en la evaluación del cáncer de pulmón con derrame pleural. *Arch Bronconeumol*. 2002;38:479-84.

34. Porcel JM, Esquerda A, Vives M, Bielsa S. Etiología del derrame pleural: análisis de más de 3.000 toracocentesis consecutivas. *Arch Bronconeumol*. 2014;50:161-5.
35. Botana-Rial M, Leiro-Fernández V, Represas-Represas C, González-Piñeiro A, Tilve-Gómez A, Fernández-Villar A. Thoracic ultrasound-assisted selection for pleural biopsy with Abrams needle. *Respir Care*. 2013;58:1949-54.
36. Jakubec P, Kolek V, Václavík A, Zatloukal J, Losse S, Kučerová L, et al. Closed pleural biopsy in the diagnostics of malignant pleural involvement. *VnitrLek*. 2014;60:423-30.
37. Agarwal PP, Seely JM, Matzinger FR, MacRae RM, Peterson RA, Maziak DE, et al. Pleural mesothelioma: sensitivity and incidence of needle track seeding after image-guided biopsy versus surgical biopsy. *Radiology*. 2006;241:589-94.
38. Gould MK, Donington J, Lynch WR, Mazzone PS, Midthun DE, Naidich DP et al. Evaluation of individuals with pulmonary nodule. When is it lung cancer? 3<sup>a</sup> ed. American College of Chest Physicians. Evidence-based clinical practice guidelines. *Chest*. 2013;145(suppl):93s-120s.
39. Baldwin DR, Eaton T, Kolbe J, Christmas T, Milne D, Mercer J. Management of solitary pulmonary nodule: how do thoracic computed tomography and guided fine needle biopsy influence clinical decisions? *Thorax*. 2002;57:817-822.
40. Wiener RS, Schwartz LM, Woloshin S, Welch HG. Population-based risk for complications after transthoracic needle lung biopsy of a pulmonary nodule: an analysis of discharge records. *Ann Intern Med*. 2011;155:137-142.
41. Reck M, Popat S, Reinmuth N, De Ruysscher D, Kerr KM, Peters S et al. Metastatic non-small cell lung cancer (NSCLC): ESMO clinical practice guidelines for diagnosis, treatment and follow-up. *Ann Onco*. 2014;25 suppl:iii27-iii39.

### **3.e. TÉCNICAS QUIRÚRGICAS: MEDIASTINOSCOPIA, MEDIASTINOTOMÍA, VIDEOTORACOSCOPIA, VAMLA y TEMPLA**

#### **3.e.1. Mediastinoscopia.**

La técnica quirúrgica de la mediastinoscopia fue descrita por primera vez por Harken et al. (1) en 1954, aunque fue Carlens (2) quien en 1959 mejoró esta técnica pronóstica para la estadificación del CP y le dio el nombre de “mediastinoscopia”. Del mapa ganglionar propuesto en la vigente clasificación TNM del cáncer de pulmón (3), la mediastinoscopia permite el acceso a las estaciones ganglionares 2R, 2L, 4R, 4L, 7, 10R y 10L.

La mediastinoscopia se realiza bajo anestesia general, con el paciente en decúbito supino e hiperextensión cervical. Se practica un cervicotomía transversa de unos 4 cm por encima del yugulum esternal, se disecan los diferentes planos en la línea media hasta llegar a la fascia pretraqueal, que se abre, y con el dedo índice se realiza la disección del espacio pre y paratraqueal, para posteriormente introducir el mediastinoscopio y realizar la biopsia de las diferentes estaciones ganglionares.

Las complicaciones de la mediastinoscopia son escasas y la mortalidad es prácticamente nula. En un estudio publicado en 1999 con 2137 pacientes a los que se les había realizado una mediastinoscopia, Hammoud et al. (4) obtuvieron una tasa de complicaciones del 0.6% y una mortalidad del 0.2% asociada fundamentalmente a comorbilidades preoperatorias de los pacientes, con un solo caso de mortalidad atribuible a la técnica (0.05%). La mayoría de las complicaciones son leves, como la infección de la herida o el neumotórax. Sin embargo, también pueden existir complicaciones potencialmente graves como la parálisis recurrencial izquierda, la hemorragia por lesión de grandes vasos que requiera la realización de una toracotomía o una esternotomía de urgencia, la perforación traqueobronquial, la perforación esofágica o la mediastinitis.

Una de las mayores series de pacientes en las que se ha utilizado la mediastinoscopia como método de estadificación es la de Lemaire et al. (5). En este estudio retrospectivo de 1362 pacientes publicado en 2006, los autores obtuvieron una sensibilidad para la mediastinoscopia del 86% y un valor predictivo negativo del 94.5% (tabla 1).

Debido al constante progreso tecnológico, en la práctica totalidad de las instituciones se ha sustituido el mediastinoscopio convencional por un videomediastinoscopio, por lo que la técnica más extendida en la actualidad es la videomediastinoscopia, aunque en muchos lugares se le siga denominando indistintamente mediastinoscopia o videomediastinoscopia. En comparación con la mediastinoscopia convencional, la videomediastinoscopia aporta algunas ventajas. Entre ellas podemos destacar: el hacer más cómoda la técnica para el cirujano, la mejor calidad de la imagen y el permitir que la intervención sea visualizada por varios observadores,

lo que facilita la docencia y el aprendizaje de la misma (6). Sin embargo, a pesar de que en varias revisiones de series quirúrgicas parece que la videomediastinoscopia es un procedimiento más seguro y que permite la obtención de un mayor número de biopsias ganglionares para la estadificación del CP, todavía no existen estudios concluyentes que demuestren la superioridad de la videomediastinoscopia sobre la mediastinoscopia convencional (7,8).

Tabla 1. Rendimiento diagnóstico de las técnicas de estadificación quirúrgica del mediastino.

| Técnica | Autor                 | Año  | N    | S      | E    | VPN   | VPP  |
|---------|-----------------------|------|------|--------|------|-------|------|
| MC      | Lemaire et al. (5)    | 2006 | 1362 | 86%    | 100% | 94.5% | 100% |
| MCCE    | Obiols et al. (16)    | 2012 | 221  | 67%    | 100% | 94%   | 100% |
| MA      | Page et al. (19)      | 1987 | 45   | 86%    | 100% | 89%   | 100% |
| VT      | Massone et al. (21)   | 2003 | 55   | 100%   | 100% | 100%  | 100% |
| VAMLA   | Witte et al. (29)     | 2006 | 144  | 93.75% | 100% | ----- | 100% |
| TEMLA   | Zielinski et al. (30) | 2001 | 698  | 96.2%  | 100% | 98.7% | 100% |

MC: mediastinoscopia; MCCE: mediastinoscopia cervical extendida; MA: mediastinotomía anterior; VT: videotoracoscopia; VAMLA: video-assisted mediastinoscopic lymphadenectomy; TEMLA: transcervical extended mediastinal lymphadenectomy; N: número de pacientes; S: sensibilidad; E: especificidad; VPN: valor predictivo negativo; VPP: valor predictivo positivo.

Hasta hace unos años, la mediastinoscopia era la técnica de elección para la estadificación del mediastino. Sin embargo, la generalización de la PET-TC como método de estadificación en el CP y la reciente incorporación de las punciones ganglionares por EBUS y EUS, han conducido a una reducción de las indicaciones de la mediastinoscopia (6) y a la existencia de algunas diferencias en la recomendaciones de su uso entre las actuales guías de práctica clínica europeas y americanas, debido a que la mediastinoscopia ha dejado de ocupar el primer escalón de sus algoritmos de estadificación mediastínica (9-11).

Los requerimientos mínimos en la estadificación ganglionar mediastínica cuando se realiza una mediastinoscopia es la exploración y biopsia de las estaciones ganglionares 4R, 4L y 7. Además, si se identifican ganglios en las estaciones 2R y 2L, también está indicada la biopsia de los mismos (9,12).

### *Recomendaciones*

-Cuando existe sospecha de afectación ganglionar mediastínica por PET-TC está indicada la confirmación citohistológica, siendo de primera elección la punción por EBUS/EUS (Grado 1A), por ser menos invasiva que la videomediastinoscopia.

-Se realizará videomediastinoscopia cuando los resultados obtenidos con estas técnicas no sean valorables (Grado 1B) o no se disponga de las mismas.

-Cuando no hay sospecha de afectación ganglionar mediastínica por la PET-TC, pero se trata de tumores centrales o con afectación N1, también se recomienda confirmación citohistológica (Grado 1C), siendo de primera elección la punción con EBUS/EUS por ser menos invasiva que la videomediastinoscopia.

-Se realizará videomediastinoscopia cuando los resultados obtenidos con estas técnicas no sean valorables o no se disponga de las mismas (Grado 2B).

### 3.e.1.a. *Mediastinoscopia cervical extendida.*

Los tumores del lóbulo superior izquierdo (LSI) tienen un drenaje linfático alternativo en ganglios de la ventana aorto-pulmonar y para-aórticos (estaciones ganglionares 5 y 6), que no son accesibles por mediastinoscopia convencional, por lo que para la biopsia de los mismos, es preciso complementar la mediastinoscopia con otros métodos quirúrgicos. Sin embargo, sólo se recomienda la biopsia de las estaciones ganglionares 5 y 6 cuando únicamente estas estaciones ganglionares sean positivas por PET-TC, ya que ante la presencia de ganglios con captación patológica en otras estaciones, está indicada la biopsia de los mismos por EBUS/EUS o mediastinoscopia. La confirmación citohistológica del N2 en cualquier otra estación ganglionar hace innecesaria la biopsia de las estaciones 5 y 6, puesto que ello no conlleva cambios pronósticos ni terapéuticos en los pacientes con carcinomas del LSI (9,10).

Un método quirúrgico para la biopsia de las estaciones ganglionares 5 y 6 es la mediastinoscopia cervical extendida. El primer autor en describirla fue Spech (13), quien en 1965 comunicó una modificación de la mediastinoscopia cervical de Carls para el diagnóstico de lesiones mediastínicas prevasculares y que denominó “mediastinoscopia cervical extendida”. Posteriormente Ginsberg et al. (14), en 1987, retomaron la mediastinoscopia cervical extendida con fines pronósticos para la estadificación de los carcinomas de LSI.

La mediastinoscopia cervical extendida se realiza a través de la misma incisión cervical que la mediastinoscopia convencional. La disección se hace con el dedo sobre el cayado aórtico,

entre la arteria innominada y la carótida izquierda, dejando por encima el tronco venoso braquiocefálico izquierdo. López et al. (15) describieron en 1994 una modificación de esta técnica consistente en realizar la disección entre la cara posterior del esternón y la superficie anterior del tronco venoso braquiocefálico izquierdo con resultados similares a las series más amplias publicadas de la literatura (14,16).

Obiols et al. (16) publicaron en 2012 los resultados de un estudio de 221 pacientes con CPCNP a los que se les había practicado una mediastinoscopia cervical extendida. La sensibilidad de la mediastinoscopia cervical extendida obtenida en este estudio fue del 67% y el valor predictivo negativo del 94% (tabla 1).

Sin embargo, la mediastinoscopia cervical extendida es una técnica que se realiza de forma rutinaria en muy pocos centros, ya que técnicamente es más compleja y difícil de aprender que la mediastinoscopia convencional, y conlleva un riesgo mucho mayor de lesión vascular (17).

### **3.e.2. Mediastinotomía.**

Otro método para acceder a las estaciones ganglionares 5 y 6 es la mediastinotomía anterior izquierda. La mediastinotomía fue descrita por primera vez en 1966 por McNeill y Chamberlain (18). Al igual que en la mediastinoscopia, la técnica quirúrgica se realiza bajo anestesia general, con el paciente en decúbito supino y un rodete bajo los hombros. Se realiza una incisión de unos 5 cm sobre el segundo espacio intercostal, se diseca el pectoral mayor hasta llegar al 2º cartílago costal, que se reseca respetando el pericondrio, para posteriormente realizar una pequeña incisión sobre el mismo, acceder al mediastino y realizar la toma de biopsias. La exploración también puede realizarse sin reseca el cartílago o resecando el tercer cartílago costal en lugar del segundo.

A pesar de que es el método quirúrgico más extendido para la biopsia de las estaciones ganglionares 5 y 6, hay pocas publicaciones en la bibliografía que evalúen su utilidad (17). En un estudio de 45 pacientes con CPCNP del LSI, Page et al. (19) obtuvieron una sensibilidad para la mediastinotomía anterior izquierda del 86% y un valor predictivo negativo del 89% (tabla 1).

### 3.e.3. Videotoracoscopia.

Desde sus primeras descripciones hace más de 100 años (20), la toracoscopia ha experimentado un desarrollo espectacular, fundamentalmente en las últimas décadas, debido al progreso constante de la tecnología. Actualmente, el concepto de toracoscopia engloba tres tipos de procedimientos: la pleuroscopia, que se realiza con anestesia local, sedación y habitualmente un solo orificio de entrada, fundamentalmente para el diagnóstico y tratamiento de la patología pleural; la videotoracoscopia, que se realiza con anestesia general, ventilación unipulmonar y requiere más de un orificio de entrada; y la cirugía torácica videoasistida o *video-assisted thoracic surgery* (VATS), que también se realiza con anestesia general y ventilación unipulmonar y en la que además se añade una minitoracotomía de asistencia.

En comparación con la mediastinoscopia, la videotoracoscopia tiene como ventajas el permitir el acceso a las estaciones ganglionares mediastínicas inferiores y el permitir valorar la cavidad pleural y el pulmón. Sin embargo, tiene como inconvenientes que es una técnica unilateral, por lo que sólo permite biopsiar las estaciones ganglionares ipsilaterales; que debe realizarse con ventilación unipulmonar; que es una técnica muy limitada si existen adherencias pleurales firmes; y que precisa de la colocación de un drenaje torácico al finalizar el procedimiento.

En la evaluación del descriptor N, la videotoracoscopia permite el acceso a las estaciones ganglionares 3a, 3p, 4R, 5, 6, 7, 8R, 8L, 9R, 9L, 10R y 10L. Tiene las mismas indicaciones que la mediastinotomía anterior y la mediastinoscopia cervical extendida en los carcinomas del LSI cuando se precisa la toma de biopsia de las estaciones ganglionares 5 y 6 (9,10). Utilizándola como método para la estadificación ganglionar del mediastino, Massone et al. (21) obtuvieron con la videotoracoscopia una sensibilidad y un valor predictivo negativo del 100% en un estudio retrospectivo de 55 pacientes publicado en 2003 (tabla 1).

La pleuroscopia también es un método muy preciso para establecer el diagnóstico de CP en pacientes con derrame pleural sospechoso de malignidad y citología negativa del líquido pleural, ya que permite la realización de una biopsia pleural bajo visión directa y, además, también permite en el mismo acto quirúrgico aplicar una terapia para el control de las posibles recidivas del derrame pleural neoplásico si se añade talco a la cavidad pleural como agente sinfisante (22). Por tanto, en pacientes con sospecha de CP y derrame pleural en los que la citología del líquido pleural es negativa, se recomienda la realización de una biopsia pleural con aguja o por pleuroscopia/videotoracoscopia.



Aparte de las utilidades ya referidas de la toracoscopia en la evaluación de la cavidad pleural y del descriptor N, la videotoracoscopia también es útil en la estadificación preoperatoria del descriptor T (23); en el diagnóstico y tratamiento de nódulos pulmonares periféricos, ya que permite su biopsia y/o resección (23); y en la disminución de las toracotomías exploradoras si se utiliza de forma rutinaria previamente a la realización de la toracotomía, ya que permite la identificación de un pequeño porcentaje de pacientes irresecables no detectados por TC, PET-TC, etc. (24).

### *Recomendaciones*

- En pacientes con sospecha de CP y derrame pleural en los que la citología del líquido pleural es negativa, se recomienda la realización de una biopsia pleural con aguja o por pleuroscopia/videotoracoscopia (Grado 1C).
- En los pacientes con CPCNP del LSI y ganglios de las estaciones 5 y/o 6 positivos por PET-TC está indicada la biopsia quirúrgica de los mismos (por mediastinotomía anterior, mediastinoscopia cervical extendida o videotoracoscopia) cuando el resto de las estaciones ganglionares mediastínicas no se encuentran afectadas (Grado 2B).

### **3.e.4. VAMLA y TEMLA**

El progreso tecnológico que ha experimentado la videomediastinoscopia junto con el desarrollo del *videomediastinoscopio de dos palas separables*, han supuesto una gran influencia en la aparición durante la pasada década de dos nuevas técnicas de exploración del mediastino, como son la *video-assisted mediastinoscopic lymphadenectomy* (VAMLA) y la *transcervical extended mediastinal lymphadenectomy* (TEMLA). Ambas representan versiones muy mejoradas de la mediastinoscopia convencional, ya que su objetivo es aumentar la precisión diagnóstica de la misma mediante la realización de una linfadenectomía mediastínica (resección de los ganglios mediastínicos junto con la grasa que los rodea), por lo que han sido descritas como supermediastinoscopias (25). Sin embargo, ninguna de las dos son técnicas de elección como primer paso para la estadificación del mediastino cuando se sospecha la afectación tumoral del mismo.

La VAMLA o linfadenectomía mediastinoscópica videoasistida es un procedimiento totalmente endoscópico. Fue descrita por primera vez por Hürtgen et al. en 2001 (26). Mediante

la VAMLA se realiza una linfadenectomía de las estaciones ganglionares mediastínicas accesibles por videomediastinoscopia, es decir, las estaciones 2R, 2L, 4R, 4L y 7. La preparación del espacio paratraqueal y la introducción del videomediastinoscopio son similares a una mediastinoscopia convencional, aunque para la realización de la misma es un requisito indispensable la utilización del *videomediastinoscopio de dos palas separables*, ya que permite una mejor exposición y la disección bimanual de las estructuras del mediastino.

La TEMLA o linfadenectomía mediastínica transcervical extendida es un procedimiento principalmente abierto por el que se realiza una linfadenectomía mucho más amplia, desde la región cervical a la paraesofágica. La TEMLA fue desarrollada por el grupo de M. Zielinski y publicada por primera vez en 2005 (27). Mediante esta técnica se realiza una linfadenectomía de todas las estaciones ganglionares con excepción de la estación 9. La intervención se realiza a través de una incisión cervical de unos 5 a 8 cm y se precisa de la elevación del manubrio esternal mediante un retractor especial. Aunque la mayor parte del procedimiento es abierto, para la resección de los ganglios de las estaciones 7 y 8 es necesario utilizar el videomediastinoscopio, y para la resección de los ganglios de las estaciones 5 y 6 se precisa la utilización de un toracoscopio introducido a través de la incisión cervical (28).

Tanto la VAMLA como la TEMLA tienen un rendimiento diagnóstico mayor que la mediastinoscopia convencional. En un estudio publicado en 2006 con 144 pacientes a los que se les realizó una VAMLA, Witte et al. (29) obtuvieron una sensibilidad del 93.75%, con un 0.9% de falsos negativos. Del mismo modo, en otro estudio publicado en 2011 con 698 pacientes a los que se les había realizado una TEMLA, Zielinski et al. (30) obtuvieron una sensibilidad del 96.2% y un VPN del 98.7% (tabla 9). Por el contrario, la morbilidad publicada en ambos estudios también fue mayor que con la mediastinoscopia convencional (29,30).

Algunos autores recomiendan la combinación de VAMLA o TEMLA junto con la realización de una lobectomía por VATS, para de este modo conseguir una mayor precisión en la estadificación del mediastino sin perder la mínima invasión que supone el tratamiento quirúrgico del CP mediante la lobectomía VATS (28).

Sin embargo, los resultados publicados sobre VAMLA y TEMLA son escasos, ya que solamente se utilizan en muy pocos centros y con amplia experiencia. Además, un reciente meta-análisis muestra que VAMLA y TEMLA conllevan una mayor morbilidad, con una precisión diagnóstica similar, en comparación otros métodos de estadificación mucho menos

agresivos como el EBUS (31). Por tanto, actualmente no se recomienda su uso rutinario como métodos de estadificación quirúrgica del mediastino (9).

En relación con el tratamiento quirúrgico tras finalizar la estadificación, se considera que en los casos no complicados, el tiempo transcurrido entre la primera consulta con un especialista en neumología y la resección quirúrgica ha de ser de 8 semanas como máximo. En estos casos, la demora en lista de espera quirúrgica no debería sobrepasar las 4 semanas (32).

Una vez revisados los diferentes métodos de estadificación ganglionar del mediastino, en la figura 1 se expone el algoritmo actuación recomendado.

Figura 1. Algoritmo de estadificación ganglionar del mediastino.

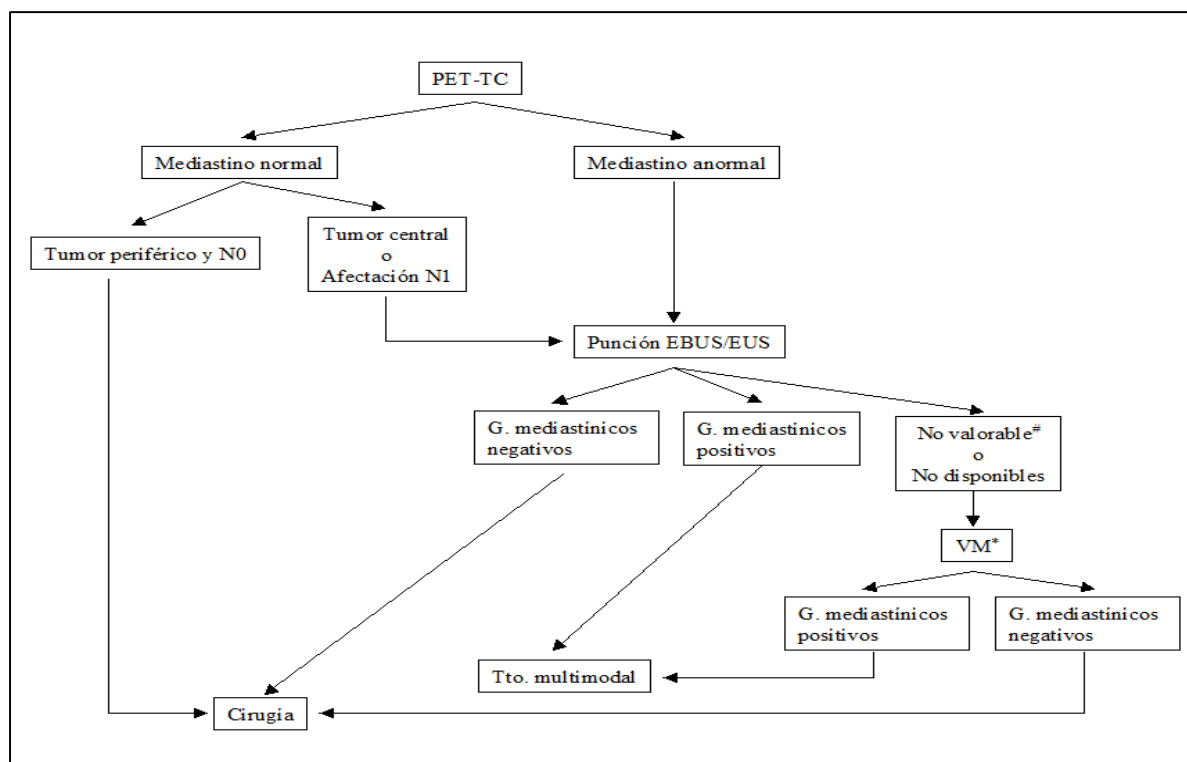

G: ganglios. Tto.: tratamiento.

VM\*: videomediastinoscopia. Aquí también se incluye la realización de otras técnicas quirúrgicas como la mediastinoscopia cervical extendida, la mediastinotomía anterior o la videotoracoscopia cuando los ganglios sospechosos no son accesibles por videomediastinoscopia, como ocurre con las estaciones ganglionares 5 y 6 en los carcinomas del lóbulo superior izquierdo.

EBUS/EUS no valorable<sup>#</sup>: Se considera que una muestra de EBUS no es valorable cuando no hay linfocitos y únicamente contiene células sanguíneas, bronquiales o fibrosis sin poderse confirmar que se trata de una punción ganglionar. En el caso de aparecer células tumorales sin linfocitos se considera muestra adecuada. Aunque no se pueda demostrar su origen ganglionar por anatomía patológica, se presupone por la confirmación ecográfica de la punción

## Resumen de recomendaciones

| Recomendación                                                                                                                                                                                                                                                                                                                   | Grado |
|---------------------------------------------------------------------------------------------------------------------------------------------------------------------------------------------------------------------------------------------------------------------------------------------------------------------------------|-------|
| Cuando existe sospecha de afectación ganglionar mediastínica por PET-TC está indicada la confirmación citohistológica, siendo de primera elección la punción por EBUS/EUS, por ser menos invasiva que la videomediastinoscopia.                                                                                                 | 1A    |
| Se realizará videomediastinoscopia cuando los resultados obtenidos con estas técnicas no sean valorables o no se disponga de las mismas.                                                                                                                                                                                        | 1B    |
| Cuando no hay sospecha de afectación ganglionar mediastínica por la PET-TC, pero se trata de tumores centrales o con afectación N1, también se recomienda confirmación citohistológica, siendo de primera elección la punción con EBUS/EUS por ser menos invasiva que la videomediastinoscopia.                                 | 1C    |
| Se realizará videomediastinoscopia cuando los resultados obtenidos con estas técnicas no sean valorables o no se disponga de las mismas.                                                                                                                                                                                        | 2B    |
| En pacientes con sospecha de CP y derrame pleural en los que la citología del líquido pleural es negativa, se recomienda la realización de una biopsia pleural con aguja o por pleuroscopia/videotoracoscopia.                                                                                                                  | 1C    |
| En los pacientes con CPCNP del LSI y ganglios de las estaciones 5 y/o 6 positivos por PET-TC está indicada la biopsia quirúrgica de los mismos (por mediastinotomía anterior, mediastinoscopia cervical extendida o videotoracoscopia) cuando el resto de las estaciones ganglionares mediastínicas no se encuentran afectadas. | 2B    |

## Bibliografía

1. Harken DE, Black H, Clauss R, Farrand RE. A simple cervicomedastinal exploration for tissue diagnosis of intrathoracic disease; with comments on the recognition of inoperable carcinoma of the lung. N Engl J Med. 1954;251:1041-4.
2. Carlens E. Mediastinoscopy: a method for inspection and tissue biopsy in the superior mediastinum. Dis Chest. 1959;36:343-52.
3. Rusch VW, Asamura H, Watanabe H, Giroux DJ, Rami-Porta R, Goldstraw P. The IASLC lung cancer staging project: a proposal for a new international lymph node map in the forthcoming seventh edition of the TNM classification for lung cancer. J Thorac Oncol. 2009;4:568-77.

4. Hammoud ZT, Anderson RC, Meyers BF, Guthrie TJ, Roper CL, Cooper JD, et al. The current role of mediastinoscopy in the evaluation of thoracic disease. *J Thorac Cardiovasc Surg.* 1999;118:894-9.
5. Lemaire A, Nikolic I, Petersen T, Haney JC, Toloza EM, Harpole DH Jr., et al. Nine-year single center experience with cervical mediastinoscopy: complications and false negative rate. *Ann Thorac Surg.* 2006;82:1185-9;discussion 1189-90.
6. Lerut T, De Leyn P, Coosemans W, Decaluwe H, Decker G, Nafteux P, et al. Cervical videomediastinoscopy. *Thorac Surg Clin.* 2010;20:195-206.
7. Zakkar M, Tan C, Hunt I. Is video mediastinoscopy a safer and more effective procedure than conventional mediastinoscopy? *Interact Cardiovasc Thorac Surg.* 2012;14:81-4.
8. Adebibe M, Jarral OA, Shipolini AR, McCormack DJ. Does video-assisted mediastinoscopy have a better lymph node yield and safety profile than conventional mediastinoscopy? *Interact Cardiovasc Thorac Surg.* 2012;14:316-9.
9. De Leyn P, Doooms C, Kuzdzal J, Lardinois D, Passlick B, Rami-Porta R, et al. Revised ESTS guidelines for preoperative mediastinal lymph node staging for non-small-cell lung cancer. *Eur J Cardiothorac Surg.* 2014;45:787-98.
10. Silvestri GA, Gonzalez AV, Jantz MA, Margolis ML, Gould MK, Tanoue LT, et al. Methods for staging non-small cell lung cancer: Diagnosis and management of lung cancer, 3rd ed: American College of Chest Physicians evidence-based clinical practice guidelines. *Chest.* 2013;143(5 Suppl):e211S-50S.
11. Sánchez de Cos J, Hernández Hernández J, Jiménez López MF, Padrones Sánchez S, Rosell Gratacós A, Rami Porta R. Normativa SEPAR sobre estadificación del cáncer de pulmón. *Arch Bronconeumol.* 2011;47:454-65.
12. Rami-Porta R, Call S. Invasive staging of mediastinal lymph nodes: mediastinoscopy and remediastinoscopy. *Thorac Surg Clin.* 2012;22:177-89.
13. Specht G. Erweiterte Mediastinoskopie. *Thoraxchir Vask Chir.* 1965;13:401-7.

14. Ginsberg RJ, Rice TW, Goldberg M, Waters PF, Schmocker BJ. Extended cervical mediastinoscopy. A single staging procedure for bronchogenic carcinoma of the left upper lobe. *J Thorac Cardiovasc Surg*. 1987;94:673-8.
15. Lopez L, Varela A, Freixinet J, Quevedo S, Lopez Pujol J, Rodriguez de Castro F, et al. Extended cervical mediastinoscopy: prospective study of fifty cases. *Ann Thorac Surg*. 1994;57:555-7;discussion 557-8.
16. Obiols C, Call S, Rami-Porta R, Iglesias M, Saumench R, Serra-Mitjans M, et al. Extended cervical mediastinoscopy: mature results of a clinical protocol for staging bronchogenic carcinoma of the left lung. *Eur J Cardiothorac Surg*. 2012;4:1043-6.
17. Catarino PA, Goldstraw P. The future in diagnosis and staging of lung cancer: surgical techniques. *Respiration*. 2006;73:717-32.
18. McNeill TM, Chamberlain JM. Diagnostic anterior mediastinotomy. *Ann Thorac Surg*. 1966;2:532-9.
19. Page A, Nakhle G, Mercier C, Verdant A, Page P, Dontigny L, et al. Surgical treatment of bronchogenic carcinoma: the importance of staging in evaluating late survival. *Can J Surg*. 1987;30:96-9.
20. Moisiuc FV, Colt HG. Thoracoscopy: origins revisited. *Respiration*. 2007;74:344-55.
21. Massone PP, Lequaglie C, Magnani B, Ferro F, Cataldo I. The real impact and usefulness of video-assisted thoracoscopic surgery in the diagnosis and therapy of clinical lymphadenopathies of the mediastinum. *Ann Surg Oncol*. 2003;10:1197-202.
22. Villena Garrido V, Ferrer Sancho J, Hernández Blasco L, de Pablo Gafas A, Pérez Rodríguez E, Rodríguez Panadero F, et al. Diagnóstico y tratamiento del derrame pleural. *Arch Bronconeumol*. 2006;42:349-72.
23. Sebastián-Quetglás F, Molins L, Baldó X, Buitrago J, Vidal G. Clinical value of video-assisted thoracoscopy for preoperative staging of non-small cell lung cancer. A prospective study of 105 patients. *Lung Cancer*. 2003;42:297-301.
24. Jiménez Merchán R, Congregado Loscertales M, Gallardo Valera G, Trivino Ramírez A, Ayarra Jarne J, Loscertales J. Videotoracosopia exploradora y videopericardioscopia en la

estadificación definitiva y valoración de la resecabilidad del cáncer de pulmón. *Arch Bronconeumol*. 2009;45:435-41.

25. Rami-Porta R. Supermediastinoscopies: A step forward in lung cancer staging. *J Thorac Oncol*. 2007;2:355-356.

26. Hurtgen M, Friedel G, Toomes H, Fritz P. Radical video-assisted mediastinoscopic lymphadenectomy (VAMLA)-technique and first results. *Eur J Cardiothorac Surg*. 2002;21:348-51.

27. Kuzdzal J, Zielinski M, Papla B, Szlubowski A, Hauer L, Nabialek T, et al. Transcervical extended mediastinal lymphadenectomy--the new operative technique and early results in lung cancer staging. *Eur J Cardiothorac Surg*. 2005;27:384-90;discussion 390.

28. Zielinski M. Video-assisted mediastinoscopic lymphadenectomy and transcervical extended mediastinal lymphadenectomy. *Thorac Surg Clin*. 2012;22:219-25.

29. Witte B, Wolf M, Huertgen M, Toomes H. Video-assisted mediastinoscopic surgery: clinical feasibility and accuracy of mediastinal lymph node staging. *Ann Thorac Surg*. 2006;82:1821-7.

30. Zielinski M, Hauer L, Hauer J, Pankowski J, Szlubowski A, Nabialek T. Transcervical Extended Mediastinal Lymphadenectomy (TEMLA) for staging of non-small-cell lung cancer (NSCLC). *Pneumonol Alergol Pol*. 2011;79:196-206.

31. Kuzdzal J, Warmus J, Grochowski Z. Optimal mediastinal staging in non-small cell lung cancer: what is the role of TEMLA and VAMLA? *Lung Cancer*. 2014;86:1-4.

32. BTS recommendations to respiratory physicians for organising the care of patients with lung cancer. The Lung Cancer Working Party of the British Thoracic Society Standards of Care Committee. *Thorax*. 1998;53(Suppl 1):S1-8.

## 4. TRATAMIENTO

### **4.a. CIRUGÍA. RESECCIÓN COMPLETA E INCOMPLETA. LINFADENECTOMÍA. TÉCNICA QUIRÚRGICA: CIRUGÍA ABIERTA, VATS. TIPOS RESECCIÓN: RESECCIÓN EN CUÑA, RESECCIONES ANATÓMICAS (SEGMENTECTOMÍA, LOBECTOMÍA, NEUMONECTOMÍA), RESECCIONES BROCOANGIOPLASTICAS Y RESECCIONES EXTENDIDAS**

La cirugía ofrece la mejor posibilidad de curación para pacientes operables con CPCNP en estadios I y II. Aunque no hay estudios controlados, existen datos consistentes, derivados de estudios retrospectivos, base de datos y registros, que demuestran que la cirugía en estos estadios procura mejores resultados en supervivencia que el curso natural de la enfermedad o si se trata con cualquier otra alternativa terapéutica. Así, la supervivencia a cinco años tras cirugía radical es del 54-80%, 38-65% y 30-50% en pacientes con estadio Ia, Ib y II, respectivamente (1,2).

El tratamiento quirúrgico solo no es una opción terapéutica válida en pacientes con CPCNP en estadio IIIA por N2. No obstante, dentro de un esquema terapéutico multidisciplinar, puede ser útil en pacientes bien seleccionados. A pesar de los múltiples ensayos clínicos que se han llevado a cabo en este estadio, aún no existe un esquema terapéutico óptimo y con suficiente evidencia científica. Sí parece claro que el beneficio de la cirugía solo se produce tras resecciones completas del tumor y de su componente mediastínico. Desde el punto de vista quirúrgico y práctico, la afectación mediastínica puede clasificarse como (a) oculta –encontrada en la toracotomía, a pesar de un estudio estadificador preoperatorio completo-, (b) discreta o potencialmente resecable –estación única, adenopatías únicas o individualizables menores de 3 cm y separadas del tumor, y (c) extensa o irresecable –masas adenopáticas voluminosas, adenopatías que no pueden individualizarse, sin solución de continuidad con el tumor o que engloban los vasos mediastínicos o la vía aérea-. En pacientes con enfermedad oculta, la resección del tumor y de las adenopatías ofrece mejor supervivencia que cuando la afectación mediastínica se detecta antes de la resección, si la resección pulmonar y mediastínica puede ser completa (3,4). Además, el pronóstico en este grupo de pacientes está influenciado por el número de adenopatías afectas y por el porcentaje de afectas entre las resecadas (5). En pacientes con afectación mediastínica extensa, ni la terapia adyuvante incrementa la



reseccabilidad ni la resección, como tratamiento inicial, se asocia a beneficio en la supervivencia (6). En pacientes con afectación mediastínica discreta, la cirugía, como primer brazo de tratamiento no ha demostrado superioridad en supervivencia frente a otros tratamientos en los ensayos clínicos controlados. Sin embargo, tras terapia de inducción ofrece beneficio en cuanto a supervivencia a largo plazo, respecto a otras alternativas terapéuticas (7,8). La ganancia en supervivencia con la cirugía precedida por terapia de inducción es mayor cuando se evita la neumonectomía (9,10), sobre todo derecha (11), dada la alta mortalidad postoperatoria que acarrea; no obstante, en centros con amplia experiencia en este tipo de tratamientos la mortalidad tras neumonectomía es casi similar a la de esta técnica no precedida por inducción (12). La supervivencia es también significativamente mayor cuando la inducción erradica la afectación mediastínica (9).

En pacientes en estadio IIIA por T3N1 o T4N0-1, la cirugía, dentro de un esquema terapéutico multidisciplinar, ha demostrado buenos resultados en supervivencia. La cirugía en estadio T3N1 por afectación de pared torácica ofrece una supervivencia de aproximadamente el 20% a 5 años, siempre que la cirugía sea completa. En pacientes con afectación exclusiva de pleura parietal, no existen estudios controlados para determinar si la resección en bloque de la pared es superior a la pleurectomía. No obstante, la mayoría de las series muestran mejores resultados con la resección parietal completa en bloque (13). En pacientes con tumores del vértice pulmonar, la cirugía –parieto-lobectomía en bloque-, precedida de quimio-radioterapia ofrece la mejor supervivencia, con cifras próximas al 55% a 5 años (14,15).

Determinados casos cuidadosamente seleccionados de tumores T4N0-1 pueden beneficiarse de la resección quirúrgica, dentro de un esquema multidisciplinario. Las resecciones extendidas por afectación T4 se tratan separadamente dentro de este mismo apartado. Los pacientes con T4 por nódulos tumorales ipsilaterales en diferentes lóbulos tratados con cirugía presentan mejor supervivencia que los tratados sin resección, con cifras cercanas al 15% a 5 años (15).

La cirugía, dentro de un esquema terapéutico multidisciplinar, puede ofrecer buenos resultados, con supervivencias del 15% a 25% a 5 años, en pacientes bien seleccionados con M1 cerebral y suprarrenal, si ambos componentes –el pulmonar y el metastásico- son completamente erradicados. La afectación mediastínica y los tumores locorregionalmente avanzados suponen un mal pronóstico para los pacientes con metástasis cerebral (16). Así

mismo, la afectación mediastínica descubierta post-resección es un factor ominoso en pacientes con metástasis suprarrenales (17).

### *Recomendaciones*

- Se recomienda la cirugía radical en los pacientes operables con CPCNP en estadios I y II (Grado 1B).
- En pacientes con enfermedad mediastínica oculta, la resección del tumor y de las adenopatías está indicada, si la resección pulmonar y mediastínica puede ser completa (Grado 2C).
- En los pacientes con CPCNP en estadio IIIA con afectación N2 discreta identificada preoperatoriamente la cirugía, como primer brazo de tratamiento no está indicada fuera de ensayos clínicos (Grado 1C).
- En los pacientes con CPCNP en estadio IIIA con afectación N2 discreta identificada preoperatoriamente se puede proponer terapia de inducción, evaluación posterior y cirugía radical si toda la enfermedad intratorácica es resecable (Grado 1A).
- Tras terapia de inducción se evitará la neumonectomía, sobre todo derecha, salvo en centros con amplia experiencia (Grado 2C).
- Se recomienda el tratamiento quirúrgico en pacientes con CPCNP potencialmente resecables en estadio IIIA por T3N1 dentro de un esquema terapéutico multidisciplinar (Grado 1B).
- En pacientes con CPCNP con afectación de pleura parietal se recomienda la resección parietal en bloque (Grado 2C).
- En tumores de vértice pulmonar se recomienda que la cirugía completa, mediante parieto-lobectomía- sea precedida por terapia de inducción (Grado 2B).
- Se recomienda la resección quirúrgica, dentro de un esquema terapéutico multidisciplinar, en pacientes con CPCNP T4 por nódulos tumorales ipsilaterales en diferentes lóbulos (Grado 1B).
- La cirugía, dentro de un esquema multidisciplinar, puede ofrecerse a pacientes con CPCNP potencialmente resecables, sin afectación mediastínica y con metástasis suprarrenal o cerebral erradicable (Grado 1C).

#### **4.a.1. Resección completa e incompleta**

Según la IASLC (18) una resección tumoral completa es aquella que cumple los siguientes criterios:

- Márgenes de resección libres demostrados microscópicamente. Estos márgenes deben incluir los muñones de arterias, venas y bronquios, los tejidos blandos peribronquiales y cualquier margen periférico cercano al tumor o al resto del tejido resecado.
- Disección ganglionar sistemática en su forma más amplia, o bien disección ganglionar sistemática lóbulo-específica (tal como se describe más arriba). Las muestras deben incluir, al menos, seis ganglios, tres de las estaciones intrapulmonares o hiliares y tres de las mediastínicas, una de las cuales debe ser la subcarínica.
- No debe haber extensión extracapsular del tumor en los ganglios resecados de manera aislada o en los localizados en el margen del principal tumor pulmonar.
- El ganglio mediastínico extirpado más alto debe ser negativo.

Si bien existen datos suficientes para desaconsejar el tratamiento quirúrgico en pacientes con CPCNP cuando se prevé que la resección va a ser incompleta, no hay conclusiones definitivas respecto a si existe algún beneficio en llevar a cabo una resección incompleta cuando se comprueba la irresecabilidad durante la toracotomía. Si bien la mayoría de los estudios encuentran mejor supervivencia cuando se reseca incompletamente el tumor que cuando no se hace, pocos analizan estadísticamente los resultados o diferencian entre residuo tumoral macroscópico (R2) o microscópico (R1). La serie más extensa publicada es la del Grupo Cooperativo de Carcinoma Broncogénico de SEPAR, y demuestra que la resección incompleta aporta mejor supervivencia que la no resección; no obstante en el estudio no se distingue entre residuo micro o macroscópico y más de la tercera parte de las resecciones incompletas lo fueron por residuo adenopático (19). En la única serie que distingue entre residuo microscópico y macroscópico, la supervivencia fue superior a la toracotomía exploradora en los R1, pero no en los R2 (20). En un reciente análisis de evidencia científica sobre este tema se concluye que puede haber una ventaja en supervivencia en las resecciones incompletas por CPCNP cuando el residuo es microscópico o adenopático, pero no cuando es macroscópico (21).

#### *Recomendación*

-La cirugía en el CPCNP solo está indicada cuando la resección puede ser completa o cuando el residuo no resecado sea microscópico o adenopático, pero no macroscópico (Grado 1C).

#### 4.a.2. Linfadenectomía

La extensión óptima de la resección ganglionar en la cirugía del CPCNP está aún por determinar. Las definiciones sobre los métodos de evaluación ganglionar durante la cirugía pueden consultarse en la *Normativa SEPAR sobre estadificación del cáncer de pulmón* (22). Un meta-análisis sobre este tema concluyó que la disección ganglionar sistemática frente al muestreo ganglionar se asociaba a una mejora pequeña-moderada de la supervivencia (23). Sin embargo, esta mejoría puede deberse simplemente a una estadificación más precisa (24). El ensayo clínico del *American College of Surgery Oncology Group* (ACOSOG Z0030) diseñado para determinar el efecto de la linfadenectomía sobre la supervivencia, en pacientes operados por CPCNP N0-1, no demostró diferencias de morbilidad, supervivencia ni de recurrencia loco-regional entre la disección ganglionar sistemática y el muestreo ganglionar (25). No obstante, en estadio II, la disección ganglionar sistemática ha demostrado un mayor intervalo libre de enfermedad y un mejor control local del tumor que el muestreo ganglionar (15). Tanto la *European Society of Thoracic Surgeons* (ESTS) (26) como la *British Thoracic Society* (BTS) (27) proponen la disección ganglionar sistemática para asegurar la resección completa y obtener una estadificación más precisa.

#### *Recomendación*

- Se recomienda la disección ganglionar sistemática para mejorar la precisión de la estadificación y, eventualmente, aumentar el intervalo libre de enfermedad y la supervivencia (Grado 2C).

#### 4.a.3. Técnica quirúrgica: Cirugía abierta y VATS

Existen datos consistentes, derivados de estudios controlados, de cohortes, casos-controles, meta-análisis, revisiones sistemáticas y series de casos amplias, que avalan que la cirugía toracoscópica en el tratamiento del CPCNP disminuye la mortalidad, la morbilidad y la estancia hospitalaria, sin comprometer el intervalo libre de enfermedad ni la supervivencia (28-34).

### *Recomendación*

- La resección pulmonar anatómica mediante toracosopia, cuando sea factible, es preferible a la abierta en pacientes con CPCNP (Grado 2B).

#### **4.a.4. Tipo de resección**

##### *4.a.4.a. Resecciones sublobares*

La resección pulmonar sublobar consiste en la exéresis de uno o más segmentos anatómicos (segmentectomía) o de una resección no anatómica, transegmentaria o en cuña. La justificación para la realización de resecciones sublobares obedece, generalmente, a dos razones: pacientes en los que se presupone que no toleran una lobectomía, o tumores que por sus características no precisarían una lobectomía. La eficacia de las resecciones sublobares no está definitivamente determinada. La interpretación de los resultados de estudios no controlados sobre este tema se ve dificultada por los factores confundentes que intervienen: frecuente agrupación de segmentectomías con resecciones en cuña, de tumores con distinto pronóstico, comorbilidades que determinan elección sesgada del procedimiento, etc. El primer estudio controlado mostró que en el estadio 1A, la recidiva local era tres veces más frecuente y la mortalidad un 30% mayor en la resección sublobar que en la lobectomía, sobre todo en tumores no escamosos (35). Sin embargo, varios estudios prospectivos no encuentran diferencias respecto a supervivencia y recurrencia local entre estas dos técnicas en tumores N0 de hasta 2 cm de diámetro (36,37). La segmentectomía anatómica se ofrece, cada vez más frecuentemente, como alternativa a la lobectomía en el CPCNP en estadio I. Los resultados obtenidos con segmentectomías anatómicas en instituciones únicas no difieren de los de series históricas y actuales tras lobectomía, si bien un reciente meta-análisis sugiere que la equivalencia solo es

válida en lesiones de hasta 2 cm de diámetro (38). Existen en la actualidad varios ensayos clínicos que pretenden dar respuesta a esta disyuntiva (39).

#### *Recomendación*

- En pacientes de alto riesgo de mortalidad operatoria con CPCNP en estadio I y tumores de hasta 2 cm, la segmentectomía anatómica o la resección en cuña, con márgenes negativos, son preferibles a la lobectomía (Grado 2C).

#### *4.a.4.b. Lobectomía*

La lobectomía es la técnica de elección para la resección de CPCNP en estadios tempranos, al permitir una resección oncológica del tumor y de su componente linfático. A la espera de los ensayos clínicos en curso que comparan los resultados en supervivencia de la lobectomía con las resecciones sublobares, y los comentarios del parágrafo anterior, la lobectomía sigue siendo la indicación estándar en pacientes que puedan tolerarla funcionalmente y cuyo tumor pueda ser resecado completamente con esta técnica (40-43).

#### *Recomendación*

- La lobectomía es la técnica de elección en el CPCNP en estadio I y II en pacientes que puedan tolerarla funcionalmente (Grado 1B).

#### *4.a.4.c. Neumonectomía*

La neumonectomía está indicada en tumores centrales o que se extienden a través de las cisuras y que no pueden ser resecados mediante otras técnicas menos cruentas (44). La neumonectomía se asocia a cambios anatómicos torácicos importantes, disminución significativa de la función pulmonar y a numerosas complicaciones potenciales que afectan al sistema respiratorio y cardiovascular, así como al espacio pleural. La mortalidad operatoria actual se aproxima al 8 % (45-49). La neumonectomía derecha se asocia a una mortalidad más alta que la izquierda, 10 a 12 % frente a 1 al 3,5 %, respectivamente (50). Mientras que algunos

autores encuentran que la edad es un factor de riesgo independiente para la mortalidad (51), otros no lo encuentran (52). La supervivencia a 10 años tras neumonectomía por CPCNP oscila entre el 67 y el 85% (53). La resección mediante técnicas bronco-angioplásticas, cuando es factible, frente a la neumonectomía ofrece resultados oncológicos similares, con una mayor preservación de la función pulmonar y con menos complicaciones y mortalidad (54,55).

#### 4.a.4.d. *Resecciones broncoangioplásticas*

Si bien no existe ningún estudio controlado que compare la neumonectomía con las resecciones lobares bronco-angioplásticas que la evitan, existe suficiente evidencia científica proveniente de meta-análisis y de estudios de cohortes amplios para confirmar que las resecciones broncoangioplásticas mejoran la supervivencia, reducen la pérdida de función pulmonar, reducen la mortalidad operatoria y, en la mayoría de los casos, no incrementan la tasa de recurrencia local (56). Existen pocos datos que comparen estas técnicas en pacientes tratados con quimioterapia de inducción. No obstante, en centros con experiencia, no parece que se incremente significativamente la morbi-mortalidad (57).

#### *Recomendación*

- Se efectuará neumonectomía solo cuando el CPCNP no pueda ser resecado de forma completa mediante lobectomía, incluyendo técnicas broncoangioplásticas (Grado 1B).

#### 4.a.4.e. *Resecciones extendidas*

El CPCNP con invasión de estructuras adyacentes (T4) se consideraba en las ediciones anteriores de la Clasificación TNM como estadio IIIB y, por tanto, irresecable. Con la mejora en el diagnóstico por imagen, en las técnicas quirúrgicas y en los cuidados perioperatorios, pacientes cuidadosamente seleccionados y en centros con experiencia que presentan afectación de carina (58), vena cava superior, aurícula izquierda, arteria pulmonar intrapericárdica, aorta, esófago y cuerpos vertebrales (59-62) pueden beneficiarse de la cirugía, en el contexto de un tratamiento multidisciplinar, con supervivencias de hasta el 50% a 5 años (60). Esto ha hecho que en la 7ª edición de la Clasificación TNM estos casos se reclasifiquen como estadio IIIA.

Los mejores resultados se obtienen en pacientes N0-1 y el tratamiento de inducción puede incrementar la supervivencia (62).

### Recomendación

- En pacientes con CPCNP T4N0-1, cuidadosamente seleccionados, está indicada la cirugía, en el contexto de un tratamiento multidisciplinar (Grado 2B).

### Resumen de recomendaciones

| Recomendación                                                                                                                                                                                                                          | Grado |
|----------------------------------------------------------------------------------------------------------------------------------------------------------------------------------------------------------------------------------------|-------|
| Se recomienda la cirugía radical en los pacientes operables con CPCNP en estadios I y II.                                                                                                                                              | 1B    |
| En pacientes con enfermedad mediastínica oculta, la resección del tumor y de las adenopatías está indicada, si la resección pulmonar y mediastínica puede ser completa.                                                                | 2C    |
| En los pacientes con CPCNP en estadio IIIA con afectación N2 discreta identificada preoperatoriamente, la cirugía como primer brazo de tratamiento no está indicada fuera de ensayos clínicos.                                         | 1C    |
| En los pacientes con CPCNP en estadio IIIA con afectación N2 discreta identificada preoperatoriamente se puede proponer terapia de inducción, evaluación posterior y cirugía radical si toda la enfermedad intratorácica es resecable. | 1A    |
| Tras terapia de inducción se evitará la neumonectomía, sobre todo derecha, salvo en centros con amplia experiencia.                                                                                                                    | 2C    |
| Se recomienda el tratamiento quirúrgico en pacientes con CPCNP potencialmente resecables en estadio IIIA por T3N1 dentro de un esquema terapéutico multidisciplinar.                                                                   | 1B    |
| En pacientes con CPCNP con afectación de pleura parietal se recomienda la resección parietal en bloque.                                                                                                                                | 2C    |
| En tumores de vértice pulmonar se recomienda que la cirugía completa, mediante parieto-lobectomía- sea precedida por terapia de inducción.                                                                                             | 2B    |
| Se recomienda la resección quirúrgica, dentro de un esquema terapéutico multidisciplinar, en pacientes con CPCNP T4 por nódulos tumorales ipsilaterales en diferentes lóbulos.                                                         | 1B    |



|                                                                                                                                                                                                                   |    |
|-------------------------------------------------------------------------------------------------------------------------------------------------------------------------------------------------------------------|----|
| La cirugía, dentro de un esquema multidisciplinar, puede ofrecerse a pacientes con CPCNP potencialmente resecables, sin afectación mediastínica y con metástasis suprarrenal o cerebral erradicable.              | 1C |
| La cirugía en el CPCNP solo está indicada cuando la resección puede ser completa o cuando el residuo no resecado sea microscópico o adenopático, pero no macroscópico.                                            | 1C |
| Se recomienda la disección ganglionar sistemática para mejorar la precisión de la estadificación y, eventualmente, aumentar el intervalo libre de enfermedad y la supervivencia.                                  | 2C |
| La resección pulmonar anatómica mediante toracoscopia, cuando sea factible, es preferible a la abierta en pacientes con CPCNP.                                                                                    | 2B |
| En pacientes de alto riesgo de mortalidad operatoria con CPCNP en estadio I y tumores de hasta 2 cm, la segmentectomía anatómica o la resección en cuña, con márgenes negativos, son preferibles a la lobectomía. | 2C |
| La lobectomía es la técnica de elección en el CPCNP en estadio I y II en pacientes que puedan tolerarla funcionalmente.                                                                                           | 1B |
| Se efectuará neumonectomía solo cuando el CPCNP no pueda ser resecado de forma completa mediante lobectomía, incluyendo técnicas broncoangioplásticas.                                                            | 1B |
| En pacientes con CPCNP T4N0-1, cuidadosamente seleccionados, está indicada la cirugía, en el contexto de un tratamiento multidisciplinar.                                                                         | 2B |

## Bibliografía

1. Tanoue LT, Detterbeck FC. New TNM classification for non-small-cell lung cancer. *Expert Rev Anticancer Ther.* 2009;9:413-423.
2. Scottish Intercollegiate Guidelines Network (SIGN). Management of lung cancer. Edinburgh: SIGN; 2014. (SIGN publication no. 137). 2014. Disponible en: <http://www.sign.ac.uk>
3. Arriagada R, Bergman B, Dunant A, Le Chevalier T, Pignon JP, Vansteenkiste J; International Adjuvant Lung Cancer Trial Collaborative Group. Cisplatin-based adjuvant chemotherapy in patients with completely resected non-small-cell lung cancer. *N Engl J Med.* 2004;350:351-60.
4. Detterbeck F. What to do with “Surprise” N2?: intraoperative management of patients with non-small cell lung cancer. *J Thorac Oncol.* 2008;3:289-302.

5. Ito M, Yamashita Y, Tsutani Y, Misumi K, Harada H, Miyata Y, et al. Classifications of N2 non-small-cell lung cancer based on the number and rate of metastatic mediastinal lymph nodes. *Clin Lung Cancer*. 2013;14:651–7.
6. Burdett SS, Stewart LA, Rydzewska L. Chemotherapy and surgery versus surgery alone in non-small cell lung cancer. *Cochrane Database Syst Rev*. 2007;CD006157.
7. Albain KS, Swann RS, Rusch VR, Turrisi AT, Shepherd FA, Smith CJ, et al. Phase III study of concurrent chemotherapy and radiotherapy (CT/RT) vs CT/RT followed by surgical resection for stage IIIA (pN20 non-small cell lung cancer: outcomes update of North American Intergroup 0139 (RTOG 9309) [Abstract]. *J Clin Oncol*. 2005;23(suppl):7014.
8. Song WA, Zhou NK, Wang W, Chu XY, Liang CY, Tian XD, et al. Survival benefit of neoadjuvant chemotherapy in non-small cell lung cancer: an updated meta-analysis of 13 randomized control trials. *J Thorac Oncol*. 2010;5:510–6.
9. Albain KS, Rusch VW, Crowley JJ, Rice TW, Turrisi AT 3rd, Weick JK, et al. Concurrent cisplatin/etoposide plus chest radiotherapy followed by surgery for stages IIIA (N2) and IIIB non-smallcell lung cancer: mature results of Southwest Oncology Group phase II study 8805. *J Clin Oncol*. 1995;13:1880–92.
10. Fowler WC, Langer CJ, Curran WJ Jr, Keller SM. Postoperative complications after combined neoadjuvant treatment of lung cancer. *Ann Thorac Surg*. 1993;55:986–9.
11. Fernandez FG, Force SD, Pickens A, Kilgo PD, Luu T, Miller DL. Impact of laterality on early and late survival after pneumonectomy. *Ann Thorac Surg*. 2011;92:244–9.
12. Daly BD, Fernando HC, Ketchedian A, Dipetrillo TA, Kachnic LA, Morelli DM, et al. Pneumonectomy after high-dose radiation and concurrent chemotherapy for nonsmall cell lung cancer. *Ann Thorac Surg*. 2006;82:227–31.
13. Albertucci M, DeMeester TR, Rothberg M, Hagen JA, Santoscoy R, Smyrk C. Surgery and the management of peripheral lung tumors adherent to the parietal pleura. *J Thorac Cardiovasc Surg*. 1992;103:8-12.
14. Rusch VW, Giroux DJ, Kraut MJ, Crowley J, Hazuka M, Winton T, et al. Induction chemoradiation and surgical resection for superior sulcus non-small-cell lung carcinomas: long-term results of Southwest Oncology Group Trial 9416 (Intergroup Trial 0160). *J Clin Oncol*. 2007;25:313-18.
15. Kozower BD, Larnier JM, Detterbeck FC, Jones DR. Special Treatment Issues in Non-small Cell Lung Cancer. *Chest*. 2013;143(Suppl):e369S–e399S.

16. Kanou T, Okami J, Tokunaga T, Fujiwara A, Ishida D, Kuno H, Higashiyama M. Prognosis associated with surgery for non-small cell lung cancer and synchronous brain metastasis. *Surg Today*. 2014;44:1321-7.
17. Raz DJ, Lanuti M, Gaissert HC, Wright CD, Mathisen DJ, Wain JC. Outcomes of patients with isolated adrenal metastasis from non-small cell lung carcinoma. *Ann Thorac Surg*. 2011;92:1788-1792.
18. Rami-Porta R, Wittekind C, Goldstraw P, International Association for the Study of Lung Cancer (IASLC) Staging Committee. Complete resection in lung cancer surgery: proposed definition. *Lung Cancer*. 2005;49:25-33.
19. Rami-Porta R, Mateu-Navarro M, Freixinet J, de la Torre M, Torres-García AJ, Pun YW, et al; Bronchogenic Carcinoma Cooperative Group of the Spanish Society of Pneumology and Thoracic Surgery (GCCB-S). Type of resection and prognosis in lung cancer. Experience of a multicentre study. *Eur J Cardiothorac Surg*. 2005;28:622-8.
20. Yang HX, Hou X, Lin P, Rong TH, Yang H, Fu JH. Survival and risk factors of surgically treated mediastinal invasion T4 non-small cell lung cancer. *Ann Thorac Surg*. 2009;88:372-8.
21. Dall K, Ford Ch, Fisher R, Dunning J. Is there a survival advantage of incomplete resection of non-small-cell lung cancer that is found to be unresectable at thoracotomy? *Interact Cardiovasc Thorac Surg*. 2013;16:529-32.
22. Sánchez de Cos J, Hernández Hernández J, Jiménez López MF, Padrones Sánchez S, Rosell Gratacós A, Rami Porta R. Normativa SEPAR sobre estadificación del cáncer de pulmón. *Arch Bronconeumol*. 2011;47:454-65.
23. Manser R, Wright G, Hart D, Byrnes G, Campbell DA. Surgery for early stage non-small cell lung cancer. *Cochrane Database Syst Rev*. 2005;CD004699.
24. Gajra A, Newman N, Gamble GP, Abraham NZ, Kohman LJ, Graziano S. Effect of number of lymph nodes sampled on outcome in patients with stage I non-small-cell lung cancer. *J Clin Oncol*. 2003;21:1029.
25. Darling GE, Allen MS, Decker PA, Ballman K, Malthaner RA, Inculet RI, et al. Randomized trial of mediastinal lymph node sampling versus complete lymphadenectomy during pulmonary resection in the patient with N0 or N1 (less than hilar) non-small cell carcinoma: results of the American College of Surgery Oncology Group Z0030 Trial. *J Thorac Cardiovasc Surg*. 2011;141:662.

26. Lardinois D, De Leyn P, Van Schil P, Porta RR, Waller D, Passlick B, et al. ESTS guidelines for intraoperative lymph node staging in non-small cell lung cancer. *Eur J Cardiothorac Surg*. 2006; 30:787.
27. Lim E, Baldwin D, Beckles M, Duffy J, Entwisle J, Faivre-Finn C, et al. Guidelines on the radical management of patients with lung cancer. *Thorax*. 2010;65(Suppl 3):iii1.
28. Scott WJ, Allen MS, Darling G, Meyers B, Decker PA, Putnam JB, et al. Video-assisted thoracic surgery versus open lobectomy for lung cancer: a secondary analysis of data from the American College of Surgeons Oncology Group Z0030 randomized clinical trial. *J Thorac Cardiovasc Surg*. 2010;139:976-981.
29. Port JL, Mirza FM, Lee PC, Paul S, Stiles BM, Altorki NK. Lobectomy in octogenarians with non-small cell lung cancer: ramifications of increasing life expectancy and the benefits of minimally invasive surgery. *Ann Thorac Surg*. 2011;92:1951-7.
30. Yan TD, Black D, Bannon PG, McCaughan BC. Systematic review and meta-analysis of randomized and nonrandomized trials on safety and efficacy of video-assisted thoracic surgery lobectomy for early-stage non-small-cell lung cancer. *J Clin Oncol*. 2009;27:2553-62 .
31. Whitson BA, Groth SS, Duval SJ, Swanson SJ, Maddaus MA. Surgery for early-stage non-small cell lung cancer: a systematic review of the video-assisted thoracoscopic surgery versus thoracotomy approaches to lobectomy. *Ann Thorac Surg*. 2008;86:2008-16.
32. Paul S, Altorki NK, Sheng S, Lee PC, Harpole DH, Onaitis MW, et al. Thoracoscopic lobectomy is associated with lower morbidity than open lobectomy: a propensity-matched analysis from the STS database. *J Thorac Cardiovasc Surg*. 2010;139:366-78.
33. Boffa DJ, Kosinski AS, Paul S, Mitchell JD, Onaitis M. Lymph node evaluation by open or video-assisted approaches in 11,500 anatomic lung cancer resections. *Ann Thorac Surg*. 2012;94:347-53.
34. Paul S, Isaacs AJ, Treasure T, Altorki NK, Sedrakyan A. Long term survival with thoracoscopic versus open lobectomy: propensity matched comparative analysis using SEER-Medicare database. *BMJ*. 2014;349:g5575.
35. Ginsberg RJ, Rubinstein LV. Randomized trial of lobectomy versus limited resection for T1 N0 non-small cell lung cancer. Lung Cancer Study Group. *Ann Thorac Surg*. 1995;60:615-22.
36. Landreneau RJ, Normolle DP, Christie NA, Awais O, Wizorek JJ, Abbas G, et al. Recurrence and Survival Outcomes After Anatomic Segmentectomy Versus Lobectomy

- for Clinical Stage I Non–Small-Cell Lung Cancer: A Propensity-Matched Analysis. *J Clin Oncol*. 2014;32:2449-55.
37. El-Sherif A, Gooding WE, Santos R, Pettiford B, Ferson PF, Fernando HC, et al. Outcomes of sublobar resection versus lobectomy for stage I non-small cell lung cancer: a 13-year analysis. *Ann Thorac Surg*. 2006;82:408-15.
38. Bao F, Ye P, Yang Y, Wang L, Zhang C, Lv X, et al. Segmentectomy or lobectomy for early stage lung cancer: a meta-analysis. *Eur J Cardiothorac Surg*. 2014;46:1-7.
39. Asamura H. Role of limited sublobar resection for early-stage lung cancer: steady progress. *J Clin Oncol*. 2014;32:2403-4.
40. Lederle FA. Lobectomy versus limited resection in T1 N0 lung cancer. *Ann Thorac Surg*. 1996;62:1249-1250.
41. Tan Q, Huang J, Ding Z, Lin H, Lu S, Luo Q. Meta-analysis for curative effect of lobectomy and segmentectomy on non-small cell lung cancer. *Int J Clin Exp Med*. 2014;7:2599-604.
42. Zhang Y, Sun Y, Wang R, Ye T, Zhang Y, Chen H. Meta-analysis of lobectomy, segmentectomy, and wedge resection for stage I non-small cell lung cancer. *J Surg Oncol*. 2015;111:334-40.
43. Shirvani SM, Jiang J, Chang JY, Welsh J, Likhacheva A, Buchholz TA, et al. Lobectomy, Sublobar Resection, and Stereotactic Ablative Radiotherapy for Early-Stage Non-Small Cell Lung Cancers in the Elderly. *JAMA Surg*. 2014;149:1244-53.
44. James TW, Faber LP. Indications for pneumonectomy. *Pneumonectomy for malignant disease*. *Chest Surg Clin N Am*. 1999;9:291-309.
45. Rosen JE, Hancock JG, Kim AW, Detterbeck FC, Boffa DJ. Predictors of mortality after surgical management of lung cancer in the national cancer database. *Ann Thorac Surg*. 2014;98:1953-60.
46. Thomas PA, Berbis J, Baste JM, Le Pimpec-Barthes F, Tronc F, Falcoz PE, et al; EPITHOR group. Pneumonectomy for lung cancer: Contemporary national early morbidity and mortality outcomes. *Ann Thorac Surg*. 2015;149:73-83.
47. The Society for Cardiothoracic Surgery in Great Britain and Ireland. Second National Thoracic Surgery Activity and Outcomes Report 2011. Accesible en: [http://www.scts.org/\\_userfiles/resources/634558869917493937\\_Thoracic\\_2011\\_FINAL.pdf](http://www.scts.org/_userfiles/resources/634558869917493937_Thoracic_2011_FINAL.pdf). Acceso 17 diciembre, 2014.
48. Shapiro M, Swanson SJ, Wright CD, Chin C, Sheng S, Wisnivesky J, et al. Predictors of major morbidity and mortality after pneumonectomy utilizing the Society for

- Thoracic Surgeons General Thoracic Surgery Database. *Ann Thorac Surg.* 2010;90:927-34.
49. Society for Thoracic Surgeons General Thoracic Surgery Database. *Ann Thorac Surg.* 2010;90:927-35.
50. Wahi R, McMurtrey MJ, DeCaro LF, Mountain CF, Ali MK, Smith TL, et al. Determinants of perioperative morbidity and mortality after pneumonectomy. *Ann Thorac Surg.* 1989;48:33-7.
51. Leo F, Scanagatta P, Baglio P, Radice D, Veronesi G, Solli P, et al. The risk of pneumonectomy over the age of 70. A case-control study. *Eur J Cardiothorac Surg.* 2007;31:780-2.
52. Rodríguez M, Gómez Hernández MT, Novoa NM, Aranda JL, Jiménez MF, Varela G. Morbimortalidad de la resección pulmonar en pacientes octogenarios con cáncer de pulmón. *Arch Bronconeumol.* 2015;51:219-22.
53. Kim DJ, Lee JG, Lee CY, Park IK, Chung KY. Long-term survival following pneumonectomy for non-small cell lung cancer: clinical implications for follow-up care. *Chest.* 2007;132:178-84.
54. Ferguson MK, Lehman AG. Sleeve lobectomy or pneumonectomy: optimal management strategy using decision analysis techniques. *Ann Thorac Surg.* 2003;76:1782-8.
55. Cusumano G, Marra A, Lococo F, Margaritora S, Siciliani A, Maurizi G, et al. Is sleeve lobectomy comparable in terms of short- and long-term results with pneumonectomy after induction therapy? A multicenter analysis. *Ann Thorac Surg.* 2014;98:975-83.
56. Stallard J, Loberg A, Dunning J, Dark J. Is a sleeve lobectomy significantly better than a pneumonectomy? *Interact Cardiovasc Thorac Surg.* 2010;11:660-6.
57. D'Andrilli A, Venuta F, Maurizi G, Rendina EA. Bronchial and Arterial Sleeve Resection After Induction Therapy for Lung Cancer. *Thorac Surg Clin.* 2014;24:411-421.
58. Regnard JF, Perrotin C, Giovannetti R, Schussler O, Petino A, Spaggiari L, et al. Resection for tumors with carinal involvement: technical aspects, results, and prognostic factors. *Ann Thorac Surg.* 2005; 80:1841-6.
59. Burt ME, Pomerantz AH, Bains MS, McCormack PM, Kaiser LR, Hilaris BS, et al. Results of surgical treatment of stage III lung cancer invading the mediastinum. *Surg Clin North Am.* 1987;67:987-1000.

60. Yildizeli B, Darteville PG, Fadel E, Mussot S, Chapelier A. Results of primary surgery with T4 non-small cell lung cancer during a 25-year period in a single center: the benefit is worth the risk. *Ann Thorac Surg.* 2008;86:1065–75.
61. Yang HX, Hou X, Lin P, Rong TH, Yang H, Fu JH. Survival and risk factors of surgically treated mediastinal invasion T4 non-small cell lung cancer. *Ann Thorac Surg.* 2009;88:372–9.
62. Reardon ES, Schrupp DS. Extended Resections of Non-small Cell Lung Cancers Invading the Aorta, Pulmonary Artery, Left Atrium, or Esophagus: Can They Be Justified? *Thorac Surg Clin.* 2014;24:457-464.

#### **4.b. QUIMIOTERAPIA. ENFERMEDAD LOCALIZADA Y EXTENDIDA. ENFERMEDAD RESIDUAL. TERAPIAS DIRIGIDAS. RADIOTERAPIA.**

El tratamiento del CPCNP está en constante evolución y actualmente la mayoría de pacientes son subsidiarios de manejo multimodal siendo la QT parte esencial del mismo (1.2).

Así, en pacientes intervenidos con estadio patológico II o III según la clasificación TNM se recomienda QT postoperatoria o adyuvante siempre que la resección haya sido completa y el paciente se haya recuperado de la intervención. En pacientes con resección incompleta (R1 o R2) se recomienda QT y también RT.

Para el tratamiento de pacientes con estadio III o enfermedad localmente avanzada es preciso disponer de un equipo multidisciplinar experimentado ya que no existe una recomendación única siendo opciones válidas la QT de inducción seguida de cirugía o RT, el tratamiento combinado con QT y RT de forma concurrente o secuencial e incluso la aplicación de los tres tratamientos; en todo caso, la QT es la única variable que se mantiene independientemente de la estrategia elegida.

Por último, hasta hace menos de una década, la QT era el tratamiento de elección en todos los pacientes con estadio IV (un tercio al diagnóstico) que tuvieran buen estado general (ECOG 0-1) ya que ha demostrado beneficio en supervivencia, en el control sintomático y en

la calidad de vida. Desde entonces, el descubrimiento de alteraciones moleculares con valor predictivo para la selección del tratamiento han modificado completamente la aproximación diagnóstica y terapéutica así como los resultados esperados en determinados subgrupos de pacientes con enfermedad avanzada, disponiendo en la actualidad de diferentes opciones terapéuticas además de la QT.

#### **4.b.1. Papel de la QT en el estadio III o enfermedad localmente avanzada**

Más de un tercio de los pacientes debutan con enfermedad localmente avanzada y por tanto la elección de la mejor secuencia de tratamiento es crucial para obtener los mejores resultados. Tradicionalmente, se ha asociado el estadio IIIA con un manejo de QT neoadyuvante seguido de cirugía y el estadio IIIB con un manejo de QT y RT bien secuencial bien concurrente. Sin embargo, los límites son cada vez más imprecisos existiendo datos que avalan el papel de la cirugía en subgrupos de pacientes con estadio IIIB así como del papel de la quimiorradioterapia (QT/RT) concurrente previa a la cirugía en estadio IIIA (3,4).

##### *4.b.1.a. Estadio III “resecable”*

La publicación en los años 90 de dos estudios fase III que comparaban cirugía frente a QT basada en cisplatino seguida de cirugía en pacientes con estadio III resecable supuso un cambio en la práctica asistencial, al demostrar un beneficio en supervivencia para los pacientes sometidos al tratamiento combinado. Por ello, uno de los aspectos claves en los últimos años ha sido la búsqueda de las combinaciones de QT más activas y con menor perfil de toxicidad en este contexto. Así, la tasa de respuestas objetivas esperable con un esquema de QT de dos fármacos y que incluya cisplatino está alrededor del 60-70% y la tasa de resecabilidad supera el 50% en la mayoría de las series.

Aunque durante mucho tiempo también ha sido materia de debate si debía incluirse la radioterapia torácica como parte del tratamiento preoperatorio, el estudio fase III comunicado por el grupo suizo SAKK en 2014 (4) no encuentra beneficio ni en supervivencia libre de recaída ni en supervivencia global al asociar RT a la QT preoperatoria en pacientes N2 potencialmente resecable.



Por último, la elección correcta de los pacientes con enfermedad localmente avanzada subsidiarios de cirugía de rescate continúa siendo materia de debate debido a dos estudios aleatorizados en los que no se demostraba beneficio en la supervivencia global.

#### 4.b.1.b. *Estadio IIIB*

Diversos ensayos clínicos randomizados y metaanálisis han demostrado la superioridad de la QT basada en cisplatino asociada a RT frente a la RT sola y el tratamiento concurrente frente al secuencial en pacientes con estadio III irresecable y buen estado general (3). Aspectos relevantes que quedan por definir son: el régimen de QT óptimo para combinar con la RT, si es preferible utilizar dosis plenas o semanales y si deben administrarse dos o tres ciclos de QT. Además, puesto que el tratamiento concomitante solo es factible en pacientes con buen estado general y pérdida de peso inferior al 5%, está por resolver cual es el mejor tratamiento para los pacientes con mala función pulmonar, mal estado general o ancianos así como para los pacientes que teniendo buen estado general, no son candidatos de entrada a tratamiento concurrente por el volumen de irradiación.

Por último, no disponemos de estudios fase III aleatorizados que avalen el uso de QT de inducción o de consolidación asociada al tratamiento concurrente (5,6).

#### *Recomendaciones*

- La elección del mejor tratamiento debe realizarse por un equipo multidisciplinar y con experiencia que sepan minimizar y manejar la toxicidad de estos tratamientos (Grado 1A).
- En CPCNP operados con estadificación pN2, se recomienda valoración de QT adyuvante (Grado 1A) y RT postoperatoria mediastínica (Grado 2C).
- Los pacientes con enfermedad resecable o potencialmente resecable estadio IIIB no bulky, confirmados histológicamente antes de cirugía pueden beneficiarse de tratamiento multimodal con QT versus QT/RT neoadyuvante seguido de cirugía (Grado 1A).
- En CPCNP estadio III irresecable, ECOG 0-1, se recomienda tratamiento combinado de QT y RT (Grado 1A).

## **4.b.2. Papel de la QT en el estadio IV**

### *4.b.2.a. Tratamiento con quimioterapia de primera línea*

Cuando hablamos de QT de primera línea en CPCNP en general nos referimos a una combinación de dos fármacos siendo uno de ellos cisplatino o carboplatino. La QT debe iniciarse en cuanto el paciente se diagnostique, no estando indicado esperar a la aparición de síntomas o el empeoramiento ya que la supervivencia puede verse comprometida. En pacientes con ECOG 0-1 se recomienda administrar entre 4 y 6 ciclos de tratamiento de primera línea, no siendo adecuado aplicar más de 4 en ausencia de respuesta objetiva.

Hasta hace pocos años se consideraba que los distintos dobletes de platino que incluían un fármaco de tercera generación (vinorelbina, gemcitabina, paclitaxel y docetaxel) conseguían resultados similares en tasa de respuesta y supervivencia dependiendo la elección de las características clínicas de cada paciente y el diferente perfil de toxicidad de cada combinación. Sin embargo, un estudio fase III comparando cisplatino-gemcitabina y cisplatino-pemetrexed demostró que la histología era un factor determinante para la elección de QT de forma que los pacientes con histología no escamosa obtenían mejores resultados con el doblete que contenía pemetrexed, lo que no ocurría en los pacientes con carcinoma escamoso (7). Así mismo, la utilización de bevacizumab asociado a QT solo se recomienda en pacientes con histologías no escamosa (8,9) a partir de la publicación del primer estudio fase II en el que la toxicidad era superior en los pacientes con histología escamosa.

Por lo tanto, de acuerdo a las guías nacionales e internacionales en pacientes con CPCNP estadio IV, buen estado general (ECOG 0-1) y no subsidiarios de tratamiento dirigido, la recomendación actual es utilizar una combinación de dos fármacos basada en platino y que contenga docetaxel, gemcitabina, paclitaxel, pemetrexed o vinorelbina puesto que prolonga la supervivencia, mejora la calidad de vida y controla los síntomas (2,3). Distintos metaanálisis muestran una mayor tasa de respuestas de las combinaciones basadas en cisplatino respecto a las basadas en carboplatino. Por otro lado, la adición de un tercer fármaco quimioterápico no ha demostrado beneficio en supervivencia pero si aumento de la toxicidad mientras que los dobletes sin platino se consideran una opción únicamente para los pacientes que no estén en condiciones de recibirlo.

El tratamiento de mantenimiento ha demostrado recientemente impacto en la supervivencia de los pacientes con enfermedad avanzada y por ello se ha incorporado como estrategia terapéutica (10-12). De esta forma, una vez completada la QT de primera línea el paciente continua con monoterapia hasta la progresión o presencia de toxicidad, bien recibiendo uno de los fármacos que se administró en primera línea (mantenimiento de continuación) o bien utilizando un fármaco no recibido previamente. La decisión dependerá del estado general en el momento de tener que iniciar el mantenimiento, de la histología, de la respuesta y la toxicidad del tratamiento administrado en primera línea, y por supuesto de la opinión del paciente.

#### *4.b.2.b. Tratamiento de primera línea en pacientes ancianos*

Actualmente se estima que la mediana de edad al diagnóstico es de 70 años. Aunque sabemos que el envejecimiento es un proceso muy individualizado y la edad cronológica un mal reflejo de la reserva funcional y de la esperanza de vida, la toma de decisiones en pacientes de edad avanzada y, como suele ser el caso en CPCNP, con comorbilidad asociada, es un reto importante.

La recomendación actual para los pacientes con buen estado general (ECOG 0–1) y adecuada función orgánica es QT basada en platino, independientemente de la edad (13). En el resto se recomienda monoterapia.

#### *4.b.2.c. Tratamiento de primera línea en pacientes con ECOG 2 o comorbilidad*

La evidencia científica en este grupo de pacientes es poco concluyente aunque tanto la monoterapia como las combinaciones basadas en platino (fundamentalmente carboplatino) han sido estudiadas (14). La recomendación por tanto sería individualizar la decisión de administrar QT. Por otro lado, lo que si ha demostrado influir favorablemente no solo en calidad de vida sino en la supervivencia de cualquier paciente con estadio IV es el control precoz de síntomas y la atención integral por lo que debe ponerse especial énfasis en ello desde el momento del diagnóstico (15).

### *Recomendaciones*

- En los pacientes con CPCNP estadio IV, buen estado general (ECOG 0-1) no subsidiarios de tratamiento dirigido, la recomendación actual es utilizar una combinación de dos fármacos basada en platino (Grado 1A).
- En pacientes con CPCNP estadio IV, no está recomendado más de 4-6 ciclos de QT de primera línea (Grado 2B).
- En pacientes con CPCNP estadio IV, en ausencia de alteración molecular, la histología es un factor determinante para la elección del tratamiento (escamoso o no escamosos) (Grado 1A).
- En pacientes con CPCNP avanzado que no hayan progresado después de la primera línea, el tratamiento de mantenimiento ha demostrado mejorar la supervivencia frente a placebo (Grado 1A).
- En pacientes de edad avanzada con ECOG 0-1 la QT de combinación basada en platino demostró beneficio frente a la monoterapia, por lo que es una opción terapéutica a considerar (Grado 1A). La monoterapia se recomienda en pacientes frágiles o con comorbilidades importantes (Grado 2B).
- La QT ha demostrado beneficio en supervivencia y calidad de vida frente al mejor tratamiento de soporte en pacientes con ECOG 2 (Grado 1B).

#### **4.b.3. Tratamiento de segunda línea**

La QT de segunda línea ha demostrado beneficio en supervivencia y control de síntomas en pacientes con CPCNP avanzado y ECOG 0-2, independientemente de la histología (16). La combinación de fármacos no ha sido superior frente a la monoterapia, por lo que se recomienda la monoterapia.

En el momento actual disponemos de tres fármacos con indicación aprobada en segunda línea en base a los resultados de ensayos clínicos: docetaxel, pemetrexed (solo para pacientes con histología no escamosa) y erlotinib. Docetaxel demostró beneficio en supervivencia y calidad de vida cuando se comparó con tratamiento de soporte, vinorelbina o ifosfamida mientras que pemetrexed fue comparable a docetaxel en supervivencia si bien la toxicidad fue más manejable. Por último erlotinib ha obtenido resultados comparables a docetaxel y pemetrexed en pacientes pretratados y es el único fármaco con indicación aprobada en tercera línea. Estos datos se basan en un estudio fase III que demostró una ventaja estadísticamente

significativa en supervivencia global (SG) frente al mejor tratamiento de soporte en segunda y tercera línea en pacientes no candidatos a QT y con cualquier histología.

En cuanto a la duración de tratamiento se recomienda continuar hasta progresión, siempre que la tolerancia sea buena. Como siempre, la decisión del mejor tratamiento debe individualizarse en función de las características y deseos del paciente y la respuesta y tolerancia al tratamiento previo.

En ausencia de mutaciones activadoras de EGFR en el tumor, no está indicado ofrecer tratamiento de segunda línea a pacientes con mal estado general (ECOG 3-4)

### *Recomendaciones*

- La QT de segunda línea ha demostrado beneficio en supervivencia y control de síntomas en pacientes con CPCNP avanzado y ECOG 0-2, independiente de la histología (Grado 1A).
- Se recomienda agente único como tratamiento en segunda línea. (Grado 1A).
- La duración de tratamiento se recomienda continuar hasta progresión, siempre que la tolerancia sea buena (Grado 2B).

#### **4.b.4. Tratamiento de pacientes en estadio IV. Papel de las terapias dirigidas**

Durante los últimos años, se han descrito alteraciones genéticas relacionadas con vías moleculares, que se encuentran activadas o reguladas de forma aberrante, con un papel primordial en la patogénesis del cáncer de pulmón, fundamentalmente el CPCNP. Las alteraciones moleculares más comunes son: la mutación en el gen del receptor del EGFR, el reordenamiento del gen de la ALK y la mutación en el gen KRAS.

En la actualidad las mutaciones de EGFR y las traslocaciones de ALK se utilizan en la práctica asistencial como factores predictivos de eficacia terapéutica en pacientes con CPCNP avanzado, de forma que los pacientes que las presentan reciben tratamientos dirigidos en vez de QT convencional.

#### 4.b.4.a. *Mutación EGFR*

La recomendación actual de tratamiento de primera línea en pacientes con CPCNP avanzado que presente mutación de EGFR, con un nivel de evidencia IA (17), es la utilización de alguno de los fármacos orales con actividad ITKs de EGFR comercializados con esa indicación (gefitinib, erlotinib o afatinib).

Esta indicación se sustenta en distintos ensayos comparativos con QT convencional en los que se ha demostrado beneficio en tasa de respuesta ( $\approx 70\%$ ), supervivencia libre de progresión ( $\approx 9$  meses) y en la calidad de vida al recibir el tratamiento dirigido. Con la excepción de los resultados combinados de los estudios de afatinib (18), no se ha demostrado beneficio en supervivencia global, lo que se atribuye al crossover en los distintos estudios.

#### 4.b.4.b. *Reordenamiento de ALK*

Existen diferentes inhibidores de ALK en estudio pero en España sólo está comercializado de momento crizotinib. Este fármaco oral ha demostrado beneficio en estudios fase III frente a QT tanto en primera como en segunda línea de tratamiento (19) aunque de momento la indicación aprobada en España solo recoge la evidencia de segunda línea.

Así mismo, ha sido aprobado muy recientemente ceritinib, inhibidor de ALK de segunda generación, en base a los resultados de un estudio fase I en el que se demuestra elevada eficacia independientemente de haber recibido o no crizotinib (20,21).

### 4.b.5. Radioterapia

#### 4.b.5.1. *Estadios I y II*

##### 4.b.5.1.a. Radioterapia estereotáxica hipofraccionada (SBRT).

Técnica de radioterapia que permite administrar dosis muy elevadas (Dosis Biológica Equivalente-DBE  $\geq 100$  Gy), en un número pequeño de fracciones, de forma limitada exclusivamente a tumores pequeños, con mínima dosis en tejido sano adyacente.

Indicada en pacientes medicamente inoperables, de elevado riesgo quirúrgico o que rechazan cirugía y que tengan estadio I (T1, o  $T2 \leq 5$  cm), localizados a más de 2 cm del árbol bronquial principal y al menos a 1.5 cm de aorta y arteria pulmonar principal (22).

No se dispone de estudios randomizados frente a cirugía (tres se cerraron por lento reclutamiento), pero en no randomizados, el control local y supervivencia global y libre de enfermedad son similares a cirugía (23).

#### 4.b.5.1.b. Radioterapia convencional

Indicada en pacientes no operables que no reúnan criterios para tratamiento con SBRT.

#### 4.b.5.1.c. Radioterapia postoperatoria

No indicada, excepto si margen afecto. En estos casos puede realizarse QT/RT concurrente.

En pacientes intervenidos pN2 suele recomendarse al finalizar la QT adyuvante si bien no hay estudios aleatorizados prospectivos que confirmen su eficacia (24). En últimos años también se han publicado varios trabajos recomendando evaluar su papel en pacientes con estadio pN1, dada la elevada incidencia de recidiva locorregional y el hecho de que el efecto deletéreo que se le atribuía, pudiera estar condicionado por haberse realizado con campos de irradiación grandes y técnica antigua (25).

#### 4.b.5.b. *Estadio III*

##### 4.b.5.b.1. Potencialmente resecable

Puede formar parte del tratamiento preoperatorio junto a la QT (será de primera elección en tumores de sulcus superior) (26) o bien postoperatoria.

Si se opta por QT/RT preoperatoria, aunque la dosis usual de RT era 45-50 Gy, se puede administrar dosis radical de RT (60-66Gy) siempre que la cirugía se realice por un equipo quirúrgico muy entrenado.

#### 4.b.5.b.2. Irresecable

El tratamiento estándar es la QT/RT concurrente (27). En pacientes que no toleren este tratamiento o que tengan un tamaño tumoral muy grande, que no permita irradiación con adecuada preservación de órganos críticos, se realizará QT y RT secuencial. Si el paciente no se le considera candidato a QT, se puede proponer RT exclusiva.

#### 4.b.5.c. *Estadio IV*

La RT está indicada para paliación de síntomas, tanto loco-regional (hemoptisis, síndrome de compresión de la vena cava superior), como en metástasis cerebrales y/o óseas (por dolor, compresión medular, fractura patológica).

En pacientes oligometastásicos muy seleccionados, particularmente en aquellos con reordenamientos de ALK o mutación EGFR y progresión de una única localización, se puede plantear tratamiento con SBRT o con radiocirugía (28).

#### 4.b.5.d. *Braquiterapia endobronquial*

Tratamiento paliativo dirigido a tratar el componente endoluminal del tumor o mitigar los síntomas derivados de la obstrucción generada por él.

Puede ser utilizada en lesiones endobronquiales o endotraqueales primarias o metastásicas que hayan sido tratadas previamente con RT externa y como único tratamiento en casos seleccionados que sólo tengan componente endobronquial y en los que no sea posible administrar otro tratamiento siempre y cuando no haya compresión extrínseca u obstrucción completa del bronquio.

### Resumen de recomendaciones

| Recomendación                                                                                                                                                                                    | Grado |
|--------------------------------------------------------------------------------------------------------------------------------------------------------------------------------------------------|-------|
| <b>QT en estadio III</b><br>La elección del mejor tratamiento debe realizarse por un equipo multidisciplinar y con experiencia que sepan minimizar y manejar la toxicidad de estos tratamientos. | 1A    |



|                                                                                                                                                                                                                                            |    |
|--------------------------------------------------------------------------------------------------------------------------------------------------------------------------------------------------------------------------------------------|----|
| En CPCNP operados con estadificación pN2, se recomienda valoración de QT adyuvante...                                                                                                                                                      | 1A |
| ... y RT postoperatoria mediastínica.                                                                                                                                                                                                      | 2C |
| Los pacientes con enfermedad resecable o potencialmente resecable estadio IIAN2 no bulky, confirmados histológicamente antes de cirugía pueden beneficiarse de tratamiento multimodal con QT versus QT/RT neoadyuvante seguido de cirugía. | 1A |
| En CPCNP estadio III irresecable, ECOG 0-1, se recomienda tratamiento combinado de QT y RT.                                                                                                                                                | 1A |
| <b>QT en estadio IV</b>                                                                                                                                                                                                                    |    |
| En los pacientes con CPCNP estadio IV, buen estado general (ECOG 0-1) no subsidiarios de tratamiento dirigido la recomendación actual es utilizar una combinación de dos fármacos basada en platino.                                       | 1A |
| En pacientes con CPCNP estadio IV, no está recomendado más de 4-6 ciclos de QT de primera línea.                                                                                                                                           | 2B |
| En pacientes con CPCNP estadio IV, en ausencia de alteración molecular, la histología es un factor determinante para la elección del tratamiento (escamoso o no escamosos).                                                                | 1A |
| En pacientes con CPCNP avanzado que no hayan progresado después de la primera línea, el tratamiento de mantenimiento ha demostrado mejorar la supervivencia frente a placebo.                                                              | 1A |
| En pacientes de edad avanzada con ECOG 0-1 la QT de combinación basada en platino demostró beneficio frente a la monoterapia, por lo que es una opción terapéutica a considerar...                                                         | 1A |
| ...La monoterapia se recomienda en pacientes frágiles o con comorbilidades importantes.                                                                                                                                                    | 2B |
| La QT ha demostrado beneficio en supervivencia y calidad de vida frente al mejor tratamiento de soporte en pacientes con ECOG 2.                                                                                                           | 1B |
| <b>Tratamiento de segunda línea</b>                                                                                                                                                                                                        |    |
| La QT de segunda línea ha demostrado beneficio en supervivencia y control de síntomas en pacientes con CPNCP avanzado y ECOG 0-2, independiente de la histología.                                                                          | 1A |
| Se recomienda agente único como tratamiento en segunda línea.                                                                                                                                                                              | 1A |
| La duración de tratamiento se recomienda continuar hasta progresión, siempre que la tolerancia sea buena.                                                                                                                                  | 2B |

## Bibliografía

1. Vansteenkiste J, Crinò L, Doooms C, Douillard JY, Faivre-Finn C, Lim E, et al. 2nd ESMO Consensus Conference on Lung Cancer: early-stage non-small-cell lung cancer consensus on diagnosis, treatment and follow-up. *Ann Oncol*. 2014;25:1462-74.
2. Besse B, Adjei A, Baas P, Meldgaard P, Nicolson M, Paz-Ares L, et al. 2nd ESMO Consensus Conference on Lung Cancer: non-small-cell lung cancer first-line/second and further lines of treatment in advanced disease. *Ann Oncol*. 2014;25:1475-84.
3. Camps C, Felip E, García-Campelo R, Trigo JM, Garrido P; SEOM (Spanish Society of Medical Oncology). SEOM clinical guidelines for the treatment of non-small cell lung cancer (NSCLC) 2013. *Clin Transl Oncol*. 2013;15:977-84.
4. Pless M, Stupp R, Ris HB, Stahel RA, Weder W, Thierstein S, et al. SAKK Lung Cancer Project Group. Induction chemoradiation in stage IIIA/N2 non-small-cell lung cancer: a phase 3 randomised trial. *Lancet*. 2015;386:1049-56.
5. Vokes EE, Herndon JE 2nd, Kelley MJ, Cicchetti MG, Ramnath N, Neill H, et al. Induction chemotherapy followed by chemoradiotherapy compared with chemoradiotherapy alone for regionally advanced unresectable stage III non-small cell lung cancer: Cancer and Leukemia group B. *J Clin Oncol*. 2007;25:1698-1704.
6. Hanna N, Neubauer M, Yiannoutsos C, McGarry R, Arseneau J, Ansari R, et al. Phase III study of cisplatin, etoposide, and concurrent chest radiation with or without consolidation docetaxel in patients with inoperable stage III Non-Small-Cell Lung Cancer: the Hoosier Oncology Group And U.S. Oncology. *J Clin Oncol*. 2008;26:5755-60.
7. Scagliotti GV, Parikh P, von Pawel J, Biesma B, Vansteenkiste J, Manegold C, et al. Phase III study comparing cisplatin plus gemcitabine with cisplatin plus pemetrexed in chemotherapy-naïve patients with advanced-stage non-small-cell lung cancer. *J Clin Oncol*. 2008;26:3543-3551.
8. Soria JC, Mauguén A, Reck M, Sandler AB, Saijo N, Johnson DH, et al. Systematic review and meta-analysis of randomised, phase II/III trials adding bevacizumab to platinum-based chemotherapy as first-line treatment in patients with advanced non-small-cell lung cancer. *Ann Oncol*. 2013;24:20-30.
9. Sandler A, Gray R, Perry MC, Brahmer J, Schiller JH, Dowlati A, et al. Paclitaxel-carboplatin alone or with bevacizumab for non-small-cell lung cancer. *N Engl J Med*. 2006; 355:2542–2550.

10. Paz-Ares LG, de Marinis F, Dediu M, Thomas M, Pujol JL, Bidoli P, et al. PARAMOUNT: Final overall survival results of the phase III study of maintenance pemetrexed versus placebo immediately after induction treatment with pemetrexed plus cisplatin for advanced non-squamous non-small-cell lung cancer. *J Clin Oncol*. 2013;31:2895-902.
11. Ciuleanu T, Brodowicz T, Zielinski C, Kim JH, Krzakowski M, Laack E, et al. Maintenance pemetrexed plus best supportive care versus placebo plus best supportive care for non-small-cell lung cancer: a randomised, double-blind, phase 3 study. *Lancet*. 2009;374:1432-1440.
12. Cappuzzo F, Ciuleanu T, Stelmakh L, Cicenias S, Szczésna A, Juhász E, et al. Erlotinib as maintenance treatment in advanced non-small-cell lung cancer: a multicentre, randomised, placebo-controlled phase 3 study. *Lancet Oncol*. 2010;11:521-529.
13. Quoix E, Zalcman G, Oster JP, Westeel V, Pichon E, Lavolé A, et al. Carboplatin and weekly paclitaxel doublet chemotherapy compared with monotherapy in elderly patients with advanced non-small-cell lung cancer: IFCT-0501 randomised, phase 3 trial. *Lancet*. 2011;378:1079–1088.
14. Lilenbaum R, Villafior VM, Langer C, O'Byrne K, O'Brien M, Ross HJ, et al. Single-agent versus combination chemotherapy in patients with advanced non-small cell lung cancer and a performance status of 2: prognostic factors and treatment selection based on two large randomized clinical trials. *J Thorac Oncol*. 2009;4:869-874.
15. Temel JS, Greer JA, Muzikansky A, Gallagher ER, Admane S, Jackson VA, et al. Early palliative care for patients with metastatic non-small-cell lung cancer. *N Engl J Med*. 2010;363:733–742.
16. Peters S, Adjei A.A, Gridelli C, Reck M, Kerr K, Felip E; ESMO Guidelines Working Group. Metastatic Non-Small-Cell Lung Cancer: ESMO Clinical Practice Guidelines. *Ann Oncol* 2012; 23(Suppl 7):vii56-vii64.
17. Lee CK, Brown C, Gralla RJ, Hirsh V, Thongprasert S, Tsai CM, et al. Impact of EGFR inhibitor in non-small cell lung cancer on progression-free and overall survival: a meta-analysis. *J Natl Cancer Inst*. 2013;105:595-605.
18. Yang JC, Wu YL, Schuler M, Sebastian M, Popat S, Yamamoto N, et al. Afatinib versus cisplatin-based chemotherapy for EGFR mutation-positive lung adenocarcinoma (LUX-Lung 3 and LUX-Lung 6): analysis of overall survival data from two randomised, phase 3 trials. *Lancet Oncol*. 2015;16:141-51.
19. Shaw AT, Kim DW, Nakagawa K, Seto T, Crinó L, Ahn MJ, et al. Crizotinib versus

- chemotherapy in advanced ALK-positive lung cancer *N Engl J Med*. 2013;368:2385-94.
20. Solomon BJ, Mok T, Kim DW, Wu YL, Nakagawa K, Mekhail T, et al. First-line crizotinib versus pemetrexed–cisplatin or pemetrexed–carboplatin in patients (pts) with advanced ALK-positive non-squamous non-small cell lung cancer (NSCLC): results of a phase III study (PROFILE 1014). *J Clin Oncol* 32:5s, 2014 (suppl; abstr 8002).
21. Shaw AT, Kim DW, Mehra R, Tan DS, Felip E, Chow LQ, et al. Ceritinib in ALK-rearranged non-small-cell lung cancer. *N Engl J Med*. 2014;370:1189-97.
22. Palma D, Lagerwaard F, Rodrigues G, Haasbeek C, Senan S. Curative treatment of Stage I non-small-cell lung cancer in patients with severe COPD: stereotactic radiotherapy outcomes and systematic review. *Int J Radiat Oncol Biol Phys*. 2012;82:1149-56.
23. Shirvani SM, Jiang J, Chang JY, Welsh JW, Gomez DR, Swisher S, et al. Comparative Effectiveness of Five Treatment Strategies for Early-Stage Non-Small Cell Lung Cancer in the Elderly. *Int J Radiat Oncol Biol Phys*. 2012;84:1060–1070.
24. Le Péchoux C. Role of postoperative Radiotherapy in Resected Non-Small Cell Lung Cancer: A Reassessment Based on New Data. *The Oncologist*. 2011;16:672-681.
25. Higgins KA, Chino JP, Berry M, Ready N, Boyd J, Yoo DS, et al. Local Failure in Resected N1 Lung Cancer: Implication for Adjuvant Therapy. *Int J Radiat Oncol Biol Phys*. 2012; 83:727-73.
26. Rusch VW, Giroux DJ, Kraut MJ, Crowley J, Hazuka M, Winton T, et al. Induction chemoradiation and surgical resection for superior sulcus non-small-cell lung carcinomas: long-term results of Southwest Oncology Group Trial 9416 (Intergroup Trial 0160). *J Clin Oncol*. 2007;25:313-8.
27. Aupérin A, Le Péchoux C, Rolland E, Curran WJ, Furuse K, Fournel P, et al. Meta-analysis of concomitant versus sequential radiochemotherapy in locally advanced non-small-cell lung cancer. *J Clin Oncol*. 2010;28:2181-90.
28. Yu HA, Sima CS, Huang J, Solomon SB, Rimner A, Paik P, et al. Local therapy with continued EGFR tyrosine kinase inhibitor therapy as a treatment strategy in EGFR-mutant advanced lung cancers that have developed acquired resistance to EGFR tyrosine kinase inhibitors. *J Thorac Oncol*. 2013;8:346-51

#### **4.c. TRATAMIENTO INICIAL POR ESTADIOS (I, II, III y IV). ADYUVANCIA Y TRATAMIENTOS COMBINADOS**

El presente apartado pretende recopilar y englobar los aspectos fundamentales del tratamiento inicial en los distintos estadios clínicos, con la intención de facilitar su consulta. Otras partes de esta sección recogen las mejores evidencias clínicas de las distintas herramientas terapéuticas, pero dada la cada vez más frecuente aplicación de tratamientos multidisciplinarios, en el diseño del presente documento hemos querido incluir este apartado, pese a que en cierta medida pueda ocasionar alguna reiteración. Por ello es aconsejable complementar la consulta del presente apartado con los apartados 4a y 4b para una más completa explicación de las características de los tratamientos y las evidencias disponibles.

La estadificación TNM del carcinoma broncogénico tiene implicaciones diagnósticas, terapéuticas y pronósticas. Se basa en la extensión anatómica del tumor primario (T), metástasis ganglionares (N) y metástasis a distancia (M). Para esta revisión se utiliza la terminología de la última edición TNM publicada a finales de 2009 (7ª edición del TNM del CP, IASLC-UICC-AJCC) (1). Los tumores con un pronóstico y supervivencia similares se agrupan por estadios (I-IV) y permiten seleccionar el mejor tratamiento inicial. De forma muy generalizada, en el estadio I y II el tratamiento inicial es la resección quirúrgica; en el IIIA las opciones pueden ser la cirugía, QT o RT (multidisciplinario). En los estadios IIIB y IV el tratamiento es la QT/RT, reservándose la cirugía para casos muy excepcionales (2,3).

##### **4.c.1. Tratamiento inicial del estadio I**

Este estadio incluye pacientes IA (T1ab,N0,M0) y IB (T2a,N0,M0). El tratamiento de elección es la resección quirúrgica, siempre que el paciente cumpla criterios de operabilidad, obteniéndose supervivencias del 80% a los 5 años. La resección más recomendable es la lobectomía con linfadenectomía (4). En pacientes con graves limitaciones funcionales o importantes comorbilidades, se pueden aceptar las resecciones limitadas (sublobares) a fin de preservar parénquima, aunque es controvertido en términos de recidivas y supervivencia (5-7).

El tratamiento adyuvante con QT/RT no está justificada, salvo en pacientes intervenidos con resecciones incompletas o márgenes afectados que no se puedan reintervenir (indicación absoluta) o en pacientes con factores de riesgo (indicación relativa). Los principales factores de riesgo son: histología pobremente diferenciado, invasión vascular, tumores neuroendocrinos (no bien diferenciados), tamaño tumoral superior a 4 cm, infiltración de la pleural visceral, resecciones en cuña o limitadas, linfadenectomía no realizada (7). La pauta de QT adyuvante recomendada son 4 ciclos de un doblete basado en cisplatino. El régimen más estudiado es el de cisplatino 75 mg/m<sup>2</sup> iv día 1 y vinorelbina 25 mg/m<sup>2</sup> iv días 1 y 8, en ciclos de 21 días, por 4 ciclos. Otros esquemas empleados son cisplatino más gemcitabina, y en pacientes no candidatos a cisplatino, paclitaxel más carboplatino. En estos estadios no se contempla la indicación de QT adyuvante en base a análisis de factores moleculares ni el uso de agentes biológicos o terapias dirigidas.

En los pacientes con contraindicación quirúrgica o que rechazan la cirugía el tratamiento de elección es la RT radical, la cual se puede administrar mediante radioterapia estereotáxica ablativa (SABR), convencional-3D o acelerada. En las lesiones periféricas y menores de 3 cm. se puede plantear la ablación por radiofrecuencia (7).

#### **4.c.3. Tratamiento inicial del estadio II.**

Este estadio está compuesto por el IIA (T1a-bN1M0; T2bN0M0; T2aN1M0) y IIB (T2bN1M0; T3N0M0). El tratamiento inicial es la resección quirúrgica con disección ganglionar mediastínica (7). La resección quirúrgica puede verse ampliada a pared torácica, diafragma, nervio frénico, diafragma, pericardio, etc. En caso de inoperabilidad o rechazo de la cirugía, el tratamiento de elección es la RT radical (SABR o 3D) con o sin QT.

*-Estadio IIA.* El factor pronóstico más importante tras la resección son las metástasis ganglionares (N1), por lo que la QT adyuvante está indicada en los estadios pT1aN1, pT1bN1 y pT2aN1. En el estadio pT2bN0 resecados el papel de la QT es más dudoso, y solo se contempla en casos seleccionados con factores de riesgo. Los factores de riesgo y el régimen de QT es el mismo que el descrito en el apartado del estadio I. Los pacientes en estadio IIA con resecciones incompletas, márgenes quirúrgicos afectados sin reintervención quirúrgica o con factores de mal pronóstico de la linfadenectomía (disección linfática inadecuada o subóptima,

afectación extracapsular y afectación de múltiples estaciones) recibirán tratamiento adyuvante con RT sin QT (ganglios negativos) o QT/RT (ganglios positivos) (5-7).

*-Estadio IIB.* Tras la resección quirúrgica (pT3N0, pT2bN1), los pacientes deben ser tratados mediante QT adyuvante en los casos de pN1 o factores de mal pronóstico. La RT se utiliza si los márgenes quirúrgicos están afectados (sin reintervención quirúrgica) ó si presentan factores de mal pronóstico de la linfadenectomía: disección linfática inadecuada o subóptima, afectación extracapsular y afectación de múltiples estaciones, siguiendo las pautas descritas en el apartado anterior. Una excepción es el tumor del sulcus superior sin afectación ganglionar (T3N0M0), donde la localización anatómica condiciona una resección completa difícil y la posibilidad de márgenes afectos y recaída. El tratamiento recomendable es la QT/RT neoadyuvante concurrente (ver esquemas en apartado del estadio IIB), resección quirúrgica y posterior QT adyuvante (8).

#### *Recomendaciones (estadios I y II)*

- En los pacientes en estadios IA, IB, IIA y IIB sin contraindicación médica el tratamiento de elección es la resección quirúrgica (Grado 1B).
- La resección sublobar se recomienda en los pacientes inoperables o con elevada comorbilidad (Grado 1B).
- Las alternativas terapéuticas en los pacientes que rechazan la cirugía o son inoperables son la RT o la ablación por radiofrecuencia (Grado 2C).
- La RT adyuvante no está recomendada en el estadio I (Grado IA).
- La QT adyuvante se recomienda en el estadio II (N1) (Grado 1A).

#### **4.c.4. Tratamiento inicial del estadio III**

Es un estadio muy heterogéneo, caracterizado por una enfermedad con extensión local y/o afectación ganglionar mediastínica, por lo que su tratamiento es multimodal (9). Los subgrupos que pertenecen a este estadio son el IIIA (T3N1M0; T1-3N2M0; T4N0-1M0) y el IIIB (T4N2M0; T1-4N3M0).

#### 4.c.4.a. *Estadio IIIA*

Son pacientes con neoplasias localmente avanzadas que afectan al mediastino, grandes vasos, pared torácica, bronquio principal, vértebra o nódulos satélites ipsilaterales sin afectación ganglionar mediastínica (T3N1M0 y T4N0-1M0). En estos casos las opciones terapéuticas son variables:

- Si la neoplasia es resecable de inicio, se debe intentar el tratamiento quirúrgico, seguido de QT adyuvante con o sin RT, que dependerá del estadio patológico final. Si tras la cirugía, existe enfermedad microscópica (R1) se puede plantear la reintervención, seguida de QT o QT/RT, ya sea secuencial o concurrente. En caso de que, tras la cirugía, exista enfermedad macroscópica (R2), se recomienda la reintervención seguida de QT o un esquema con QT/RT concurrente.
- Si la neoplasia no es resecable de inicio, pero puede llegar a serlo, se debe iniciar el tratamiento neoadyuvante con QT o QT-RT, seguido de la resección quirúrgica y posterior tratamiento adyuvante. En caso de márgenes afectos, se recomienda, si es posible, la reintervención, seguida de QT o un esquema con QT/RT concurrente en el caso de no haberse administrado RT previamente.
- En los casos de neoplasia no resecable, se debe plantear un esquema de QT/RT concurrente con intención radical.
- En los tumores del sulcus superior (T3N1M0, T4N0-1M0) se recomienda tratamiento concurrente neoadyuvante con QT/RT (ver esquemas en apartado del estadio IIIB), para realizar, con posterioridad, la resección quirúrgica y QT adyuvante.

En los pacientes con afectación ganglionar mediastínica (N2), el pronóstico empeora y la decisión terapéutica es muchas veces controvertida. La enfermedad N2 se asocia en el 80-90% con lesiones que impiden la resección completa (N3, múltiples estaciones, afectación extracapsular, etc.). Por otro lado, el 80% de los pacientes intervenidos desarrollan metástasis a distancia en los primeros 2 años, lo que da lugar a una tasa de supervivencia inferior al 10% a los 5 años de la cirugía. Por estos motivos, el tratamiento se basa en la QT y RT para reducir la progresión local y evitar metástasis a distancia, quedando la cirugía reservada para los casos de respuestas a estas terapias (10-14).



- *N2 confirmado en el acto quirúrgico y neoplasia resecable*: El tratamiento debe ser la resección pulmonar y linfadenectomía radical, seguido de tratamiento adyuvante con QT, con o sin RT (en función de los márgenes quirúrgicos). En algunos centros se acepta este esquema en tumores en los que hay confirmación del N2 con estación ganglionar única, histología epidermoide y edad favorable.
- *N2 confirmado en el acto quirúrgico y neoplasia potencialmente resecable*: Se debe iniciar un tratamiento de QT o de QT/RT neoadyuvante para posterior intento de rescate quirúrgico. Si no hay respuesta, se realiza QT y/o RT radical.
- *N2 confirmado en el acto quirúrgico no potencialmente resecable*: Se procede con QT y RT con intención radical.
- *N2 confirmado de forma preoperatoria*: En esta situación se plantean varias opciones terapéuticas:
  - a) QT de inducción (2-4 ciclos) con regímenes que contengan 2 fármacos basados en platino (preferible con cisplatino), seguido de cirugía (*down-staging mediastinínico*) y posterior adyuvancia.
  - b) QT y RT (45 Gy) concurrente de inducción y cirugía (*down-staging mediastinínico*).
  - c) en pacientes con dificultades quirúrgicas (enfermedad Bulky) o comorbilidades, se puede plantear la QT/RT concurrente con intención radical de inicio.

La dosis de radioterapia adyuvante en los estadios N2 varían entre 54-60 Gy, con fracciones de 1.8 a 2 Gy diarios. Se puede administrar un *boost* en zonas de riesgo como bordes afectos o áreas ganglionares con desbordamiento capsular. Su empleo debe ser siempre secuencial, tras la QT, salvo casos concretos, como cuando se hallan los bordes de resección afectos.

#### 4.c.4.b. *Estadio IIIB*

Los estadios pueden ser el T4N2M0 o el T1-4N3M0. Se caracteriza por la infiltración tumoral directa y/o ganglionar con una supervivencia a los 5 años inferior al 10%. El

tratamiento de elección es la QT/RT concurrente con intención curativa (radical). El papel de la cirugía es anecdótico y muy excepcional, quedando limitada a pacientes con buen estado general, escasa pérdida de peso, respuesta completa a la QT/RT, infiltración ganglionar limitada y resección inferior a una neumonectomía (13-14).

1. *QT/RT concurrente radical*. Se realiza en los pacientes con buen estado general y con pérdida de peso inferior al 5-10%.
2. *QT/RT secuencial*. Para pacientes no aptos para el tratamiento concurrente, se puede emplear un tratamiento secuencial basado en la QT (preferiblemente con cisplatino) a dosis plenas por 2-4 ciclos, seguido de RT radical (60-66Gy).
3. *RT paliativa*. Se utiliza en pacientes sintomáticos, con importante deterioro del estado general o comorbilidades.

### *Recomendaciones*

- En el estadio IIIA resecable y sin afectación N2, el tratamiento propuesto es la resección quirúrgica con QT/RT adyuvante (Grado IA).
- En el estadio IIIA potencialmente resecable sin afectación ganglionar N2, el tratamiento propuesto es la QT/RT neoadyuvante, resección quirúrgica y tratamiento adyuvante (Grado 2C).
- En el estadio IIIA no resecable el tratamiento debería ser la QT/RT radical (Grado IA).
- En el estadio IIIA con afectación N2 intraoperatoria (oculta) el tratamiento es la resección quirúrgica y la QT/RT adyuvante (Grado 1A, 2C).
- El estadio IIIA-N2 preoperatorio el tratamiento puede ser QT/RT definitiva o terapias de inducción y cirugía (Grado 1A).
- En el estadio IIIA-N2 preoperatorio NO se recomienda la resección quirúrgica inicial y terapia adyuvante, salvo excepciones (Grado 1C).
- Pacientes en estadio IIIB y buen estado general, el tratamiento recomendado es la QT/RT concurrente con intención curativa (Grado 1A).

- No se recomienda la cirugía de rescate en los pacientes en estadio IIIB salvo casos muy excepcionales (Grado 1C).

#### **4.c.5. Tratamiento inicial del estadio IV**

A este estadio pertenecen los pacientes con la clasificación T1-4N0-3M1a,b, con una supervivencia muy limitada tras el diagnóstico. Los tratamientos para este estadio son la poliquimioterapia, las terapias dirigidas y muy excepcionalmente la cirugía. Los factores que han demostrado influir en la supervivencia en este estadio son el estado general (ECOG) y la presencia de alteraciones moleculares susceptibles de una terapia dirigida (EGFR).

##### **4.c.5.a. T1-4N0-3M1a**

Los pacientes con derrame pleural o pericárdico maligno y nódulos pleurales malignos únicamente pueden ser tratados con gestos paliativos a nivel local (pleurodesis, drenajes, derivaciones, ventana pericárdica) o sistémicos (QT paliativa).

En los pacientes muy bien seleccionados con un nódulo pulmonar metastásico contralateral, el tratamiento se basa en la cirugía y QT. El abordaje quirúrgico de ambas lesiones puede ser simultáneo o secuencial. Tras la resección de ambas lesiones, la mayoría de los pacientes reciben tratamiento adyuvante con QT, que estará en función de los márgenes quirúrgicos, tratamiento empleado en la neoadyuvancia y el grado de tolerancia del paciente.

##### **4.c.5.b. T1-4N0-3M1b**

La mayoría de los pacientes en este estadio presentan múltiples metástasis a distancia (cerebro, suprarrenal) siendo el tratamiento de elección la QT o QT/RT, en caso de metástasis cerebrales. Sin embargo, en el caso de metástasis única y neoplasias potencialmente resecables (T1-2N0-1; T3N0) se puede plantear el tratamiento radical de ambas lesiones (16-18). La secuencia habitual es el tratamiento de la metástasis única (cirugía, RT, radiocirugía) y posterior tratamiento del CP (cirugía, RT, QT).

#### 4.c.5.c. *Terapias dirigidas.*

Se basan en la detección de las mutaciones del EGFR y reordenamientos ALK que se observan en el 8-10% y 5% respectivamente (19). En general la probabilidad de mutaciones es mayor en pacientes con histología adenocarcinoma, no fumadores, mujeres y de raza asiática, aunque no son exclusivas. Por ello, se recomienda su detección en todos los pacientes con CPCNP en estadio IV con histología no escamosa, y en aquellos casos seleccionados de histología escamosa no fumadores o ex fumadores de menos de 15 paquetes/año. Para los pacientes con mutaciones activadoras de EGFR (exon 19 y 21), el tratamiento recomendado en primera línea es el de ITKs del EGFR. Existen, en la actualidad, 3 ITKs disponibles con indicación para el tratamiento de pacientes con mutaciones de EGFR: erlotinib, gefitinib y afatinib, de más reciente incorporación (20-22). Los principales beneficios de estas terapias son su administración oral diaria y un perfil de toxicidad más tolerable que la QT convencional y el aumento en supervivencia libre de progresión. En los pacientes con reordenamientos de ALK, se recomienda tratamiento con crizotinib cuya indicación actual en España es como tratamiento de segunda línea tras, QT o en pacientes no candidatos a ella, aunque se espera la aprobación para la primera línea. Ceritinib es un nuevo ALK, ha sido recientemente aprobado en Estados Unidos para pacientes en progresión o intolerantes a crizotinib (24-27).

#### 4.c.5.c. *Quimioterapia paliativa*

Es el tratamiento de elección en la mayoría de los pacientes y está basada en platino (15). Las combinaciones óptimas (4-6 ciclos) de quimioterapia con pemetrexed, bevacizumab y las estrategias de mantenimiento han demostrado prolongar la supervivencia más allá de los 14-16 meses. En general el cisplatino es algo más efectivo que el carboplatino, aunque su uso está ligado a un mayor número de efectos secundarios y se recomienda en pacientes con buen estado general. La quimioterapia debe ser seleccionada en función de la histología y del ECOG.

En segunda línea existen tres fármacos con indicación para pacientes candidatos a tratamiento, con diferentes perfiles de toxicidad, como son el docetaxel, el pemetrexed y el erlotinib, cuya selección está en función de la histología, la tolerancia, las características del paciente y las toxicidades asociadas con la primera línea. Algunos pacientes llegan a una tercera línea con buen estado general y pueden ser candidatos a nuevos tratamientos en monoterapia.

#### 4.c.5.d. Terapias de mantenimiento. Antiangiogénicos

El bevacizumab está limitado a pacientes con histología no-escamosa y sin criterios de riesgo de sangrado (hemoptisis, invasión de grandes vasos, tumor central). La combinación de bevacizumab con paclitaxel y carboplatino, o con cisplatino y gemcitabina ha demostrado ser superior a los dobles de platino en primera línea y se considera una opción de primera línea en pacientes jóvenes con histología no-escamosa y sin contraindicación para bevacizumab. En pacientes con beneficio del tratamiento de primera línea (enfermedad estable o respuesta) se suele indicar una terapia de mantenimiento o una segunda línea precoz, tras la primera línea con un fármaco menos tóxico y que se pueda mantener hasta progresión de la enfermedad o toxicidad. Los más empleados en mantenimiento son pemetrexed, bevacizumab y erlotinib. Para los pacientes con histología escamosa, el tratamiento es algo más limitado, no estando indicado el uso de bevacizumab, pemetrexed o las estrategias de mantenimiento (en casos seleccionados se puede plantear un segunda línea precoz con docetaxel).

Tabla 1. Tratamiento inicial por estadio clínico.

| ESTADIO | TNM                         | TRATAMIENTO INICIAL                                                                                                       |
|---------|-----------------------------|---------------------------------------------------------------------------------------------------------------------------|
| IA      | T1aN0M0; T1bN0M0            | <u>Resección Quirúrgica</u><br>**Radioterapia en pacientes no candidatos a cirugía                                        |
| IB      | T2aN0M0                     | <u>Resección Quirúrgica</u><br>**Radioterapia en pacientes no candidatos a cirugía                                        |
| IIA     | T2bN0M0; T1a-bN1M0; T2aN1M0 | <u>Resección Quirúrgica</u><br>**Radioterapia +/- Quimioterapia en casos seleccionados                                    |
| IIB     | T2bN1M0; T3N0M0             | <u>Resección Quirúrgica</u><br>**Radioterapia +/- Quimioterapia en casos seleccionados                                    |
| IIB     | T3N0M0 (sulcus superior)    | <u>Quimioterapia + Radioterapia concurrente neoadyuvante y Cirugía*</u>                                                   |
| IIIA    | T3N1M0; T4N0-1M0            | <u>Resección Quirúrgica</u><br>**Quimioterapia +/- Radioterapia neoadyuvante y Cirugía* (T4 seleccionados)                |
| IIIA    | T1-3N2M0                    | <u>Quimioterapia neoadyuvante y Cirugía*</u><br>Quimioterapia+Radioterapia neoadyuvante y Cirugía* en casos seleccionados |
| IIIB    | T4N2M0                      | <u>Quimioterapia+Radioterapia radical</u><br>Quimioterapia+Radioterapia neoadyuvante y<br>*Cirugía en casos seleccionados |
| IIIB    | T1-4N3M0                    | <u>Quimioterapia+Radioterapia radical</u>                                                                                 |
| IV      | T1-4N0-3M1a-b               | <u>Quimioterapia paliativa/Terapias Dirigidas</u><br>Cirugía y/o Radioterapia en casos seleccionados                      |

\*Cirugía en función de la respuesta al tratamiento quimio-radioterápico. \*\*Pacientes inoperables.

Tabla 2. Selección del tratamiento adyuvante basado en el (TNMp) tras cirugía inicial R0\*.

|              | T           | N     | QT  | RT |
|--------------|-------------|-------|-----|----|
| Estadio 0    | Tis         | N0    | -   | -  |
| Estadio IA   | T1a,T1b     | N0    | -   | -  |
| Estadio IB   | T2a         | N0    | X** | -  |
| Estadio IIA  | T2b         | N0    | X** | -  |
|              | T2a         | N1    | X   | -  |
|              | T1a,T1b     | N1    | X   | -  |
| Estadio IIB  | T2b         | N1    | X   | -  |
|              | T3          | N0    | X   | -  |
| Estadio IIIA | T3          | N1    | X   | -  |
|              | T1,T2       | N2    | X   | X  |
|              | T3          | N2    | X   | X  |
|              | T4          | N0,N1 | X   | -  |
| Estadio IIIB | T4          | N2    | X   | X  |
|              | T1,T2,T3,T4 | N3    | X   | X  |

R0: No tumor residual. R1: Tumor residual microscópico. R2: Tumor residual macroscópico. QT: Quimioterapia. RT: Radioterapia.

\*En casos de cirugía inicial no R0 (R1, R2, bordes afectados) se propondrá como primera opción a valorar la re-intervención con el fin de conseguir márgenes libres, seguido del tratamiento adyuvante según el estadio final. En caso de no ser posible una re-intervención se indicará RT adyuvante +/- QT (a valorar a partir de estadio IIA, secuencial o concurrente).

\*\* Factores de riesgo: grado 3-pobrementemente diferenciados, tumores neuroendocrinos (no bien diferenciados), T>4cm, infiltración de pleural visceral, resecciones en cuña, no linfadenectomía (pNx). Estos factores independientes no son criterios absolutos de indicación para QT adyuvante y deben ser valorados de manera individualizada en cada paciente.

### Recomendaciones

- El tratamiento recomendado es la poliquimioterapia (Grado 1A).
- En los pacientes con la mutación para EGFR, la primera línea de tratamiento son los ITKs (Grado 1A).

- En pacientes muy seleccionados con metástasis cerebral y/o adrenal únicas y neoplasia resecable sin adenopatías mediastínicas se recomienda tratamiento multidisciplinario de ambas lesiones (Grado 1B/2B).

## Resumen de recomendaciones

| Recomendación                                                                                                                                                              | Grado |
|----------------------------------------------------------------------------------------------------------------------------------------------------------------------------|-------|
| <b>Estadios I y II</b>                                                                                                                                                     |       |
| En los pacientes en estadios IA, IB, IIA y IIB sin contraindicación médica el tratamiento de elección es la resección quirúrgica.                                          | 1B    |
| La resección sublobar se recomienda en los pacientes inoperables o con elevada comorbilidad.                                                                               | 1B    |
| Las alternativas terapéuticas en los pacientes que rechazan la cirugía o son inoperables son la RT o la ablación por radiofrecuencia.                                      | 2C    |
| La RT adyuvante no está recomendada en el estadio I.                                                                                                                       | 1A    |
| La QT adyuvante se recomienda en el estadio II (N1).                                                                                                                       | 1A    |
| <b>Estadio III</b>                                                                                                                                                         |       |
| En el estadio IIIA resecable y sin afectación N2, el tratamiento propuesto es la resección quirúrgica con QT/RT adyuvante.                                                 | 1A    |
| En el estadio IIIA potencialmente resecable sin afectación ganglionar N2, el tratamiento propuesto es la QT/RT neoadyuvante, resección quirúrgica y tratamiento adyuvante. | 2C    |
| En el estadio IIIA no resecable el tratamiento debería ser la QT/RT radical.                                                                                               | 1A    |
| En el estadio IIIA con afectación N2 intraoperatoria (oculta) el tratamiento es la resección quirúrgica y la QT/RT adyuvante.                                              | 1A/2C |
| El estadio IIIA-N2 preoperatorio el tratamiento puede ser QT/RT definitiva o terapias de inducción y cirugía.                                                              | 1A    |
| En el estadio IIIA-N2 preoperatorio NO se recomienda la resección quirúrgica inicial y terapia adyuvante, salvo excepciones.                                               | 1C    |
| Pacientes en estadio IIIB y buen estado general, el tratamiento recomendado es la QT/RT concurrente con intención curativa.                                                | 1A    |
| No se recomienda la cirugía de rescate en los pacientes en estadio IIIB salvo casos muy excepcionales.                                                                     | 1C    |
| <b>Estadio IV</b>                                                                                                                                                          |       |

|                                                                                                                                                                                               |       |
|-----------------------------------------------------------------------------------------------------------------------------------------------------------------------------------------------|-------|
| El tratamiento recomendado es la poliquimioterapia.                                                                                                                                           | 1A    |
| En los pacientes con la mutación para EGFR, la primera línea de tratamiento son los ITKs.                                                                                                     | 1A    |
| En pacientes muy seleccionados con metástasis cerebral y/o adrenal únicas y neoplasia resecable sin adenopatías mediastínicas se recomienda tratamiento multidisciplinario de ambas lesiones. | 1B/2B |

## Bibliografía

1. Goldstraw P, Crowley JJ, Chansky K, Giroux DJ, Groome PA, Rami-Porta R, et al. The IASLC Lung Cancer Staging Project: Validation on the proposals for revision of the stage groupings in the forthcoming (seventh) edition of the TNM classification for lung cancer: J. Thorac Oncol. 2007;2:694-705.
2. NCCN Clinical Practice Guidelines in Oncology. Non-small cell lung cancer. Version 4.2016. (<http://www.nccn.org>).
3. Besse B, Adjei A, Baas P, Meldgaard P, Nicolson M, Paz-Ares L, et al. 2nd ESMO Consensus Conference on Lung Cancer: non-small-cell lung cancer first-line/second and further lines of treatment in advanced disease. Annals of Oncology. 2014;25:1475–1484.
4. Fernández Fau L, Pun YW, Moreno Balsalobre R, García Fernández JL. Cáncer de pulmón no células pequeñas. En: Fernández Fau L, Freixinet J. Tratado de Cirugía Torácica, Volumen 2; pp1625-1665. Editores Médicos SA, Madrid 2010.
5. Felip E, Rosell R, Maestre JA, Rodríguez-Paniagua JM, Morán T, Astudillo J, et al. Preoperative chemotherapy plus surgery versus surgery plus adjuvant chemotherapy versus surgery alone in early-stage non-small-cell lung cancer. J Clin Oncol. 2010;28:3138-3145.
6. Iyengar P, Westover K, Timmerman RD. Stereotactic ablative radiotherapy (SABR) for non-small cell lung cancer. Semin Respir Crit Care Med. 2013;34:845-854.
7. Howington JA, Blum MG, Chang AC, Balekian AA, Murthy SC. Treatment of stage I and II non-small cell lung cancer. Chest. 2013;143(Suppl):e278-s-e313-s.



8. Rusch VW, Giroux DJ, Kraut MJ, Crowley J, Hazuka M, Winton T, et al. Induction chemoradiation and surgical resection for superior sulcus non-small-cell lung carcinomas: long-term results of Southwest Oncology Group Trial 9416 (Intergroup Trial 0160). *J Clin Oncol*. 2007;25:313-318.
9. Ramnath N, Dilling TJ, Harris LJ, Kim AW, Michaud GC, Balekian AA, et al. Treatment of stage III Non-small cell lung cancer. *Chest*. 2013;143(suppl):e314S-e340S.
10. Vokes EE, Herndon JE 2nd, Kelley MJ, Cicchetti MG, Ramnath N, Neill H, et al. Induction chemotherapy followed by chemoradiotherapy compared with chemoradiotherapy alone for regionally advanced unresectable stage III non-small cell lung cancer: Cancer and Leukemia Group B. *J Clin Oncol*. 2007;25:1698–1704.
11. Roth JA, Fossella F, Komaki R, Ryan MB, Putnam JB Jr, Lee JS, et al. A randomized trial comparing perioperative chemotherapy and surgery with surgery alone in resectable stage IIIA non-small-cell lung cancer. *J Natl Cancer Inst*. 1994;86:673-680.
12. Taremi M, Hope A, Dahele M, Pearson S, Fung S, Purdie T, et al. Stereotactic body radiotherapy for medically inoperable lung cancer: prospective, single-center study of 108 consecutive patients. *Int J Radiat Oncol Biol Phys*. 2012;82:967-973.
13. Hanna N, Neubauer M, Yiannoutsos C, McGarry R, Arseneau J, Ansari R, et al. Phase III study of cisplatin, etoposide, and concurrent chest radiation with or without consolidation docetaxel in patients with inoperable stage III non-small cell lung cancer: The Hoosier Oncology Group and U.S. Oncology. *J Clin Oncol*. 2008;26:5755–5760.
14. Jalal SI, Riggs HD, Melnyk A, Richards D, Agarwala A, Neubauer M, et al. Updated survival and outcomes for older adults with inoperable stage III non-small-cell lung cancer treated with cisplatin, etoposide, and concurrent chest radiation with or without consolidation docetaxel: analysis of a phase III trial from the Hoosier Oncology Group (HOG) and US Oncology. *Ann Oncol*. 2012;23:1730–1738.
15. Socinski MA, Evans T, Gettinger S, Hensing TA, VanDam Sequist L, Ireland B, et al. Treatment of stage IV non-small cell lung cancer. *Chest*. 2013;143(suppl):e341S-e368S.
16. Mehta MP, Tsao MN, Whelan TJ, Morris DE, Hayman JA, Flickinger JC, et al. The American Society for Therapeutic Radiology and Oncology (ASTRO) evidence-based

- review of the role of radiosurgery for brain metastases. *Int J Radiat Oncol Biol Phys*. 2005;63:37-46.
17. Alexander E, 3rd, Moriarty TM, Davis RB, Wen PY, Fine HA, Black PM, et al. Stereotactic radiosurgery for the definitive, noninvasive treatment of brain metastases. *J Natl Cancer Inst*. 1995;87:34-40.
18. Tanvetyanon T, Robinson LA, Schell MJ, Strong VE, Kapoor R, Coit DG, et al. Outcomes of adrenalectomy for isolated synchronous versus metachronous adrenal metastases in non-small-cell lung cancer: a systematic review and pooled analysis. *J Clin Oncol*. 2008;26:1142-1147.
19. Sequist LV, Yang JC, Yamamoto N, O'Byrne K, Hirsh V, Mok T, et al. Phase III study of afatinib or cisplatin plus pemetrexed in patients with metastatic lung adenocarcinoma with EGFR mutations. *J Clin Onco*. 2013;31:3327-3334.
20. Cappuzzo F, Ciuleanu T, Stelmakh L, Cicenias S, Szczésna A, Juhász E, et al. Erlotinib as maintenance treatment in advanced non-small-cell lung cancer: a multicentre, randomised, placebo-controlled phase 3 study. *Lancet Oncol*. 2010;11:521-529.
21. Cohen MH, Johnson JR, Chattopadhyay S, Tang S, Justice R, Sridhara R, et al. Approval summary: erlotinib maintenance therapy of advanced/metastatic nonsmall cell lung cancer (NSCLC). *Oncologist*. 2010;15:1344-1351.
22. Rosell R, Carcereny E, Gervais R, Vergnenegre A, Massuti B, Felip E, et al. Erlotinib versus standard chemotherapy as first-line treatment for European patients with advanced EGFR mutation-positive non-small-cell lung cancer (EURTAC): a multicentre, open-label, randomised phase 3 trial. *Lancet Oncol*. 2012;13:239-246.
23. Ciuleanu T, Brodowicz T, Zielinski C, Kim JH, Krzakowski M, Laack E, et al. Maintenance pemetrexed plus best supportive care versus placebo plus best supportive care for non-small-cell lung cancer: a randomised, doubleblind, phase 3 study. *Lancet*. 2009;374:1432-1440.
24. Cohen MH, Cortazar P, Justice R, Pazdur R. Approval summary: pemetrexed maintenance therapy of advanced/metastatic nonsquamous, non-small cell lung cancer (NSCLC). *Oncologist*. 2010;15:1352-1358.

25. Coate LE, Shepherd FA. Maintenance therapy in advanced nonsmall cell lung cancer: evolution, tolerability and outcomes. *Ther Adv Med Oncol*. 2011;3:139-157.
26. Shaw AT, Kim DW, Nakagawa K, Seto T, Crinó L, Ahn MJ, et al. Crizotinib versus chemotherapy in advanced ALK-positive lung cancer. *N Engl J Med*. 2013;368:2385-2394.
27. Shaw AT, Kim DW, Mehra R, Tan DS, Felip E, Chow LQ, et al. Ceritinib in ALK-rearranged non-small-cell lung cancer. *N Engl J Med*. 2014;370:1189-1197.

#### **4.d. SEGUIMIENTO. TRATAMIENTO DE LAS RECAÍDAS**

##### **4.d.1. Seguimiento**

No existe un protocolo alguno de seguimiento, universalmente aceptado, dirigido a pacientes tratados con intención curativa de un CPCNP.

El objetivo fundamental de una guía de seguimiento debería ser detectar precozmente las complicaciones derivadas del tratamiento, identificar las recurrencias o recidivas tumorales y la aparición de un segundo tumor, prolongar la supervivencia de estos pacientes y finalmente mejorar los diferentes indicadores de calidad de vida.

En la literatura médica, salvo una revisión sistemática (1), no hay estudios prospectivos randomizados que definan con precisión los diferentes aspectos del seguimiento como son la duración más adecuada del mismo, la frecuencia y el tipo de exploraciones o pruebas que deben ser realizadas; incluso tampoco hay evidencia científica de que la detección precoz y el tratamiento de las recidivas mejoren el pronóstico de la enfermedad.

Para la confección de este capítulo nos hemos apoyado, entre otras trabajos, en las recomendaciones de dos guías clínicas de referencia como son *ESMO guidelines working group* (2) y *ACCP guidelines*, ambas publicadas en 2013 (3).

Los aspectos fundamentales que deben considerarse en el seguimiento de estos pacientes son, en primer lugar, el tratamiento de las potenciales complicaciones derivadas de los diferentes tratamientos recibidos (cirugía, QT o RT). Esta actuación debería ser llevada a cabo por el especialista responsable. En segundo lugar, un objetivo básico de cualquier protocolo de seguimiento es detectar las recidivas tumorales y/o la aparición de un segundo tumor primario. Para cumplimentar este último apartado se recomienda la participación de un equipo multidisciplinar integrado por cirujanos torácicos, neumólogos y oncólogos, sin olvidar en muchos países al personal de enfermería especializada en oncología. También en recientes publicaciones se estudian indicadores de calidad de vida percibida por el paciente durante todo el proceso y también el coste económico que esto representa.

Puesto que la mayoría (hasta el 66 %) de las recaídas se producen durante los 2-3 primeros años tras el tratamiento, se recomienda durante este periodo revisiones cada 3 o 6 meses y posteriormente una vez al año sin precisar tiempo de seguimiento. Respecto a la duración del mismo, un estudio (4) estima que 5 años pueden ser insuficientes para considerar curado a un paciente, sobre todo si hay invasión vascular o afectación adenopática. Algunos autores estiman que el riesgo de recidiva o recurrencia puede ser 3.8% a 15% a partir del quinto año. En tumores carcinoides se considera prudente seguir durante 10 años a dichos pacientes.

La guía de la ESMO recomienda realizar una exhaustiva historia clínica, examen físico y radiología de tórax en todas las visitas médicas, además de una TC de tórax anualmente. Esta última prueba de imagen sería una herramienta útil para detectar recidivas tumorales o aparición de un nuevo tumor primario (incidencia estimada de 2% /paciente /año).

ESMO considera los niveles de evidencia I, II, III, IV y V de mayor a menor evidencia científica según la calidad de los tipos de estudio y clasifica los grados de recomendación en A, B, C, D y E, también de mayor a menor fortaleza.

Las recomendaciones ESMO recogen una fuerte evidencia de eficacia, con beneficio clínico sustancial en recomendar a los pacientes en seguimiento la supresión tabáquica, con una recomendación fuerte basada en estudios randomizados. También recoge una fuerte evidencia de eficacia, beneficio clínico y recomendación para el seguimiento de las complicaciones relacionadas con el tratamiento, detección de recidivas o aparición de un segundo tumor primario para los pacientes con carcinoma no célula pequeña tratados con intención radical, basando la evidencia en estudios de cohortes prospectivos.

En este mismo tipo de estudios basa la recomendación, aunque con un beneficio clínico más limitado, para realizar una visita cada 3-6 meses durante 2-3 años y menos frecuentemente después (por ejemplo una vez al año) y para afirmar que las herramientas más apropiadas en el seguimiento son la historia clínica, el examen físico, la radiografía simple de tórax y la TC.

La última guía de la ACCP publicada en 2013 desarrolla determinadas herramientas (técnicas de imagen -radiografía de tórax y TC-, indicadores de calidad de vida, marcadores séricos tumorales, fibrobroncoscopia) que podrían mejorar los resultados del seguimiento de estos pacientes.

Se ha analizado la evidencia científica que corrobora la necesidad de realizar estudios de imagen. Un trabajo retrospectivo no controlado demuestra un aumento de la supervivencia en seguimientos de TC frente a la radiografía simple de tórax (5), sin embargo otros autores, no señalan mayor supervivencia, a pesar de una mayor detección de recidivas con la TC (6). La utilización de la PET como exploración de imagen en el seguimiento de estos pacientes no se recomienda por el elevado porcentaje de falsos positivos encontrados. Tampoco la ecografía abdominal ni la gammagrafía con receptores de la somatostatina.

Existen pocos estudios que evalúan la importancia de los diferentes aspectos que envuelven el concepto de calidad de vida. (*HRQOL Health – Related Quality of Live*). En la mayor parte de los mismos se emplea el cuestionario de calidad de vida de la *European Organisation for Research and Treatment of Cáncer* (EORTC). Este cuestionario contiene escalas de aspectos funcionales: área física, cognitiva, emocional y social; de síntomas: fatiga, náuseas, vómitos, dolor y una escala de salud global. Así en pacientes con NSCLC resecables, si los resultados oncológicos son los mismos y las recurrencias y supervivencia similares, se debería optar por el procedimiento que genere mayor calidad de vida (ej. VATS versus toracotomía). Un ensayo randomizado (7) observó que el seguimiento por parte de enfermería oncológica se asociaba mayor grado de satisfacción y niveles comparables de vida media y progresión de la enfermedad que la rama de seguimiento convencional por la parte médica.

La verdadera utilidad de los marcadores tumorales sería que su alteración elevase el riesgo de recurrencia, generando así la detección precoz de la misma. Sin embargo no existe evidencia científica para recomendar su uso fuera de los ensayos clínicos. La Sociedad Europea de Oncología Médica sin embargo, aconseja la determinación de la cromogranina A en el seguimiento de los tumores neuroendocrinos.

El papel de la fibrobroncosocopia permanece poco definido. Se recomienda seguimiento con broncoscopia al año en casos de riesgo de recurrencia en el muñón bronquial (márgenes pobres y presencia de adenopatías infiltradas). Algunas sociedades científicas (8) aconsejan realizar fibrobroncoscopia en tumores centrales de estirpe escamosa y en resecciones con riesgo de recidiva del muñón bronquial. Otras modalidades de broncoscopia – autofluorescente - y su empleo con la terapia fotodinámica, pueden tener otras consideraciones. El empleo de la fibrobroncoscopia con fines resectivos se ha empleado en tumores carcinoides típicos con poca base de implantación y sin lesión extrabronquial.

### *Recomendaciones*

- En los pacientes con CPCNP que se han sometido a resección quirúrgica con intención curativa, se sugiere TC torácico cada 6 meses durante los dos primeros años y anualmente después (Grado 2C).
- En pacientes con CPCNP o tumores carcinoides que se han sometido a terapia con intención curativa, se recomienda que sus propios médicos participen en la toma de decisiones durante el seguimiento (Grado 1C).
- Tras el tratamiento con intención curativa en pacientes con CPCNP y tumores carcinoides, el seguimiento rutinario con técnicas de imagen tipo PET, gammagrafía con receptores de somatostatina y ecografía abdominal no es recomendada (Grado 1C).
- En pacientes con CPCNP sometidos a tratamiento con intención curativa, instrumentos que valoren la calidad de vida deben ser empleadas durante las visitas clínicas y durante todo el seguimiento (Gado 2C).
- En pacientes con CP tratados con intención curativa, se sugiere que el seguimiento con biomarcadores no debe ser realizado fuera de los ensayos clínicos (Grado 2C).
- En pacientes con carcinomas escamosos centrales y precoces, tratados con terapia fotodinámica con intención curativa, se recomienda seguimiento broncoscópico en 1, 2 y 3 meses y después cada 3 meses durante el primer año y cada 6 meses hasta el quinto año (Grado 1C).
- En pacientes con lesión endoluminal bronquial tratados con electrocauterio o laser Nd:YAG, se sugiere seguimiento broncoscópico en 6 semanas, luego cada 6 meses durante 2 años y posteriormente anualmente (Grado 2C).

Está probado de manera contundente que el hábito tabáquico es el responsable del 80% de los CP y se ha evidenciado que dejar de fumar disminuye el riesgo de recidivas tumorales y de aparición de segundos tumores primarios en estos pacientes. Con técnicas de farmacoterapia y cambios de hábitos se obtienen éxitos de cesación del tabaco del 25 %.

En el futuro, a medida que se profundice en el conocimiento oncológico, se tenderá a realizar protocolos de seguimiento individualizados atendiendo a las características y al comportamiento de cada tipo de tumor. Determinados datos clínicos, quirúrgicos, histológicos, biomarcadores y mutaciones de algunos oncogenes, definirán un grupo de especial riesgo de recurrencia que precisará por ello seguimiento más estrecho.

Para finalizar, se necesitan estudios bien diseñados que comparen los actuales modelos de seguimiento con otros individualizados, para demostrar el beneficio del seguimiento en términos de detección precoz de recidivas, efecto en la supervivencia, impacto en QOL y costos.

#### **4.d.2. Tratamiento de las recaídas**

En el tratamiento de las recaídas del CPCNP, es importante identificar en un primer momento si se trata de una recurrencia del tumor primario o si es un segundo carcinoma primario pulmonar (SCPP). En algunos casos puede ser imposible discernir entre ambas entidades pero cuando sea posible, ayudará a plantear la estrategia terapéutica.

La recurrencia puede ser local, regional o a distancia. La recurrencia local se define como un tumor que crece en los márgenes de la resección anterior, en la línea de grapas (márgenes quirúrgicos insuficientes), en el muñón bronquial o en el resto del lóbulo en el caso de las resecciones sublobares. La recurrencia regional es la que surge en algún área del hemitórax ipsilateral, incluyendo los ganglios mediastínicos. Por último, la recurrencia a distancia puede ser por metástasis pulmonares contralaterales o pleurales, metástasis extratorácicas o derrame pleural o pericárdico maligno (9,10).

Tras el tratamiento quirúrgico de un CPCNP, la aparición durante el seguimiento de nuevos nódulos pulmonares plantea el diagnóstico diferencial entre una recidiva o un SCPP. Según los criterios descritos por Martini y Melamed en 1975 y que siguen aún vigentes, se considerará un segundo primario cuando las histologías del primer y segundo tumor sean diferentes, o si son de la misma histología, cuando el intervalo entre los 2 tumores sea mayor

de 2 años, cuando el tumor se haya originado de un carcinoma in situ y cuando el tumor aparezca en un lóbulo o pulmón diferente sin presentar metástasis en territorios linfáticos comunes a ambos tumores ni metástasis a distancia (11). En el estudio publicado por Hamaji M et al (12), serie con mayor número de segundos tumores pulmonares metacrónicos tratados mediante resección pulmonar, no hallaron mejor supervivencia si el intervalo libre de enfermedad era mayor de 2 años, por lo que propusieron no utilizar de forma estricta este criterio para diferenciar los segundo tumores primarios de las recurrencias.

#### 4.d.2.a. *Patrones de recurrencia y factores de riesgo de las recaídas*

Los casos de CPCNP que han podido ser tratados quirúrgicamente, aproximadamente el 60% presentarán una recaída loco-regional o a distancia en los primeros 5 años de seguimiento. La mayoría de recurrencias, locales o a distancia, suelen aparecer en los 2 primeros años tras la resección inicial pero pueden ocurrir también varios años más tarde (9). Según diferentes series, el riesgo de recurrencia después de los 5 años de la resección completa del tumor primario, puede estar entre el 3,8 y el 15% (13). Son más frecuentes las recurrencias a distancia y suelen suponer alrededor del 70% de todas las recurrencias detectadas en el seguimiento tras la primera resección (14,15). Los lugares más frecuentes de recurrencia son el pulmón y los ganglios mediastínicos, y las metástasis a distancia más frecuentes son las cerebrales, óseas, hepáticas y adrenales (16). El riesgo de recurrencia loco-regional puede estar entre el 4,6% y 24% con una mediana de intervalo libre de enfermedad de 14-19 meses y el 80% ocurren en los 2 primeros años del seguimiento (17). En el estadio I la recurrencia local puede disminuir al 2,6% (18). En el artículo de Nir Peled et al, con seguimiento mediante broncoscopia al año, hallaron un 4% de recidiva del muñón bronquial, que suponía el 30% de todas las recurrencias locales (19).

El riesgo global de recurrencia aumenta en función de la T y la N (7). La supervivencia libre de enfermedad a los 5 años descendía en el ensayo de Stacey Su et al, del 77% al 58% en los T1 y los T2 (20). Se han descrito diversos factores de riesgo de recurrencia local como el tipo de resección, la histología del tumor, el estadio, la afectación N2, una resección incompleta (R1), la invasión de la pleura visceral o la invasión linfovascular (17,21).

Es importante conocer los patrones de recurrencia y de aparición de segundos primarios para poder distinguirlos y adelantarnos en el diagnóstico de las recaídas, en el momento en el



que todavía puedan tener una opción de tratamiento curativo. En el trabajo publicado por Feiran Lou et al, con 1294 pacientes con cáncer de pulmón en estadio temprano y resección completa, con una mediana de seguimiento de 35 meses el 20% presentaron recurrencia (loco-regional 26%, a distancia 44%, y ambas 30%) y el 7% SCPP (10). El riesgo de recurrencia tuvo un pico en el 2º año postoperatorio (10 eventos por 100 personas-año) y se redujo a los 5 años (2 eventos por 100 personas-año). Por el contrario, el riesgo de SCPP aumentaba a lo largo de los años de 3 eventos por 100 personas-año en el 2º año a 6 eventos por 100 personas-año en el 5º año. En el estudio sobre las dinámicas de recurrencia de Romano Demicheli et al sobre una población de 1506 pacientes operados de CP, hallaron 3 picos de incidencia en la recurrencia global a los 9 meses, 2 años y 4 años (22). Sin embargo, los SCPP seguían una evolución lineal que se podía distinguir claramente de las recurrencias.

#### 4.d.2.b. *Tratamiento de las recurrencias y resultados a largo plazo*

La mayoría de las recurrencias son a distancia y por lo tanto sin opción de un tratamiento curativo. Las recurrencias locales también suelen tener mal pronóstico porque muchas son irresecables en el momento del diagnóstico. Teóricamente, el descubrimiento precoz de una recurrencia loco-regional o de una metástasis a distancia puede permitir el tratamiento multimodal temprano y un mejor pronóstico (9). La aparición de nuevos hallazgos en las exploraciones radiológicas del seguimiento, se deberían discutir en una sesión multidisciplinar para diferenciar entre una recurrencia o un segundo tumor primario, y orientar la actitud terapéutica (23). La filosofía con la que orientar la terapia de las recaídas es importante para elegir el tipo de tratamiento y explicar al paciente el pronóstico esperado. Se puede tratar con una intención curativa definitiva o bien con la aspiración de conseguir un control lo más prolongado posible de una enfermedad que podemos considerar crónica (24).

Existen varios estudios retrospectivos en los que la aplicación de tratamientos con intención curativa sobre la recurrencia obtenía un mejor pronóstico frente en los que se realizó un tratamiento paliativo o de soporte (16,25-27). No obstante, debido a la naturaleza retrospectiva de estos estudios y le elección de los tratamientos en función de la situación del paciente y las características de la recurrencia, se hace difícil distinguir si la mejoría en el pronóstico se debe al tratamiento aplicado o a la selección de los pacientes. El porcentaje de estos últimos en los que es posible aplicar un tratamiento para la recurrencia oscila entre los estudios. Si se considera cualquier tipo de tratamiento con intención curativa o paliativa,

entorno al 70% de los pacientes con recurrencia pueden ser tratados (26). Si tenemos en cuenta solo los tratamientos con intención curativa mediante cirugía, RT o QT/RT, el porcentaje de los que se tratan con esta intención puede disminuir hasta el 26% (25,28). Es más frecuente la posibilidad de aplicar un tratamiento curativo en aquellos en los que la recurrencia se presenta de forma asintomática (28). En el artículo publicado por Yoshihisa Shimada et al y Feiran Lou et al, la mayoría de tratamientos aplicados para la recurrencia eran la QT o la QT/RT siendo menor el porcentaje de sujetos en los que se puede aplicar un tratamiento local con cirugía o RT (10,16). En el estudio de Virginie Westeel et al, la mediana de supervivencia desde la recurrencia fue de 26 meses con tratamiento curativo y 7 con tratamiento paliativo (25). En la revisión de Hiroshi Sugimura et al, hallaron que cualquier tratamiento para la recurrencia local o a distancia, mejoraba el pronóstico frente a no aplicar tratamiento, especialmente el tratamiento quirúrgico solo o en combinación con la RT y la QT/RT (26). Observaron que el resultado es peor en el caso de las recidivas a distancia que en las intratorácicas, y dentro de las metástasis las que peor resultado tienen son las óseas y hepáticas. Chiaki Endo et al, también hallaron una supervivencia mediana postrecurrencia significativamente mayor en los pacientes con algún tratamiento (23,3 meses) frente a los de tratamiento de soporte (4,7 meses) (27).

El tratamiento para la recurrencia del CPCNP tras un tratamiento quirúrgico inicial, dependerá del tipo de recurrencia y la intención de la terapia (curativa o paliativa) (29). En la figura 1 se muestra un esquema de tratamiento de las recurrencias adaptado de la guía de práctica clínica en oncología de la NCCN. Si la recurrencia es loco-regional, tenemos varias opciones de tratamiento paliativo para la obstrucción bronquial (tratamientos broncoscópicos, RT o terapia fotodinámica), de la vena cava superior (RT, QT/RT o stent) o para una hemoptisis amenazante (tratamiento broncoscópicos, RT o cirugía). Si la recurrencia loco-regional es resecable el mejor tratamiento es la cirugía y si el paciente no es operable se podrá tratar con RT o SBRT. Si la recurrencia es regional a nivel de los ganglios mediastínicos el tratamiento indicado será la QT/RT concurrente o sólo QT si el paciente ya había recibido RT previamente. En los casos de recurrencia a distancia, si el paciente presenta síntomas localizados o metástasis cerebrales difusas se aplicará RT paliativa. En las metástasis óseas, el tratamiento con RT paliativa se puede complementar con medidas de estabilización ortopédica o bifosfonatos. Si las metástasis a distancia son únicas y sin recurrencia loco-regional (oligometástasis), la actitud terapéutica será la misma que en los casos en los que aparecen de forma sincrónica con el tumor primario y estará indicado el tratamiento local con cirugía o RT (30,31). Las metástasis que más habitualmente tienen opción de tratamiento con intención curativa son las cerebrales

(cirugía + RT holocraneal o radiocirugía), las adrenales (cirugía) y las óseas (RT o cirugía). Si las metástasis son múltiples se tratará como una enfermedad diseminada de inicio con QT realizándose los estudios de mutación del gen del EGFR y ALK por si existe la posibilidad de aplicar una terapia dirigida (32).

En los casos en los que se produce una recurrencia única y resecable el mejor tratamiento será la cirugía de dicha lesión. En la revisión de Tomoyuki Hishida et al (33), de 1698 pacientes con un CPCNP resecado, el 35% presentaron una recurrencia loco-regional o a distancia, y solo el 5% de éstos se pudieron tratar quirúrgicamente. El resto presentaban metástasis múltiples o los pacientes no se consideraron operables. Los pacientes que fueron operados tuvieron un mejor pronóstico, con una supervivencia a los 5 años de la recurrencia del 26%. Ante una recidiva loco-regional en la que la cirugía no es posible, especialmente en los casos de afectación ganglionar mediastínica, estará indicada la RT para conseguir el control local del tumor. En el trabajo publicado por Chris R. Kelsey et al, consiguieron una mediana de supervivencia de 17 meses tras el tratamiento con RT para la recurrencia loco-regional (34). Jiro Okami et al, obtuvieron una supervivencia libre de enfermedad del 22% a los 5 años en pacientes tratados con RT por recurrencia a nivel de ganglios mediastínicos (35). Fueron factores de buen pronóstico la afectación de estación única ganglionar y la ausencia de síntomas. Estudios más recientes, han demostrado un buen control de las recurrencias loco-regionales en el parénquima pulmonar con la RT estereotáxica, incluso en tumores centrales (36). En los pacientes con una recurrencia loco-regional y un estado general adecuado, estará indicado un tratamiento combinado con RT y QT con intención curativa, al igual que los casos de CPCNP estadio III en el momento del diagnóstico. Se pueden obtener con esquemas de QT basados en el platino y RT a dosis de 60 Gy, supervivencias a los 3 años entorno al 40% y medianas de supervivencia entorno a los 30 meses tras la recurrencia (37,38).

Figura 1. Adaptación del esquema de tratamiento de la recurrencia del CPCNP de la guía de práctica clínica en oncología de la NCCN (29).

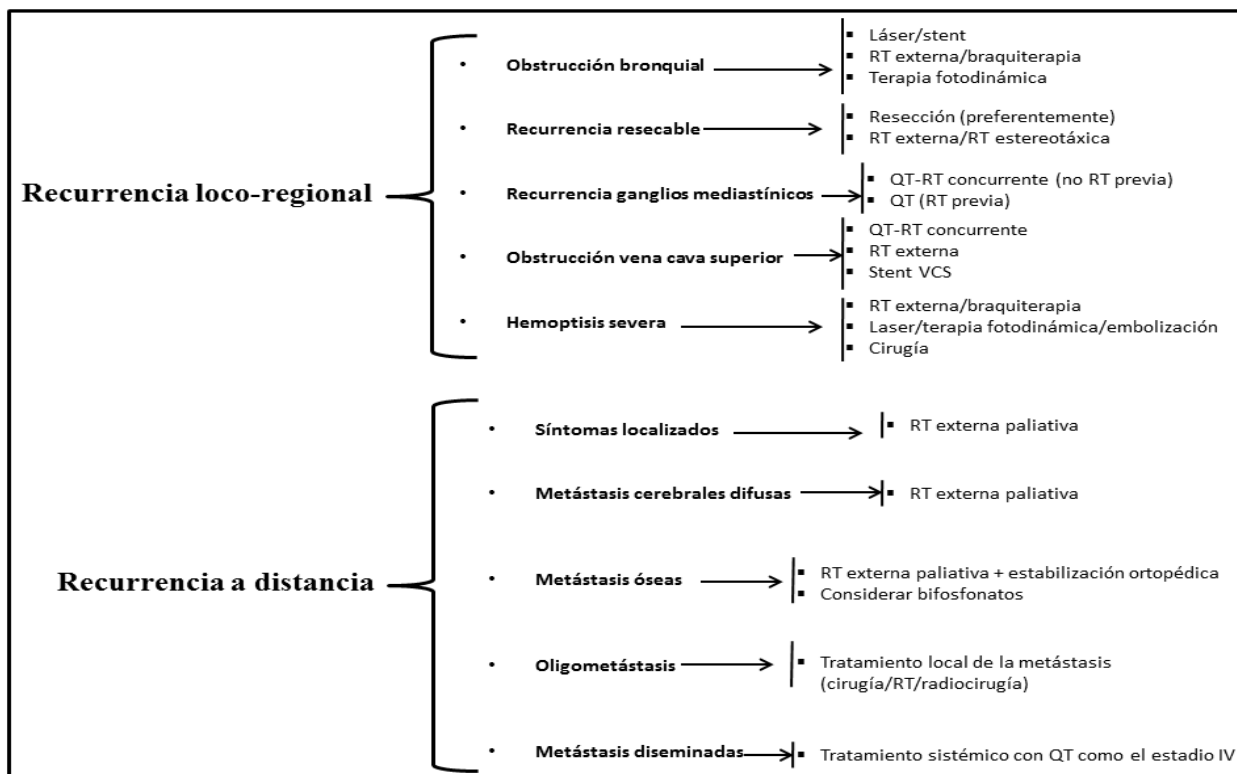

### Recomendaciones

- En pacientes tratados de un CPCNP con una resección completa, el seguimiento intensivo posterior puede conseguir el descubrimiento precoz de una recurrencia loco-regional o de una metástasis a distancia y con un tratamiento multimodal temprano mejorar el pronóstico a largo plazo (Grado 2C).
- En los pacientes que presentan una recurrencia de un CPCNP tras cirugía, si las características de la recurrencia y la condición del paciente lo permiten, se recomienda aplicar un tratamiento agresivo con intención curativa (Grado 1C).
- En la recurrencia loco-regional del CPCNP, si la lesión es resecable, el tratamiento de elección es la cirugía (Grado 1C).
- En la recurrencia del CPCNP a nivel de los ganglios mediastínicos, el tratamiento de elección es la combinación de QT y RT (Grado 1C).
- En la recurrencia del CPCNP en forma de oligometástasis se recomienda realizar un tratamiento local con intención curativa con RT convencional, SBRT o cirugía (Grado 1C).

- En la recurrencia del CPCNP en forma de metástasis diseminadas se recomienda realizar un tratamiento sistémico con QT como en el CPCNP estadio IV de inicio, con análisis de mutaciones del EGFR y ALK para valorar terapias dirigidas (Grado 1C).

## Resumen de recomendaciones

| Recomendación                                                                                                                                                                                                                                                                            | Grado |
|------------------------------------------------------------------------------------------------------------------------------------------------------------------------------------------------------------------------------------------------------------------------------------------|-------|
| En los pacientes con CPCNP que se han sometido a resección quirúrgica con intención curativa, se sugiere TC torácico cada 6 meses durante los dos primeros años y anualmente después.                                                                                                    | 2C    |
| En pacientes con CPCNP o tumores carcinoides que se han sometido a terapia con intención curativa, se recomienda que sus propios médicos participen en la toma de decisiones durante el seguimiento.                                                                                     | 1C    |
| Tras el tratamiento con intención curativa en pacientes con CPCNP y tumores carcinoides, el seguimiento rutinario con técnicas de imagen tipo PET, gammagrafía con receptores de somatostatina y ecografía abdominal no es recomendada.                                                  | 1C    |
| En pacientes con CPCNP sometidos a tratamiento con intención curativa, instrumentos que valoren la calidad de vida deben ser empleadas durante las visitas clínicas y durante todo el seguimiento.                                                                                       | 2C    |
| En pacientes con CP tratados con intención curativa, se sugiere que el seguimiento con biomarcadores no debe ser realizado fuera de los ensayos clínicos.                                                                                                                                | 2C    |
| En pacientes con carcinomas escamosos centrales y precoces, tratados con terapia fotodinámica con intención curativa, se recomienda seguimiento broncoscópico en 1, 2 y 3 meses y después cada 3 meses durante el primer año y cada 6 meses hasta el quinto año.                         | 1C    |
| En pacientes con lesión endoluminal bronquial tratados con electrocauterio o laser Nd:YAG, se sugiere seguimiento broncoscópico en 6 semanas, luego cada 6 meses durante 2 años y posteriormente anualmente.                                                                             | 2C    |
| En pacientes tratados de un CPCNP con una resección completa, el seguimiento intensivo posterior puede conseguir el descubrimiento precoz de una recurrencia loco-regional o de una metástasis a distancia y con un tratamiento multimodal temprano mejorar el pronóstico a largo plazo. | 2C    |
| En los pacientes que presentan una recurrencia de un CPNCP tras cirugía, si las características de la recurrencia y la condición del paciente lo permiten, se recomienda aplicar un tratamiento agresivo con intención curativa.                                                         | 1C    |

|                                                                                                                                                                                                                                         |    |
|-----------------------------------------------------------------------------------------------------------------------------------------------------------------------------------------------------------------------------------------|----|
| En la recurrencia loco-regional del CPCNP, si la lesión es resecable, el tratamiento de elección es la cirugía.                                                                                                                         | 1C |
| En la recurrencia del CPCNP a nivel de los ganglios mediastínicos, el tratamiento de elección es la combinación de QT y RT.                                                                                                             | 1C |
| En la recurrencia del CPCNP en forma de oligometástasis se recomienda realizar un tratamiento local con intención curativa con RT convencional, SBRT o cirugía.                                                                         | 1C |
| En la recurrencia del CPCNP en forma de metástasis diseminadas se recomienda realizar un tratamiento sistémico con QT como en el CPCNP estadio IV de inicio, con análisis de mutaciones del EGFR y ALK para valorar terapias dirigidas. | 1C |

## Bibliografía

1. Schmidt-Hansen M, Baldwin DR, Hasler E. What is the most effective follow-up model for lung cancer patients? A systematic review. *J Thorac Oncol.* 2012;7:821-824.
2. Vansteenkiste J, De Ruyscher D, Eberhardt WEE, Lim E, Senan S, Felip E, et al. Early and locally advanced non-small-cell lung cancer (NSCLC):ESMO clinical practice guidelines for diagnosis, treatment and follow up. *Ann Oncol.* 2013;(suppl 6):89-98.
3. Colt H, Murgu S, Korst R, Slatore Ch, Unger M, Quadrelli S. Follow up and surveillance of the patient with lung cancer after curative –intent therapy. *Chest.* 2013;143(suppl):437-454.
4. Maeda R, Yoshida J, Hishida T. Late recurrence of non-small cell lung cancer more than 5 years after complete resection : incidence and clinical implications in patient follow–up. *Chest.* 2010;138:145-150.
5. British Thoracic Society Standards of Care Committee. BTS statement on criteria for specialist referral, admission, discharge and follow–up for adults with respiratory disease. *Thorax.* 2008; 63(suppl):1-16.
6. Nakamura R, Kurishima K, Kobayashi N. Postoperative follow-up for patients with non-small cell lung cancer. *Onkologie.* 2010;33:14-18.
7. Moore S, Corner J, Haviland J. Nurse led follow up and conventional medical follow up in management of patients with lung cancer :randomized trial. *BMJ.* 2002;325:1145.

8. Goeckenjan G, Sitter H, Thomas M; German Respiratory Society. Prevention, diagnosis, therapy, and follow-up of lung cancer: interdisciplinary guideline of German Respiratory and the German Cancer Society. *Pneumologie*. 2011;65:39-59.
9. Tremblay L, Deslauriers J. What is the most practical, optimal, and cost effective method for performing follow-up after lung cancer surgery, and by whom should it be done? *Thorac Surg Clin*. 2013;23:429-36.
10. Lou F, Huang J, Sima CS, Dycoco J, Rusch V, Bach PB. Patterns of recurrence and second primary lung cancer in early-stage lung cancer survivors followed with routine computed tomography surveillance. *J Thorac Cardiovasc Surg*. 2013;145:75-81;discussion 81-2.
11. Martini N, Melamed MR. Multiple primary lung cancers. *J Thorac Cardiovasc Surg*. 1975;70:606-12.
12. Hamaji M, Allen MS, Cassivi SD, Deschamps C, Nichols FC, Wigle DA, et al. Surgical treatment of metachronous second primary lung cancer after complete resection of non-small cell lung cancer. *J Thorac Cardiovasc Surg*. 2013;145:683-90;discussion 690-1.
13. Colt HG, Murgu SD, Korst RJ, Slatore CG, Unger M, Quadrelli S. Follow-up and surveillance of the patient with lung cancer after curative-intent therapy: Diagnosis and management of lung cancer, 3rd ed: American College of Chest Physicians evidence-based clinical practice guidelines. *Chest*. 2013;143(5 Suppl):e437S-54S.
14. Walsh GL, O'Connor M, Willis KM, Milas M, Wong RS, Nesbitt JC, et al. Is follow-up of lung cancer patients after resection medically indicated and cost-effective? *Ann Thorac Surg*. 1995;60:1563-70;discussion 1570-2.
15. Subotic D, Mandaric D, Radosavljevic G, Stojisic J, Gajic M, Ercegovac M. Relapse in resected lung cancer revisited: does intensified follow up really matter? A prospective study. *World J Surg Oncol*. 2009;12;7:87.
16. Shimada Y, Saji H, Yoshida K, Kakihana M, Honda H, Nomura M, et al. Prognostic factors and the significance of treatment after recurrence in completely resected stage I non-small cell lung cancer. *Chest*. 2013;143:1626-34.

17. Mollberg NM, Ferguson MK. Postoperative surveillance for non-small cell lung cancer resected with curative intent: developing a patient-centered approach. *Ann Thorac Surg.* 2013;95:1112-21.
18. Crabtree TD, Puri V, Robinson C, Bradley J, Broderick S, Patterson GA, et al. Analysis of first recurrence and survival in patients with stage I non-small cell lung cancer treated with surgical resection or stereotactic radiation therapy. *J Thorac Cardiovasc Surg.* 2014;147:1183-1191;discussion 1191-2.
19. Peled N, Flex D, Raviv Y, Fox BD, Shitrit D, Refaeli Y, et al. The role of routine bronchoscopy for early detection of bronchial stump recurrence of lung cancer: 1 year post-surgery. *Lung Cancer.* 2009;65:319-23.
20. Su S, Scott WJ, Allen MS, Darling GE, Decker PA, McKenna RJ, et al. Patterns of survival and recurrence after surgical treatment of early stage non-small cell lung carcinoma in the ACOSOG Z0030 (ALLIANCE) trial. *J Thorac Cardiovasc Surg.* 2014;147:747-52;discussion 752-3.
21. Kelsey CR, Higgins KA, Peterson BL, Chino JP, Marks LB, D'Amico TA, et al. Local recurrence after surgery for non-small cell lung cancer: a recursive partitioning analysis of multi-institutional data. *J Thorac Cardiovasc Surg.* 2013;146:768-773.
22. Demicheli R, Fornili M, Ambrogi F, Higgins K, Boyd JA, Biganzoli E, et al. Recurrence dynamics for non-small-cell lung cancer: effect of surgery on the development of metastases. *J Thorac Oncol.* 2012;7:723-30.
23. Vansteenkiste J, De Ruysscher D, Eberhardt WE, Lim E, Senan S, Felip E, et al; ESMO Guidelines Working Group. Early and locally advanced non-small-cell lung cancer (NSCLC): ESMO Clinical Practice Guidelines for diagnosis, treatment and follow-up. *Ann Oncol.* 2013;24 Suppl 6:vi89-98.
24. Shamji FM, Deslauriers J. Surgeon's view: is palliative resection of lung cancer ever justified? *Thorac Surg Clin.* 2013;23:383-99.
25. Westeel V, Choma D, Clément F, Woronoff-Lemsi MC, Pugin JF, Dubiez A, et al. Relevance of an intensive postoperative follow-up after surgery for non-small cell lung cancer. *Ann Thorac Surg.* 2000;70:1185-90.



26. Sugimura H, Nichols FC, Yang P, Allen MS, Cassivi SD, Deschamps C, et al. Survival after recurrent nonsmall-cell lung cancer after complete pulmonary resection. *Ann Thorac Surg.* 2007;83:409-17;discussion 417-8.
27. Endo C, Sakurada A, Notsuda H, Noda M, Hoshikawa Y, Okada Y, et al. Results of long-term follow-up of patients with completely resected non-small cell lung cancer. *Ann Thorac Surg.* 2012;93:1061-8.
28. Gourcerol D, Scherpereel A, Debeugny S, Porte H, Cortot AB, Lafitte JJ. Relevance of an extensive follow-up after surgery for nonsmall cell lung cancer. *Eur Respir J.* 2013;42:1357-64.
29. National Comprehensive Cancer Network. Clinical practice guidelines in oncology. Non-small cell lung cancer. Therapy for recurrence and metastasis. Version 4. 2016. Disponible en: [www.nccn.org](http://www.nccn.org).
30. Yano T, Haro A, Yoshida T, Morodomi Y, Ito K, Shikada Y, et al. Prognostic impact of local treatment against postoperative oligometastases in non-small cell lung cancer. *J Surg Oncol.* 2010;102:852-5.
31. Macdermed DM, Weichselbaum RR, Salama JK. A rationale for the targeted treatment of oligometastases with radiotherapy. *J Surg Oncol.* 2008;98:202-6.
32. Silva S, Danson S. Targeted therapy and new anticancer drugs in advanced disease. *Thorac Surg Clin.* 2013;23:411-9.
33. Hishida T, Nagai K, Yoshida J, Nishimura M, Ishii G, Iwasaki M, et al. Is surgical resection indicated for a solitary non-small cell lung cancer recurrence? *J Thorac Cardiovasc Surg.* 2006;131:838-42.
34. Kelsey CR, Clough RW, Marks LB. Local recurrence following initial resection of NSCLC: salvage is possible with radiation therapy. *Cancer J.* 2006;12:283-8.
35. Okami J, Nishiyama K, Fujiwara A, Konishi K, Kanou T, Tokunaga T, et al. Radiotherapy for postoperative thoracic lymph node recurrence of non-small-cell lung cancer provides better outcomes if the disease is asymptomatic and a single-station involvement. *J Thorac Oncol.* 2013;8:1417-24.

36. Chang JY, Li QQ, Xu QY, Allen PK, Rebueno N, Gomez DR, et al. Stereotactic ablative radiation therapy for centrally located early stage or isolated parenchymal recurrences of non-small cell lung cancer: how to fly in a "no fly zone". *Int J Radiat Oncol Biol Phys*. 2014;88:1120-8.
37. Bar J, Ng D, Moretto P, Goss GD, Sun A, Macrae R, et al. Chemoradiotherapy for locoregional recurrence of non-small-cell lung cancer after surgical resection: a retrospective analysis. *Clin Lung Cancer*. 2013;14:200-4.
38. Takenaka T, Takenoyama M, Toyozawa R, Inamasu E, Yoshida T, Toyokawa G, et al. Concurrent Chemoradiotherapy for Patients With Postoperative Recurrence of Surgically Resected Non-Small Cell Lung Cancer. *Clin Lung Cancer*. 2014 Jun 21. pii:S1525-7304(14)00114-4.

#### **4.e. TRATAMIENTOS PALIATIVOS QUIRÚRGICOS Y ENDOSCÓPICOS**

##### **4.e.1. Tratamiento quirúrgico paliativo del cáncer de pulmón**

El CP continúa siendo uno de los cánceres más diagnosticados del mundo así como una de las causas de muerte relacionada con cáncer más importantes, a pesar de los avances en el tratamiento. La supervivencia global a 5 años en Europa y Estados Unidos es del 16% (1). Al momento del diagnóstico dos terceras partes de los pacientes presentan metástasis a distancia. Esto nos lleva a una clara necesidad de una estrategia de cuidados paliativos para intentar controlar la enfermedad, reducir los síntomas y sobre todo aumentar la calidad de vida del paciente. Los pilares del tratamiento en el CP avanzado son la QT y la RT. La progresión locoregional frecuentemente deriva en complicaciones que requieren un diagnóstico temprano y tratamiento inminente. Los derrames pleurales malignos, derrames pericárdicos, obstrucción de la vía aérea por lesiones endobronquiales o compresión extrabronquial del tumor, fístula traqueoesofágica, hemoptisis severa y síndrome de vena cava superior son algunas de las situaciones que requieren tratamiento paliativo urgente.

El tratamiento paliativo quirúrgico en el CP avanzado actualmente se encuentra limitado

a derrames pleurales o pericárdicos malignos. Situaciones que antes se consideraban quirúrgicas como estenosis bronquial o traqueal o fístula traqueoesofágica son tratadas hoy en día con éxito endoscópicamente.

#### 4.e.1.a. *Tratamiento del derrame pleural*

El CP es la causa más frecuente de derrame pleural maligno (DPM) siendo responsables de cerca del 40% de todos los DPM (2). Dependiendo de la cantidad de derrame el paciente puede estar asintomático o presentar síntomas como disnea por restricción de la ventilación, tos o dolor pleurítico (3). En 10% de los pacientes se detecta un derrame plural masivo con opacificación de todo el hemitórax (4). La necesidad de tratamiento está determinada por la sintomatología. La toracocentesis es la prueba inicial para determinar si el paciente se beneficiará del manejo quirúrgico del derrame pleural. Hasta 50% de los pacientes no presentan mejoría de los síntomas tras drenar el líquido pleural (5), siendo la disnea originada por otra causa como: pulmón atrapado, linfangitis carcinomatosa o atelectasia por lesión endobronquial. Si los pacientes presentan mejoría de la clínica, el derrame se puede manejar con toracocentesis repetidas sobre todo en el caso de pacientes con enfermedad muy avanzada y expectativa de vida limitada a corto plazo (3). Sin embargo el riesgo de infección debido a toracocentesis repetidas y el malestar del paciente deben de ser tomados en cuenta al valorar un tratamiento más definitivo que prevenga la acumulación del derrame.

##### 4.e.1.a.1. *Pleurodesis*

La pleurodesis requiere una reacción inflamatoria difusa y activación de la cascada de coagulación con depósito de fibrina (6,7). Para conseguir la adherencia entre las pleuras, se puede realizar abrasión mecánica, pleurectomía parcial o pleurodesis química. El requisito primordial para una pleurodesis efectiva es el contacto de la pleura visceral y parietal (8-9). La reexpansión pulmonar incompleta debido a pulmón atrapado, derrame pleural loculado, lesión endobronquial o fuga aérea persistente, se relacionan con malos resultados de la pleurodesis (5,9). El método más utilizado para realizar la pleurodesis, es la instilación de agentes esclerosantes que inducen inflamación pleural, que conduce a la adherencia entre las pleuras visceral y parietal. Las tetraciclinas, a nivel local, han demostrado aumentar un factor de

crecimiento que activa las células mesoteliales y con ello, la proliferación de fibroblastos (10). Dentro de los agentes esclerosantes el que ha demostrado mayor efectividad es el talco. El talco puede ser instilado a través del drenaje endotorácico (*slurry*) de manera efectiva y fácil sobre todo en pacientes que drenan menos de 200 ml al día (8). Este método puede ser utilizado también en pacientes con mal estado general (figura 1).

Figura 1. Recomendaciones para realizar pleurodeis química por drenaje endotorácico (7).

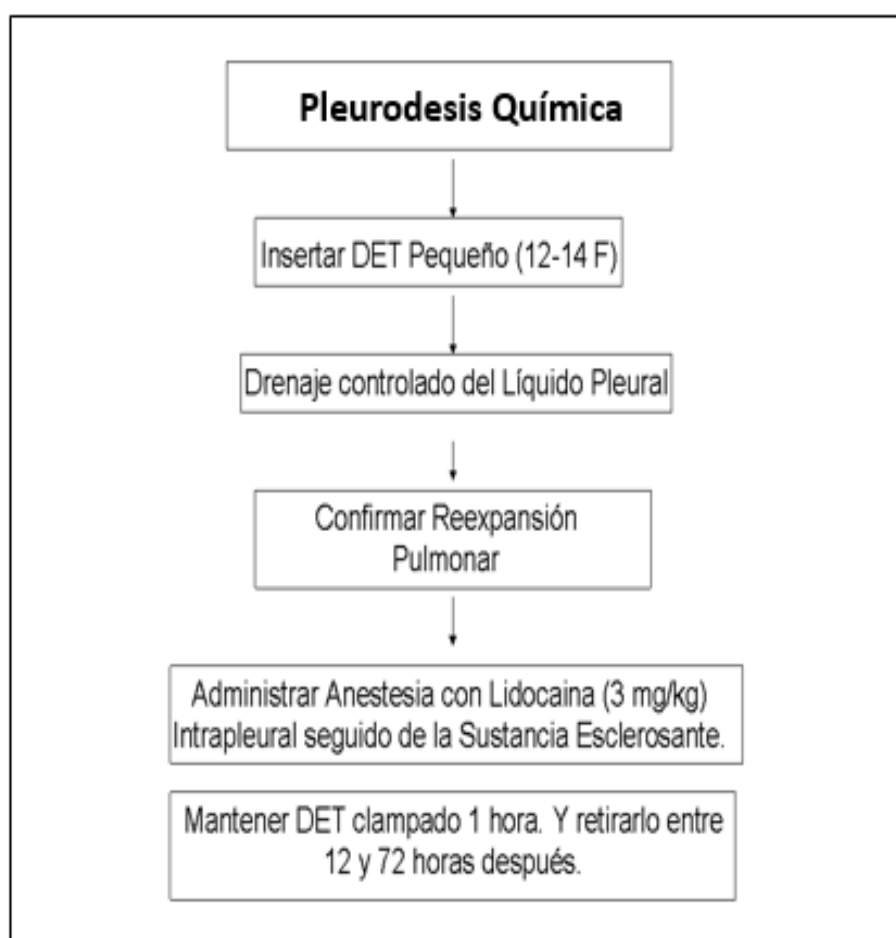

DET: Drenaje endotorácico.

El papel de la VATS ha sido evaluado de manera muy extensa. La instilación de talco por VATS, es una cirugía minimamente invasiva con baja morbi mortalidad, que permite explorar toda la cavidad pleural e instilar el talco bajo visión directa; y su eficacia en la pleurodesis es mayor del 90% sobre todo en pacientes seleccionados (3,11-14). La toracoscopia/pleuroscopia

identifica también si se trata de un pulmón atrapado y es capaz de evaluar la diseminación intrapleural del tumor (5). Sin embargo, su papel en los pacientes con pulmón atrapado está menos claro, aunque el procedimiento puede facilitar la liberación de adherencias y la ruptura de las loculaciones. Muchos estudios comparan la efectividad y seguridad de la instilación de talco a través del drenaje endotorácico con la aplicación del talco por VATS con resultados controvertidos (15). En varios meta análisis y estudios prospectivos la eficacia de la pleurodesis por VATS es superior (16,17), por lo que debe ser considerada como el tratamiento de elección en los pacientes con derrame pleural sintomático recurrente (5). En caso de no tener acceso a cirugía videoasistida o mal estado de paciente la pleurodesis con el método *slurry* debe ser considerada como la primera opción.

#### 4.e.1.a.2. Drenajes pleurales permanentes

En caso de que la pleurodesis no pueda realizarse debido a un muy mal estado general, corta esperanza de vida o falta de reexpansión pulmonar post evacuación, se puede introducir un catéter de manera permanente permitiendo así al paciente el manejo ambulatorio (3). Este tipo de catéter tunelizado se mantiene dentro de la cavidad pleural y puede ser conectado de manera intermitente a una botella de vacío. Este método evita las hospitalizaciones. En un estudio prospectivo (18) acerca de la efectividad y seguridad el catéter PleurX, fueron incluidos 51 pacientes con derrame pleural maligno no susceptible para pleurodesis. En menos de 25 horas después de la inserción del catéter los pacientes eran dados de alta. Complicaciones inmediatas como neumotórax, enfisema subcutáneo y dolor se observaron el 8% de los pacientes. El 14% de los pacientes presentaron alguna complicación tardía como salida del catéter o infección. En 11 pacientes se pudo retirar al haber conseguido fusión de las pleuras. Por lo tanto este tipo de catéter resulta una opción segura en el manejo del DPM.

En resumen, un derrame pleural maligno sintomático requiere un manejo en varios pasos con la finalidad de conseguir paliar los síntomas y prevenir la acumulación del líquido pleural. Las modalidades terapéuticas incluyen la pleurodesis, la toracocentesis evacuadora seriada o la inserción de un catéter permanente. En pacientes que presentan adecuado estado general la pleurodesis debe ser realizada bajo visión directa con cirugía VATS o pleuroscopia. La instilación de talco *slurry* puede ofrecerse a pacientes que no son candidatos a cirugía. Para pacientes con muy mal estado general, expectativa de vida corta o reexpansión pulmonar

incompleta, la inserción de un catéter permanente es una opción segura y eficaz. La Normativa SEPAR sobre el diagnóstico y tratamiento del derrame pleural actualizada de 2014 (19), incorpora un algoritmo de manejo del derrame pleural maligno (figura 2).

Figura 2. Algoritmo de actuación en la sospecha de derrame pleural maligno (19).

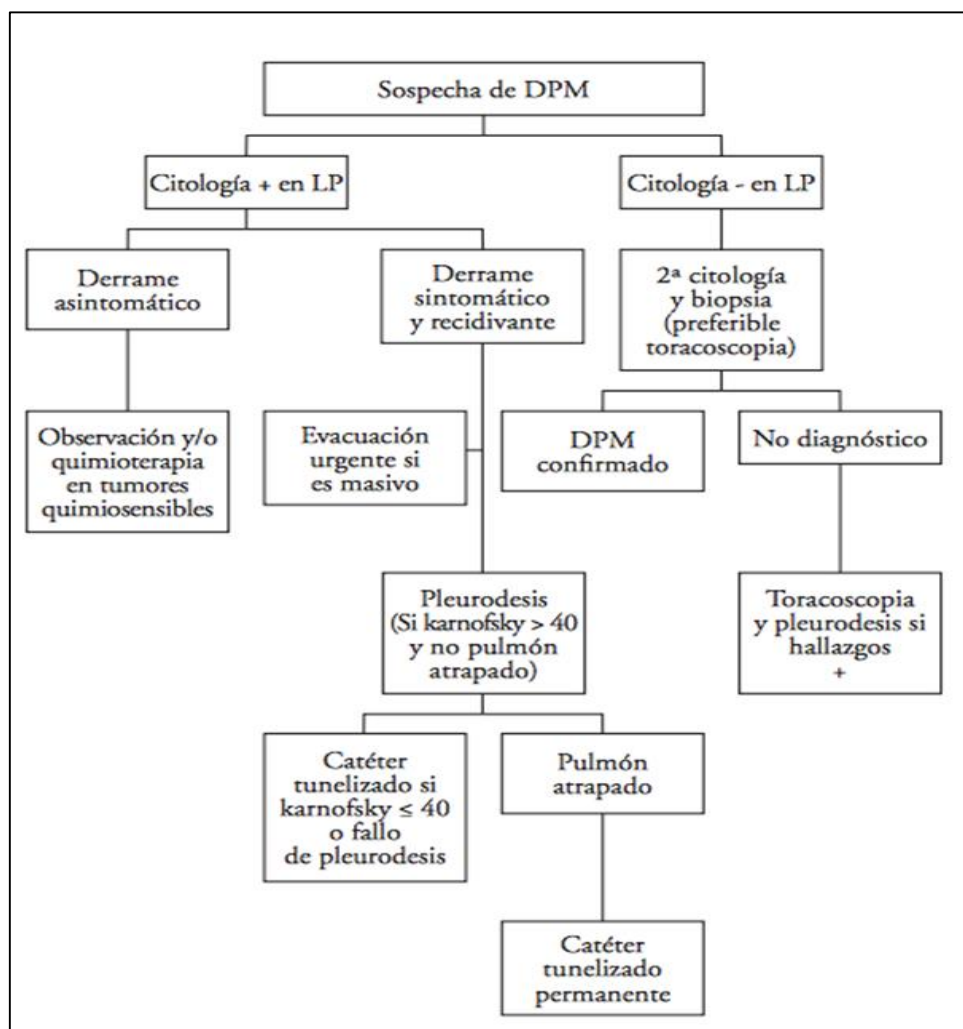

DPM: Derrame pleural malign. LP: Líquido pleural.

### Recomendaciones

- Dependiendo de la cantidad de derrame el paciente puede estar asintomático o presentar síntomas como disnea por restricción de la ventilación, tos o dolor pleurítico (Grado 1C).

- Si los pacientes presentan mejoría de la clínica, el derrame se puede manejar con toracocentesis repetidas sobre todo en el caso de pacientes con enfermedad muy avanzada y expectativa de vida limitada a corto plazo (Grado 1C).
- La instilación de talco por VATS, es una cirugía minimamente invasiva con baja morbilidad, que permite explorar toda la cavidad pleural e instilar el talco bajo visión directa, y su eficacia en la pleurodesis es mayor del 90% sobre todo en pacientes seleccionados (Grado 1C).
- En caso de que la pleurodesis no pueda realizarse debido a un muy mal estado general, corta esperanza de vida o falta de reexpansión pulmonar post evacuación, se puede introducir un catéter de manera permanente permitiendo así al paciente el manejo ambulatorio (Grado 1C).

#### 4.e.1.b. *Tratamiento del derrame pericárdico*

En series de autopsias de pacientes con enfermedades neoplásicas, la prevalencia de derrame pericárdico y metástasis miocárdicas es del 21%, el 36.5% debido a CP (20). La diseminación pericárdica del tumor causa derrames pericárdicos malignos. Las metástasis microscópicas o derrames pequeños son asintomáticos (21). Dependiendo de la cantidad de líquido las manifestaciones clínicas van desde pacientes asintomáticos hasta descompensaciones cardiovasculares o taponamiento cardiaco. El taponamiento se manifiesta como disnea, taquipnea, taquicardia, hipotensión, pulso paradójico y distensión venosa yugular. El diagnóstico se realiza por ecocardiografía aunque el derrame pleural puede ser evidente también en radiografía de tórax o TC torácico. El electrocardiograma muestra signos típicos de derrame pericárdico.

El primer paso en el manejo del derrame pericárdico es el drenaje percutáneo bajo control de ecografía (21). Es una intervención muy bien tolerada con poca morbilidad incluso en pacientes con mal estado general (14). Para conseguir el contacto completo entre el pericardio parietal y visceral se puede insertar un catéter (22,23). La tasa de recurrencia del derrame tras pericardiocentesis es del 40% por lo que existen métodos quirúrgicos y no quirúrgicos para minimizar el índice de recurrencia del derrame.

##### 4.e.1.b.1. *Procedimientos quirúrgicos*

El más común es la pericardiectomía subxifoidea o la ventana pleuropericárdica videoasistida o por toracotomía. Estos procedimientos consiguen una comunicación persistente por la cual el líquido es drenado y la adherencia entre las dos capas de pericardio (13). La ventaja de los procedimientos quirúrgicos frente a la pericardiocentesis ha sido demostrada en varios estudios (24).

#### 4.e.1.b.2. Agentes esclerosantes

La colocación de drenaje pericárdico e instilación de agentes esclerosantes promueve la adherencia entre el pericardio visceral y parietal. Existen agentes esclerosantes “puros” y agentes citotóxicos. Los primeros utilizados fueron los agentes “puros” como la tetraciclina y la doxiciclina. Su eficacia se ha documentado en muchos estudios (25,26) sin embargo los efectos secundarios como dolor torácico y fiebre son muy frecuentes. Los agentes esclerosantes “citotóxicos” utilizados para el DPM, como la bleomicina, han demostrado mayor efectividad con menos morbilidad (27). Otro agente esclerosante citotóxico que puede ser utilizado para prevenir la recurrencia del derrame pericárdico es la tiotepa.

#### 4.e.1.b.3. Quimioterapia local

La finalidad de la QT intrapericárdica es la involución de las metástasis miocárdicas y pericárdicas utilizando una alta concentración de drogas antineoplásticas. Los quioterápicos más frecuentemente utilizados para la instilación local son el carboplatino (28), el cisplatino (29) y la mitoxantrona (20).

Como conclusión, el derrame pericárdico sintomático recurrente frecuentemente requiere intervención inmediata. En situaciones urgentes como el taponamiento cardiaco, la pericardiocentesis es el tratamiento de elección y se traduce en alivio sintomático inmediato. Los derrames pericárdicos recurrentes se pueden beneficiar de intervenciones quirúrgicas, instilación de agentes esclerosantes o QT local.

#### 4.e.2. Tratamientos paliativos endoscópicos.



Cuando el carcinoma broncogénico se diagnostica en un estadio avanzado que no permite aplicar el tratamiento quirúrgico y tiene expresión endobronquial, en su evolución pueden producirse situaciones, como atelectasias de todo un pulmón o lobares, hemoptisis, neumonías obstructivas, que pueden beneficiarse de un tratamiento endoscópico, lo que permite prolongar la supervivencia y mejorar la calidad de vida de los pacientes. Los métodos endoscópicos que podemos aplicar son las prótesis endobronquiales o stents, la coagulación con plasma de argón, la resección con láser, la criocirugía endoscópica, la braquiterapia endobronquial, la electrocoagulación endobronquial y la terapia fotodinámica (tabla 1).

#### 4.e.2.a. *Prótesis traqueobronquiales o stents*

La colocación de estas prótesis está indicada en obstrucciones traqueobronquiales malignas en pacientes que están recibiendo tratamiento con RT y/o QT (o que han agotado otras opciones de tratamiento), en zonas localizadas de importante colapso de la vía aérea (traqueobronquiomalacia) como secuela tras otros tratamientos paliativos y en fístulas traqueales o traqueoesofágicas por crecimiento del tumor o como secuela de tratamientos como la RT.

Las prótesis traqueobronquiales se colocan mediante broncoscopia rígida utilizando anestesia general o sedación. Por tanto, cuando no se puedan emplear alguno de estos métodos, estará contraindicada la utilización de las prótesis. También están contraindicadas antes de tratamientos con láser, electrocauterización endobronquial o coagulación con plasma de argón, porque estos tratamientos pueden quemar o romper las prótesis (30). Sin embargo, el tratamiento con RT externa o la braquiterapia no contraindican su uso.

Las prótesis se fabrican de diversos materiales, tamaños y formas. La mayoría son de silicona, metal o mixtas:

- *Prótesis de silicona*: Son el tipo de prótesis más frecuentes, son resistentes, estables a altas temperaturas y repelen el agua. Son relativamente inexpansibles, bien toleradas, no se colapsan y resisten compresiones extrínsecas por tumores, ganglios linfáticos aumentados de tamaño o cicatrices fibróticas circunferenciales. Por el contrario tienen una cualidad indeseable que es su tendencia a desplazarse con mayor frecuencia que otros tipos de prótesis y requieren repetidas broncoscopias para recolocarlas. La colocación de las prótesis de silicona normalmente requiere broncoscopio rígido y anestesia general, aunque está

descrito el uso de broncoscopio flexible (31,32). En estenosis largas pueden colocarse varias prótesis alineadas. Para recolocarlas o extraerlas es necesario utilizar fórceps. Están disponibles de diversas longitudes, formas y calibres y pueden fabricarse de distintas consistencias dependiendo de las indicaciones y del tiempo estimado que requieran estar colocadas. La más utilizada es la Studded Dumon.

Tabla 1. Resumen tratamientos endoscópicos paliativos en carcinoma broncogénico.

| PROCEDIMIENTO                       | INDICACIONES                                                                                                                                                         | COMPLICACIONES                                                                                                                                                                                          |
|-------------------------------------|----------------------------------------------------------------------------------------------------------------------------------------------------------------------|---------------------------------------------------------------------------------------------------------------------------------------------------------------------------------------------------------|
| PROTESIS TRAQUEOBRONQUIALES O STENT | <ul style="list-style-type: none"> <li>-Estenosis por compresión extrínseca.</li> <li>-Fístulas traqueobronquiales.</li> <li>-Fístulas traqueoesofágicas.</li> </ul> | <ul style="list-style-type: none"> <li>-Obstrucción.</li> <li>-Inflamación local.</li> <li>-Migración.</li> <li>-Perforación vía aérea.</li> <li>-Infección vía aérea.</li> <li>-Hemoptisis.</li> </ul> |
| COAGULACIÓN CON PLASMA DE ARGÓN     | <ul style="list-style-type: none"> <li>-Estenosis por lesiones exofíticas.</li> <li>-Hemostasia.</li> </ul>                                                          | <ul style="list-style-type: none"> <li>-Quemaduras.</li> <li>-Perforación vía aérea.</li> <li>-Embolia gaseosa.</li> </ul>                                                                              |
| RESECCIÓN CON LASER                 | <ul style="list-style-type: none"> <li>-Estenosis por lesiones exofíticas.</li> </ul>                                                                                | <ul style="list-style-type: none"> <li>-Hemorragia.</li> <li>-Perforación vía aérea.</li> <li>-Necrosis vía aérea.</li> <li>-Fístulas.</li> <li>-Embolia gaseosa.</li> </ul>                            |
| CRIOTERAPIA                         | <ul style="list-style-type: none"> <li>-Estenosis por lesiones exofíticas.</li> <li>- Hemoptisis por tumores.</li> </ul>                                             | <ul style="list-style-type: none"> <li>-Método muy seguro.</li> <li>-Hemorragia masiva.</li> </ul>                                                                                                      |
| BRAQUITERAPIA                       | <ul style="list-style-type: none"> <li>-Recidiva tumoral tras dosis plenas de radioterapia (RT).</li> <li>-Intolerancia a la RT.</li> </ul>                          | <ul style="list-style-type: none"> <li>-Hemoptisis masiva.</li> <li>-Fístulas.</li> <li>-Bronquitis postradiación.</li> <li>-Broncoestenosis.</li> </ul>                                                |
| ELECTROCOAGULACIÓN                  | <ul style="list-style-type: none"> <li>-Estenosis por lesiones exofíticas.</li> <li>-Más barato que el laser.</li> </ul>                                             | <ul style="list-style-type: none"> <li>-Fuego intrabronquial.</li> <li>-Hemoptisis.</li> <li>-Perforación.</li> <li>-Neumonía.</li> </ul>                                                               |
| TERAPIA FOTODINÁMICA                | <ul style="list-style-type: none"> <li>-Estenosis por lesiones exofíticas en bronquios distales.</li> </ul>                                                          | <ul style="list-style-type: none"> <li>-Fotosensibilidad.</li> <li>-Perforación.</li> <li>-Hemoptisis.</li> <li>-Fiebre.</li> <li>-Disnea por edema</li> </ul>                                          |

- *Prótesis de metal*: Presentan ventajas sobre las de silicona, ya que se suelen colocar con fibrobroncoscopio, con anestesia local y sedación y raramente se desplazan. Las prótesis metálicas autoexpandibles generan suficiente fuerza como para dilatar las estenosis más rígidas y a veces no requieren dilatación previa antes de colocarlas. Entre las desventajas se encuentra; el mayor riesgo de perforación de la vía aérea, debido a su mayor fuerza de expansión, lo que requiere una selección más precisa del tamaño de la prótesis (máximo diámetro de dilatación), la mayor dificultad o imposibilidad de recolocación (33), el crecimiento con mayor facilidad del tejido de granulación o el tumor entre los huecos que deja el metal, lo que provoca obstrucción, y que las prótesis metálicas son más caras. Debido a las numerosas complicaciones, cuando es necesario su uso se emplean prótesis metálicas recubiertas. Las más usadas son las Ultraflex, puede tener una capa externa de silicona que evita el crecimiento del tumor o tejido de granulación. Las prótesis de Cook-Gianturco con simple o doble diámetro postexpansión pueden enlazarse una a otra en estenosis largas. Una desventaja es que cuando están mucho tiempo colocadas pueden producir perforación de la vía aérea cuando el tumor crece a través de los espacios de la malla de alambre (34).

- *Prótesis híbridas*: Se fabrican de 2 o más materiales y son más caras que las de un solo material. Se diseñaron para solucionar los problemas de la prótesis de silicona y de metal. Tipos de prótesis híbridas: Wallstent recubierta, Dynamic Y stent (Rüsch Y-stent), Poliflex, Aero stent; son más caras que las de silicona y migran con facilidad.

Cualquier paciente portador de una prótesis que desarrolla nuevos síntomas respiratorios (tos, disnea) necesita una broncoscopia para saber si existe reobstrucción o migración de la prótesis. La broncoscopia de revisión a los 2-3 meses de colocación de la prótesis es controvertida, la mayoría de los autores no lo recomiendan y sólo hacerla cuando haya síntomas (35).

Las prótesis suelen ser bien toleradas, y aunque pueden producirse complicaciones, son raras las graves. Pueden provocar una inflamación local, lo cual favorece el crecimiento de tejido de granulación en el extremo proximal y distal de la prótesis. También se puede producir obstrucción, por acumulación de secreciones respiratorias o crecimiento del tumor, y la migración de la prótesis debido a tos intensa o persistente, crecimiento del tumor o resolución de la compresión extrínseca que mantenía la prótesis en su posición. Las prótesis autoexpandibles pueden perforar la vía aérea o se pueden romper. Además, puede ocurrir una

disminución de la fuerza de compresión (por rotura de alambres o fatiga del metal) e inflamación o infección de la vía aérea inferior. Cuando se producen complicaciones es necesario recolocarlas o extraerlas, sobre todo en las metálicas. En un estudio durante 10 años con prótesis metálicas que necesitaron extraerse (36), el 58% sufrieron complicaciones. Las más frecuentes fueron la reobstrucción (46%), la insuficiencia respiratoria tras el procedimiento (33%) y lesión de la mucosa (16%).

#### 4.e.2.b. *Coagulación con plasma de Argón*

La coagulación con plasma de argón (CPA) es una técnica electroquirúrgica de ablación térmica sin contacto. Utiliza el gas de argón para generar calor que se puede utilizar para reseca una estenosis endobronquial o producir hemostasia. El calor provoca la desnaturalización de las proteínas y evapora el agua intra y extracelular. Esto produce destrucción del tejido y coagulación.

Se consiguen mejores resultados cuando las lesiones son polipoideas, tienen un gran componente endobronquial, se localizan en la tráquea o bronquios principales y son de corta longitud. También cuando se puede visualizar la vía aérea a través de la lesión y el pulmón distal es funcionante.

La tasa de éxito es similar entre CPA, electrocauterización, láser, crioterapia, braquiterapia y terapia fotodinámica. De todas ellas, sólo la CPA, electrocauterización y el láser, pueden destruir el tejido rápidamente y por tanto, consiguen un efecto inmediato y la CPA es más efectiva que los otros en conseguir hemostasia. Por todo ello la CPA está reemplazando al láser como tratamiento de ablación térmica (37).

Las complicaciones son infrecuentes, se producen en menos del 1% de los casos. Las más frecuentes son las quemaduras y perforación de la vía aérea que pueden provocar neumomediastino, enfisema subcutáneo y neumotórax, y la embolia gaseosa (el gas emboliza a través de las venas bronquiales cuando se aplica en los bronquios y a través de venas sistémicas cuando se aplica en la tráquea) (38).

#### 4.e.2.c. *Resección broncoscópica con láser*

El láser es útil en obstrucciones malignas de la vía aérea proximal causada por lesiones exofíticas y no es útil en obstrucciones por compresión extrínseca. Las obstrucciones de la vía aérea causadas por carcinoma broncogénico son la indicación más frecuente, cuando se han agotado otras opciones terapéuticas y puede combinarse con otros métodos endoscópicos como la electrocirugía, crioterapia, prótesis, dilatación y braquiterapia.

El más utilizado es el láser de neodmium-yttrium-aluminum-garnet (Nd:YAG). Su energía se libera a través de fibras flexibles que permite utilizarlo mediante broncoscopio rígido o flexible. Por su longitud de onda es invisible, pero se utiliza con una fuente de luz roja de helio-neón que nos indica cuándo y dónde estamos aplicando el láser. El láser Nd:YAG consigue desobstruir la vía aérea de dos formas: resección y vaporización. La vaporización se puede realizar mediante broncoscopio rígido o flexible. La resección se realiza con broncoscopio rígido porque así el tejido desvitalizado es más fácilmente extraíble con pinzas o con aspirador. Además se puede introducir un fibrobroncoscopio para extraer restos de sangre y de tejidos en la vía aérea distal.

En manos experimentadas las complicaciones son poco frecuentes e incluyen hemorragia, perforación de la vía aérea, necrosis de la vía aérea y formación de fístulas. La embolia gaseosa es mucho más rara, pero puede provocar isquemia miocárdica o accidentes cerebrovasculares. En una serie de 2610 procedimientos en 1838 pacientes se consiguió mejoría de los síntomas en el 90% de los pacientes (39). El intervalo medio entre el primer y segundo procedimiento fue de 102 días y la mortalidad fue menor del 1%.

#### 4.e.2.d. *Crioterapia broncoscópica*

Es una técnica en la que el tejido endobronquial se destruye por repetida congelación y descongelación. La principal indicación es como tratamiento paliativo en obstrucciones de la vía aérea por tumores malignos, en pacientes que no toleran la resección por mala función respiratoria o que son inoperables por la proximidad del tumor a la carina (40). Otras indicaciones menos frecuentes son los carcinomas microinvasivos inoperables y hemoptisis por tumores. Puede utilizarse mediante broncoscopio rígido o fibrobroncoscopio. En cambio, no sirve cuando la estenosis se debe a compresión extrínseca y debe evitarse cuando es probable que el desprendimiento de tejidos provoque insuficiencia respiratoria. En estos casos es

preferible un procedimiento que reseque el tejido e inmediatamente restaure la vía aérea (con el láser).

#### 4.e.2.e. *Braquiterapia*

Consiste en la aplicación de un isótopo radioactivo dentro o en la proximidad de un tumor endobronquial para aplicar RT local; de esta forma se libera una alta dosis de radiación en la proximidad del tumor y se evitan los efectos adversos de la RT externa. Se utiliza con fines paliativos, pero en algunos casos como tratamiento definitivo, en pequeños tumores muy localizados. Actualmente se aplica con fibrobroncoscopio a través del cual se introduce un catéter de polietileno que transporta el isótopo, se comprueba por radioscopia su localización y después se coloca en isótopo manualmente o por control remoto (41). Hay 2 tipos de braquiterapia; de tasa de baja dosis (*low dose rate-LDR*), que libera menos de 2 Gray/hora (dosis total de 1500-5000 Gy administradas en 3 días), y de tasa de alta dosis (*high dose rate-HDR*), donde se aplican 10-12 Gy/hora (dosis total de 500-4000 Gy) y la dosis por sesión varía entre 300-1000 Gy.

Esta indicada en casos de intolerancia o falta de respuesta a tratamientos potencialmente curativos o citorreductores como el láser o la crioterapia, de intolerancia a la RT externa por mala función pulmonar, en lesiones que por su localización se les pueda aplicar un catéter de braquiterapia (las localizadas en tráquea, bronquios principales o bronquios de los lóbulos inferiores), y cuando la expectativa de vida mayor de 3 meses. Esta contraindicada cuando existen fístulas entre los bronquios y otras estructuras.

Una complicación frecuente es la bronquitis por radiación y estenosis. Puede ocurrir días o semanas después del tratamiento y se manifiesta por tos o estridor. Favorecen esta complicación el carcinoma de células grandes, el uso de braquiterapia con intención curativa y la aplicación previa de láser o RT externa concurrente. La hemoptisis masiva o fistulización es una complicación muy grave y en algunas series sucede hasta en el 42% (42,43). Para disminuir el riesgo es mejor evitar tratar lesiones que afecten a grandes vasos, que produzcan importante destrucción de la pared bronquial o invadan el mediastino.

En la comparativo de la braquiterapia con la radioterapia una revisión sistemática que incluye algunos pequeños estudios alatorizados demostró que la radioterapia externa es más efectiva en la paliación de los síntomas que la braquiterapia, por lo que es recomendable

primero la RT externa, siempre que sea posible (44). Además, en una revisión sistemática con un pequeño número de ensayos se ha demostrado que la combinación de braquiterapia más radioterapia externa no consigue más beneficio que la radioterapia externa sólo.

#### 4.e.2.f. *Electrocoagulación endobronquial*

La electrocoagulación produce una rápida destrucción del tejido tumoral en una sola sesión, lo que la hace apropiada para tratar lesiones que producen insuficiencia respiratoria aguda o hemoptisis. Este efecto también lo produce el láser, pero éste es muy caro, por lo que no está disponible en muchas partes del mundo.

La destrucción térmica del tejido puede utilizarse con un efecto de coagulación o de resección. La coagulación se produce por el relativamente lento calentamiento del tejido hasta los 70°C. Existen 3 tipos de coagulación:

- Coagulación débil: el electrodo unipolar o bipolar se coloca directamente en contacto con el tejido y se aplica una corriente de menos de 200 voltios. Se utiliza para coagular (detener el sangrado).
- Coagulación intensa: el electrodo se pone en contacto con el tejido y se aplica una corriente de al menos 500 voltios. Se produce la vaporización del tejido.
- Coagulación modo spray: el electrodo y el tejido no tienen contacto directo. Se necesita un alto voltaje que produce la destrucción y carbonización del tejido. Se utiliza cuando necesitamos cortar y vaporizar una gran superficie

La resección sólo se produce corte cuando se produce un arco voltaico intenso concentrado en un punto. La temperatura que se alcanza en este punto es tan alta que el tejido se evapora o se quema inmediatamente.

Por otro lado, esta contraindicada cuando existe compresión extrínseca de la vía aérea, ya que al no existir tumor endobronquial puede producirse un orificio en el bronquio. Cuando se emplea para destruir el crecimiento del tumor entre los alambres de una prótesis de metal, debe hacerse con la precaución de no tocar los alambres porque éstos pueden romperse. La electrocoagulación unipolar puede desprogramar los marcapasos y desfibriladores, por lo que deben usarse con mucho cuidado en estos pacientes.

En relación con las posibles complicaciones, la aplicación de electrocoagulación profunda demasiado cerca de la pared bronquial puede provocar perforación y neumotórax. También pueden destruirse los anillos cartilaginosos y provocar traqueo-broncomalacia o estenosis secundaria. Además, los arcos voltaicos generados pueden quemar la tráquea o el tubo endotraqueal, fibrobroncoscopio o las prótesis de silicona. El riesgo aumenta con FiO<sub>2</sub> mayor de 0.4. El sangrado se puede producir cuando la sonda penetra en el tumor, dando lugar a sangrados significativos en el 2% de casos, aunque es más frecuente en tumores más vascularizados como los carcinoides y hamartomas. La neumonía por aspiración en el pulmón contralateral puede ocontecer cuando se desobstruye un bronquio con pus distal a dicha obstrucción, las quemaduras eléctricas en paciente o médico cuando se utilizan electrodos unipolares y aparatos sin toma de tierra y la fibrilación ventricular cuando se utiliza cerca del corazón e interfiere con la función de marcapasos o desfibriladores.

#### *4.e.2.g. Terapia fotodinámica*

Está indicada en el tratamiento de carcinomas no microcíticos con microinvasión endobronquial en pacientes que no toleran el tratamiento quirúrgico o la radioterapia, y para disminuir la obstrucción y paliar síntomas en pacientes con obstrucción total o parcial por CPCNP.

Se utilizan una mezcla de diferentes derivados de la porfirina. Se administran 2 mg/kg IV durante 5-10 minutos. El fármaco se elimina del organismo en 72 horas, pero persiste durante mucho tiempo en los tumores, piel (más de 30 días), hígado y bazo. Debido a la especial retención en las células tumorales y el endotelio vascular, la reacción citotóxica de las porfirinas es especialmente selectiva con las células neoplásicas (45). A las 48 horas de haber inyectado la dosis el tumor se expone a una fuente de luz, que desencadena la reacción citotóxica.

Las fuentes de luz más utilizadas son el láser de argón o el láser KTP (potasio-titanil-fosfato) que emiten una luz fría. El efecto de la terapia fotodinámica no es inmediato. La energía total liberada depende del tiempo de tratamiento tras la inyección del agente sensibilizante y de la energía liberada a través de la fibra. Para localizar adecuadamente la extensión y profundidad del tumor es recomendable realizar EBUS antes de empezar el procedimiento (46). Se realizan aplicaciones de 200 julios durante 8 minutos con el láser KTP.



El principal efecto adverso es la fotosensibilización de la piel que puede durar de 4-6 semanas. También es frecuente la tos y expectoración hemoptoica y sensación de opresión torácica debido a la respuesta inflamatoria. A las 24-48 horas del tratamiento el edema y las secreciones pueden comprometer la vía aérea, y puede requerirse una fibrobroncoscopia para aspirar secreciones y detritus y, en casos graves, intubación y ventilación mecánica.

La terapia fotodinámica es potencialmente curativa en estadios iniciales de tumores endobronquiales. Se realizó un estudio observacional con 175 pacientes sometidos a esta técnica como tratamiento de un CPNCP estadio I de localización endobronquial, donde la tasa de supervivencia a 5 años fue del 93% (47) y se consiguió un efecto paliativo en la mayoría de pacientes con obstrucción endobronquial. También es efectiva en el tratamiento de lesiones superficiales, recidivas del muñón bronquial, obstrucciones endobronquiales distales y metástasis endobronquiales de otros tumores. La eficacia de la terapia fotodinámica y el láser Nd:YAG en el tratamiento paliativo de las obstrucciones endobronquiales es similar, pero la primera no produce humo, se puede utilizar con altas concentraciones de oxígeno, el riesgo de perforación es menor y su efecto es más prolongado.

#### *4.e.2.h. Tratamiento paliativo endoscópico según la patología*

La Neumología Intervencionista engloba una gran variedad de procedimientos efectivos para el tratamiento paliativo del CP, que deben integrarse en una terapia multidisciplinar. Aunque sus indicaciones aún se encuentran poco definidas, su eficacia es indiscutida en los pacientes seleccionados que cumplen los requisitos. A continuación se exponen las recomendaciones terapéuticas correspondientes a diferentes guías reconocidas, que han sido elaboradas con el objetivo unificar y definir dichas indicaciones.

##### *4.e.2.h.1. Obstrucción de la vía aérea*

En los casos de obstrucción sintomática de la vía aérea por CP debe realizarse broncoscopia rígida para tratamiento de la estenosis endobronquial mediante resección tumoral intraluminal. Para ello, los procedimientos terapéuticos más habituales serán la resección mecánica con el mismo broncoscopio, las sondas de láser, la crioterapia y electrocauterio, los balones de dilatación bronquial, los stents y los catéteres de succión a través del canal del

broncoscopio (48). En casos más limitados la obstrucción de la vía aérea por un tumor endobronquial puede tratarse mediante broncoscopia flexible con electrocauterio, argón-plasma, láser Nd-YAG o crioterapia insertado el fibrobroncoscopio a través de un tubo endotraqueal o una mascarilla laríngea (49).

### *Recomendación*

- Ante el diagnóstico de CP en estadio avanzado y obstrucción sintomática de la vía aérea, el tratamiento broncoscópico mediante desbridamiento mecánico, ablación tumoral o colocación de stents está recomendado con el objetivo de lograr una mejoría de la disnea, la tos, la hemoptisis y de la calidad de vida del paciente (Grado 1C).

#### 4.e.2.h.2. Hemoptisis

La hemoptisis es una complicación frecuente en el cáncer avanzado. En el tratamiento de los casos en los que el sangrado proceda de tumor visible y accesible al broncoscopio, está indicada la realización de broncoscopia para tratar el sangrado con láser, argón o electrocauterio. Puede ser muy útil el broncoscopio como guía para la intubación en los casos que precisen ventilación asistida.

### *Recomendaciones*

- En todo paciente que sufra hemoptisis masiva se recomienda asegurar la vía aérea mediante un tubo endotraqueal de luz única. La broncoscopia está recomendada para identificar la fuente de sangrado, seguida, en caso de lesiones endobronquiales visibles, de técnicas como la coagulación con argón plasma, Nd:YAG laser y electrocauterio (Grado 1C).
- En todo paciente con hemoptisis leve o moderada, se recomienda realizar una broncoscopia para identificar el origen del sangrado. En lesiones visibles situadas en las vías aéreas centrales, están indicada la realización de tratamiento broncoscópico a nivel endobronquial. En lesiones distales o parenquimatosas, se recomienda la aplicación de radioterapia de haz externo (Grado 1C).

#### 4.e.2.h.3. Fístulas traqueo-esofágicas

Los casos de tumor con fístula traqueo-esofágica pueden presentar mejoría la clínica al realizar un cierre mediante prótesis autoexpandibles colocadas en tráquea y esófago con cese del aspirado de contenido esofágico a vía respiratoria.

#### *Recomendación*

- Ante el diagnóstico de fístula traqueo-esofágica, se recomienda la doble colocación de stents metálicos autoexpandibles en esófago y vía aérea, o solamente en esófago (Grado 1B).

#### **Resumen de recomendaciones**

| Recomendación                                                                                                                                                                                                                                                                                                                    | Grado |
|----------------------------------------------------------------------------------------------------------------------------------------------------------------------------------------------------------------------------------------------------------------------------------------------------------------------------------|-------|
| Dependiendo de la cantidad de derrame el paciente puede estar asintomático o presentar síntomas como disnea por restricción de la ventilación, tos o dolor pleurítico.                                                                                                                                                           | 1C    |
| Si los pacientes presentan mejoría de la clínica, el derrame se puede manejar con toracocentesis repetidas sobre todo en el caso de pacientes con enfermedad muy avanzada y expectativa de vida limitada a corto plazo.                                                                                                          | 1C    |
| La instilación de talco por VATS, es una cirugía minimamente invasiva con baja morbi mortalidad, que permite explorar toda la cavidad pleural e instilar el talco bajo visión directa; y su eficacia en la pleurodesis es mayor del 90% sobre todo en pacientes seleccionados.                                                   | 1C    |
| En caso de que la pleurodesis no pueda realizarse debido a un muy mal estado general, corta esperanza de vida o falta de reexpansión pulmonar post evacuación, se puede introducir un catéter de manera permanente permitiendo así al paciente el manejo ambulatorio.                                                            | 1C    |
| Ante el diagnóstico de CP en estadio avanzado y obstrucción sintomática de la vía aérea, el tratamiento broncoscópico mediante desbridamiento mecánico, ablación tumoral o colocación de stents está recomendado con el objetivo de lograr una mejoría de la disnea, la tos, la hemoptisis y de la calidad de vida del paciente. | 1C    |
| En todo paciente que sufra hemoptisis masiva se recomienda asegurar la vía aérea mediante un tubo endotraqueal de luz única. La broncoscopia está recomendada para identificar la fuente de sangrado, seguida, en caso de lesiones endobronquiales                                                                               | 1C    |

|                                                                                                                                                                                                                                                                                                                                                                                     |    |
|-------------------------------------------------------------------------------------------------------------------------------------------------------------------------------------------------------------------------------------------------------------------------------------------------------------------------------------------------------------------------------------|----|
| visibles, de técnicas como la coagulación con argón plasma, Nd:YAG laser y electrocauterio.                                                                                                                                                                                                                                                                                         |    |
| En todo paciente con hemoptisis leve o moderada, se recomienda realizar una broncoscopia para identificar el origen del sangrado. En lesiones visibles situadas en las vías aéreas centrales, están indicada la realización de tratamiento broncoscópico a nivel endobronquial. En lesiones distales o parenquimatosas, se recomienda la aplicación de radioterapia de haz externo. | 1C |
| Ante el diagnóstico de fístula traqueo-esofágica, se recomienda la doble colocación de stents metálicos autoexpandibles en esófago y vía aérea, o solamente en esófago.                                                                                                                                                                                                             | 1B |

## Bibliografía

1. Midthun DE, Jett JR: Lungtumors; in Albert RK, Spiro SG, Jett JR (eds): Clinical Respiratory Medicine, ed 3. Philadelphia, Mosby Elsevier, 2008,pp605–632.
2. Khaleeq G, Musani A. Emerging paradigms in the management of malignant pleural effusion. *Respir Med.* 2008;102:939–948.
3. Simoff MJ, Lally B, Slade MG. Symptom Management in Patients With Lung Cancer: Diagnosis and Management of Lung Cancer, 3rd ed: American College of Chest Physicians Evidence-Based Clinical Practice Guidelines. *Chest.* 2013;144:1743.
4. Neragi-Miandoab S. Surgical and other invasive approaches to recurrent pleural effusion with malignant etiology. *Support Care Cancer.* 2008;16:1323–1331.
5. Loddenkemper R, Mathur PN, Noppen M, Lee P. Indications for and results of medical thoracoscopy; in Loddenkemper R, Mathur PN, Noppen M, Lee P (eds): Medical Thoracoscopy/Pleuroscopy. Stuttgart, Thieme,2010,pp 22–52.
6. Antony VB. Pathogenesis of malignant pleural effusions and talc pleurodesis. *Pneumologie.* 1999;10:493–8.
7. Roberts ME, Neville E, Berrisford RG, Antunes G, Ali NJ; BTS Pleural Disease Guideline Group. Management of a malignant pleural effusion: British Thoracic Society Pleural Disease Guideline 2010. *Thorax.* 2010;65 Suppl 2:ii32-40.
8. Adler RH, Sayek I. Treatment of malignant pleural effusion: a method using tube thoracostomy and talc. *Ann Thorac Surg.* 1976;22:8–15.
9. Villanueva AG, Gray AW Jr, Shahian DM, Williamson WA, Beamis JF Jr. Efficacy of short term versus long term tube thoracostomy drainage before tetracycline pleurodesis in the treatment of malignant pleural effusions. *Thorax.* 1994;49:23–5.

10. Antony VB, Rothfuss KJ, Godbey SW, Sparks JA, Hott JW. Mechanism of tetracycline-hydrochloride-induced pleurodesis. *Am Rev Respir Dis*. 1992;146:1009–13.
11. Fentiman IS, Reubens RD, Hayward JL. Control of pleural effusions in patients with breast cancer. A randomized trial. *Cancer*. 1983;2:737–9.
12. Kraft A, Weindel K, Ochs A, Marth C, Zmija J, Schumacher P, et al. Vascular endothelial growth factor in the sera and effusions of patients with malignant and nonmalignant disease. *Cancer*. 1999;85:178–87.
13. Judson MA, Sahn SA. Pulmonary physiologic abnormalities caused by pleural disease. *Semin Respir Crit Care Med*. 1995;16:346–53.
14. Stretton F, Edmonds P, Marrinan M. Malignant pleural effusions. *Eur J Palliative Care*. 1999;6:5–9.
15. Dresler CM, Olak J, Herndon JE 2nd, Richards WG, Scalzetti E, Fleishman SB, et al. Phase III intergroup study of talc poudrage vs talc slurry sclerosis for malignant pleural effusion. *Chest*. 2005;127:909–915.
16. Stefani A, Natali P, Casali C, Morandi U. Talc poudrage versus talc slurry in the treatment of malignant pleural effusion: a prospective comparative study. *Eur J Cardiothorac Surg*. 2006;30:827–832.
17. Tan C, Sedrakyan A, Browne J, Swift S, Treasure T. The evidence on the effectiveness of management for malignant pleural effusion: a systematic review. *Eur J Cardiothorac Surg*. 2006;29:829–838.
18. Sioris T, Sihvo E, Salo J, Räsänen J, Knuuttila A. Long-term indwelling catheter (PleurX) for malignant pleural effusion unsuitable for talc pleurodesis. *Eur J Surg Oncol*. 2009;35: 546–551.
19. Villena Garrido V, Cases Viedma E, Fernández Villar A, de Pablo Gafas A, Pérez Rodríguez E, Porcel Pérez JM, et al. Normativa sobre el diagnóstico y tratamiento del derrame pleural. Actualización. *Arch Bronconeumol*. 2014;50:235–49.
20. Musch E, Gremmler B, Nitsch J, Rieger J, Malek M, Chrissafidou A. Intrapericardial instillation of mitoxantrone in palliative therapy of malignant pericardial effusion. *Onkologie*. 2003;26:135–139.
21. Lestuzzi C. Neoplastic pericardial disease: old and current strategies for diagnosis and management. *World J Cardiol*. 2010;2:270– 279.
22. Vaitkus PT, Herrmann H, Le Winter M. Treatment of malignant pericardial effusion. *JAMA*. 1994;272:59–64.
23. Kopecky SL, Callahan JA, Tajik AJ, Seward JB. Percutaneous pericardial catheter

- drainage: report of 42 consecutive cases. *Am J Cardiol.* 1986;58:633–635.
24. Swanson N, Mirza I, Wijesinghe N, Devlin G. Primary percutaneous balloon pericardi-otomy for malignant pericardial effusion. *Catheter Cardiovasc Intervent.* 2008;71:504–507.
25. Shepherd FA, Morgan C, Evans WK, Ginsberg JF, Watt D, Murphy K. Medical management of malignant pericardial effusion by tetracycline sclerosis. *Am J Cardiol.* 1987;60:1161–1166.
26. Maher EA, Shepherd FA, Todd TJ. Pericardial sclerosis as the primary management of malignant pericardial effusion and cardiac tamponade. *J Thorac Cardiovasc Surg.* 1996;112:637–643.
27. Liu G, Crump M, Goss PE, Dancey J, Shepherd FA. Prospective comparison of the sclerosing agents doxycycline and bleomycin for the primary management of malignant pericardial effusion and cardiac tamponade. *J Clin Oncol.* 1996;14:3141-3147.
28. Moriya T, Takiguchi Y, Tabeta H, Watanabe R, Kimura H, Nagao K, et al. Controlling malignant pericardial effusion by intrapericardial carboplatin administration in patients with primary non-small-cell lung cancer. *Br J Cancer.* 2000;83:858–862.
29. Tomkowski WZ, Filipecki S. Intrapericardial cisplatin for the management of patients with large malignant pericardial effusion in the course of the lung cancer. *Lung Cancer.* 1997;16:215–222.
30. Colt HG, Crawford SW. In vitro study of the safety limits of bronchoscopic argón plasma coagulation in the presence of airway stents. *Respirology.* 2006;11:643.
31. Strausz J, Kis S, Papai Z, Szima B, Juhasz J, Bolcskei P. Tracheobronchial silicone stent implantation with the flexible bronchoscope. *J Bronchol.* 1994;1:123.
32. Nomori H, Horio H, Suemasu K. Dumon stent placement via endotracheal tube. *Chest.* 1999;115:582.
33. Lunn W, Feller-Kopman D, Wahidi M, Ashiku S, Thurer R, Ernst A. Endoscopic removal of metallic airway stents. *Chest.* 2005;127:2106.
34. Puma F, Farabi R, Urbani M, Santoprete S, Daddi N, Di Meo A, et al. Long-term safety and tolerance of silicone and self-expandable airway stents: an experimental study. *Ann Thorac Surg.* 2000;69:1030-4.
35. Matsuo T, Colt HG. Evidence against routine scheduling of surveillance bronchoscopy after stent insertion. *Chest.* 2000;118:1455.

36. Alazemi S, Lunn W, Majid A, Berkowitz D, Michaud G, Feller-Kopman D, et al. Outcomes, health-care resources use, and costs of endoscopic removal of metallic airway stents. *Chest*. 2010;138:350.
37. Ernst A, Simoff M, Ost D, Goldman Y, Herth FJ. Prospective risk-adjusted morbidity and mortality outcome analysis after therapeutic bronchoscopic procedures: results of a multi-institutional outcomes database. *Chest*. 2008;134:514-9.
38. Shaw Y, Yoneda KY, Chan AL. Cerebral gas embolism from bronchoscopic argon plasma coagulation: a case report. *Respiration*. 2012;83:267.
39. Cavaliere S, Venuta F, Foccoli P, Toninelli C, La Face B. Endoscopic treatment of malignant airway obstruction in 2,008 patients. *Chest*. 1996;110:1536.
40. Asimakopoulos G, Beeson J, Evans J, Maiwand MO. Cryosurgery for malignant endobronchial tumors: analysis of outcome. *Chest*. 2005;127:2007.
41. Nag S, Kelly JF, Horton JL, Komaki R, Nori D. Brachytherapy for carcinoma of the lung. *Oncology (Williston Park)*. 2001;15:371.
42. Kelly JF, Delclos ME, Morice RC, Huaranga A, Allen PK, Komaki R. High-dose-rate endobronchial brachytherapy effectively palliates symptoms due to airway tumors: the 10-year M. D. Anderson cancer center experience. *Int J Radiat Oncol Biol Phys*. 2000;48:697.
43. Hara R, Itami J, Aruga T, Kozuka T, Nakajima K, Yamashita H, et al. Risk factors for massive hemoptysis after endobronchial brachytherapy in patients with tracheobronchial malignancies. *Cancer*. 2001;92:2623.
44. Reveiz L, Rueda JR, Cardona AF. Palliative endobronchial brachytherapy for non-small-cell lung cancer. *Cochrane Database Syst Rev*. 2012;CD004284.
45. Gomer CJ, Dougherty TJ. Determination of [3H]- and [14C]hematoporphyrin derivative distribution in malignant and normal tissue. *Cancer Res*. 1979;39:146.
46. Miyazu Y, Miyazawa T, Kurimoto N, Iwamoto Y, Kanoh K, Kohno N. Endobronchial ultrasonography in the assessment of centrally located early-stage lung cancer before photodynamic therapy. *Am J Respir Crit Care Med*. 2002;165:832.
47. McCaughan JS Jr, Williams TE. Photodynamic therapy for endobronchial malignant disease: a prospective fourteen-year study. *J Thorac Cardiovasc Surg*. 1997;114: 940.
48. Bollinger CT, Mathur PN, Beamis JF, Becker HD, Cavaliere S, Colt H, et al ERS/ATS statement on interventional pulmonology. *EurRespir J*. 2002;19:356-373.
49. Du Rand IA, Barber PV, Goldring J. British Thoracic Society guideline for advanced diagnostic and therapeutic flexible bronchoscopy in adults. *Thorax*. 2011;66:iii1-iii21.
